# Supplementary material for: Item-level analyses reveal genetic heterogeneity in neuroticism
Source: PubMed Central journal article supplement (PMC5834468; doi:10.1038/s41467-018-03242-8), 2018-03-02
Supplement: 41467_2018_3242_MOESM2_ESM.pdf [file 41467_2018_3242_MOESM2_ESM.pdf]

## Supplementary Information for

### **Item-level Analyses Reveal Genetic Heterogeneity in Neuroticism**

Nagel et al.

## Supplementary Note 1. Additional information on genetic overlap tests for top associated SNPs

Before conducting the sign concordance tests to establish whether signs of top associated SNPs were in the same direction across the 13 phenotypes, we used clumping ( $r^2 = 0.1$  with window size 500 kb) based on the association  $P$  values to ensure that the most strongly associated variants were not lost. As clumping results in different SNP sets for different phenotypes, sign tests results are not symmetrical for pairs of phenotypes. To explicate the followed procedure:

- 1) Select two items I1 & I2
- 2) Retain only SNPs that survived clumping for item I1
- 3) Filter out all variants with  $P >$  threshold for phenotype I1
- 4) Of the selected SNPs, compute the number of SNPs that have the same sign (i.e., concordant) for both I1 and I2
- 5) The proportion we report is:  $prop = \frac{N_{concordant}}{N_{total}}$  (both numbers in this equation only contain SNPs below the specified  $P$  threshold for item I1, mentioned in step 3)
- 6) Repeat for all combinations of items and sum-score

In addition, we repeat the procedure with the difference that clumping and  $P$  value filtering is based on item I2 instead of item I1. This results in heatmaps (visualizing the proportion of concordant sign SNPs) that are not symmetric, which can be seen from the number of SNPs reported in each cell.

Prior to performing Fisher's exact tests to examine the overlap in the top associated SNPs across the 13 neuroticism phenotypes, we applied LD-based pruning on the summary statistics from all items to ensure that SNPs were independent (a subset of 10,000 individuals from the UK biobank, the UK10K set, was used as a reference set;  $r^2 = 0.8$ ). Using the SNPs that survived pruning, we then created (for each combination of items, and for each  $P$  value

threshold) a table like the one depicted below. The categories in the table below are exclusive, meaning that a SNP in cell **A** is not included in the count of cells **B** and **C**.

|                                                                                                      |                                                                                                      |
|------------------------------------------------------------------------------------------------------|------------------------------------------------------------------------------------------------------|
| <b>A</b><br>Number of SNPs < $P_{\text{threshold}}$ for both items                                   | <b>B</b><br>Number of SNPs < $P_{\text{threshold}}$ for item 2 & > $P_{\text{threshold}}$ for item 1 |
| <b>C</b><br>Number of SNPs < $P_{\text{threshold}}$ for item 1 & > $P_{\text{threshold}}$ for item 2 | <b>D</b><br>Number of SNPs > $P_{\text{threshold}}$ for both items                                   |

**Supplementary Note 2. Diagnostic criteria major depressive disorder**

Below we list the symptoms used in the diagnosis of major depressive disorder, as described more extensively in the Diagnostic and Statistical Manual (DSM-5<sup>8</sup>).

1. Depressed mood
2. Diminished interest or pleasure
3. Weight loss or weight gain, or decrease or increase in appetite
4. Insomnia or hypersomnia
5. Psychomotor agitation or retardation
6. Fatigue or loss of energy
7. Feelings of worthlessness or excessive or inappropriate
8. Diminished ability to think or concentrate, or indecisiveness
9. Recurrent thoughts of death, recurrent suicidal ideation

**Supplementary Table 1. Content, corresponding abbreviations, *N*, and endorsement rates of the 12 EPQ-RS<sup>1</sup> neuroticism items and the sum-score in sample 1**

| Abbreviation | Item (UKB field code)                                                                                                                                    | Female |             | Male   |             | Total   |             |
|--------------|----------------------------------------------------------------------------------------------------------------------------------------------------------|--------|-------------|--------|-------------|---------|-------------|
|              |                                                                                                                                                          | N      | % yes       | N      | % yes       | N       | % yes       |
| IRR          | Are you an irritable person? (1940)<br>“Feeling irritable” (IDS)                                                                                         | 55,729 | 0.27        | 50,628 | 0.31        | 106,357 | 0.29        |
| LONE         | Do you often feel lonely? (2020)<br>“I feel lonely” (YASR)                                                                                               | 57,295 | 0.21        | 51,867 | 0.15        | 109,162 | 0.18        |
| MIS          | Do you ever feel ‘just miserable’ for no reason? (1930)<br>Depressed mood (HDRS)                                                                         | 57,301 | 0.49        | 51,746 | 0.36        | 109,047 | 0.43        |
| MOOD         | Does your mood often go up and down? (1920)                                                                                                              | 56,935 | 0.48        | 51,416 | 0.43        | 108,351 | 0.45        |
| FED-UP       | Do you often feel ‘fed-up’? (1960)                                                                                                                       | 57,086 | 0.43        | 51,677 | 0.38        | 108,763 | 0.41        |
| NERV-FEEL    | Would you call yourself a nervous person? (1970)<br>“I am nervous or tense” (YASR)                                                                       | 56,639 | 0.27        | 51,624 | 0.19        | 108,263 | 0.23        |
| WORRY        | Are you a worrier? (1980)<br>“I worry a lot” (YASR)                                                                                                      | 56,852 | 0.64        | 51,371 | 0.47        | 108,223 | 0.56        |
| TENSE        | Would you call yourself tense or ‘highly strung’? (1990)<br>Feeling anxious or tense (IDS)                                                               | 56,398 | 0.20        | 51,285 | 0.15        | 107,683 | 0.18        |
| SUF-NERV     | Do you suffer from ‘nerves’? (2010)                                                                                                                      | 56,057 | 0.21        | 51,121 | 0.21        | 107,178 | 0.21        |
| HURT         | Are your feelings easily hurt? (1950)<br>Interpersonal sensitivity (IDS)                                                                                 | 56,713 | 0.64        | 51,190 | 0.45        | 107,903 | 0.55        |
| WORR-EMB     | Do you worry too long after an embarrassing experience? (2000)                                                                                           | 55,793 | 0.54        | 50,838 | 0.40        | 106,631 | 0.47        |
| GUILT        | Are you often troubled by feelings of guilt? (2030)<br>“I feel too guilty” (YASR);<br>Feelings of guilt/worthlessness (BDI);<br>Feelings of guilt (HDRS) | 56,764 | 0.34        | 51,477 | 0.22        | 108,241 | 0.28        |
|              |                                                                                                                                                          | Female |             | Male   |             | Total   |             |
|              | <b>Phenotype</b>                                                                                                                                         | N      | M (SD)      | N      | M (SD)      | N       | M (SD)      |
| SUM-SCORE    | Neuroticism sum-score                                                                                                                                    | 57,958 | 4.62 (3.20) | 52,370 | 3.64 (3.16) | 110,328 | 4.16 (3.22) |

Descriptive statistics for the 12 neuroticism items and the sum-score in sample 1 (UKB data: first release). Below the neuroticism items (black font), highly similar items (content and source; grey font) from renowned depression/anxiety questionnaires are displayed. The neuroticism sum-score ranges from 0 to 12.

BDI = Beck Depression Inventory<sup>2</sup>; IDS = Inventory of Depressive Symptomatology<sup>3</sup>; HDRS = Hamilton Depression Rating Scale<sup>4</sup>; YASR = Young Adult Self Report scale<sup>5</sup>.

**Supplementary Table 2. Content, corresponding abbreviations, *N*, and endorsement rates of the 12 EPQ-RS<sup>1</sup> neuroticism items and the sum-score in sample 2**

| Abbreviation | Item (UKB field code)                                          | Female  |             | Male    |             | Total   |             |
|--------------|----------------------------------------------------------------|---------|-------------|---------|-------------|---------|-------------|
|              |                                                                | N       | % yes       | N       | % yes       | N       | % yes       |
| IRR          | Are you an irritable person? (1940)                            | 141,978 | 0.26        | 118,391 | 0.31        | 260,369 | 0.28        |
| LONE         | Do you often feel lonely? (2020)                               | 145,829 | 0.20        | 121,361 | 0.15        | 267,190 | 0.18        |
| MIS          | Do you ever feel 'just miserable' for no reason? (1930)        | 145,908 | 0.49        | 121,142 | 0.35        | 267,050 | 0.43        |
| MOOD         | Does your mood often go up and down? (1920)                    | 145,029 | 0.47        | 120,353 | 0.42        | 265,382 | 0.45        |
| FED-UP       | Do you often feel 'fed-up'? (1960)                             | 145,371 | 0.42        | 120,837 | 0.38        | 266,208 | 0.4         |
| NERV-FEEL    | Would you call yourself a nervous person? (1970)               | 144,117 | 0.27        | 120,741 | 0.20        | 264,858 | 0.24        |
| WORRY        | Are you a worrier? (1980)                                      | 144,680 | 0.64        | 119,966 | 0.48        | 264,646 | 0.57        |
| TENSE        | Would you call yourself tense or 'highly strung'? (1990)       | 143,631 | 0.20        | 120,004 | 0.15        | 263,635 | 0.18        |
| SUF-NERV     | Do you suffer from 'nerves'? (2010)                            | 142,635 | 0.21        | 119,686 | 0.22        | 262,321 | 0.21        |
| HURT         | Are your feelings easily hurt? (1950)                          | 144,356 | 0.64        | 119,788 | 0.45        | 264,144 | 0.56        |
| WORR-EMB     | Do you worry too long after an embarrassing experience? (2000) | 142,172 | 0.54        | 118,922 | 0.40        | 261,094 | 0.48        |
| GUILT        | Are you often troubled by feelings of guilt? (2030)            | 144,580 | 0.34        | 120,559 | 0.22        | 265,139 | 0.29        |
|              |                                                                | Female  |             | Male    |             | Total   |             |
|              | Phenotype                                                      | N       | M (SD)      | N       | M (SD)      | N       | M (SD)      |
| SUM-SCORE    | Neuroticism sum-score                                          | 147,598 | 4.58 (3.18) | 122,580 | 3.65 (3.16) | 270,178 | 4.16 (3.21) |

Descriptive statistics for the 12 neuroticism items and the sum-score in sample 2 (UKB data: first release). The neuroticism sum-score ranges from 0 to 12.

**Supplementary Table 3. Overview of binary external variables used in phenotypic association analysis in sample 1**

| <b>Item</b>                                                       | <b><i>N</i></b> | <b>Percentage yes</b> | <b>UKB field code</b> |
|-------------------------------------------------------------------|-----------------|-----------------------|-----------------------|
| <i>Binary variables</i>                                           |                 |                       |                       |
| Depressed mood (“Not at all” vs. other categories)                | 106,152         | 23.4%                 | 2050                  |
| Unenthusiasm/disinterest (“Not at all” vs. other categories)      | 107,125         | 21.0%                 | 2060                  |
| Tenseness/restlessness (“Not at all” vs. other categories)        | 106,825         | 26.5%                 | 2070                  |
| Tiredness/lethargy (“Not at all” vs. other categories)            | 107,516         | 52.7%                 | 2080                  |
| Visit psychiatrist for nerves/anxiety/tension/depression          | 109,965         | 11.8%                 | 2100                  |
| Visit doctor (GP) for nerves/anxiety/tension/depression           | 109,729         | 34.5%                 | 2090                  |
| Ever highly irritable/argumentative for 2 days                    | 36,395          | 18.5%                 | 4653                  |
| Ever depressed for a whole week                                   | 36,472          | 53.6%                 | 4598                  |
| Ever manic/hyper for 2 days                                       | 36,255          | 6.0%                  | 4642                  |
| Ever disinterested/unenthusiastic for a whole week                | 35,728          | 37.0%                 | 4631                  |
| Bipolar disorder (both hypo- and hypermania)                      | 110,328         | 0.3%                  | 20122                 |
| Probable recurrent MDD (severe)                                   | 110,328         | 1.9%                  | 20125                 |
| Probable recurrent MDD (moderate)                                 | 110,328         | 3.1%                  | 20124                 |
| Insomnia/sleeplessness (“never/rarely”/“sometimes” vs. “usually”) | 110,255         | 28.5%                 | 1200                  |
| Single episode of probable MDD                                    | 110,328         | 2.0%                  | 20123                 |
| Risk taking                                                       | 106,831         | 26.8%                 | 2040                  |
| Sex (being male)                                                  | 110,328         | 47.5%                 | 31                    |

Content, sample size (*N*) and endorsement rate (percentage of positive “yes” versus “no” or *NA* responses) for the binary external variables used in phenotypic association analysis in subsample 1 (UKB data: first release) as depicted in **Supplementary Figure 2**.

**Supplementary Table 4. Overview of continuous external variables used in phenotypic association analysis in sample 1**

| <b>Item</b>                                                               | <b>N</b> | <b>M</b> | <b>SD</b> | <b>Range</b> | <b>UKB field code</b> |
|---------------------------------------------------------------------------|----------|----------|-----------|--------------|-----------------------|
| <i>Continuous variables</i>                                               |          |          |           |              |                       |
| No. of depression episodes (duration at least one week)                   | 14,269   | 3.7      | 4.4       | 1 - 20       | 4620                  |
| No. of disinterested/unenthusiastic episodes (duration at least one week) | 9,431    | 4.1      | 4.8       | 1 - 20       | 5386                  |
| Longest period of depression                                              | 15,898   | 16.2     | 41.9      | 1 - 999      | 4609                  |
| Longest period of disinterest/unenthusiasm                                | 10,151   | 16.0     | 44.9      | 1 - 999      | 5375                  |
| Townsend deprivation index (TDI)                                          | 110,183  | -1.4     | 3.0       | -6.3 - 10.6  | 189                   |
| Height                                                                    | 110,122  | 168.8    | 9.2       | 122 - 205    | 50                    |
| Age                                                                       | 110,328  | 56.7     | 8.0       | 39 - 70      | 21003                 |
| Financial satisfaction                                                    | 36,944   | 4.3      | 1.0       | 1 - 6        | 4581                  |
| Friendships satisfaction                                                  | 36,693   | 4.8      | 0.7       | 1 - 6        | 4570                  |
| Family satisfaction                                                       | 36,707   | 4.8      | 0.9       | 1 - 6        | 4559                  |
| Health satisfaction                                                       | 36,981   | 4.2      | 0.9       | 1 - 6        | 4548                  |
| Work satisfaction                                                         | 25,554   | 4.4      | 0.9       | 1 - 6        | 4537                  |
| Happiness                                                                 | 36,970   | 4.5      | 0.7       | 1 - 6        | 4526                  |

Content, sample size (*N*), mean (*M*) and standard deviation (*SD*) and item response range for the continuously measured external variables used in phenotypic association analyses in subsample 1 (UKB data: first release) as depicted in **Supplementary Figure 3**.

**Supplementary Table 5. Content, corresponding abbreviations, *N*, and endorsement rates of the 12 EPQ-RS<sup>1</sup> neuroticism items and the sum-score in the full (meta-analyzed) sample**

| Abbreviation | Item (UKB field code)                                          | Female  |             | Male    |             | Total   |             |
|--------------|----------------------------------------------------------------|---------|-------------|---------|-------------|---------|-------------|
|              |                                                                | N       | % yes       | N       | % yes       | N       | % yes       |
| IRR          | Are you an irritable person? (1940)                            | 197,707 | 0.26        | 169,019 | 0.31        | 366,726 | 0.28        |
| LONE         | Do you often feel lonely? (2020)                               | 203,124 | 0.21        | 173,228 | 0.15        | 376,352 | 0.18        |
| MIS          | Do you ever feel 'just miserable' for no reason? (1930)        | 203,209 | 0.49        | 172,888 | 0.35        | 376,097 | 0.43        |
| MOOD         | Does your mood often go up and down? (1920)                    | 201,964 | 0.47        | 171,769 | 0.43        | 373,733 | 0.45        |
| FED-UP       | Do you often feel 'fed-up'? (1960)                             | 202,457 | 0.43        | 172,514 | 0.38        | 374,971 | 0.4         |
| NERV-FEEL    | Would you call yourself a nervous person? (1970)               | 200,756 | 0.27        | 172,365 | 0.20        | 373,121 | 0.24        |
| WORRY        | Are you a worrier? (1980)                                      | 201,532 | 0.64        | 171,337 | 0.48        | 372,869 | 0.57        |
| TENSE        | Would you call yourself tense or 'highly strung'? (1990)       | 200,029 | 0.20        | 171,289 | 0.15        | 371,318 | 0.18        |
| SUF-NERV     | Do you suffer from 'nerves'? (2010)                            | 198,692 | 0.21        | 170,807 | 0.22        | 369,499 | 0.21        |
| HURT         | Are your feelings easily hurt? (1950)                          | 201,069 | 0.64        | 170,978 | 0.45        | 372,047 | 0.55        |
| WORR-EMB     | Do you worry too long after an embarrassing experience? (2000) | 197,965 | 0.54        | 169,760 | 0.40        | 367,725 | 0.48        |
| GUILT        | Are you often troubled by feelings of guilt? (2030)            | 201,344 | 0.34        | 172,036 | 0.22        | 373,380 | 0.29        |
|              |                                                                | Female  |             | Male    |             | Total   |             |
|              | Phenotype                                                      | N       | M (SD)      | N       | M (SD)      | N       | M (SD)      |
| SUM-SCORE    | Neuroticism sum-score                                          | 205,556 | 4.59 (3.19) | 174,950 | 3.65 (3.16) | 380,506 | 4.16 (3.21) |

Descriptive statistics for the 12 neuroticism items and the sum-score in the full sample (UKB data: sample 1 and 2 combined). The neuroticism sum-score ranges from 0 to 12.



**Supplementary Table 6. Functional consequences on genes of all SNPs in LD with an independent significant SNP in item- vs. sum-score analysis**

|                         | <b>Item-level*</b> | <b>Sum-score</b> |
|-------------------------|--------------------|------------------|
| 3'-UTR                  | 322                | 175              |
| 5'-UTR                  | 110                | 74               |
| Exonic                  | 286                | 151              |
| Intergenic              | 9,693              | 5,141            |
| Intronic                | 13,023             | 7,265            |
| Non-coding RNA exonic   | 299                | 142              |
| Non-coding RNA intronic | 2,821              | 1,887            |
| Non-coding RNA splicing | -                  | -                |
| Splicing                | 1                  | -                |
| Downstream              | 324                | 131              |
| Upstream                | 313                | 109              |

Note: SNPs in the MHC region were excluded from annotation. A small portion of the SNPs could not be annotated by ANNOVAR.

\*SNPs that were in LD with an independent significant SNP for at least one of the 12 neuroticism items.

**Supplementary Table 7. Minimum chromatin state of all SNPs in LD with an independent significant SNP in item- vs. sum-score analysis**

|                             | <b>Item-level*</b> | <b>Sum-score</b> |
|-----------------------------|--------------------|------------------|
| 1: Active TSS               | 1,749              | 890              |
| 2: Flanking Active TSS      | 1,403              | 863              |
| 3: Transcr. at gene 5' & 3' | 285                | 145              |
| 4: Strong transcription     | 5,230              | 3,080            |
| 5: Weak transcription       | 9,833              | 5,972            |
| 6: Genic enhancers          | 10                 | 5                |
| 7: Enhancers                | 1,021              | 537              |
| 8: ZNF genes & repeats      | 787                | 201              |
| 9: Heterochromatin          | 5,085              | 2,596            |
| 12: Bivalent enhancer       | 8                  | 3                |
| 13: Repressed PolyComb      | 368                | 157              |
| 14: Weak Repressed PolyComb | 1,070              | 490              |
| 15: Quiescent/Low           | 364                | 221              |

Note: SNPs in the MHC region were excluded from annotation.

\*SNPs that were in LD with an independent significant SNP for at least one of the 12 neuroticism items.

**Supplementary Table 8. Regulome database score of all SNPs in LD with an independent significant SNP in item- vs. sum-score analysis**

|                                                                  | <b>Item-level*</b> | <b>Sum-score</b> |
|------------------------------------------------------------------|--------------------|------------------|
| 1a: eQTL + TF binding + matched TF motif + matched DNase Footpr  | 9                  | 4                |
| 1b: eQTL + TF binding + any motif + DNase Footpr + DNase peak    | 71                 | 35               |
| 1c: eQTL + TF binding + matched TF motif + DNase peak            | 4                  | 4                |
| 1d: eQTL + TF binding + any motif + DNase peak                   | 73                 | 42               |
| 1e: eQTL + TF binding + matched TF motif                         | 2                  | -                |
| 1f: eQTL + TF binding / DNase peak                               | 866                | 534              |
| 2a: TF binding + match TF motif + matchDNase Footpr + DNase peak | 43                 | 24               |
| 2b: TF binding + any motif + DNase Footpr + DNase peak           | 385                | 214              |
| 2c: TF binding + matched TF motif + DNase peak                   | 23                 | 12               |
| 3a: TF binding + any motif + DNase peak                          | 464                | 258              |
| 3b: TF binding + matched TF motif                                | 11                 | 6                |
| 4: TF binding + DNase peak                                       | 1,349              | 744              |
| 5: TF binding or DNase peak                                      | 4,532              | 2,829            |
| 6: other                                                         | 7,355              | 3,990            |
| 7: not regulatory                                                | 8,520              | 4,589            |

Note: SNPs in the MHC region were excluded from annotation.

\*SNPs that were in LD with an independent significant SNP for at least one of the 12 neuroticism items.

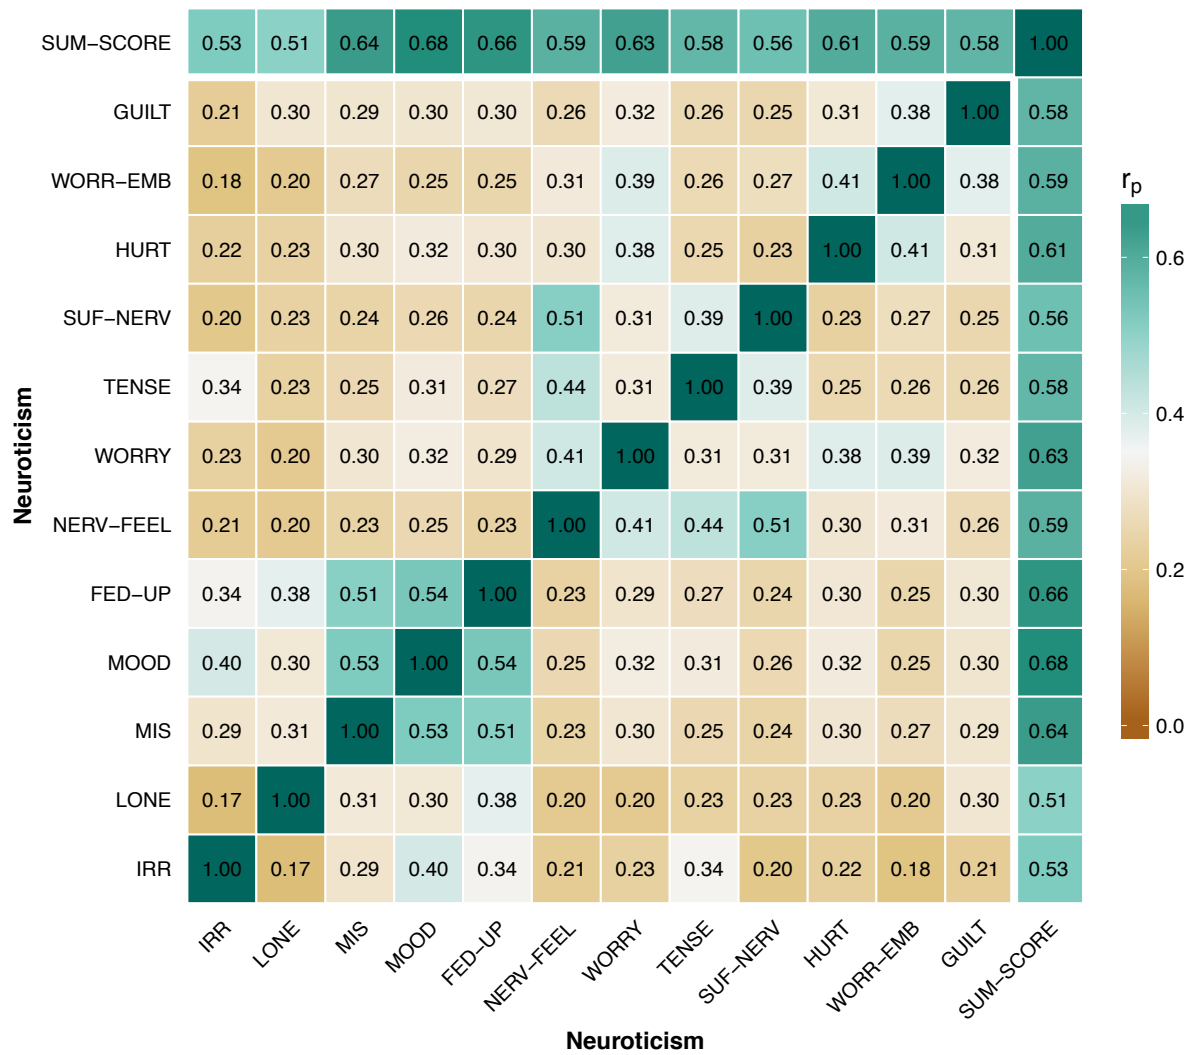

**Supplementary Figure 1. Phenotypic correlations between all 12 neuroticism items and the neuroticism sum-score in sample 1.**

The correlation heatmap is symmetric. See **Supplementary Table 1** for an explanation of item labels.

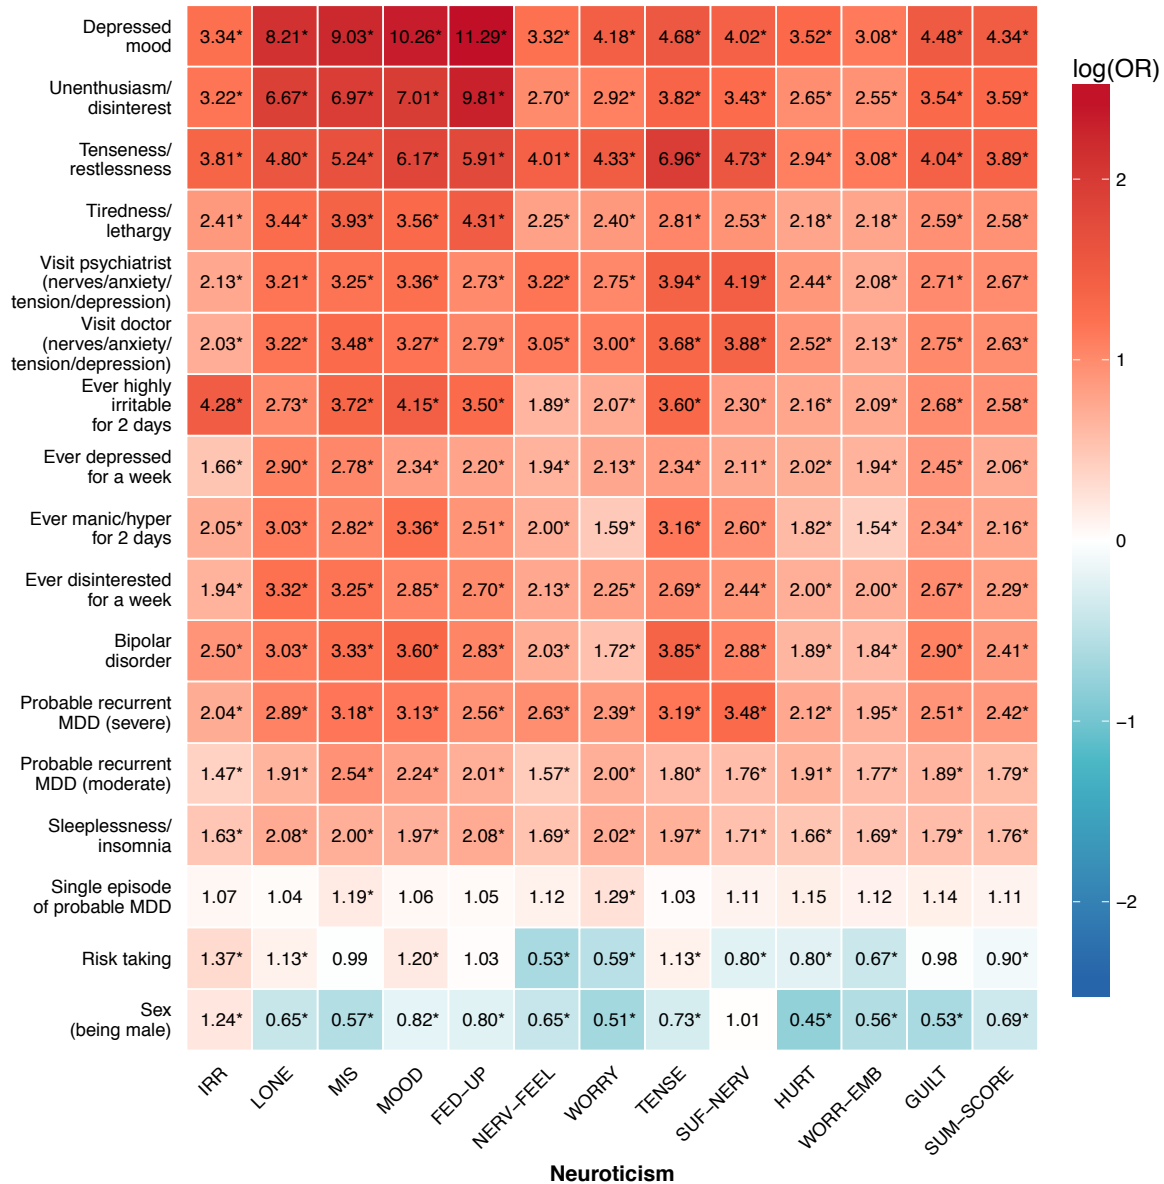

**Supplementary Figure 2. Phenotypic associations of the 12 neuroticism items and the neuroticism sum-score (x-axis) with 17 dichotomous external variables (y-axis) in sample 1.**

The numbers in the heatmap represent effect sizes expressed as odds ratios (coloring is based on log odds). See **Supplementary Table 1** for an explanation of neuroticism item labels. See **Supplementary Table 3** for descriptives on the external variables displayed in this figure.

\*Bonferroni corrected  $P$  value threshold:  $P < 1.28 \times 10^{-4}$  ( $0.05 / ((17+13) \times 13)$ ).

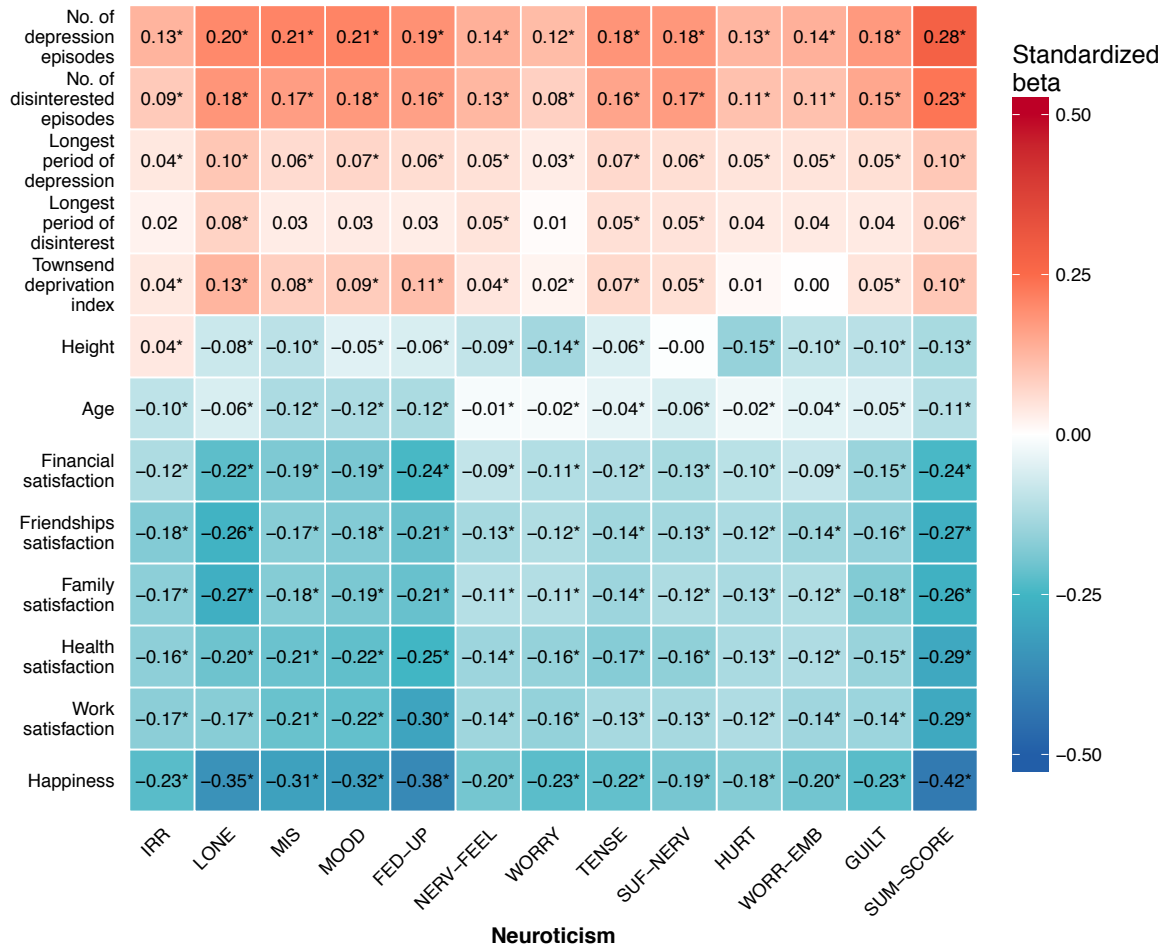

**Supplementary Figure 3. Phenotypic associations of the 12 neuroticism items and the neuroticism sum-score (x-axis) with 13 continuous external variables (y-axis) in sample 1.**

The numbers in the heatmap represent effect sizes expressed as standardized beta coefficients. See **Supplementary Table 1** for an explanation of neuroticism item labels. See **Supplementary Table 4** for descriptives on the external variables displayed in this figure.

\*Bonferroni corrected  $P$  value threshold:  $P < 1.28 \times 10^{-4}$  ( $0.05 / ((17+13) \times 13)$ ).

### IRR - Are you an irritable person?

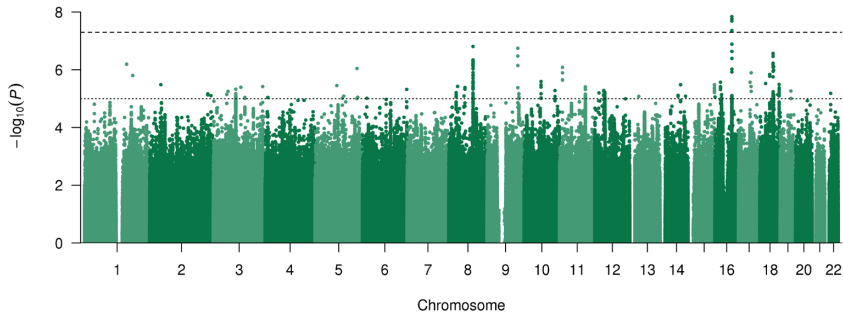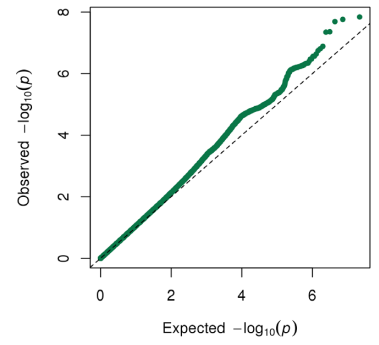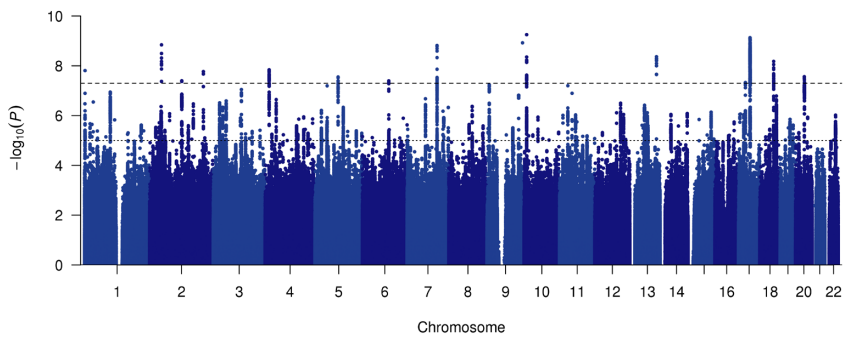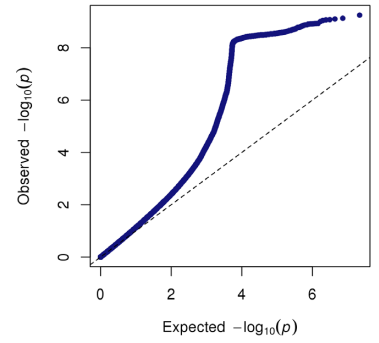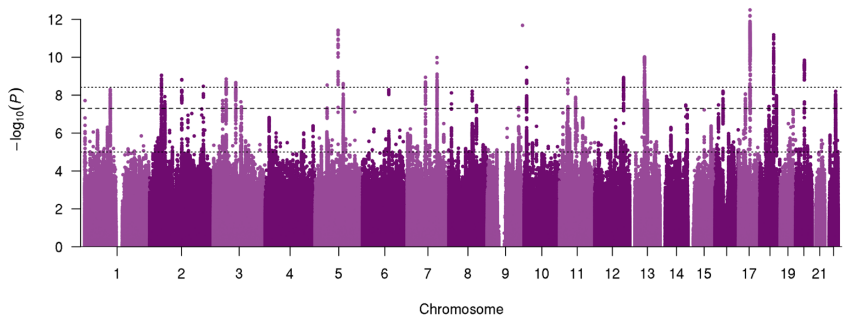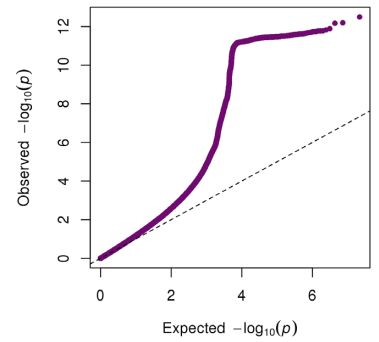

LONE - Do you often feel lonely?

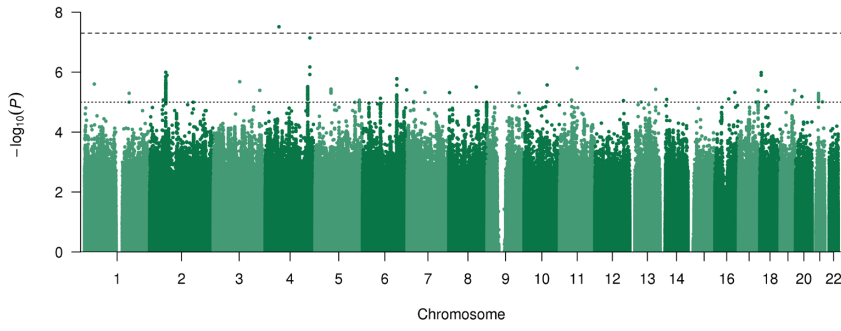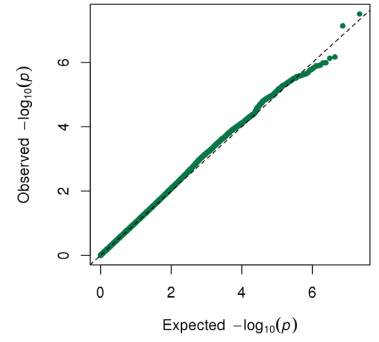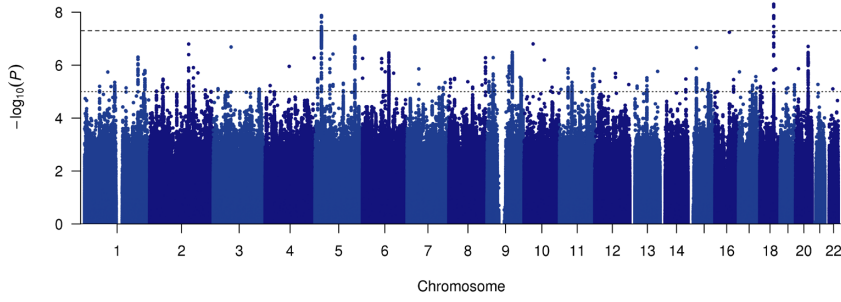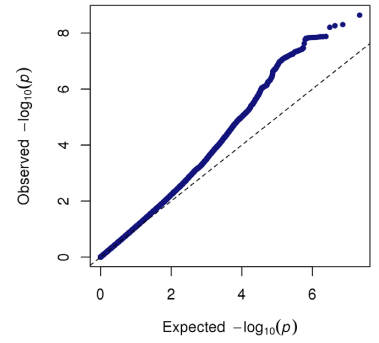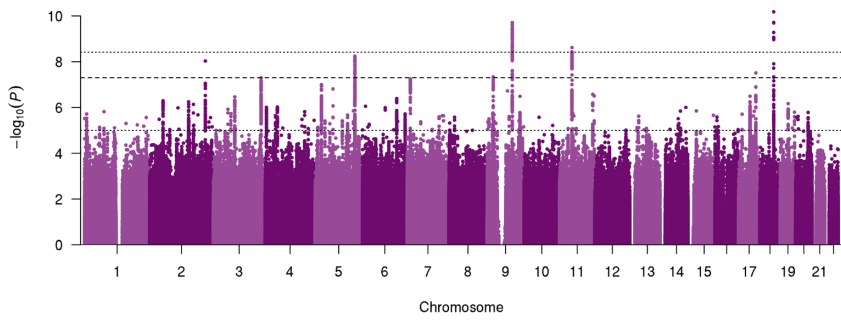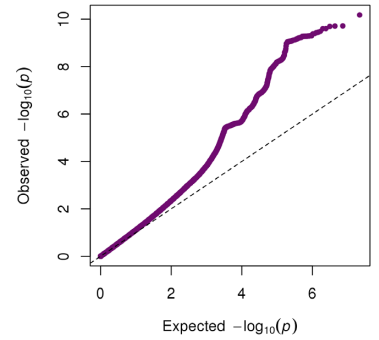



MIS - Do you ever feel 'just miserable' for no reason?

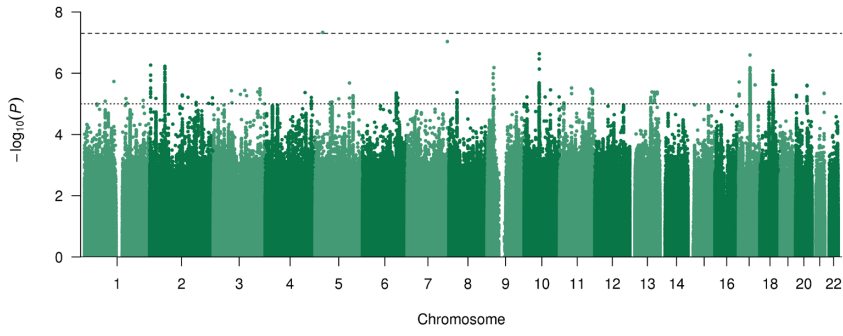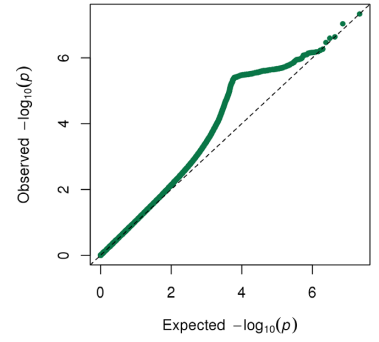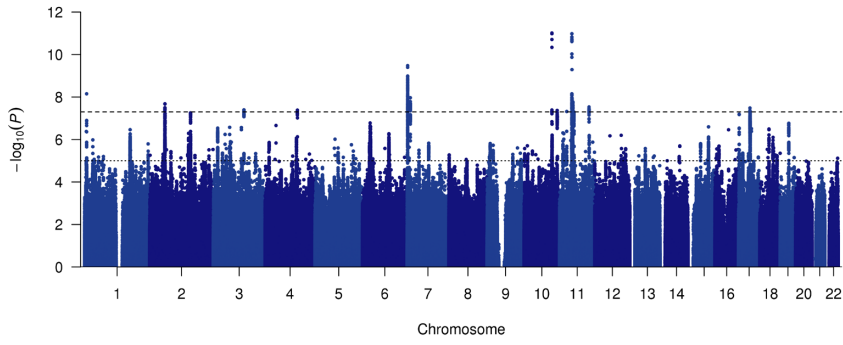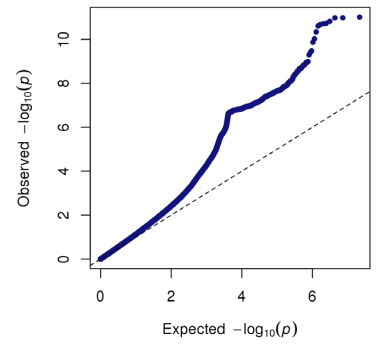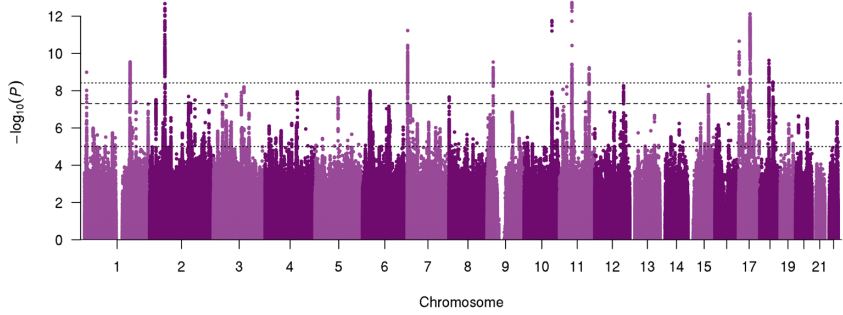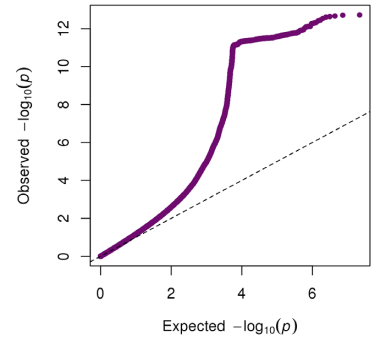

MOOD - Does your mood often go up and down?

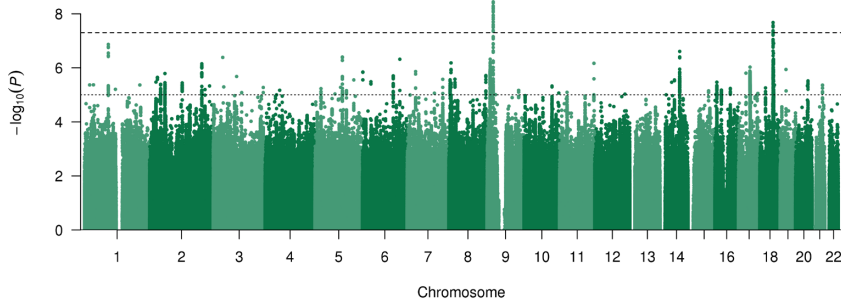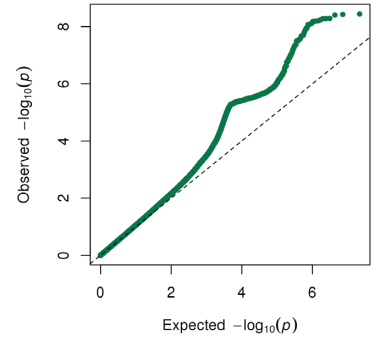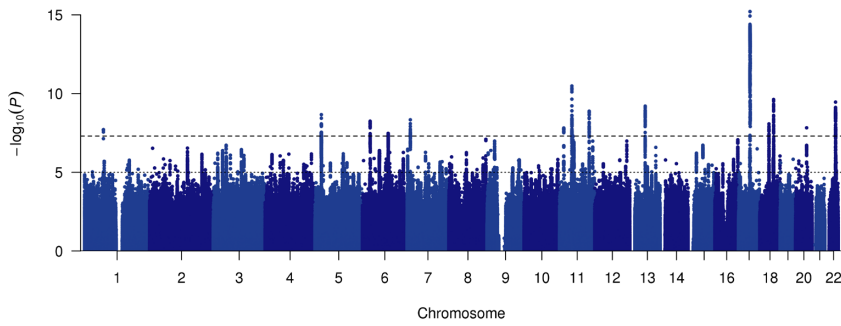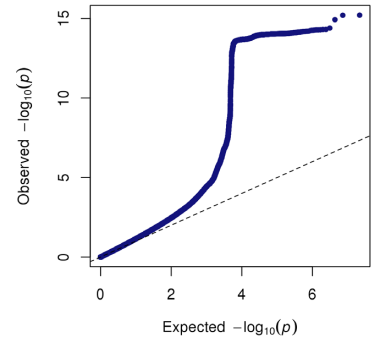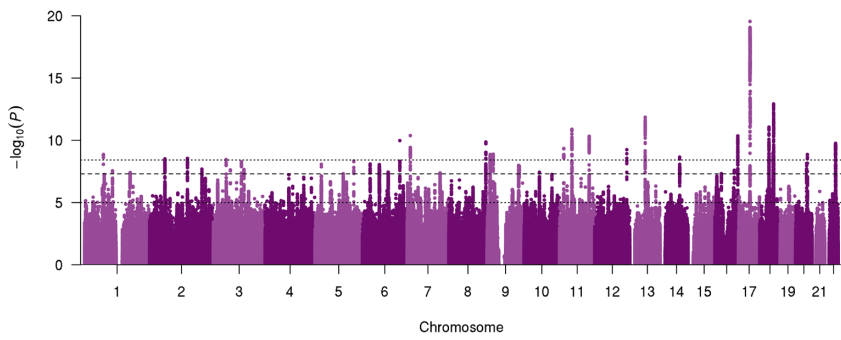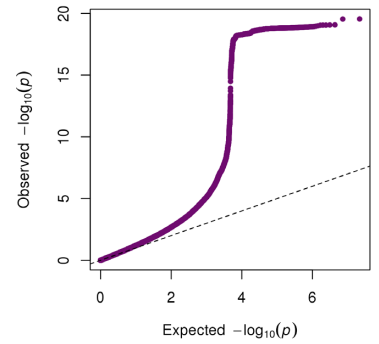

### FED-UP - Do you often feel 'fed-up'?

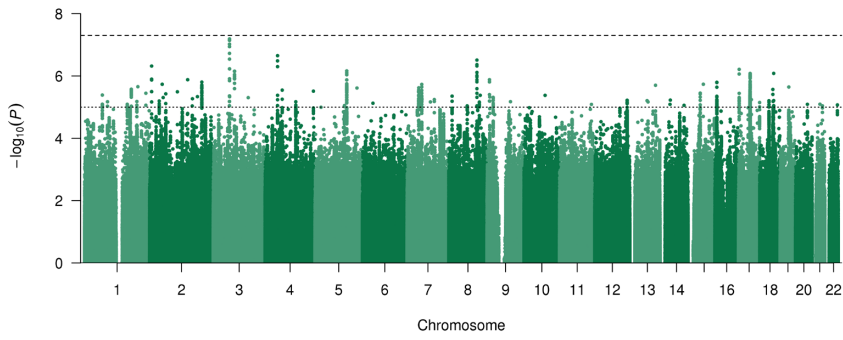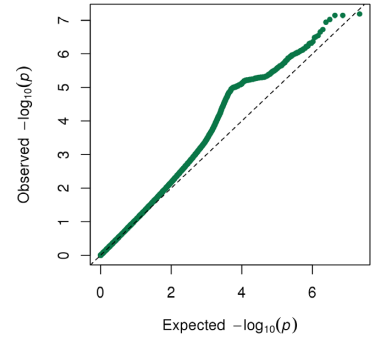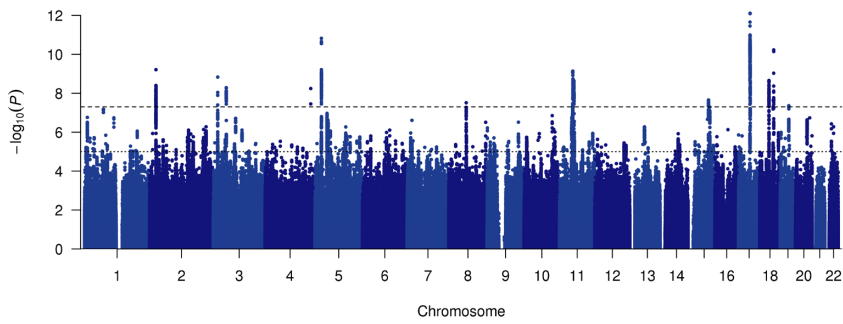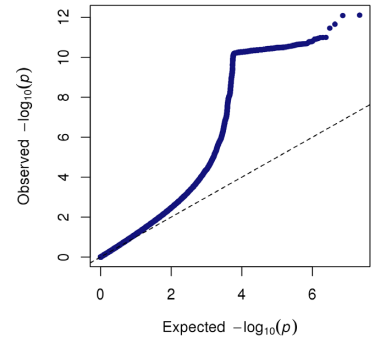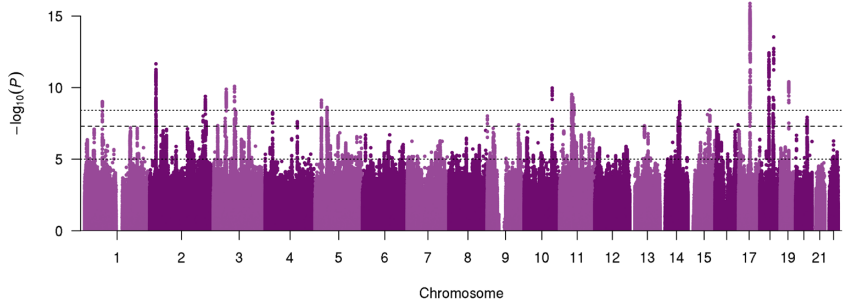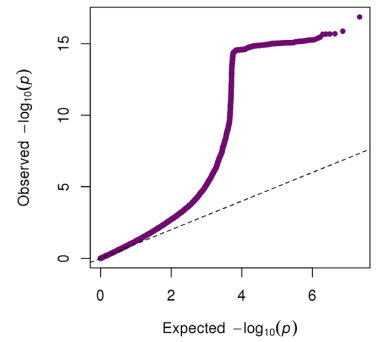

NERV-FEEL - Would you call yourself a nervous person?

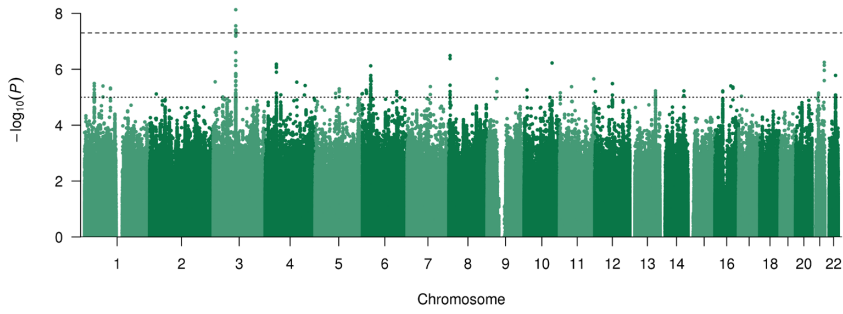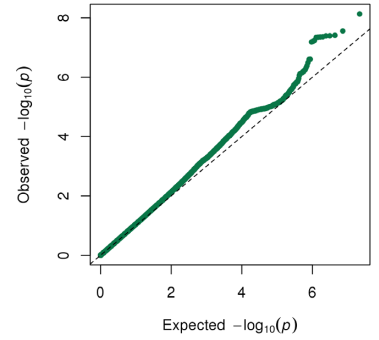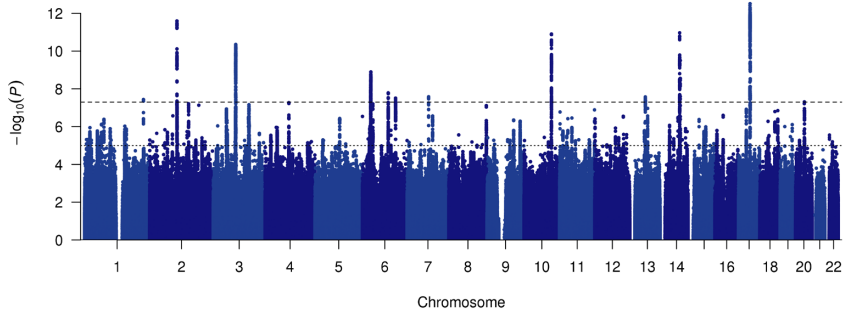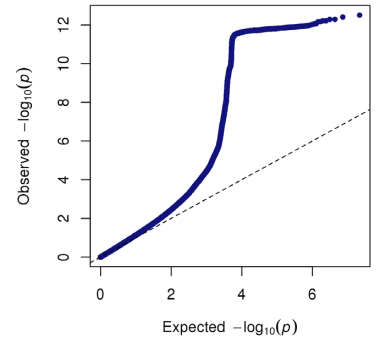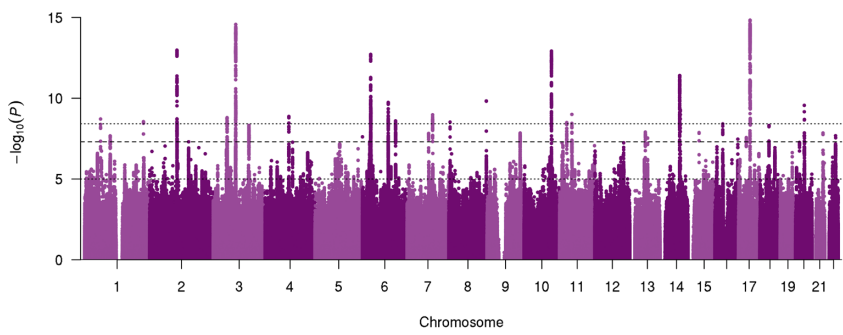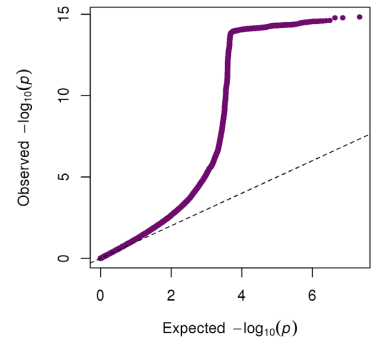

### WORRY - Are you a worrier?

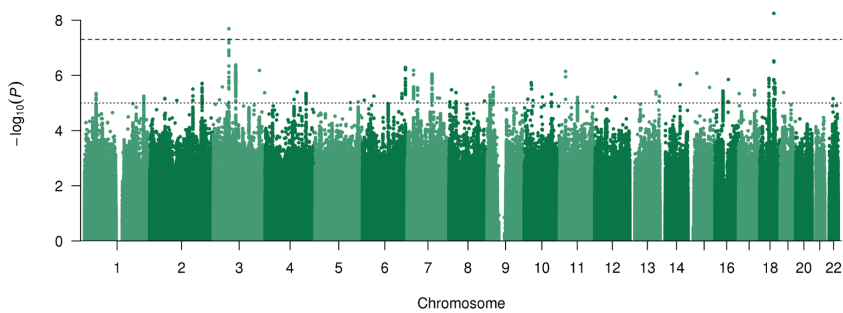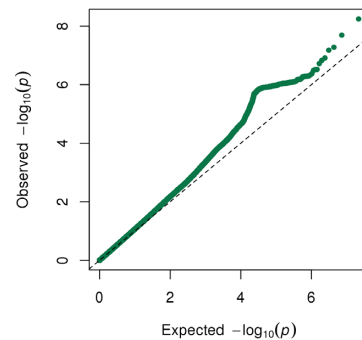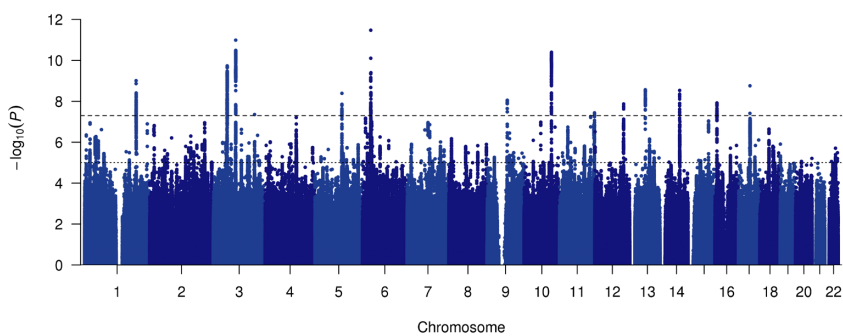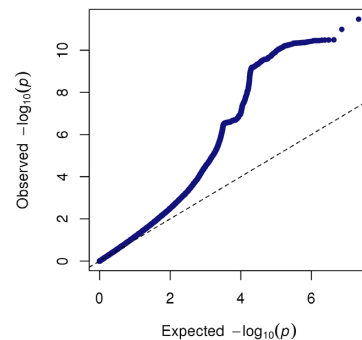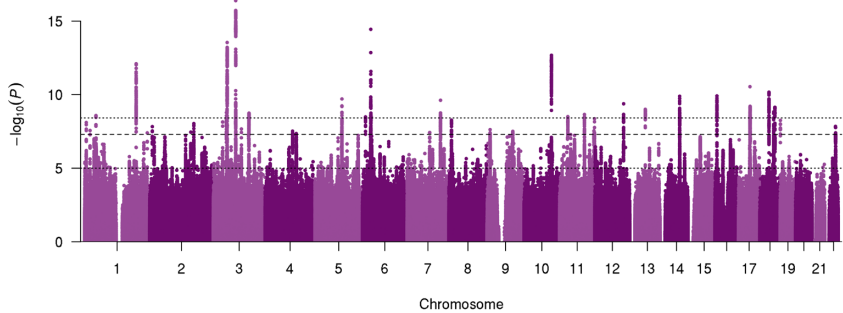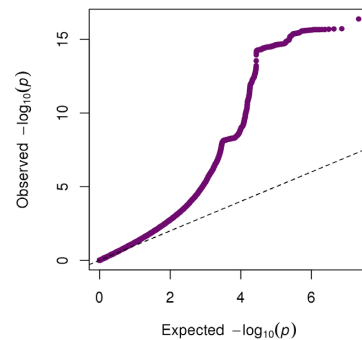

TENSE - Would you call yourself tense or 'highly strung'?

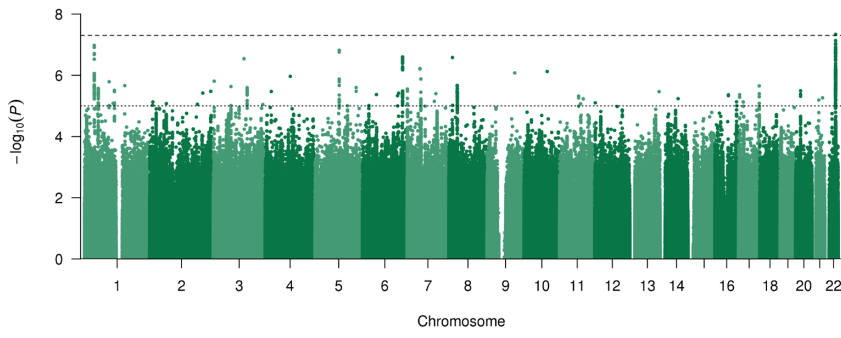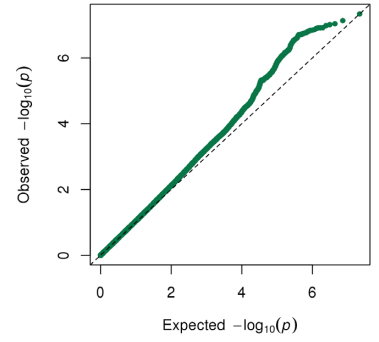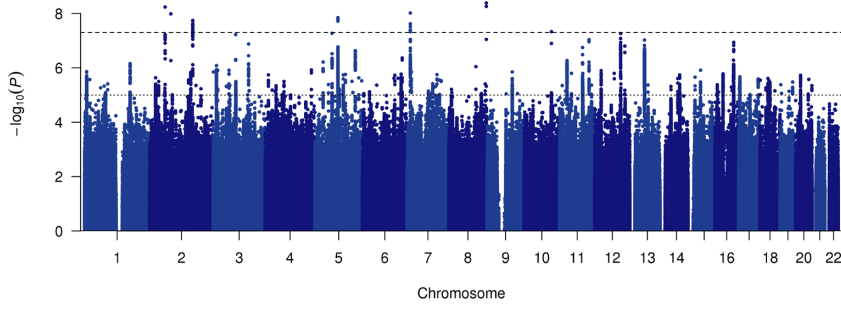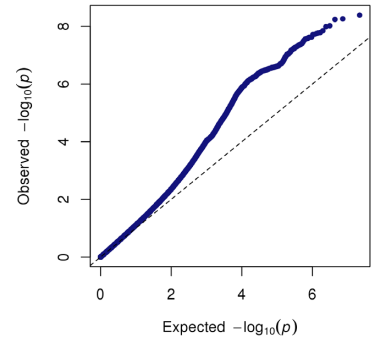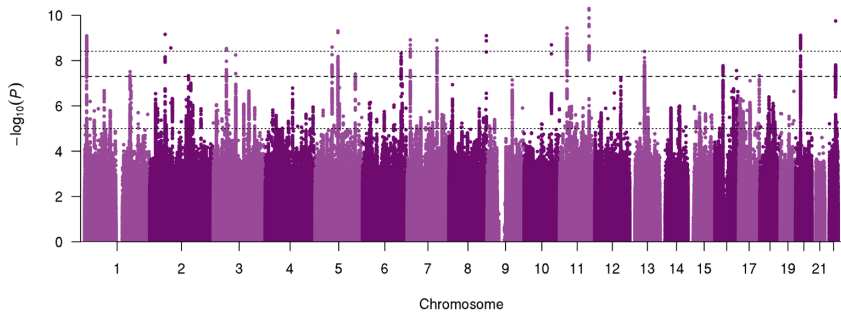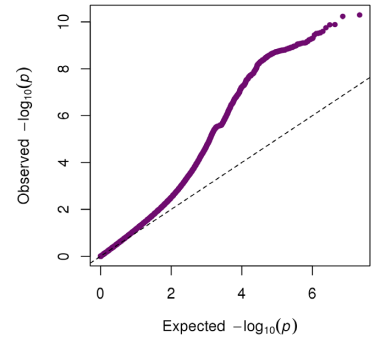

SUF-NERV - Do you suffer from 'nerves'?

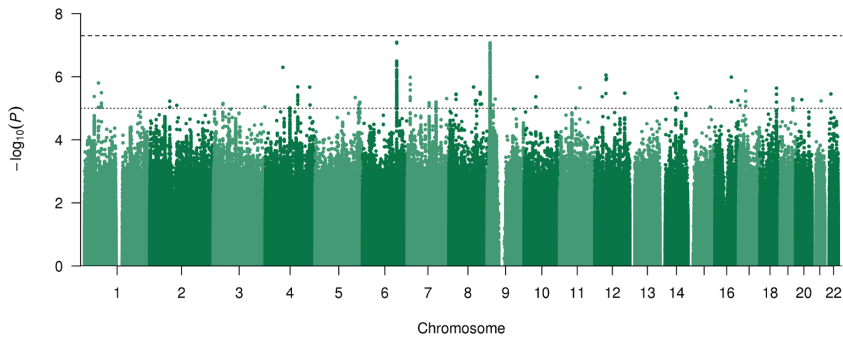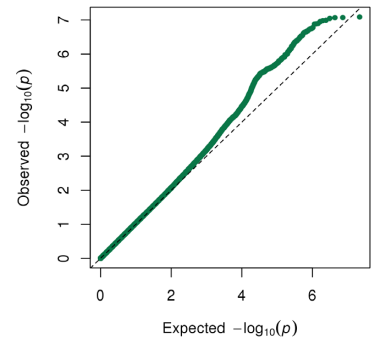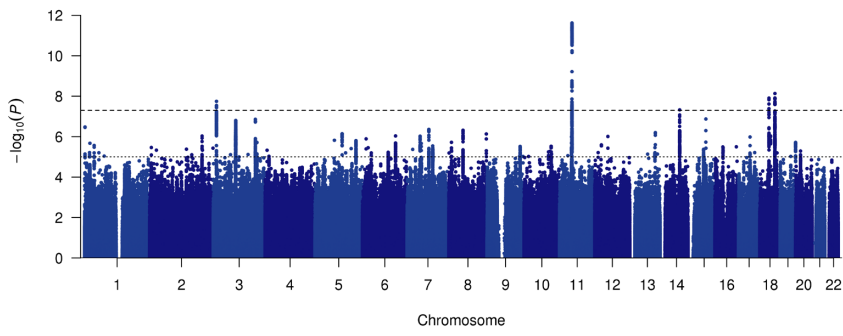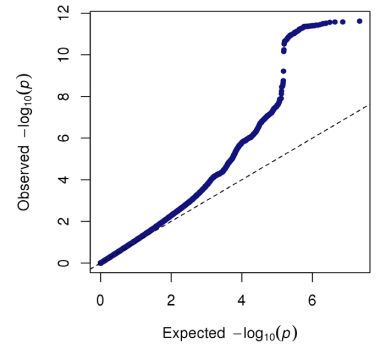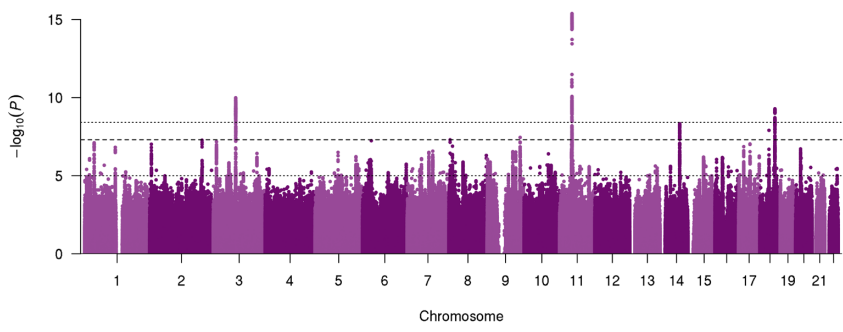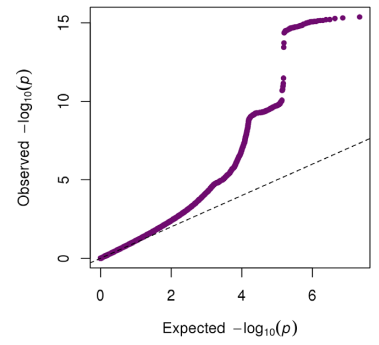

### HURT - Are your feelings easily hurt?

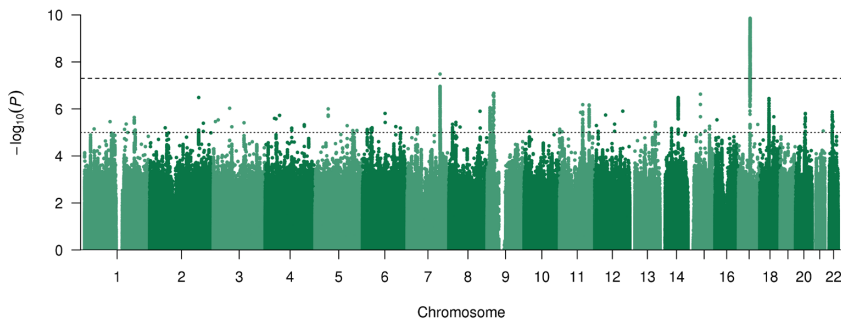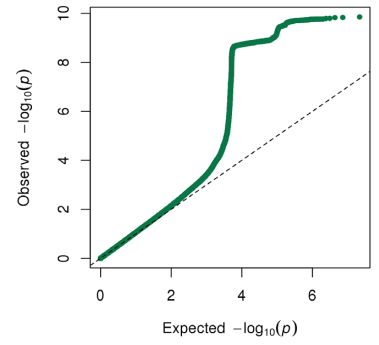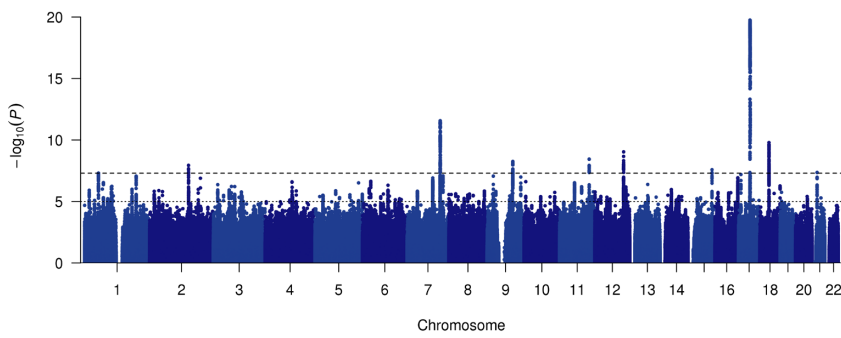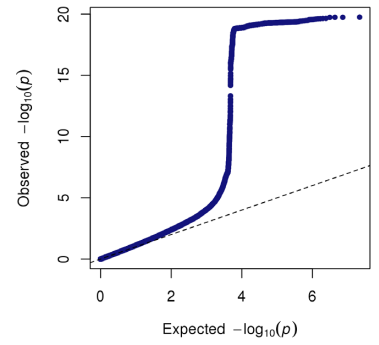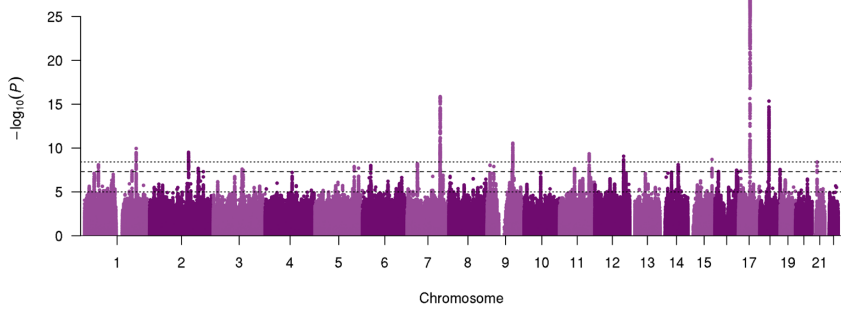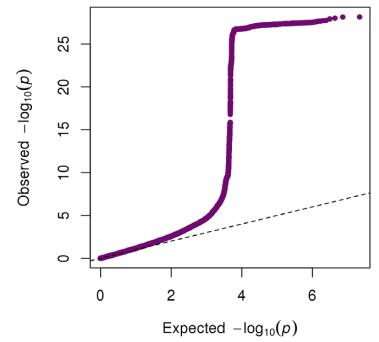



WORR-EMB - Do you worry too long after an embarrassing experience?

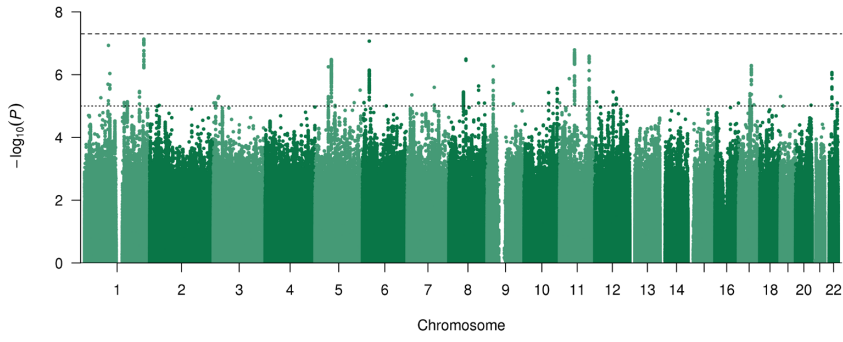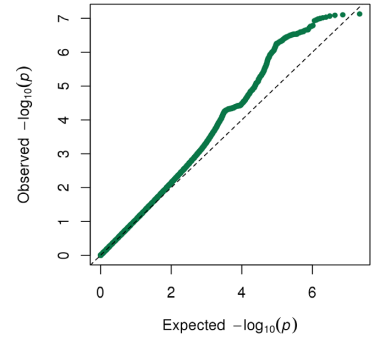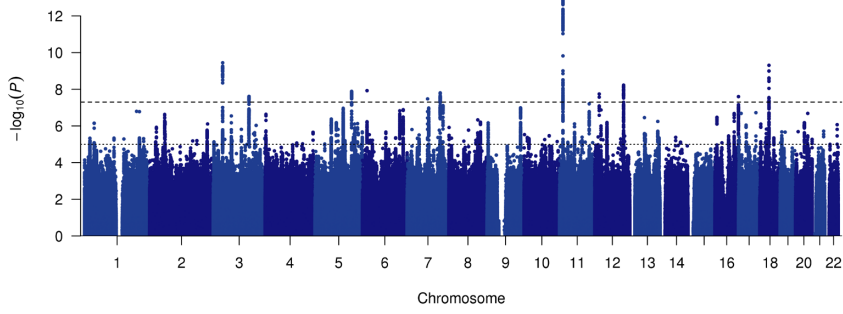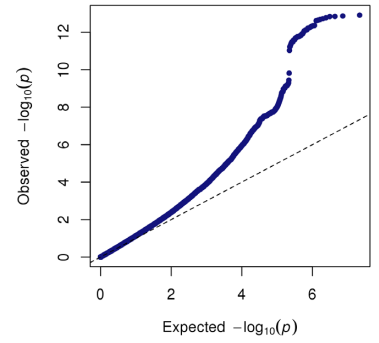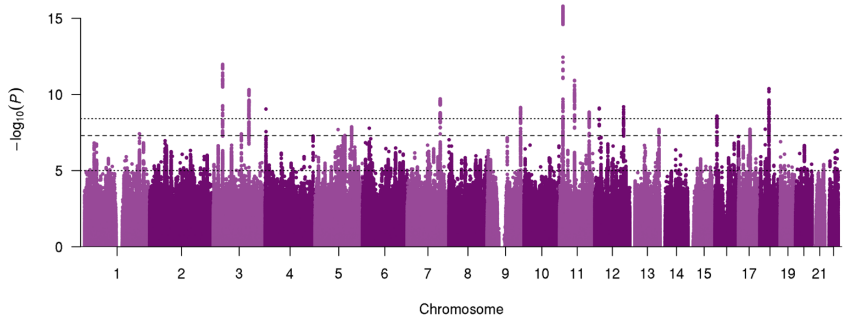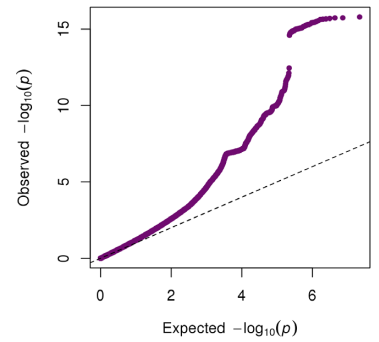

### GUILT - Are you often troubled by feelings of guilt?

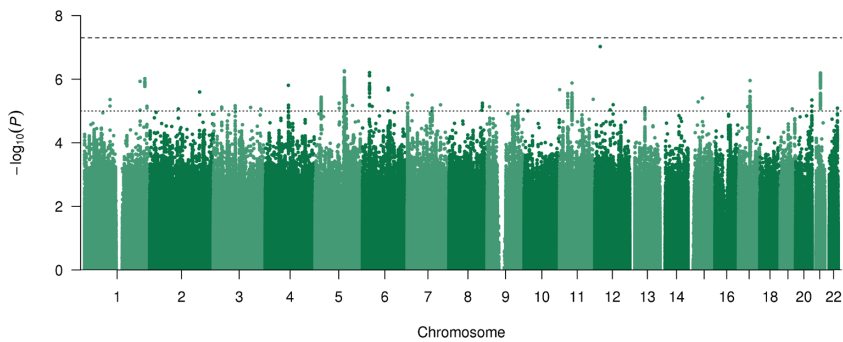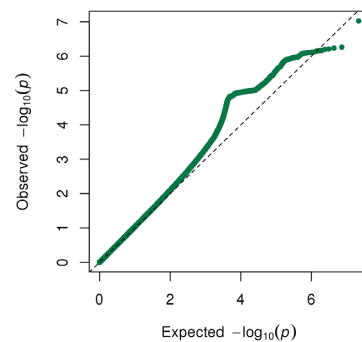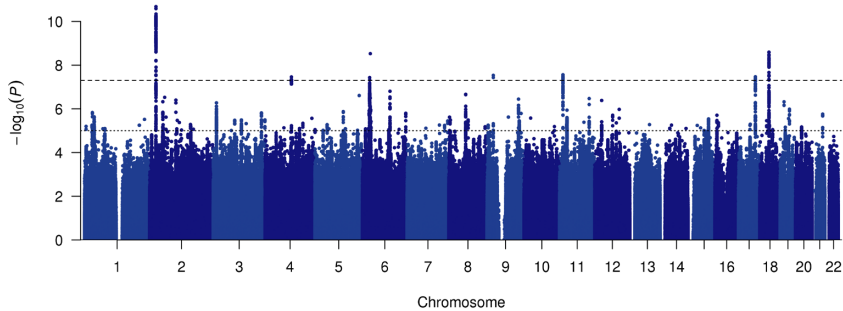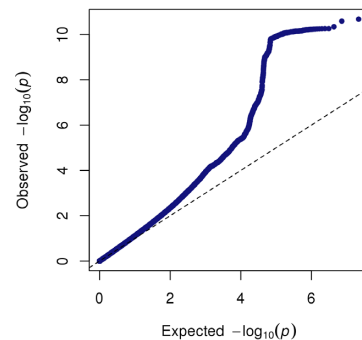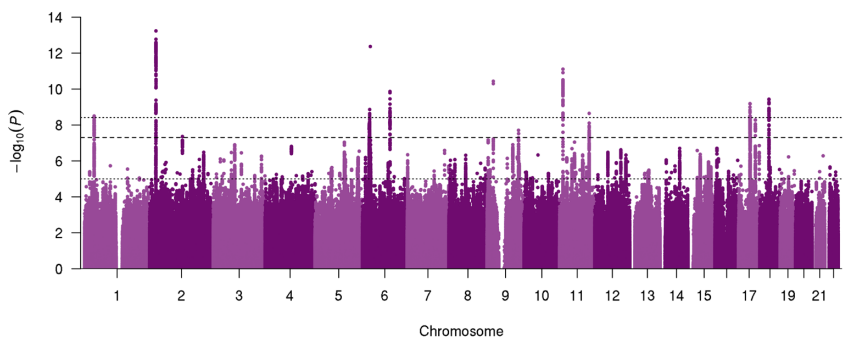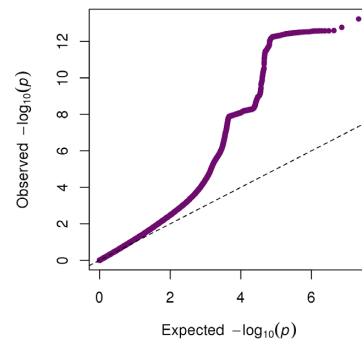

SUM-SCORE - Neuroticism sum-score

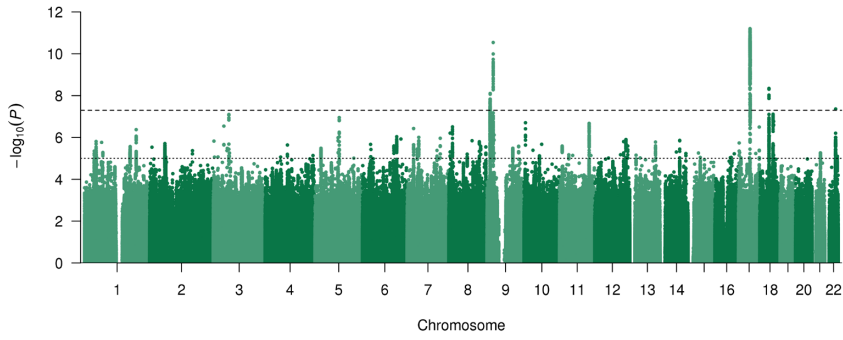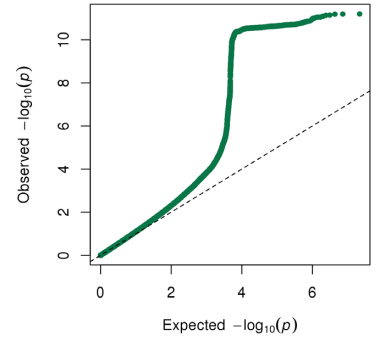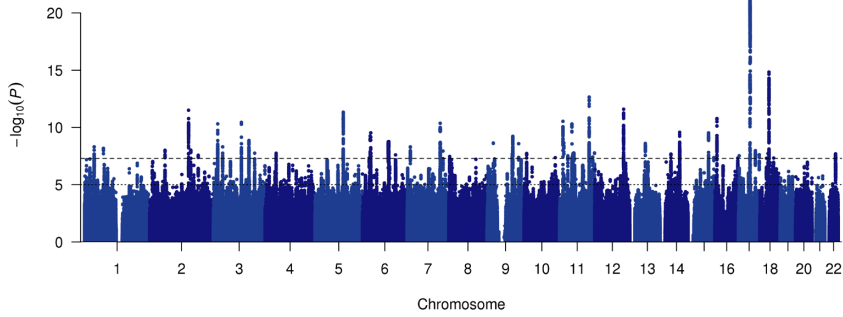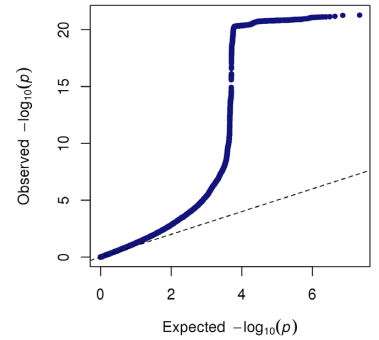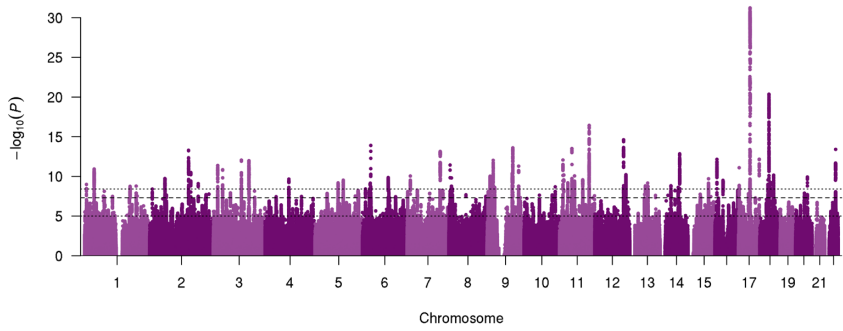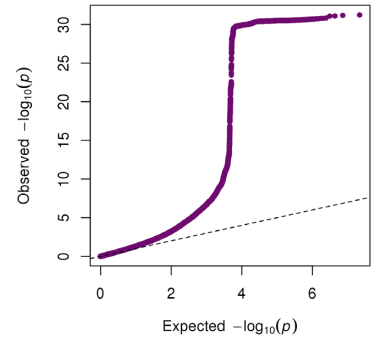

**Supplementary Figure 4. Manhattan and quantile-quantile (Q-Q) plots of the SNP-based association results for the 12 individual items and the neuroticism sum-score.**

SNP association results from the GWAS on the 12 neuroticism items and the sum-score in sample 1 (green), sample 2 (blue) and the meta-analysis (purple), respectively. Each dot represents a SNP. The  $y$ -axis shows the  $-\log_{10} P$  values and the  $x$ -axis the chromosomal position of a given SNP. Dashed lines indicate genome-wide significance ( $P < 5 \times 10^{-8}$ ) and dotted lines indicate the ‘suggestive’ significance threshold ( $P < 1 \times 10^{-5}$ ). The upper dotted line in the Manhattan plots of the meta-analyses indicates a more stringent Bonferroni-corrected significance threshold, where we corrected for testing 13 phenotypes;  $P < 5 \times 10^{-8}/13$  ( $3.85 \times 10^{-9}$ ). See **Supplementary Table 1** for an explanation of item labels.

rs753528

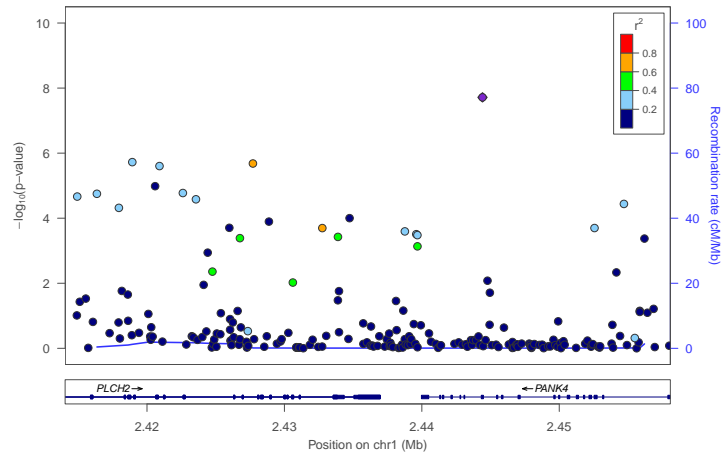

rs4411173

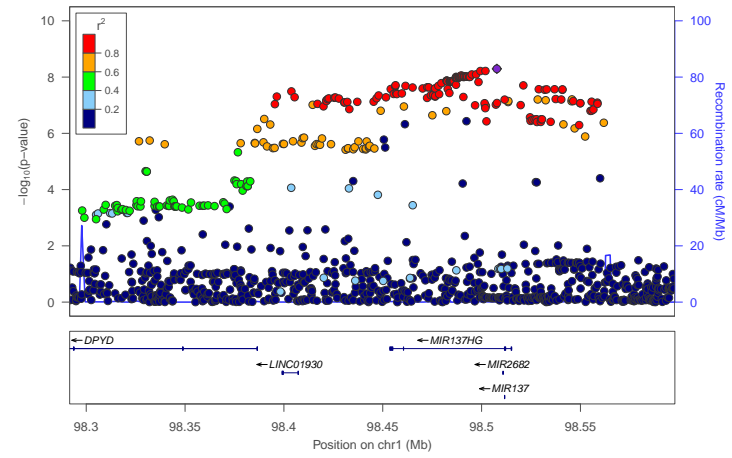

rs4953152

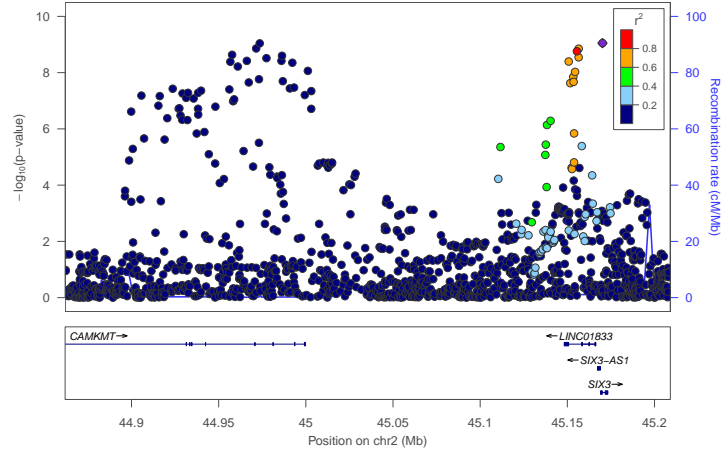

rs11682175

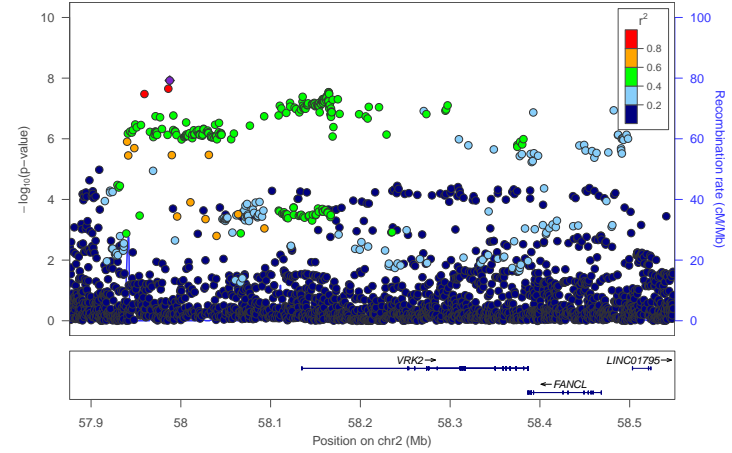

rs6718682

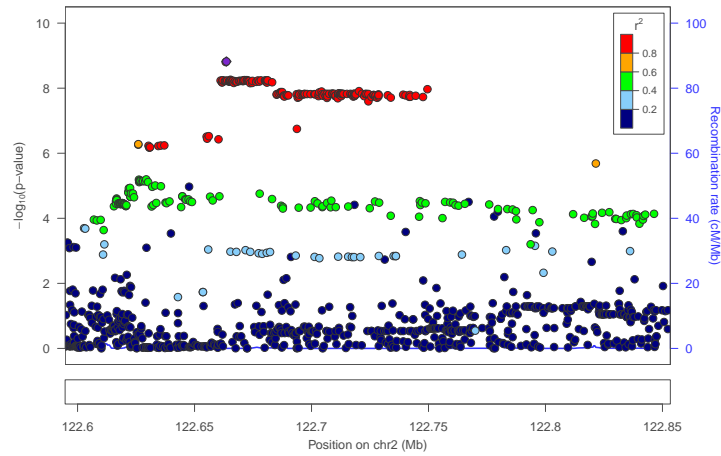

rs6711058

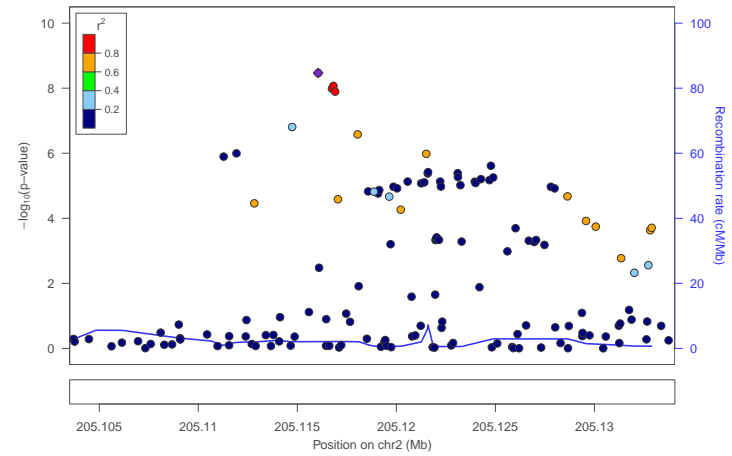

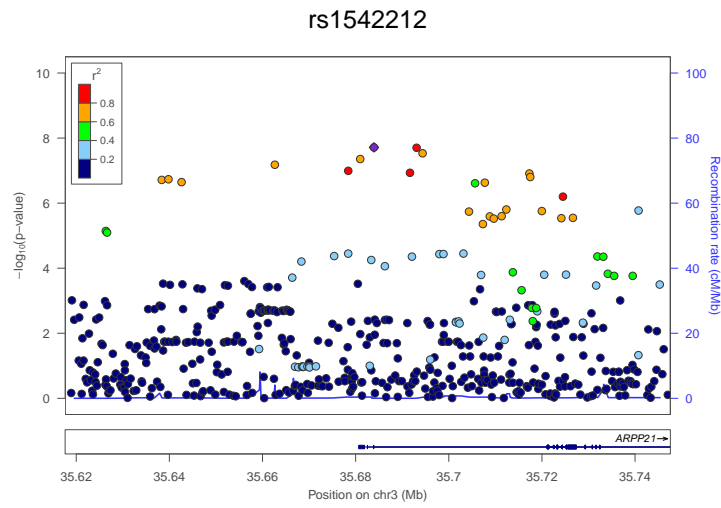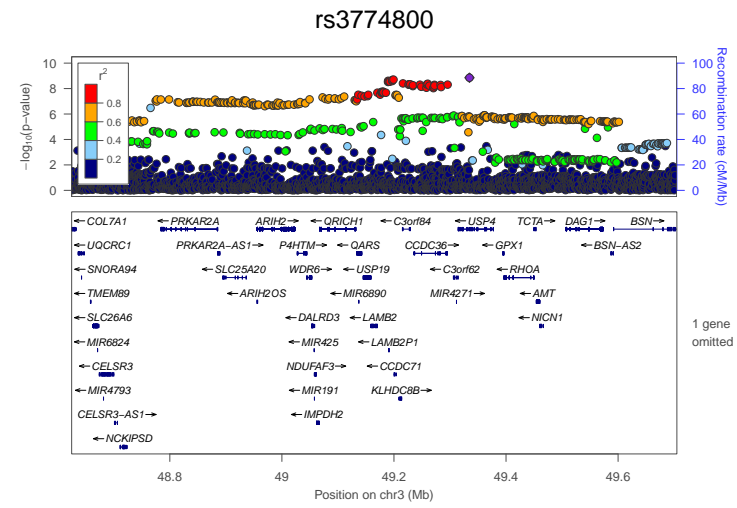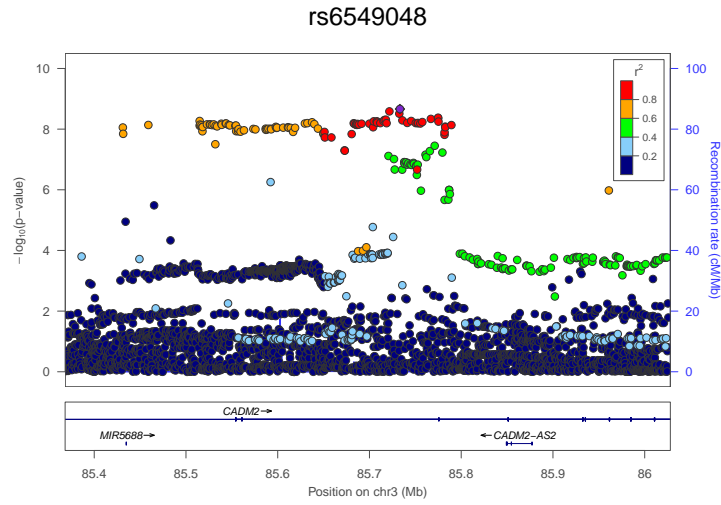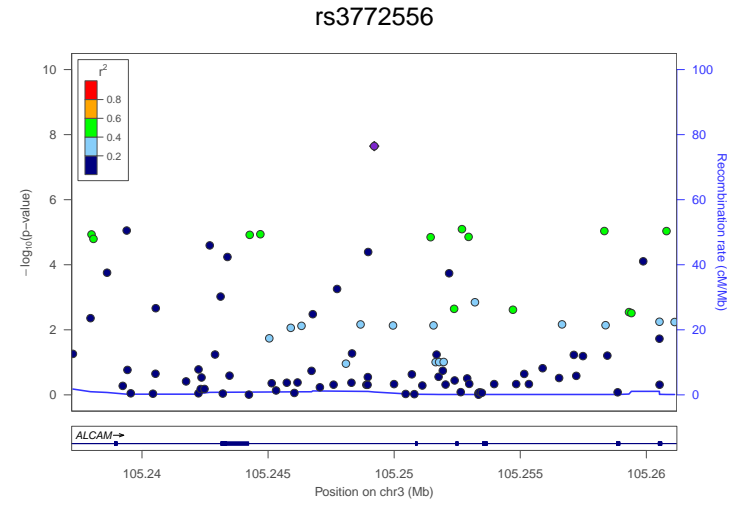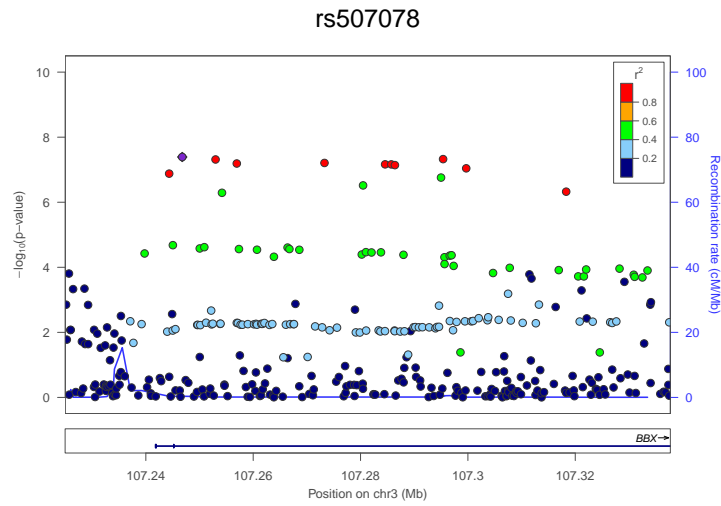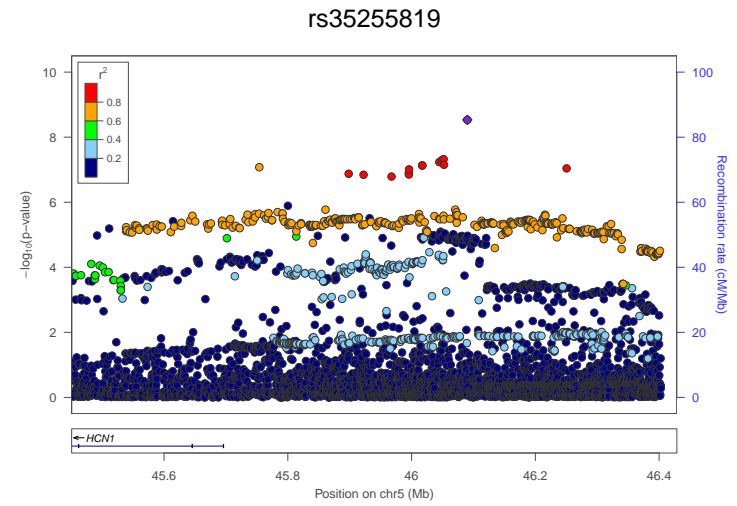

rs1422192

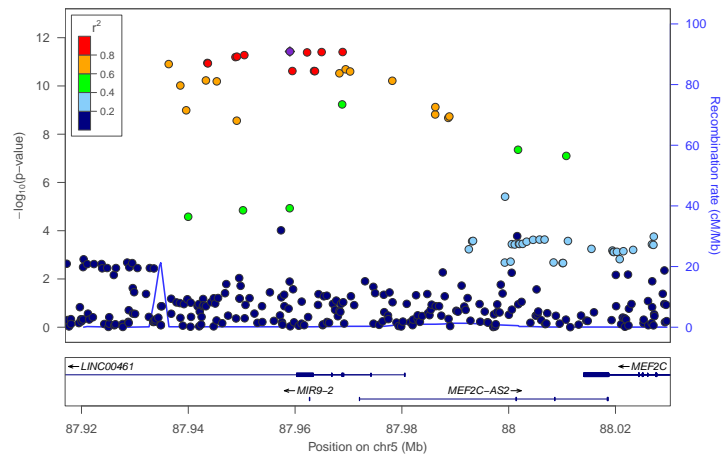

rs6596771

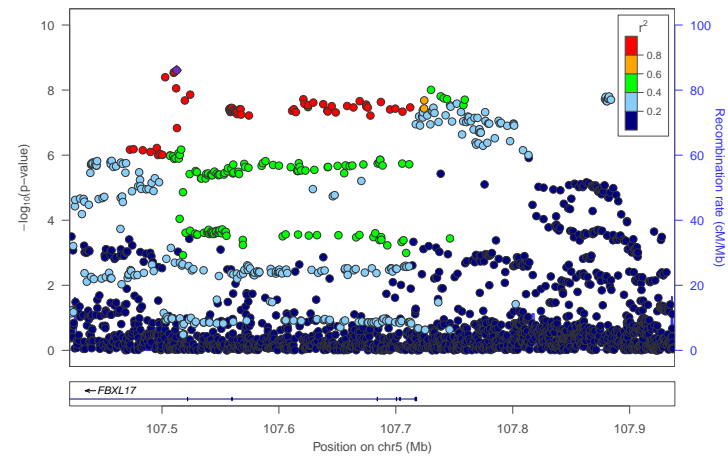

rs9403716

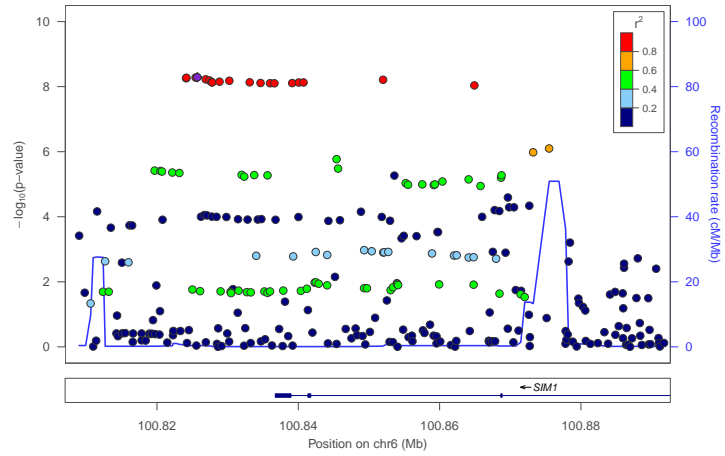

rs13223152

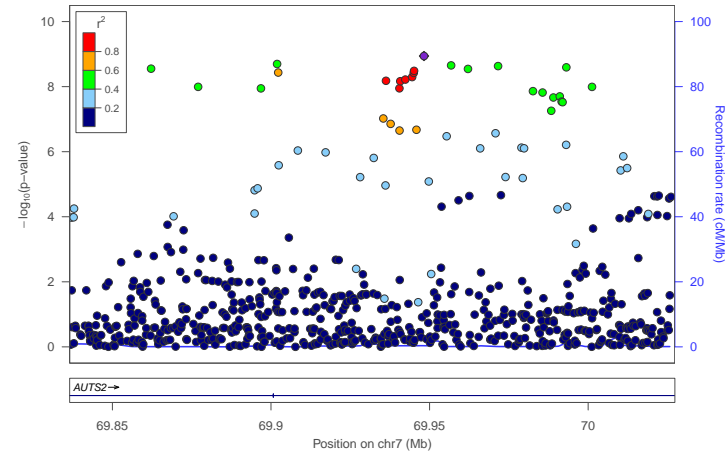

rs10228350

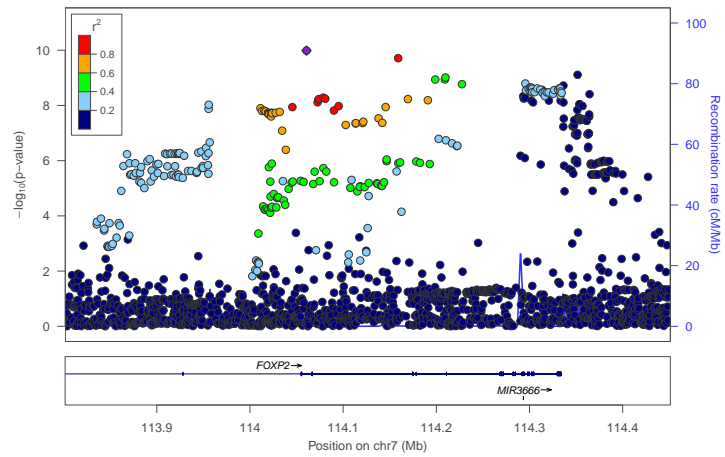

rs17151565

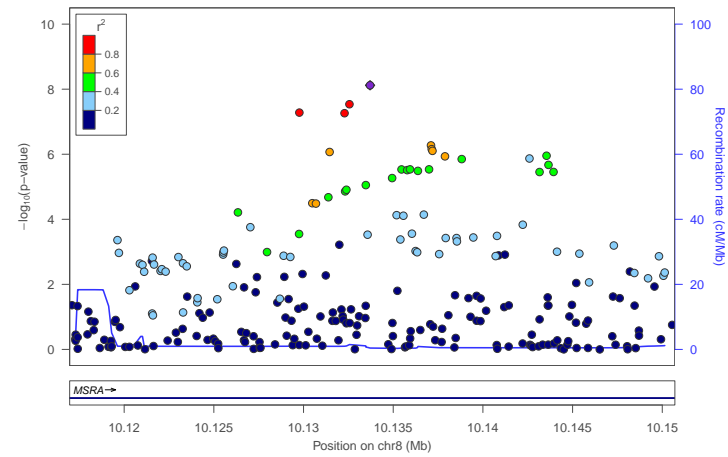

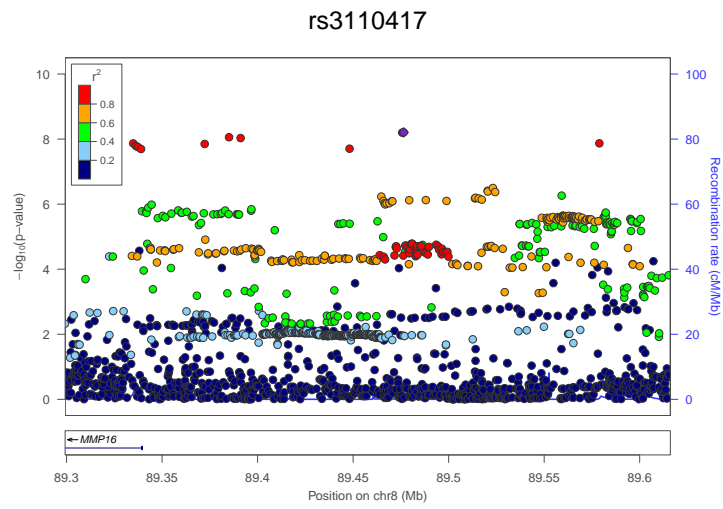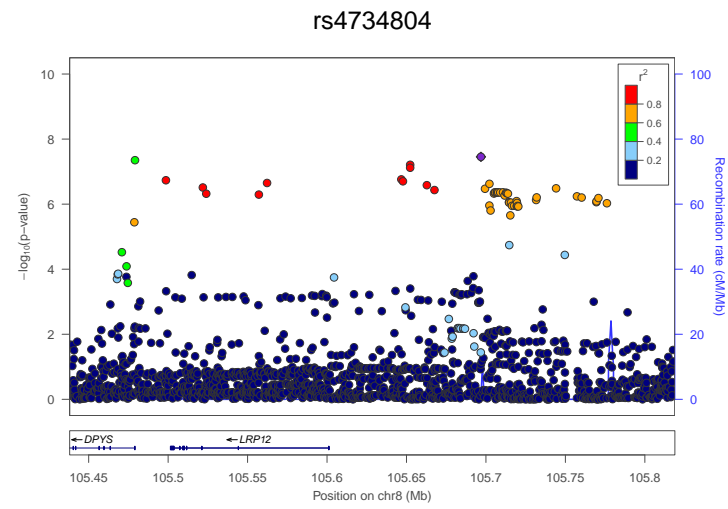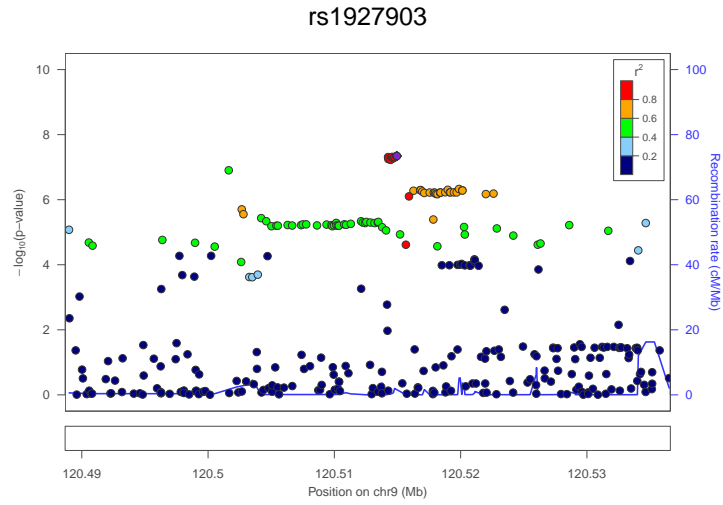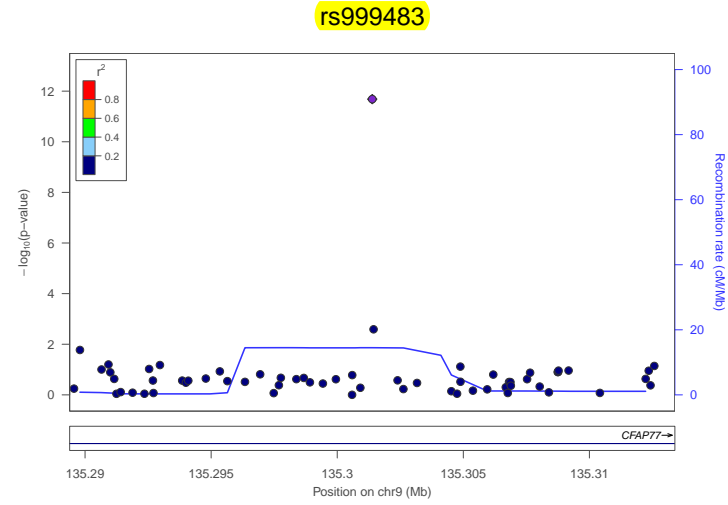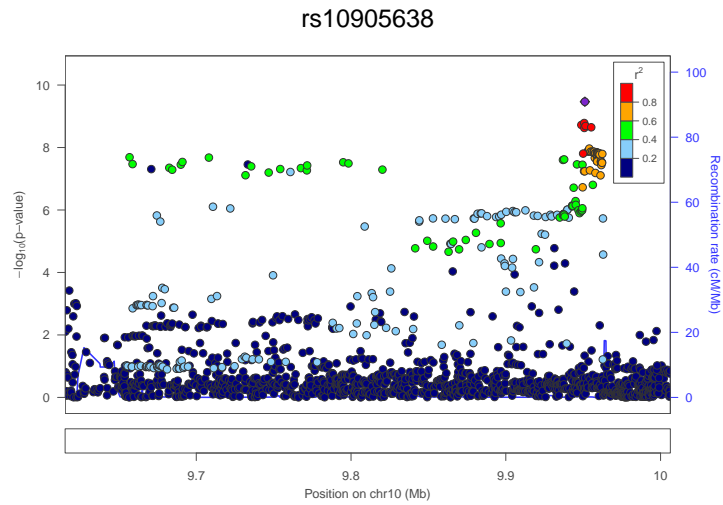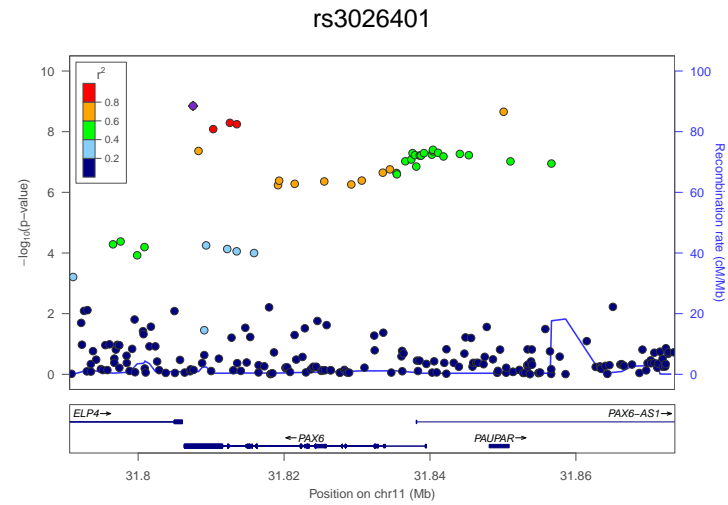



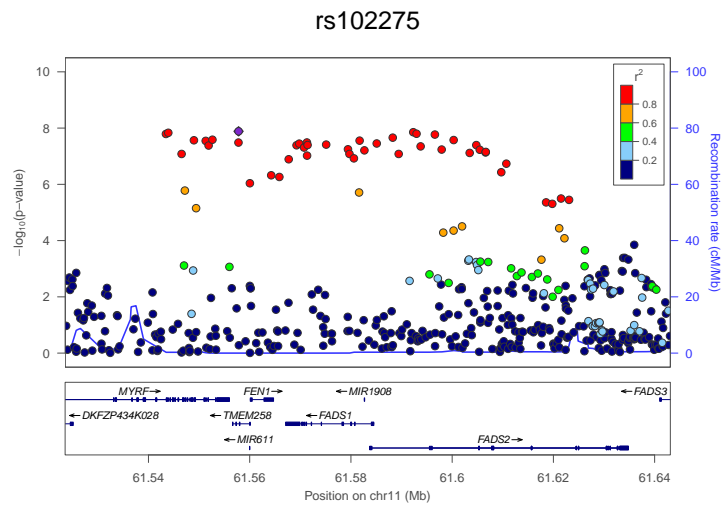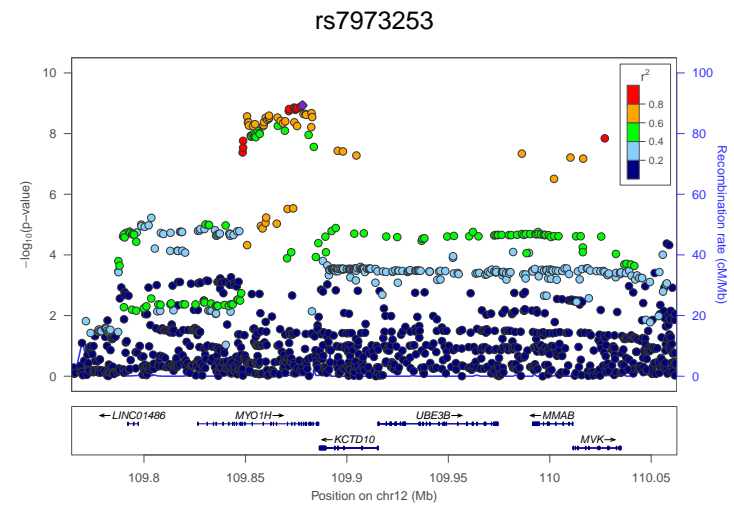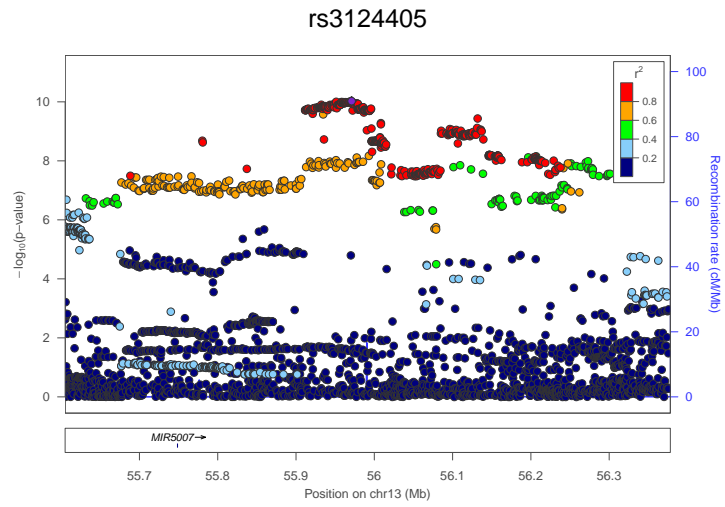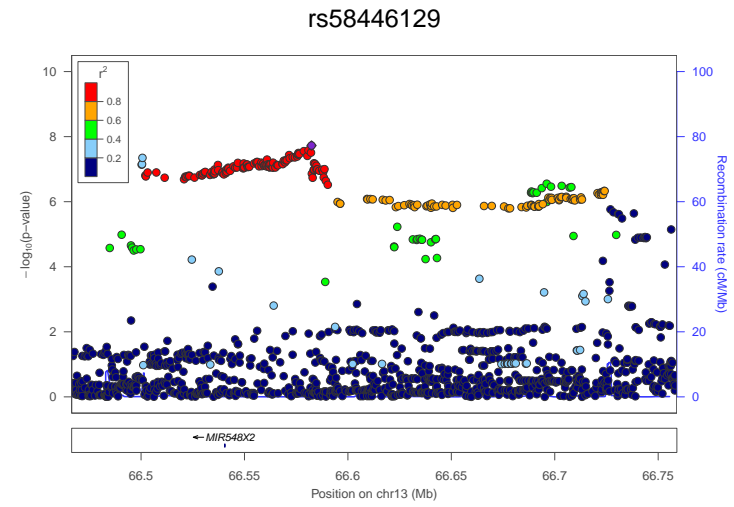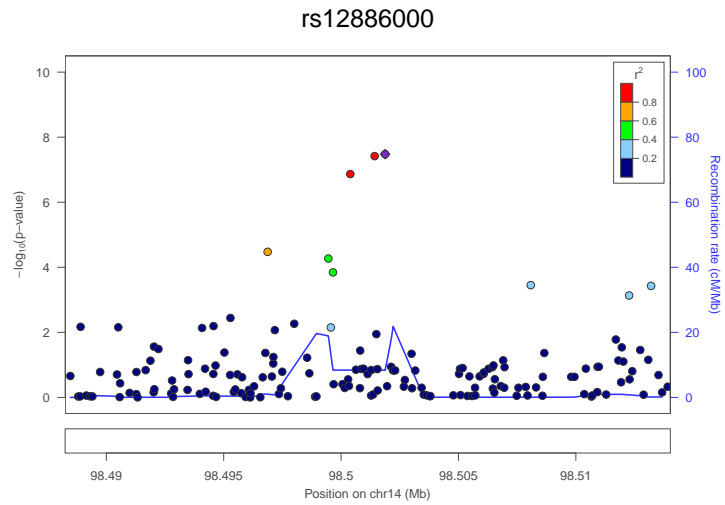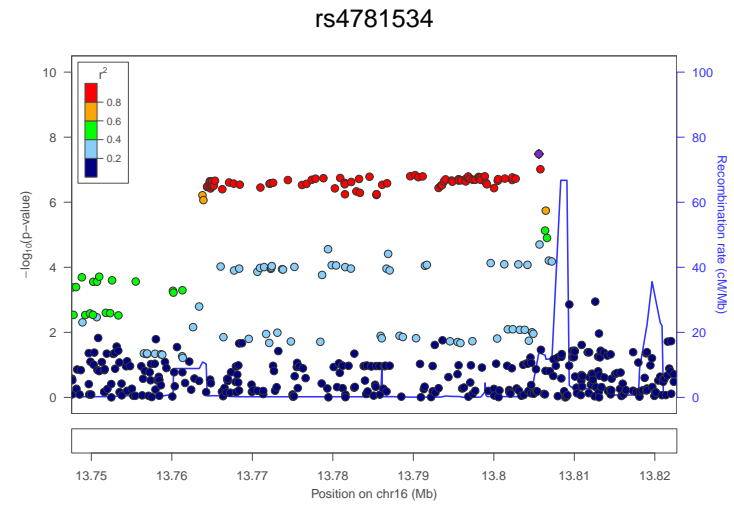

rs9938550

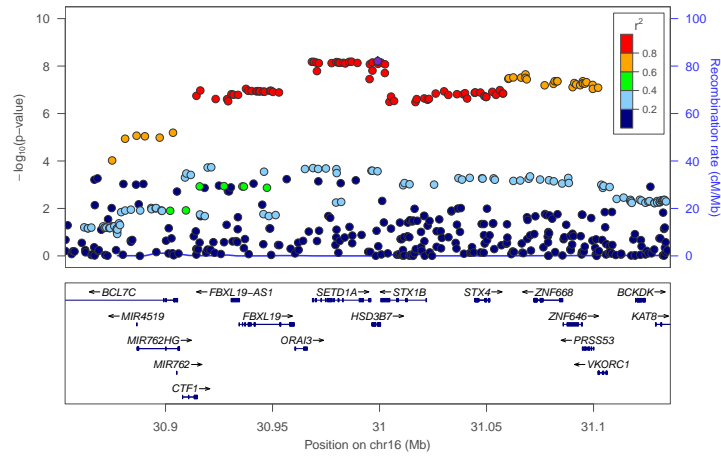

rs9630740

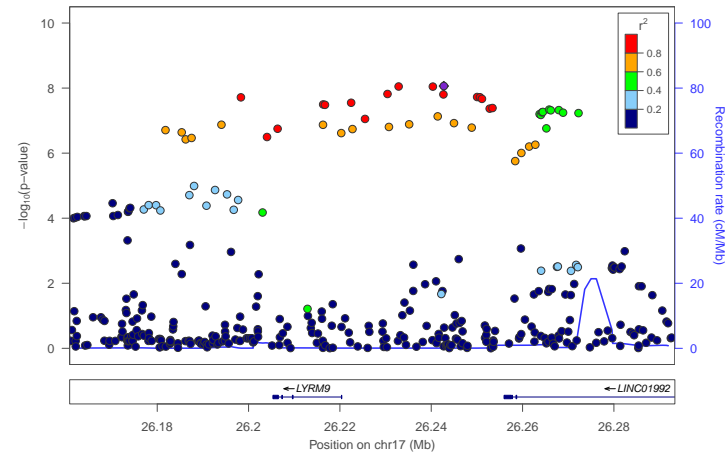

rs2106785

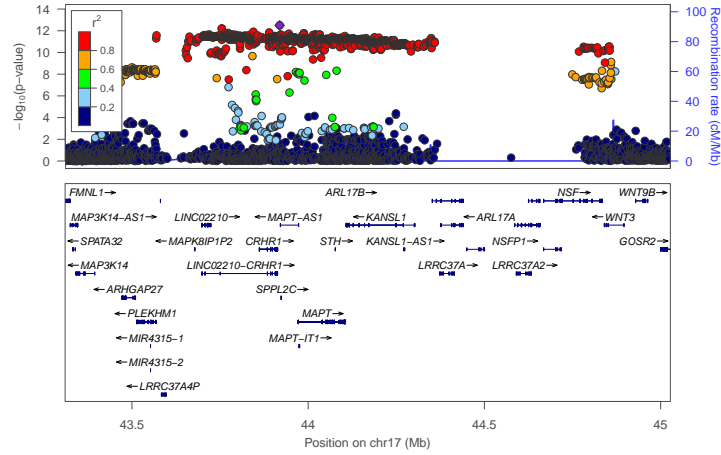

rs2217127

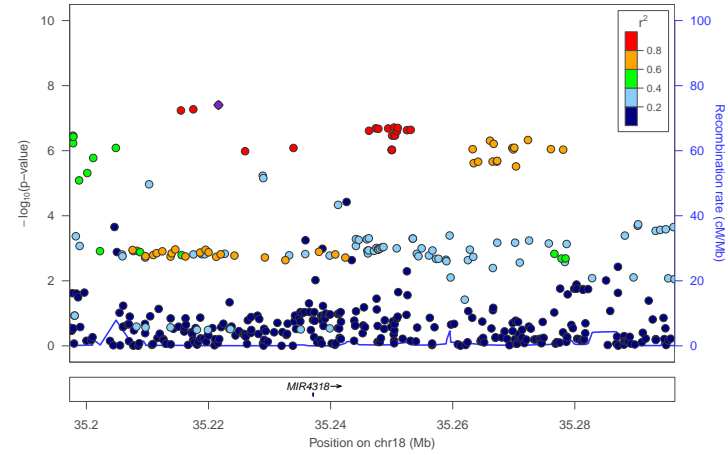

rs7231748

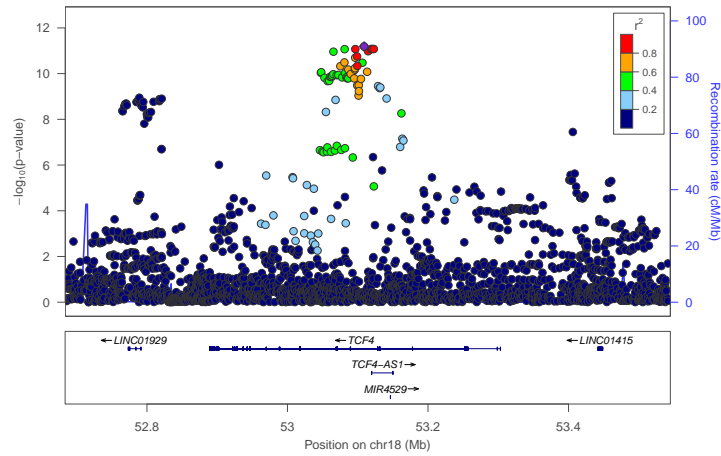

rs2587410

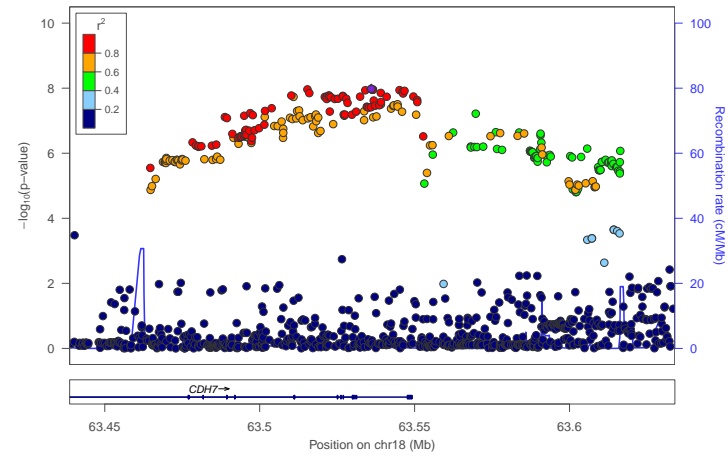

rs62211616

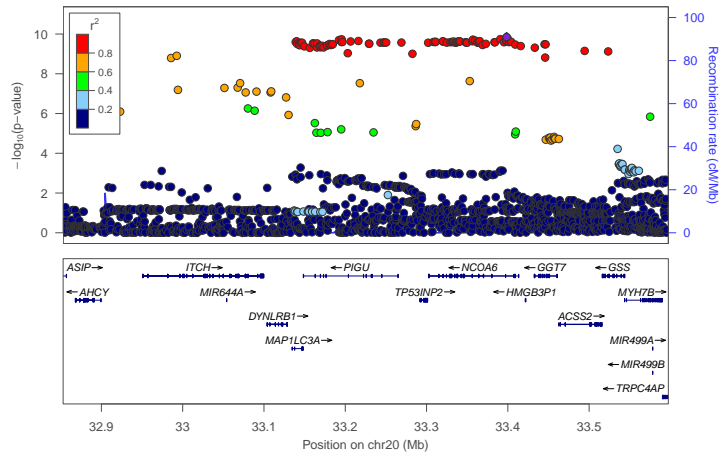

rs4820434

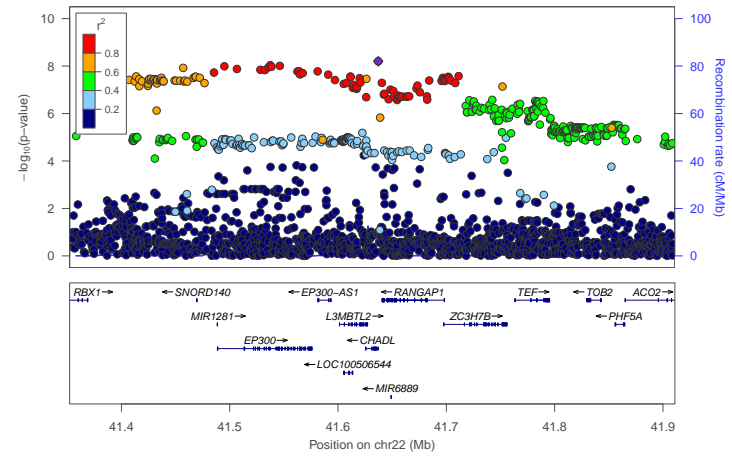

### **Supplementary Figure 5. Regional plots of GWA analyses of item IRR.**

The  $y$ -axis represents the negative logarithm (base 10) of the SNP  $P$  value and the  $x$ -axis the position on the chromosome, with the name and location of genes in the UCSC Genome Browser in the bottom panel. The SNP with the lowest  $P$  value in the region is marked by a purple diamond. The colors of the other SNPs indicate the  $r^2$  of these SNPs with the lead SNP, with grey color indicating SNPs below the user-defined  $r^2$ . Plots are generated with LocusZoom. See **Supplementary Data 2** for an overview of all lead SNPs for which a regional plot is presented above. For excluded loci (see **Methods; Supplementary Data 3-4**) the rsID's are marked yellow.

rs74338595

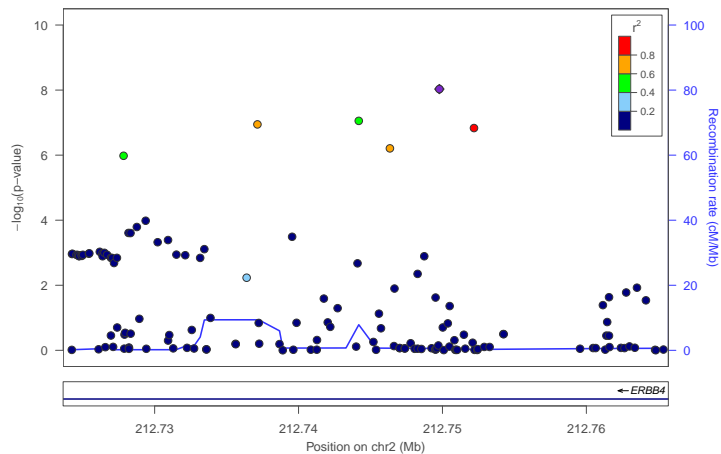

rs4958586

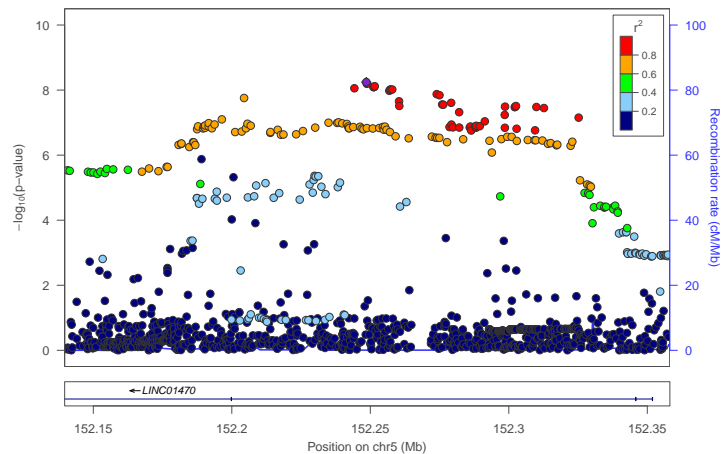

rs12554512

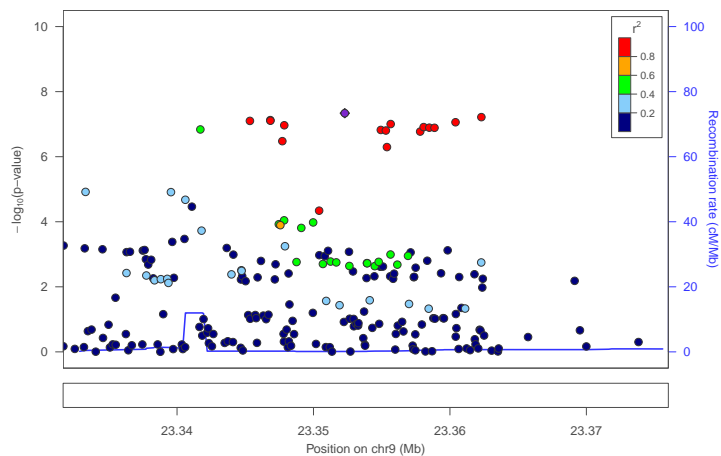

rs7044244

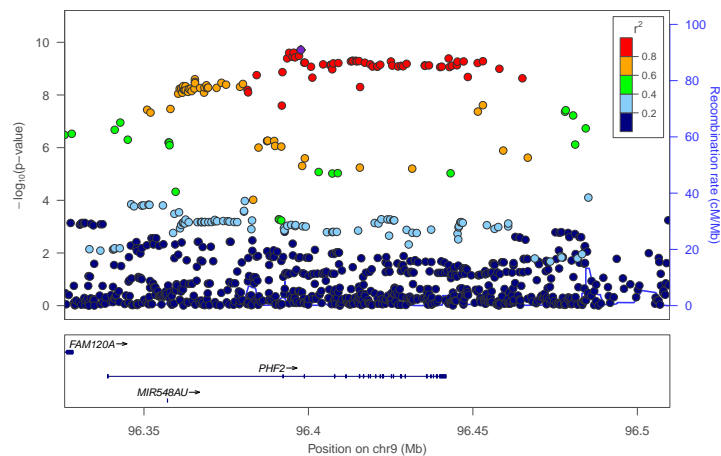

rs11039389

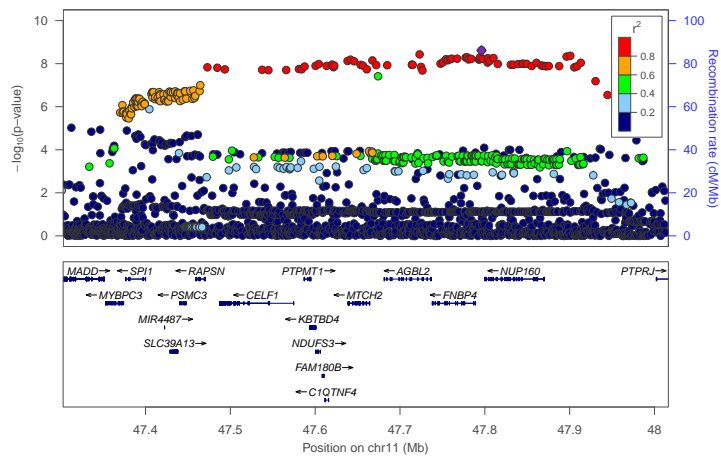

rs7209581

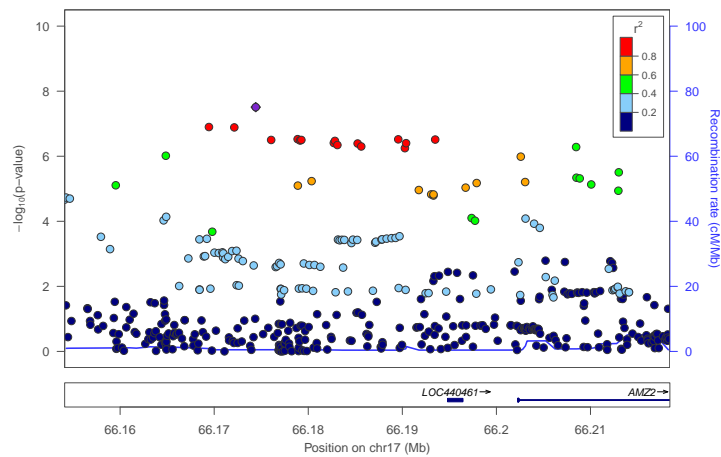

rs599550

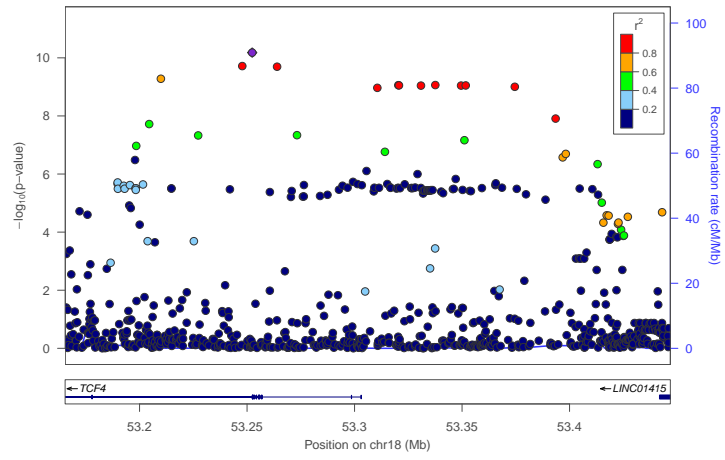

**Supplementary Figure 6. Regional plots of GWA analyses of item LONE.**

The  $y$ -axis represents the negative logarithm (base 10) of the SNP  $P$  value and the  $x$ -axis the position on the chromosome, with the name and location of genes in the UCSC Genome Browser in the bottom panel. The SNP with the lowest  $P$  value in the region is marked by a purple diamond. The colors of the other SNPs indicate the  $r^2$  of these SNPs with the lead SNP, with grey color indicating SNPs below the user-defined  $r^2$ . Plots are generated with LocusZoom. See **Supplementary Data 2** for an overview of all lead SNPs for which a regional plot is presented above.

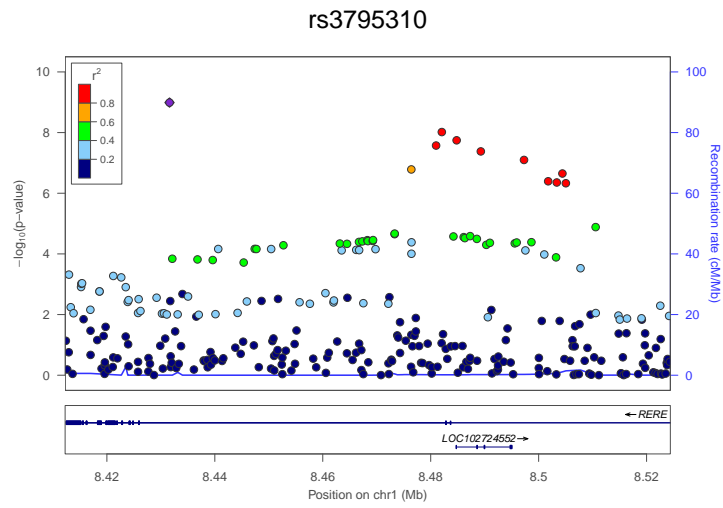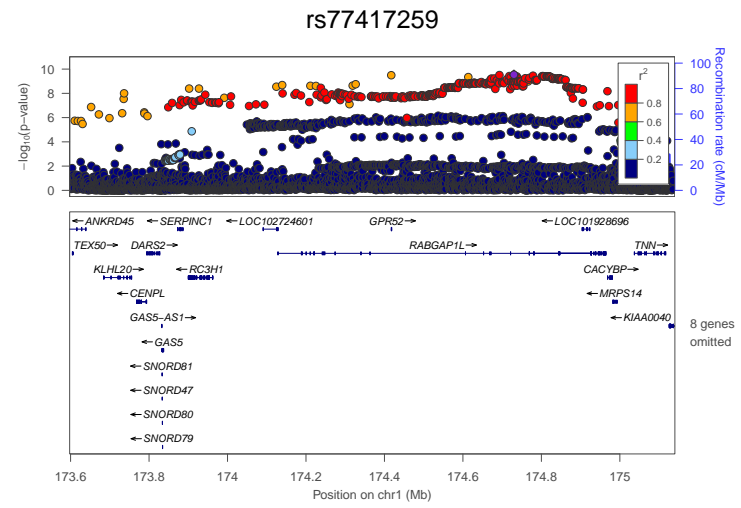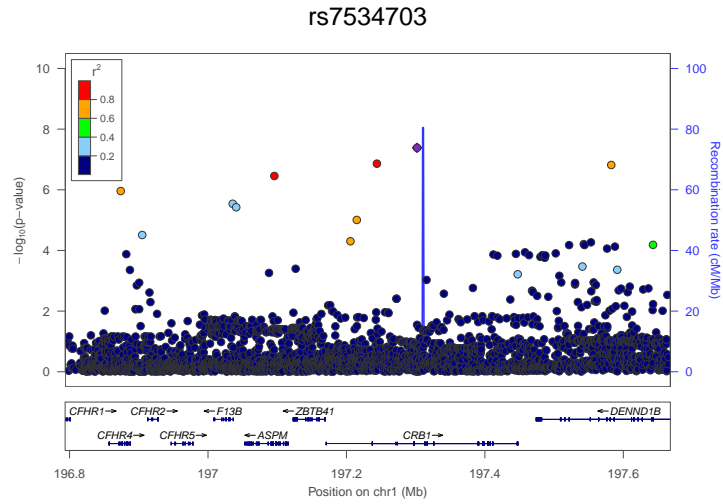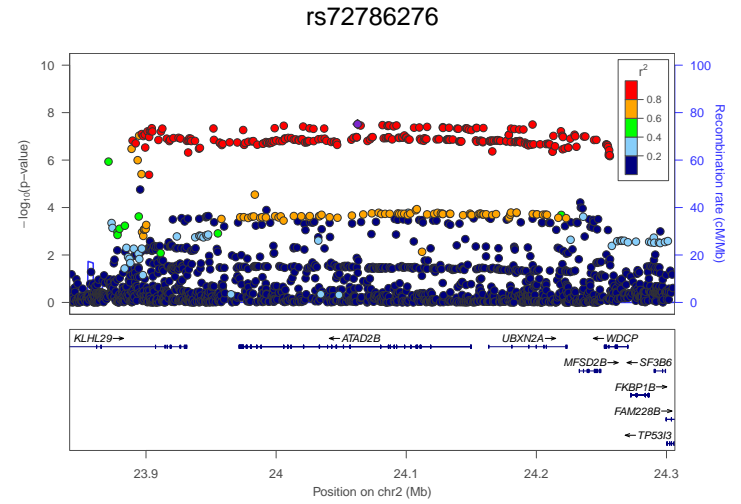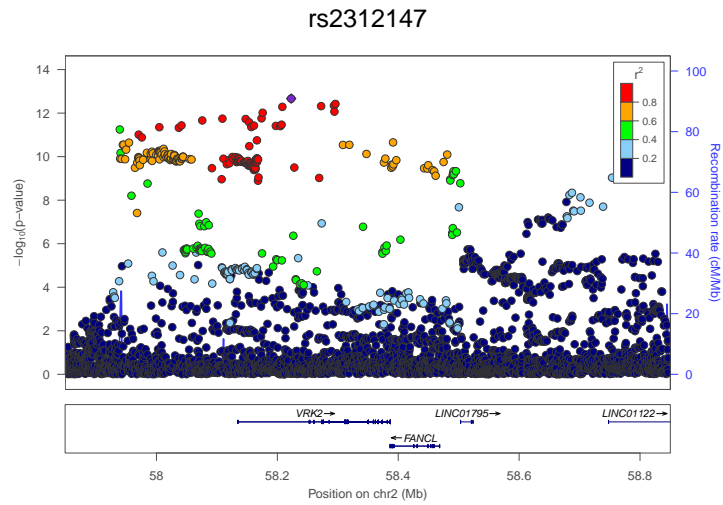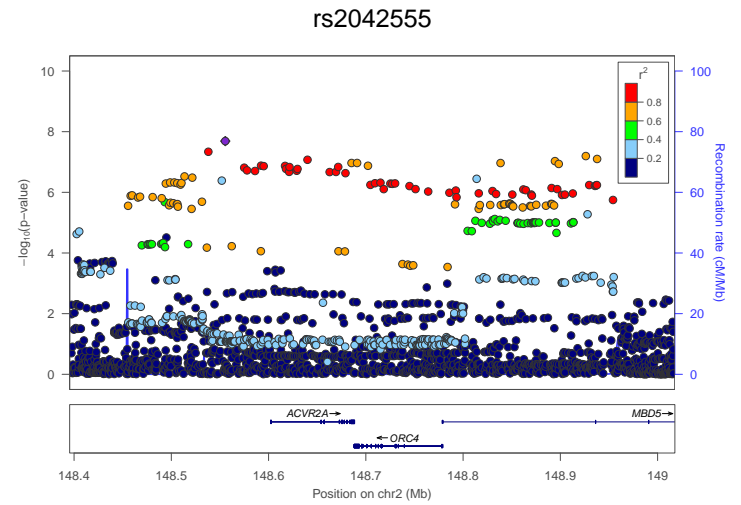



rs1994247

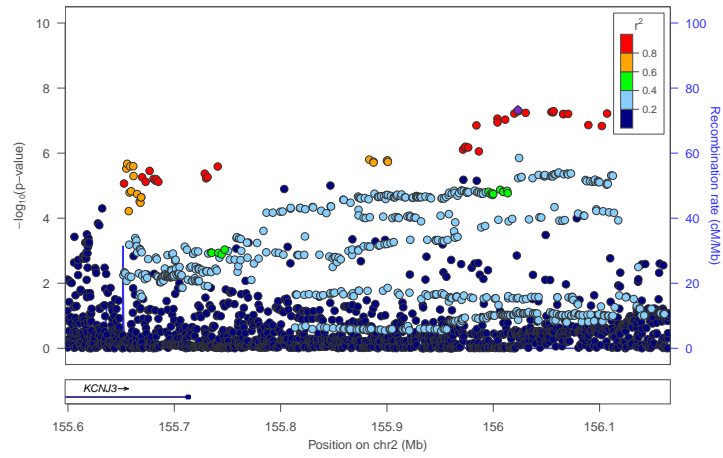

rs13018407

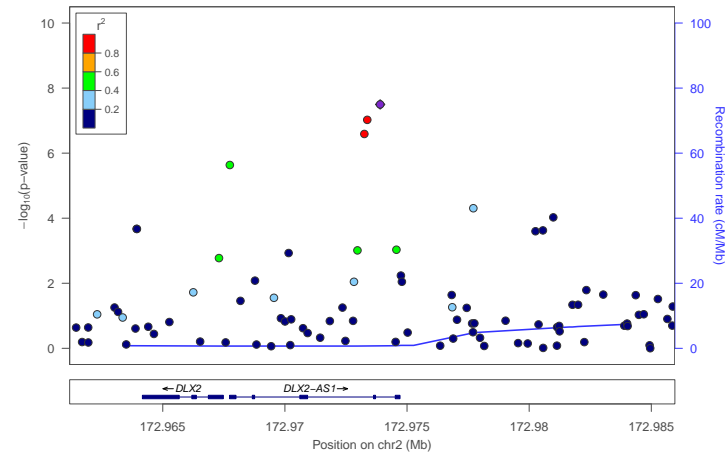

rs114306779

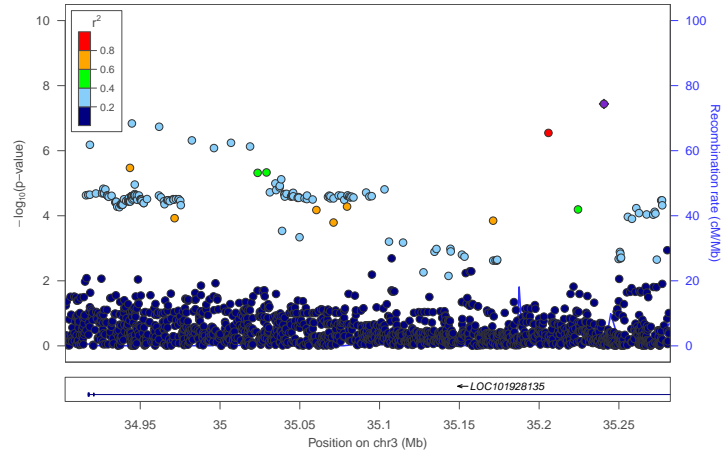

rs9586

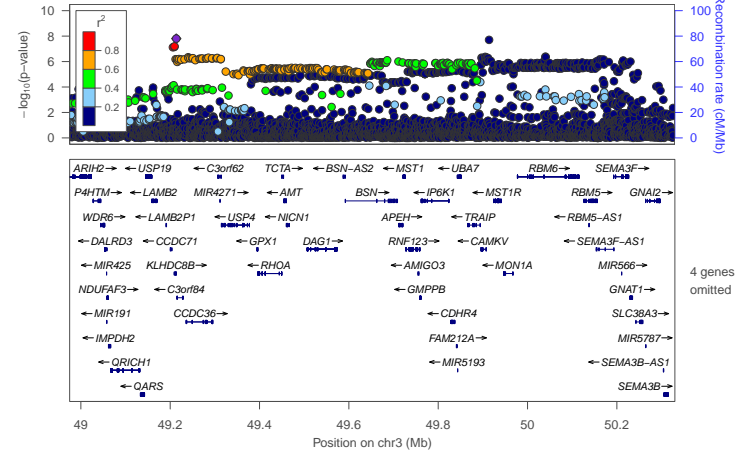

rs836927

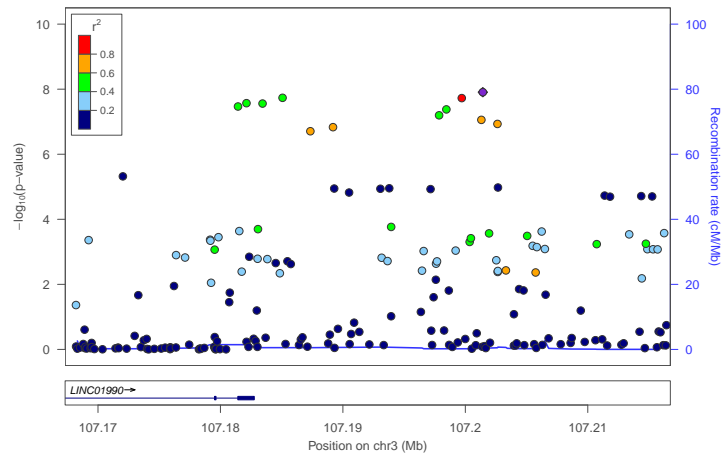

rs67932684

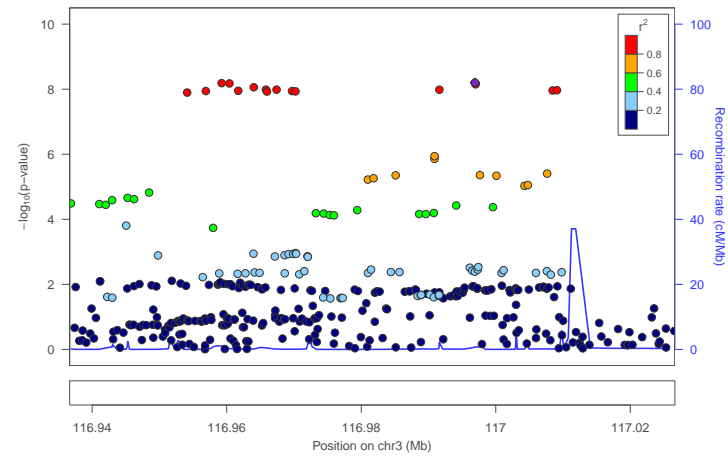

rs45510091

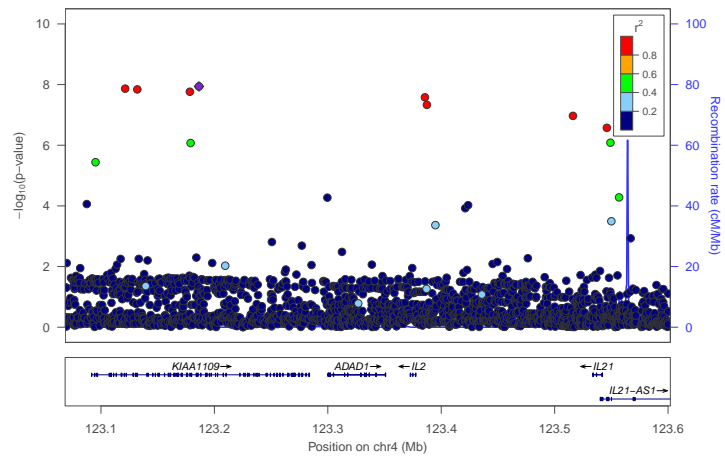

rs1422191

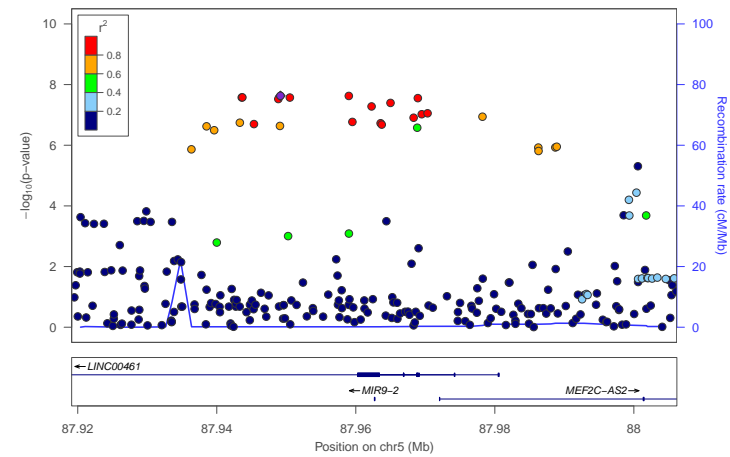

rs41286287

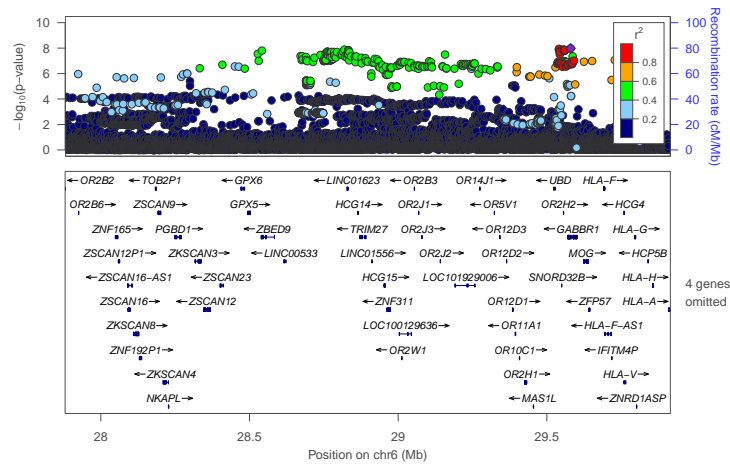

rs17192757

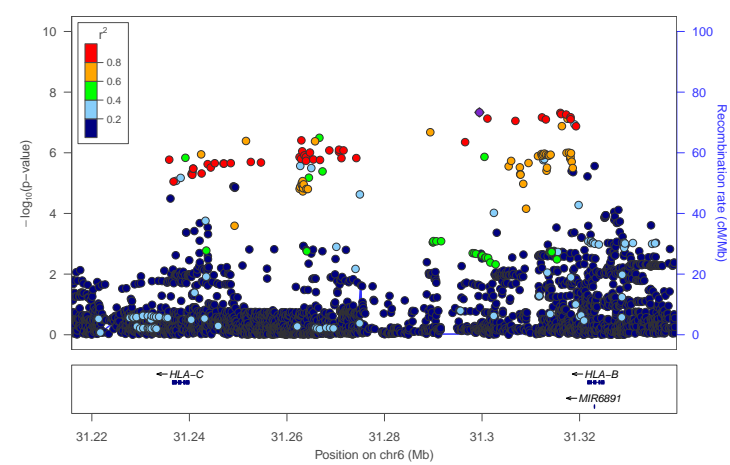

rs55893771

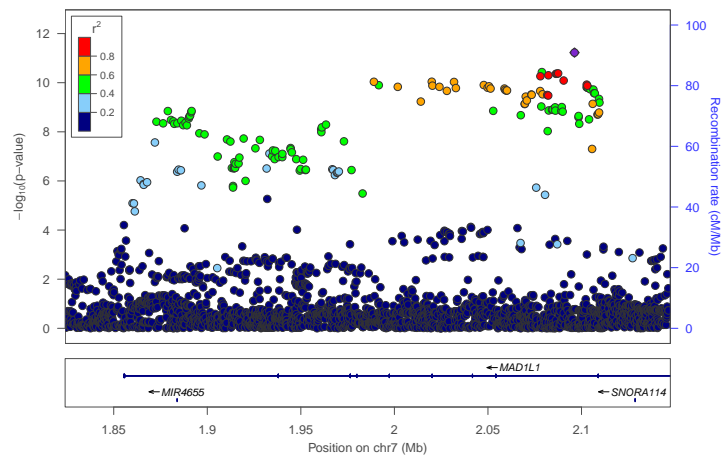

rs1971655

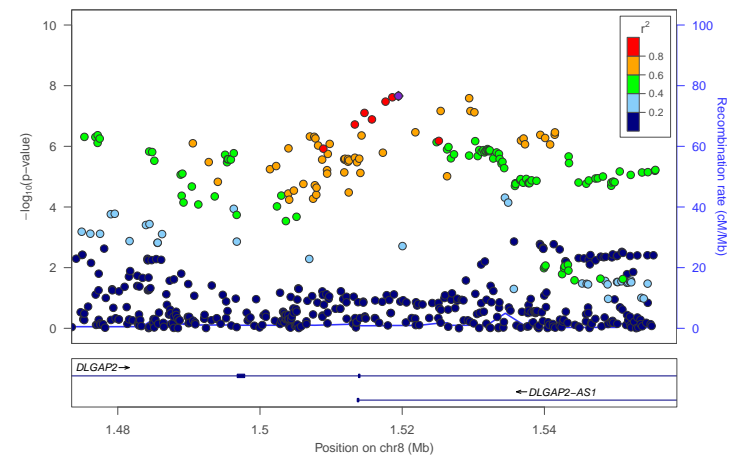

rs10156548

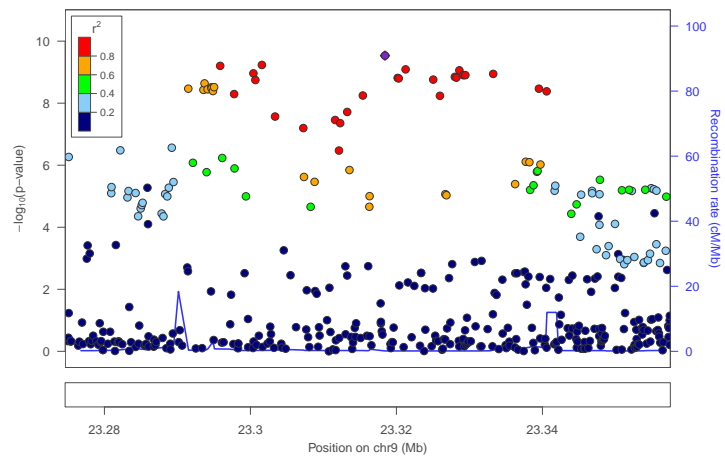

rs11599236

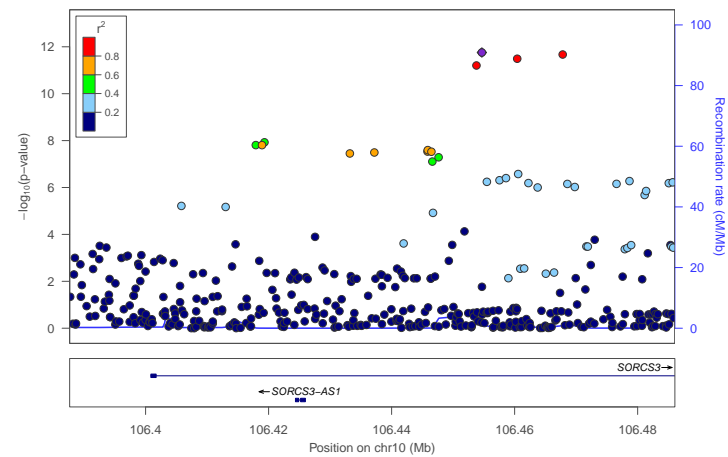

rs17805214

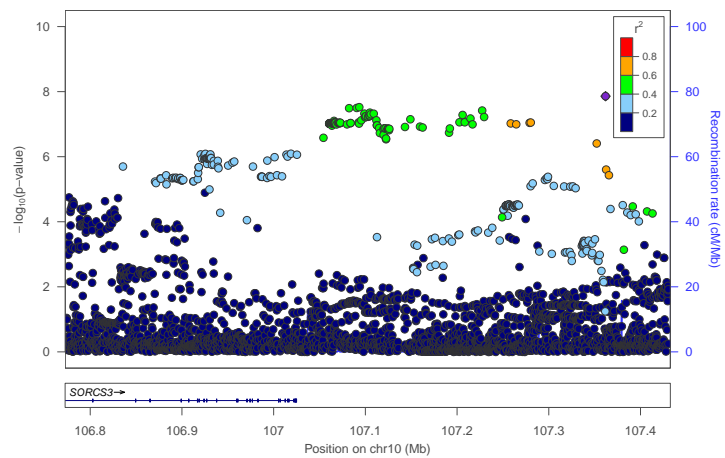

rs7912226

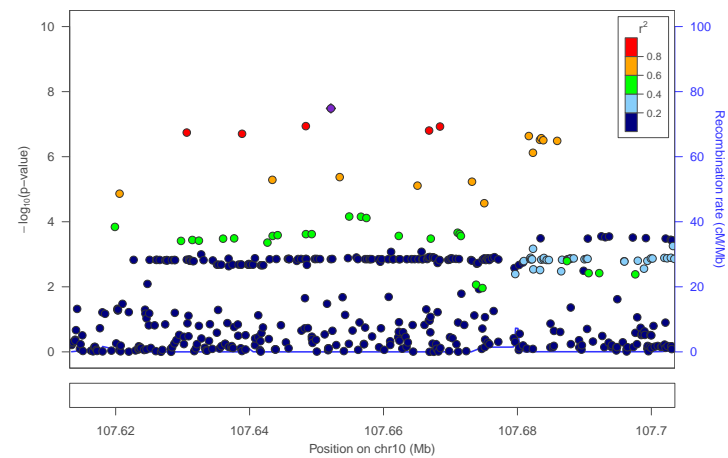

rs4757142

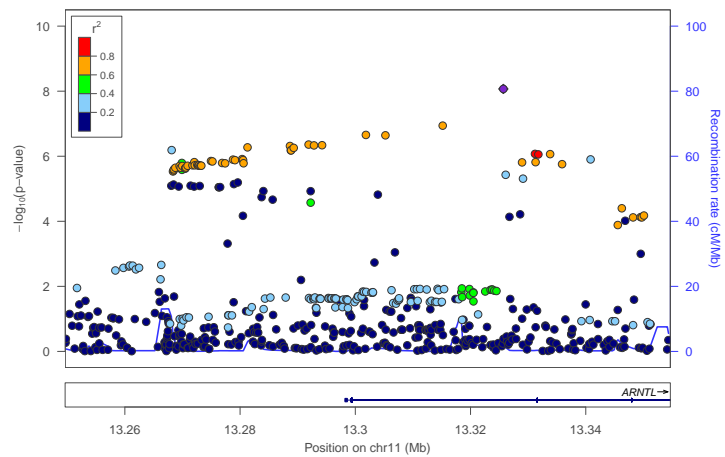

rs113829044

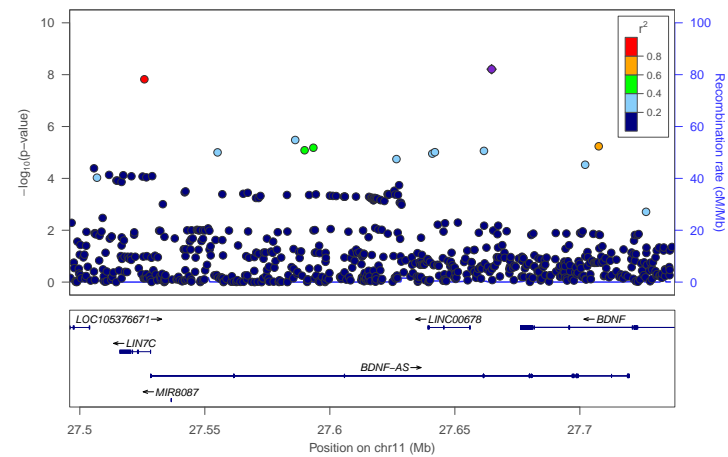

rs11039149

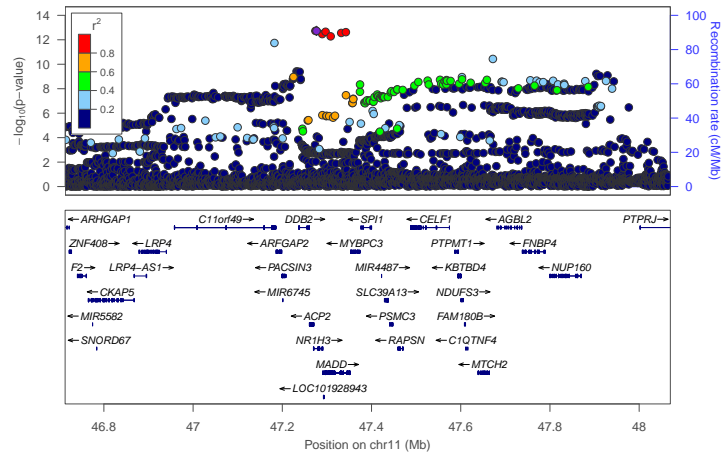

rs628246

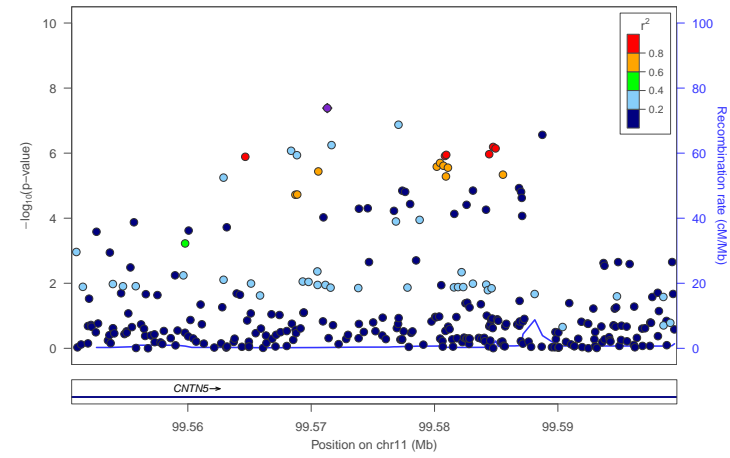

rs4424705

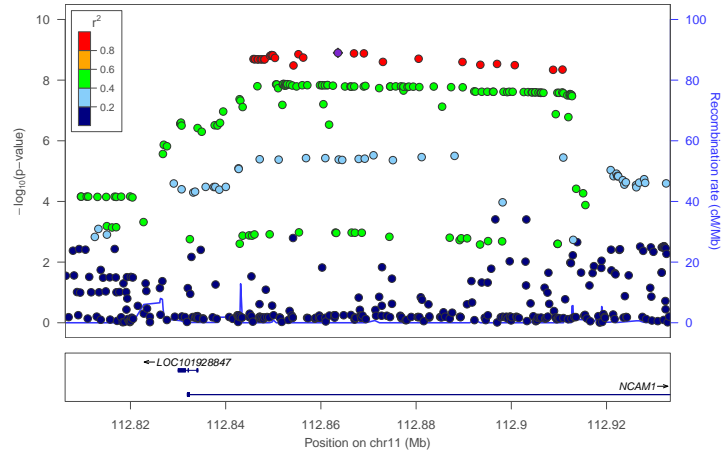

rs4245154

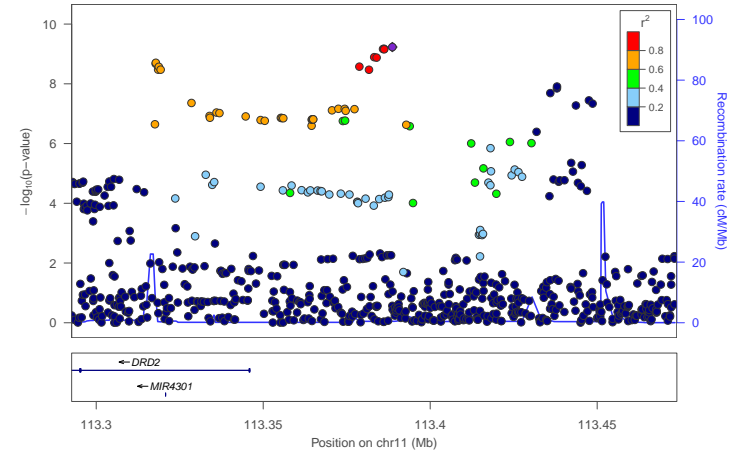

rs11608355

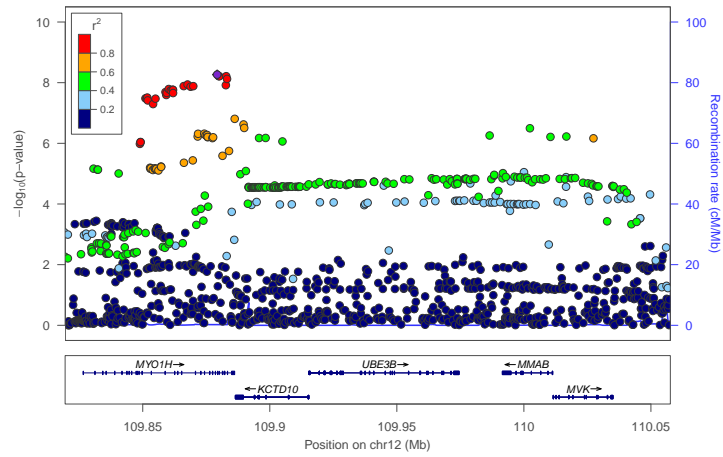

rs3936093

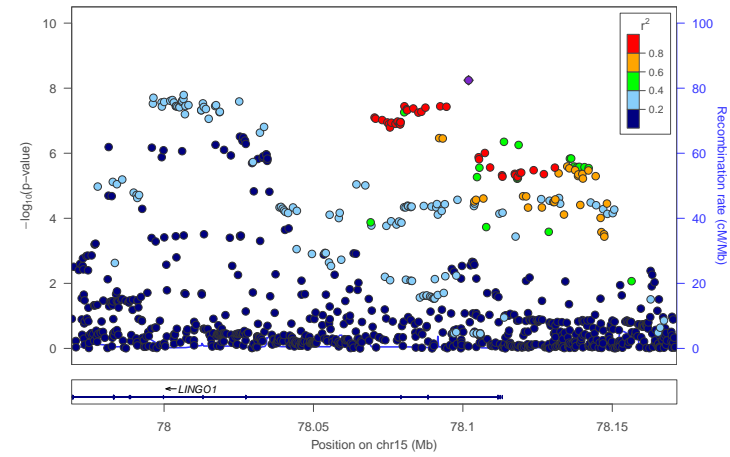

rs35994060

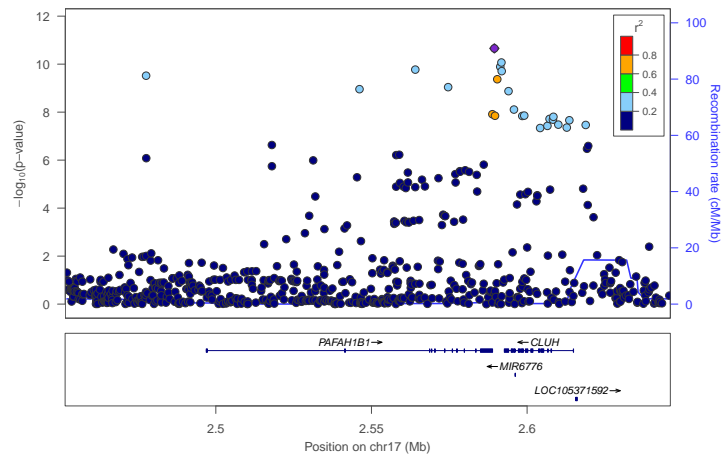

rs11650427

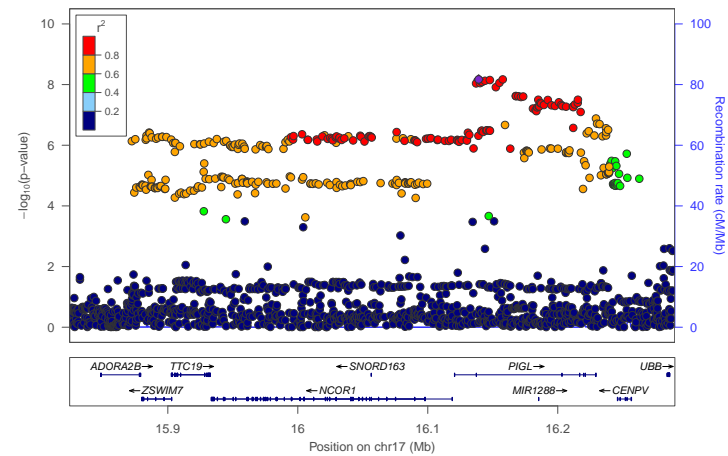

rs868150

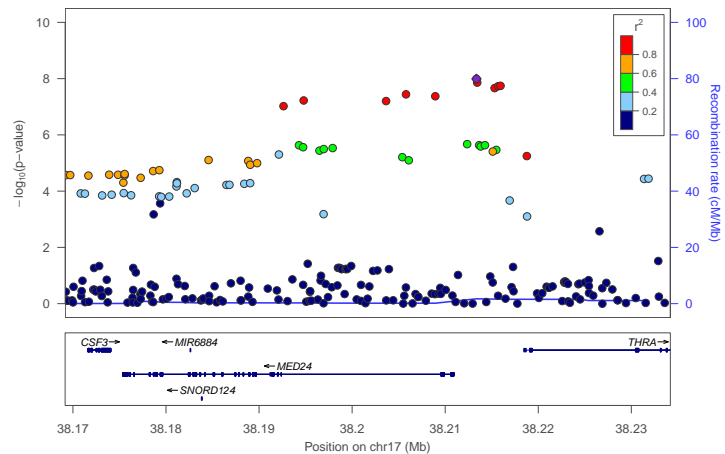

rs56280951

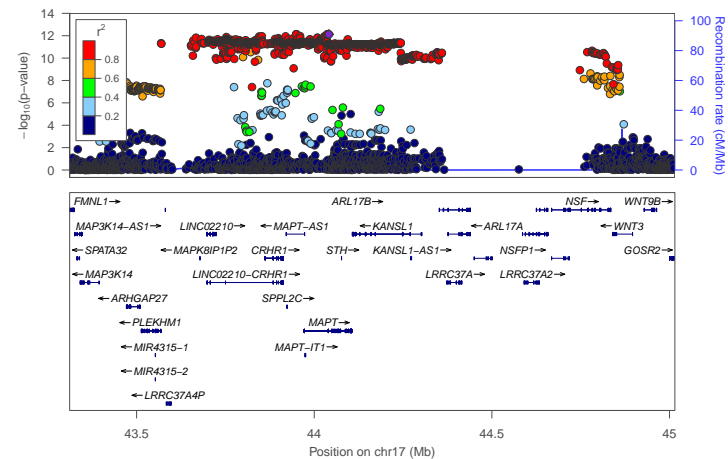

rs55731231

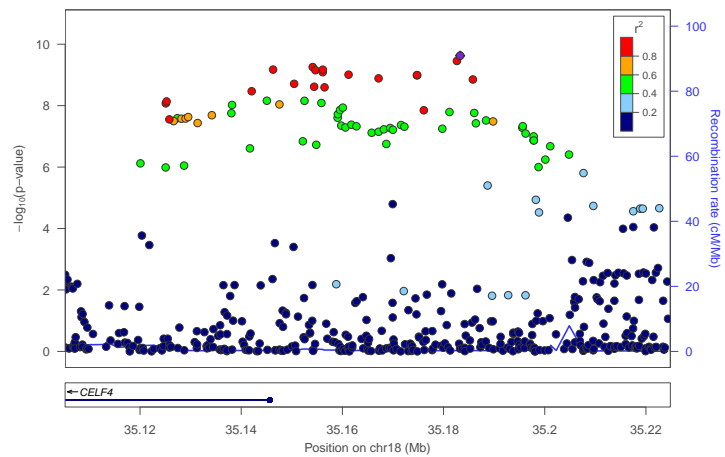

rs17681615

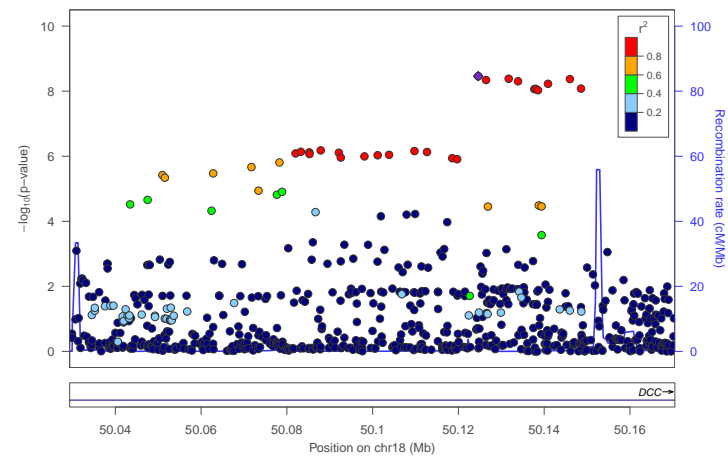

rs17501820

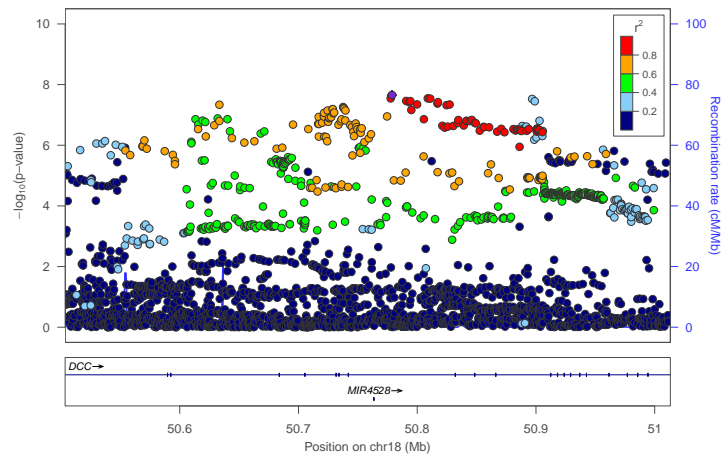

**Supplementary Figure 7. Regional plots of GWA analyses of item MIS.**

The  $y$ -axis represents the negative logarithm (base 10) of the SNP  $P$  value and the  $x$ -axis the position on the chromosome, with the name and location of genes in the UCSC Genome Browser in the bottom panel. The SNP with the lowest  $P$  value in the region is marked by a purple diamond. The colors of the other SNPs indicate the  $r^2$  of these SNPs with the lead SNP, with grey color indicating SNPs below the user-defined  $r^2$ . Plots are generated with LocusZoom. See **Supplementary Data 2** for an overview of all lead SNPs for which a regional plot is presented above.

rs12137936

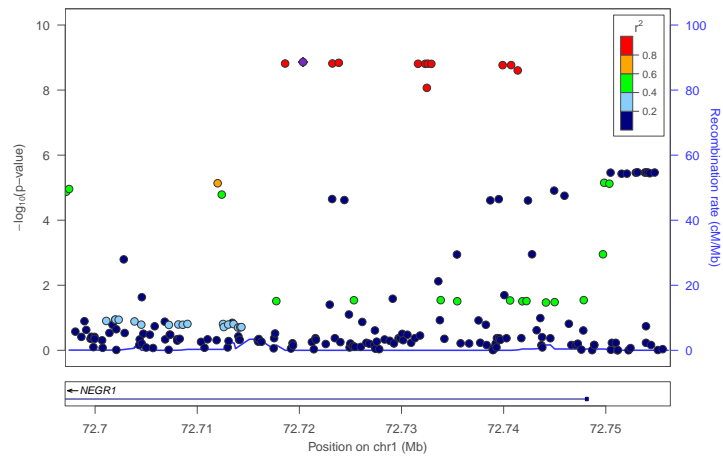

rs11184994

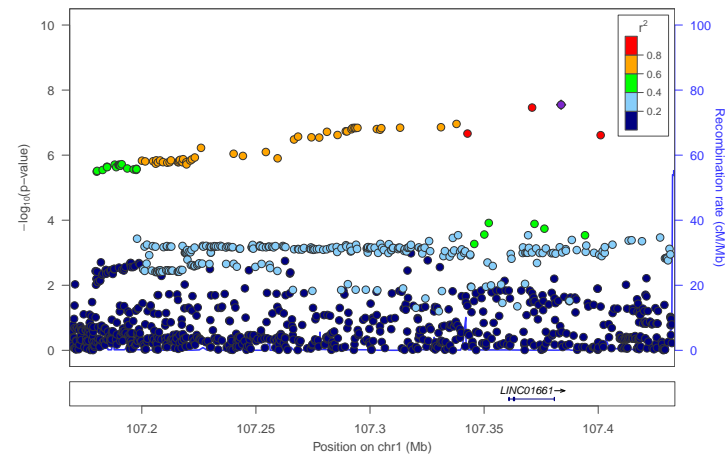

rs4651205

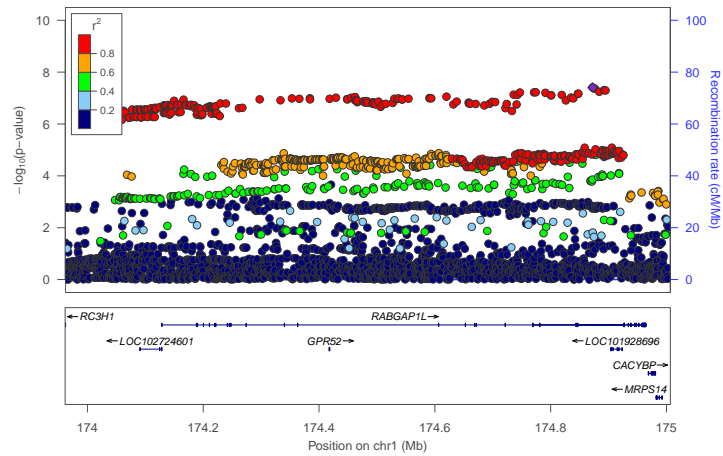

rs2678897

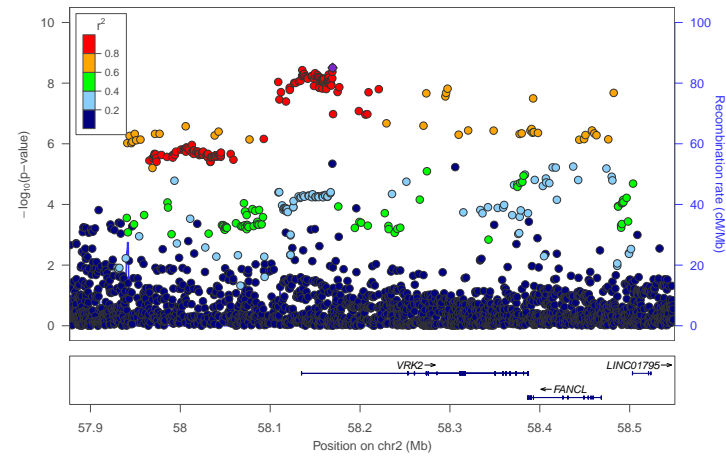

rs35789697

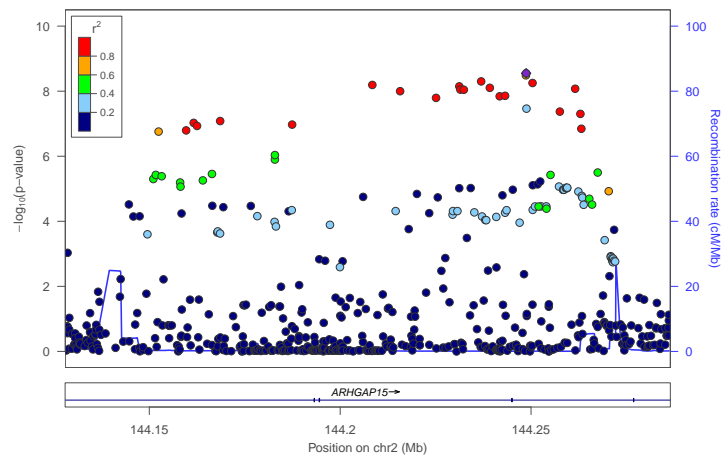

rs11687833

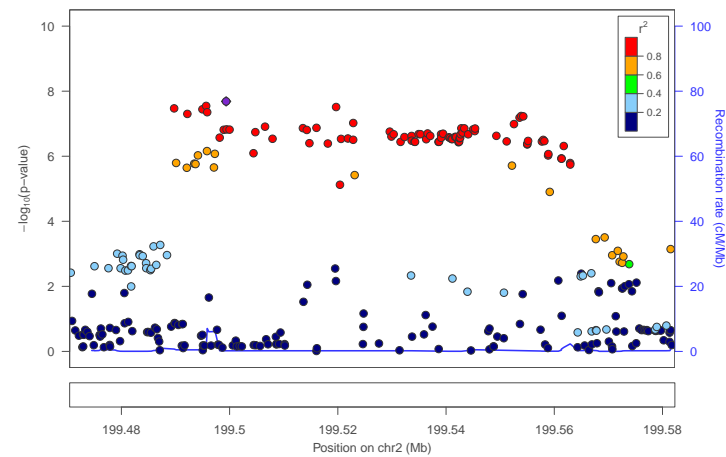



rs34759087

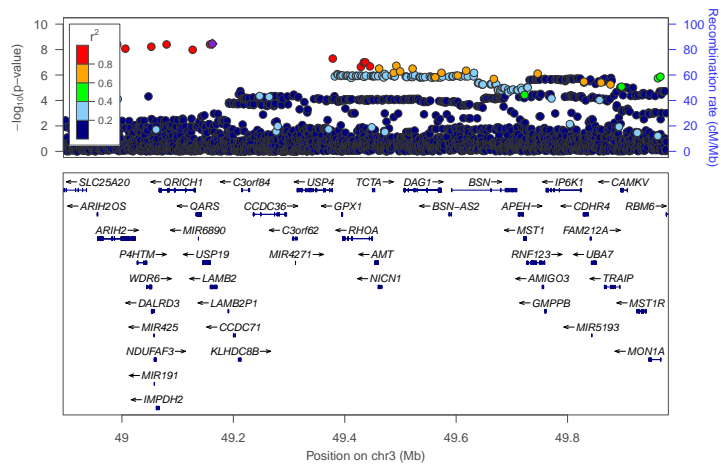

rs9852417

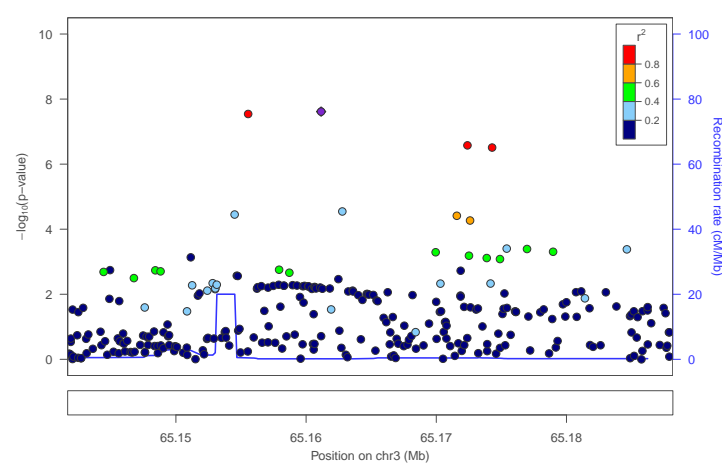

rs600011

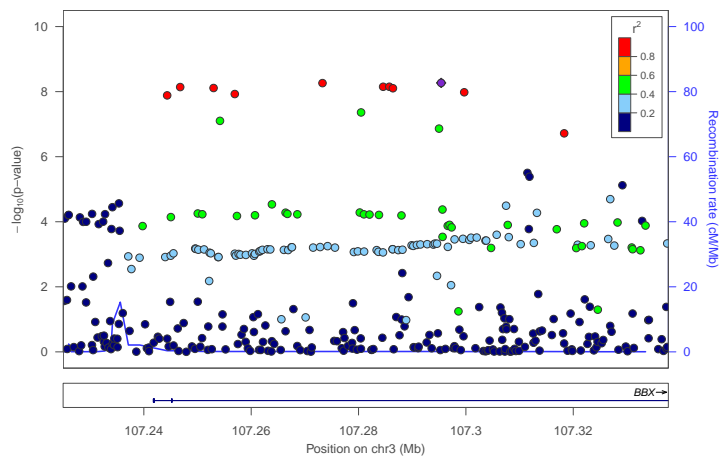

rs11712223

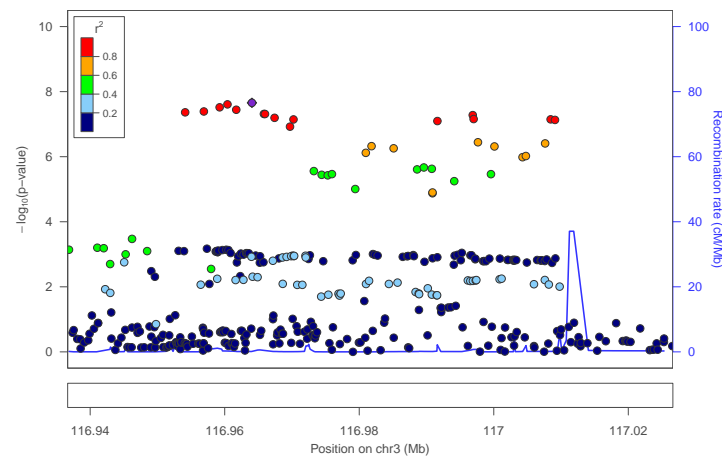

rs68152875

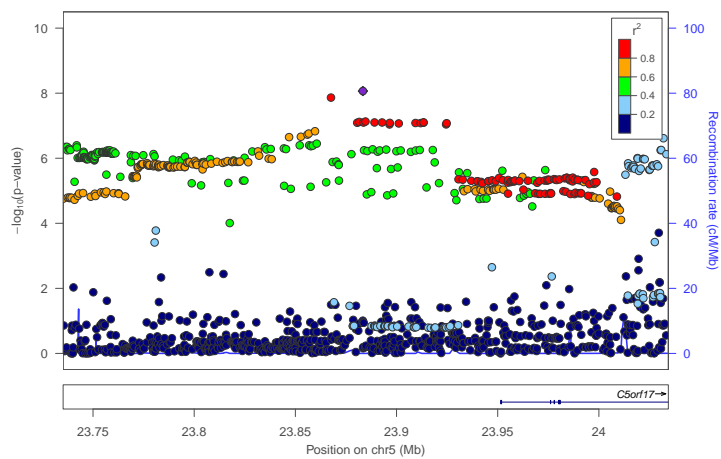

rs6895295

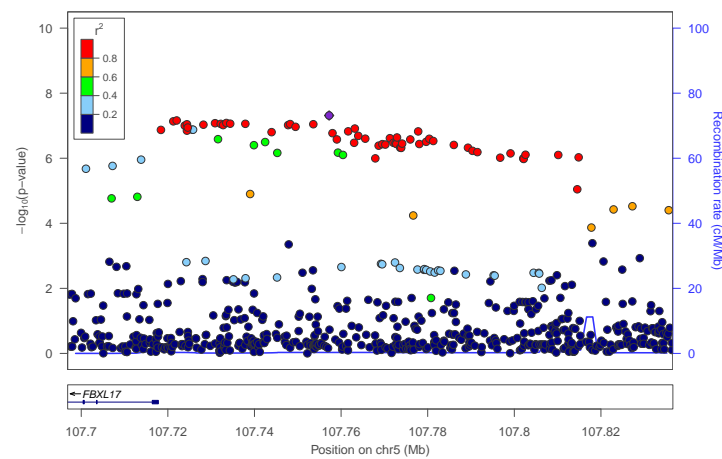

rs6889822

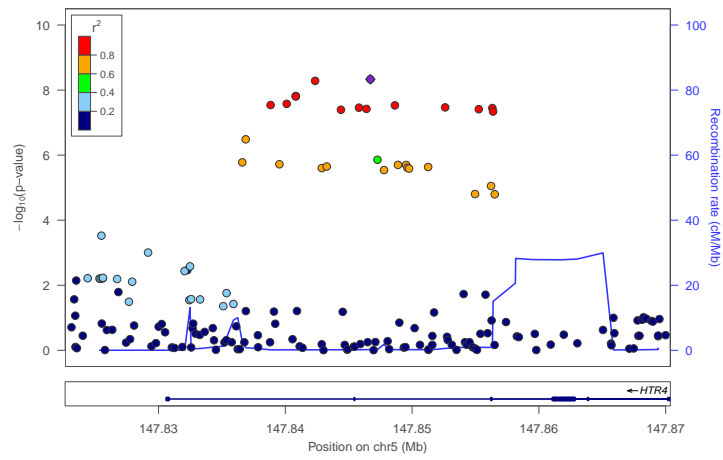

rs12524535

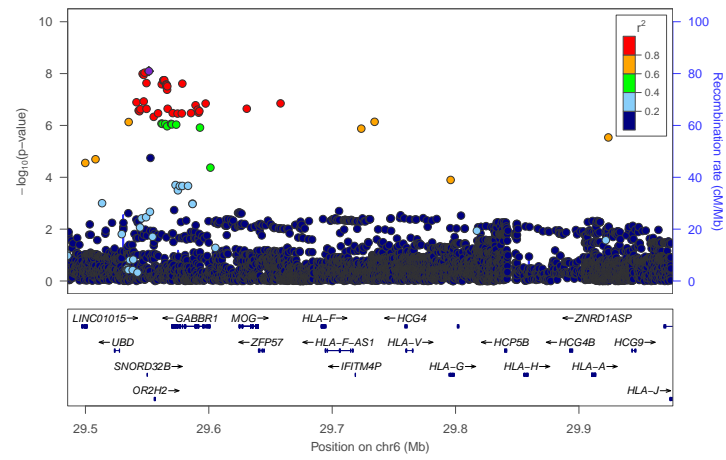

rs9344688

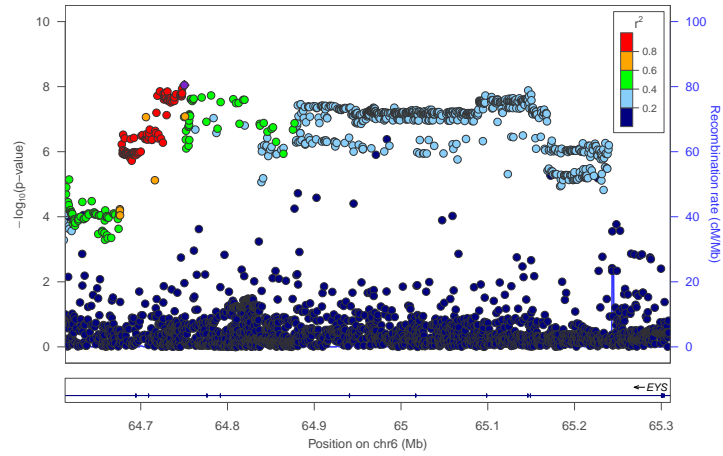

rs1890408

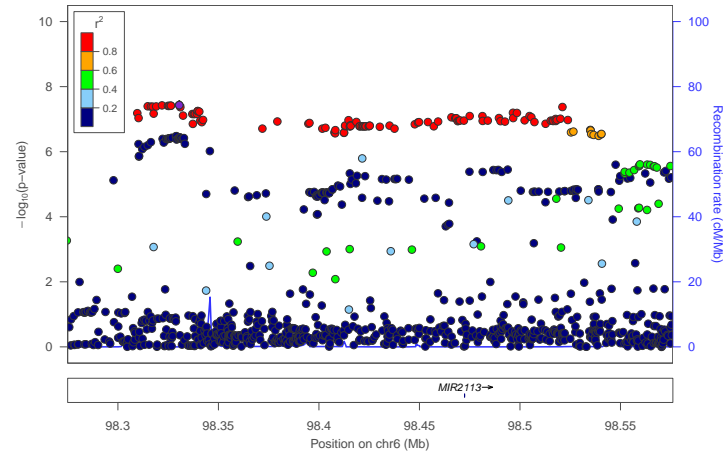

rs67447472

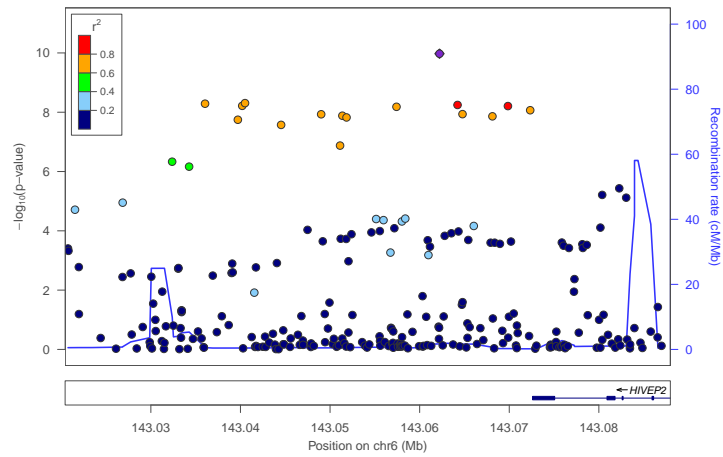

rs11509880

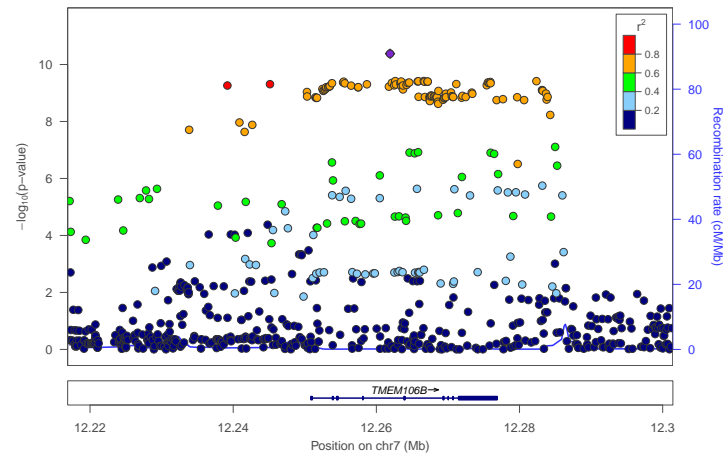

rs1833070

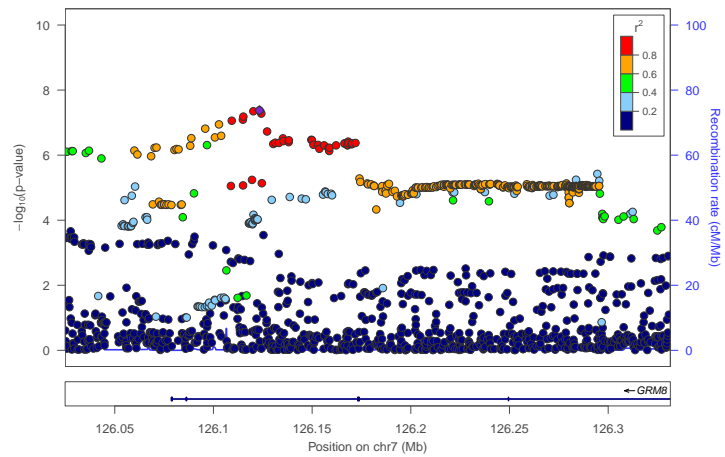

rs1962104

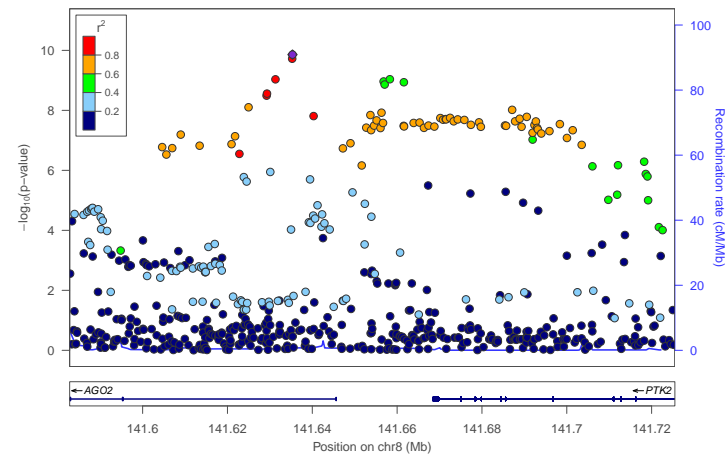

rs56318386

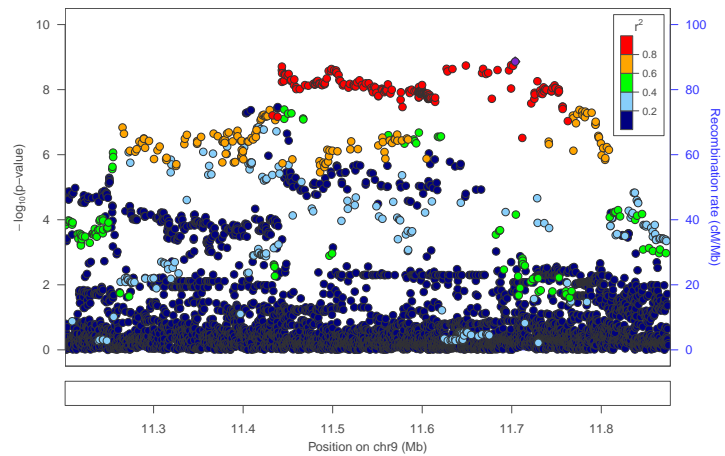

rs1360379

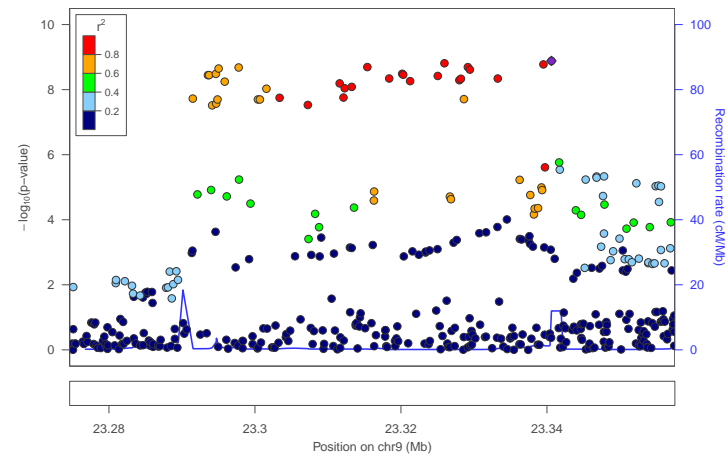

rs10983783

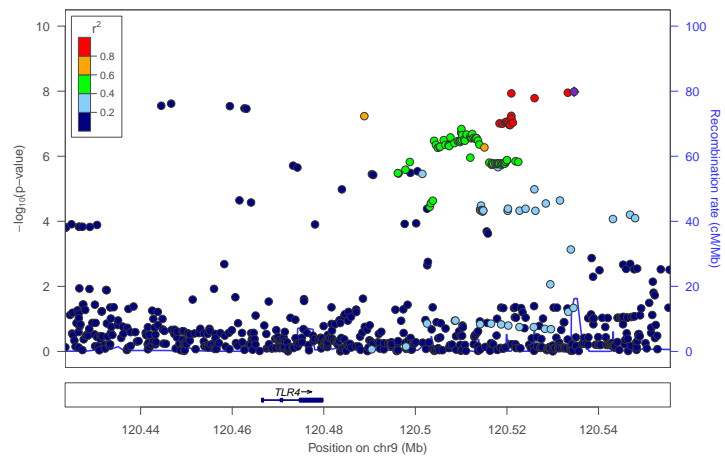

rs4836789

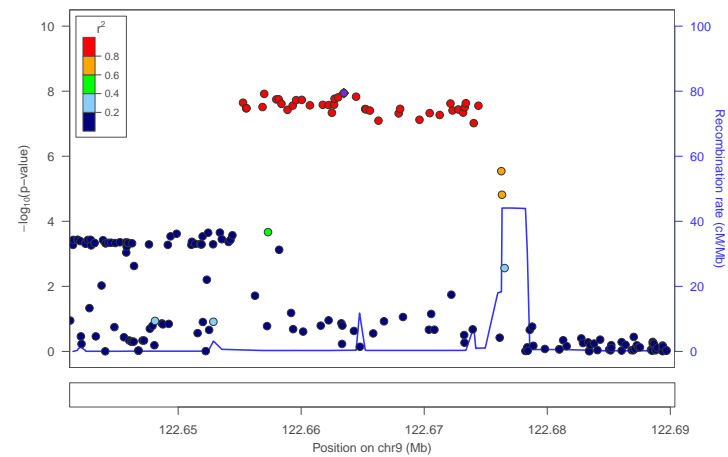

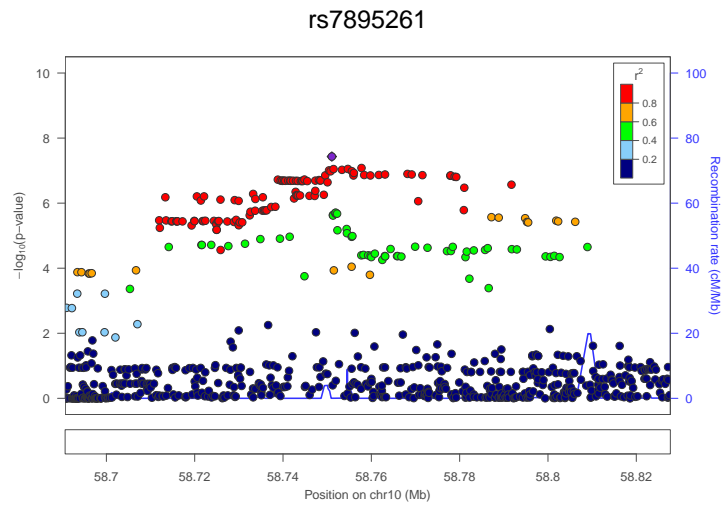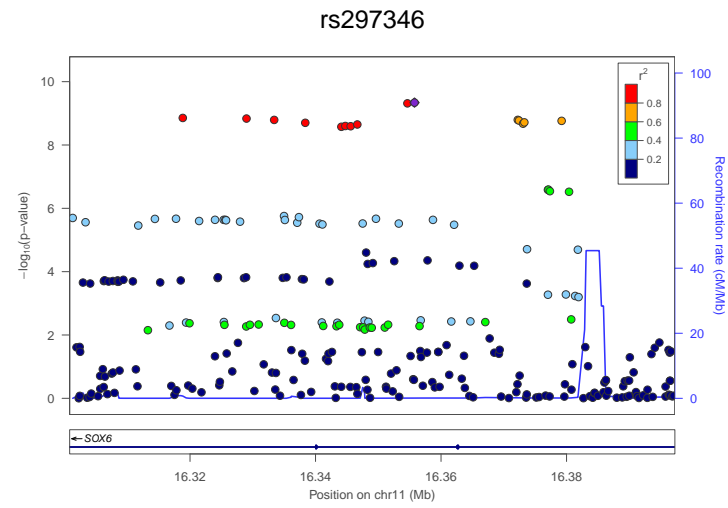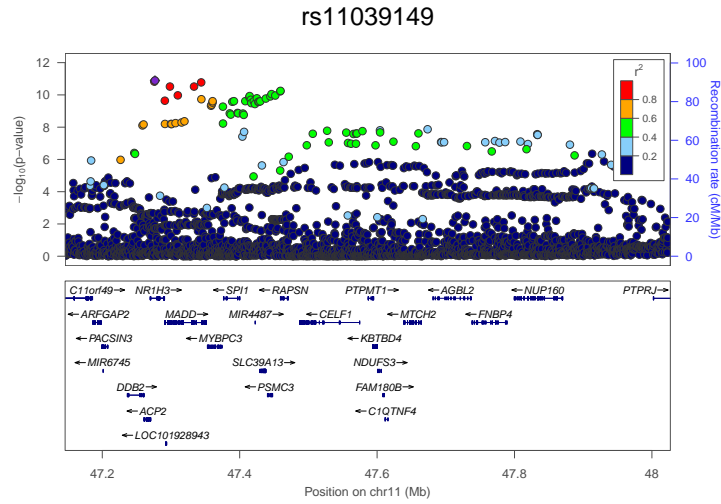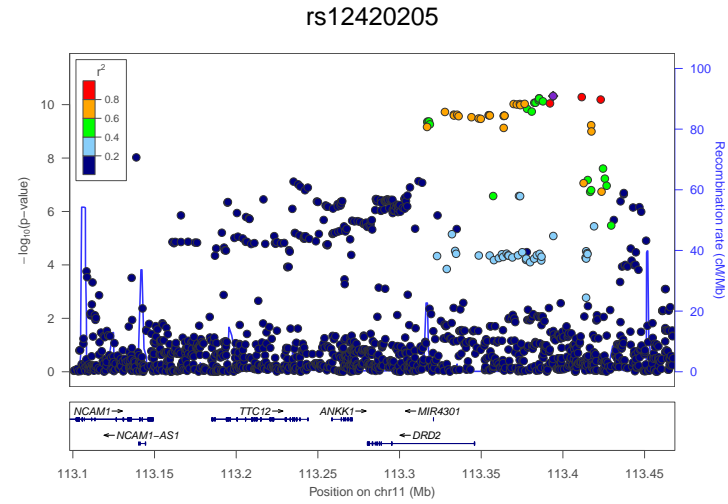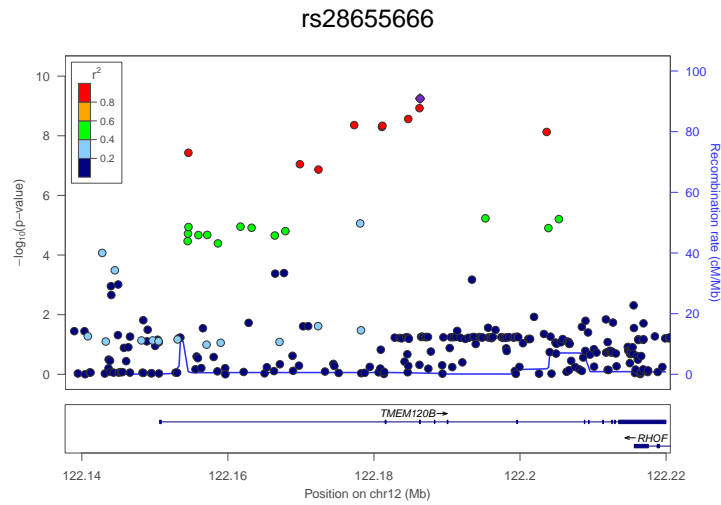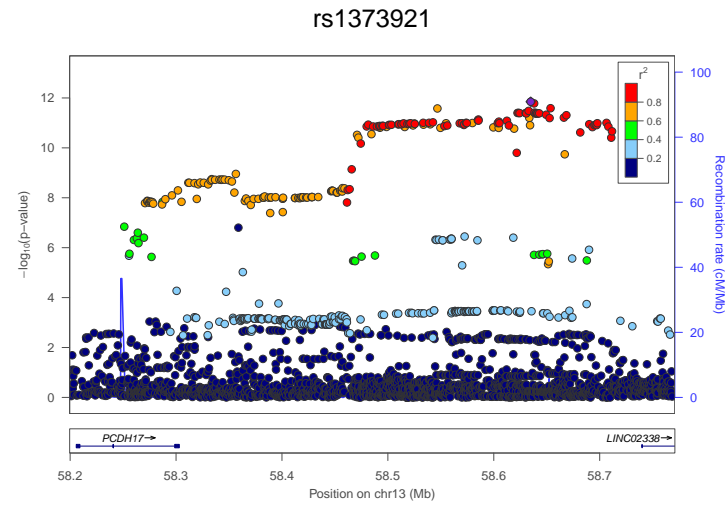

rs9671386

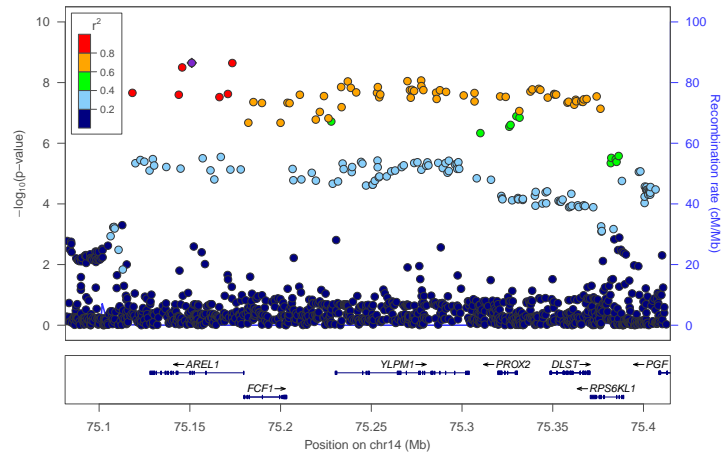

rs7202252

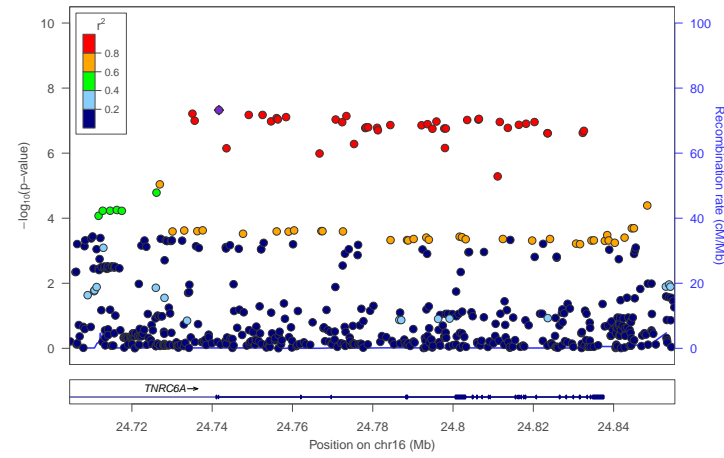

rs9929242

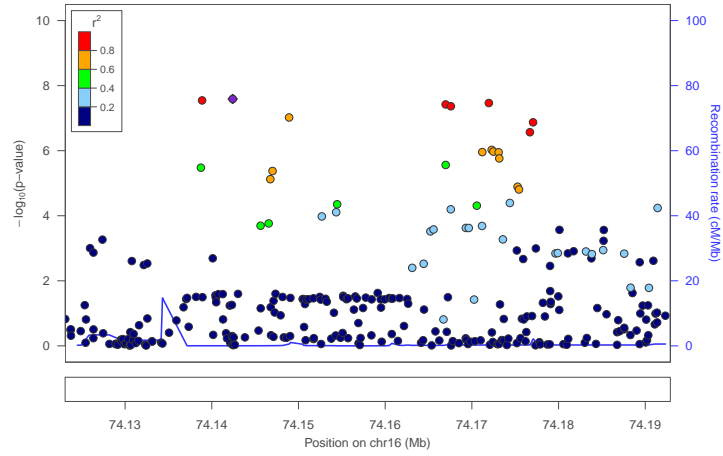

rs56059702

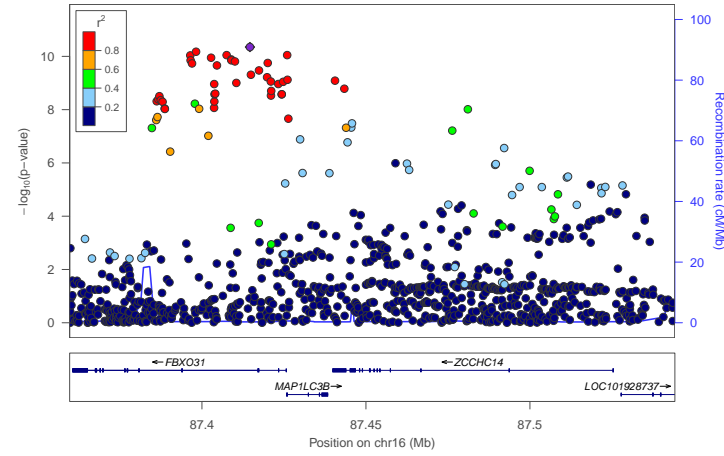

rs55657917

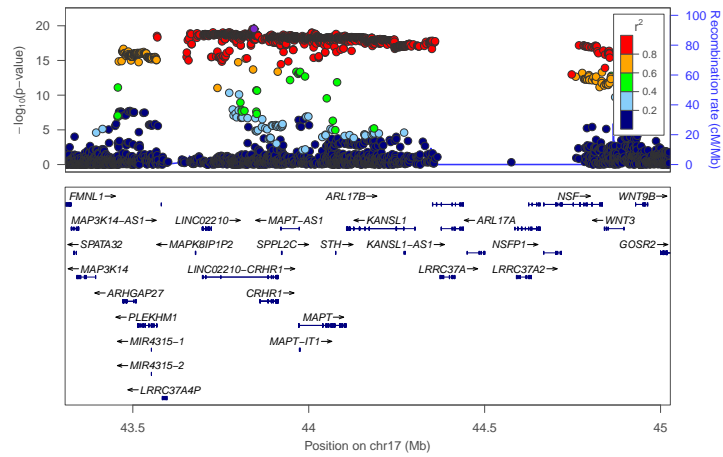

rs11082011

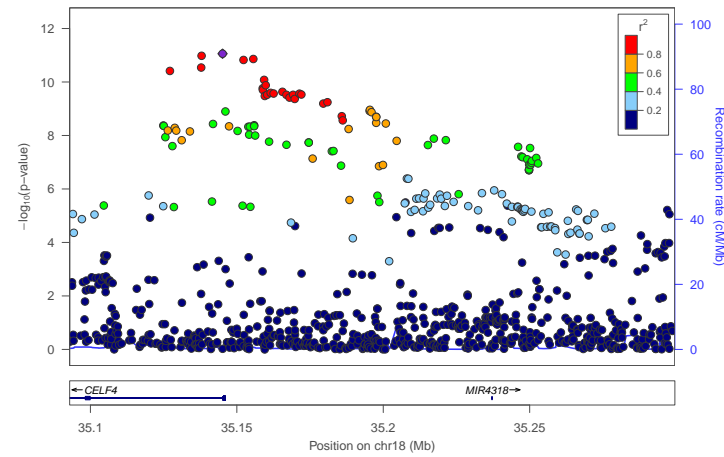

rs11877496

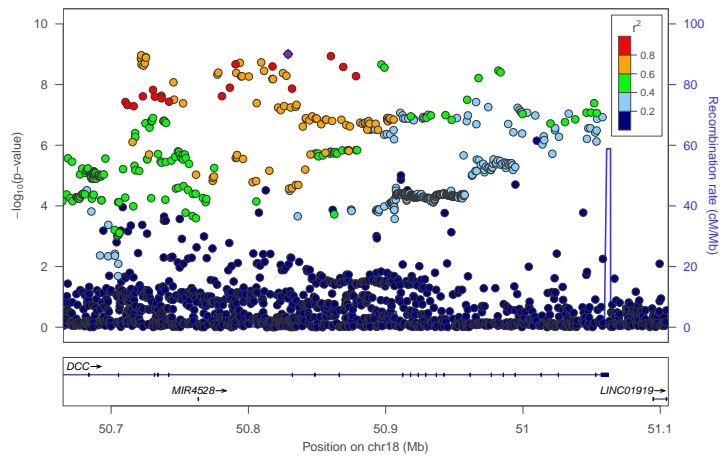

rs56403421

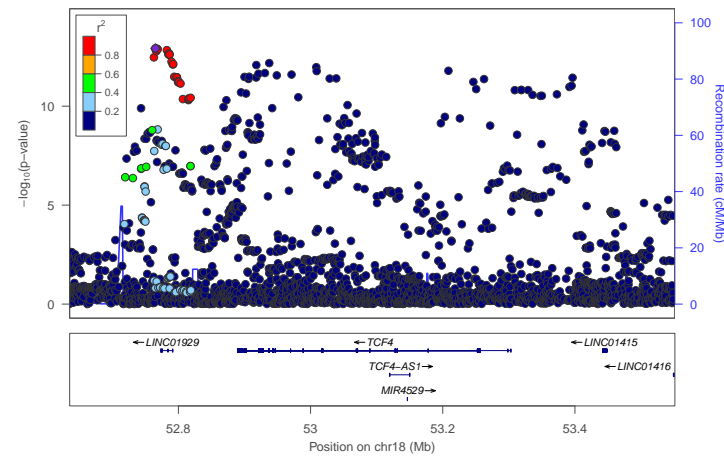

rs6103271

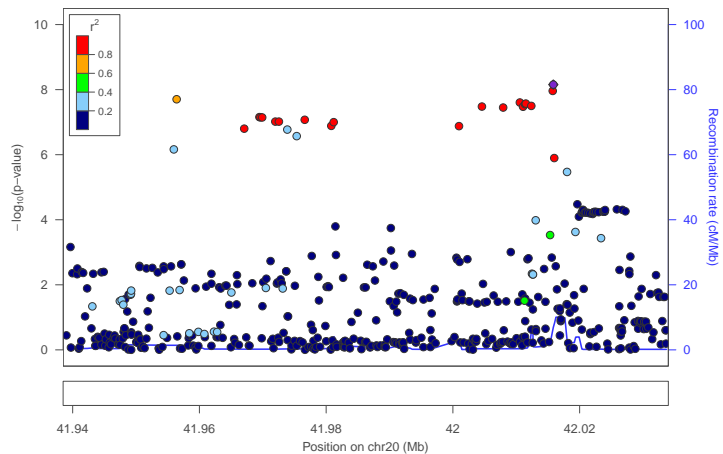

rs4578918

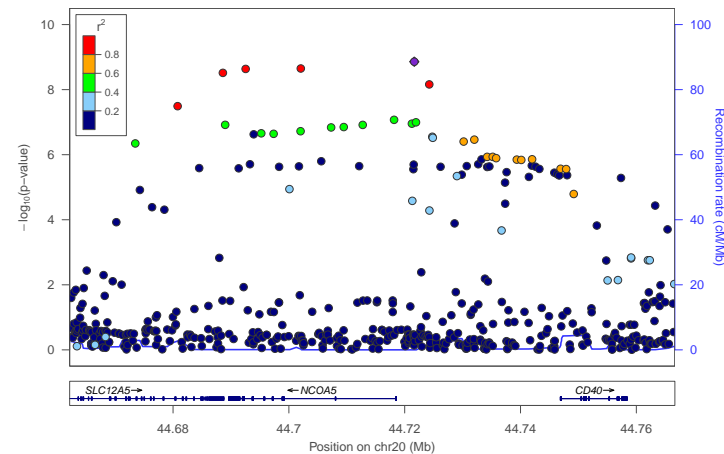

rs11090039

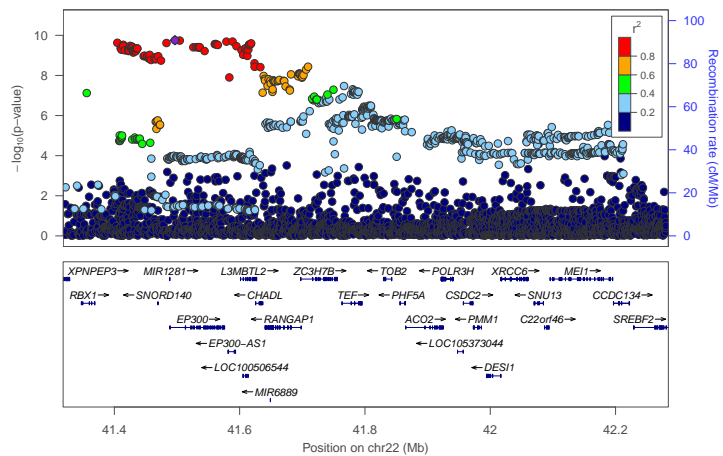

**Supplementary Figure 8. Regional plots of GWA analyses of item MOOD.**

The  $y$ -axis represents the negative logarithm (base 10) of the SNP  $P$  value and the  $x$ -axis the position on the chromosome, with the name and location of genes in the UCSC Genome Browser in the bottom panel. The SNP with the lowest  $P$  value in the region is marked by a purple diamond. The colors of the other SNPs indicate the  $r^2$  of these SNPs with the lead SNP, with grey color indicating SNPs below the user-defined  $r^2$ . Plots are generated with LocusZoom. See **Supplementary Data 2** for an overview of all lead SNPs for which a regional plot is presented above.

rs11209175

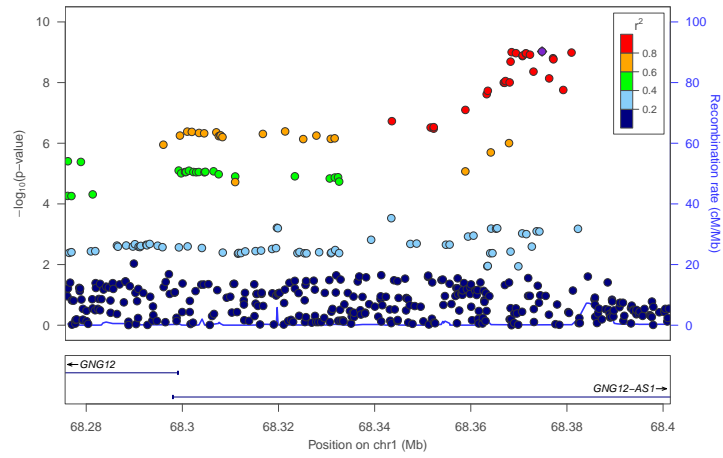

rs34668726

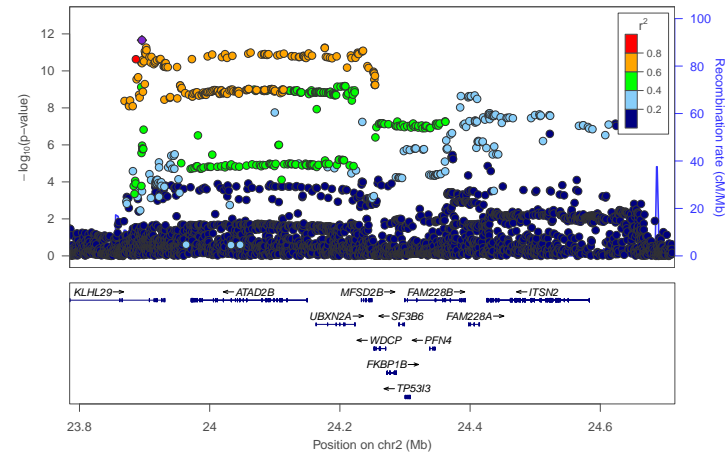

rs17194468

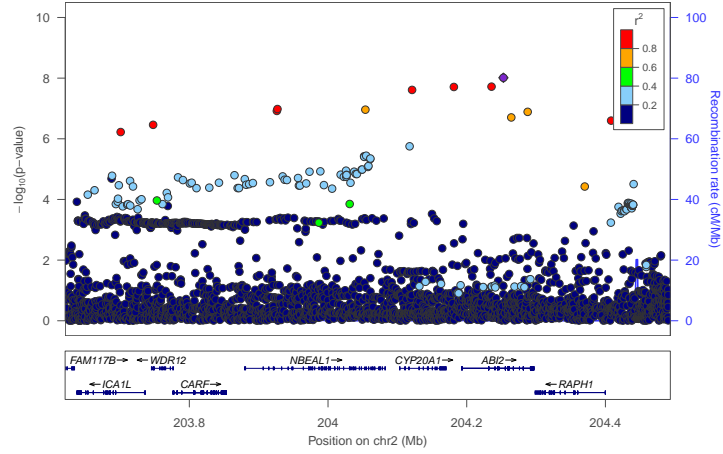

rs1439253

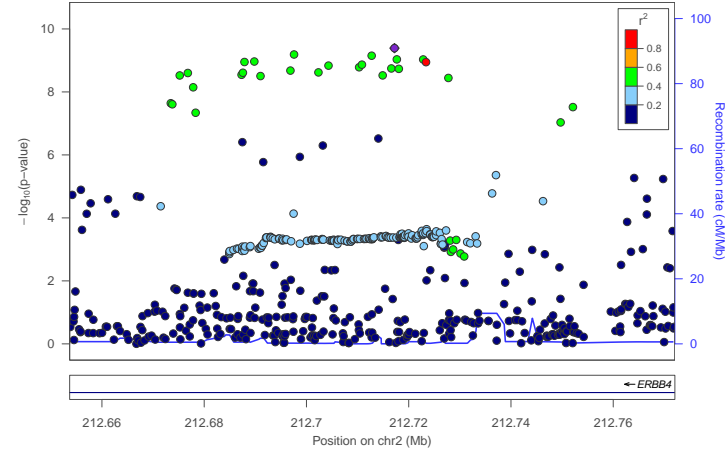

rs1400868

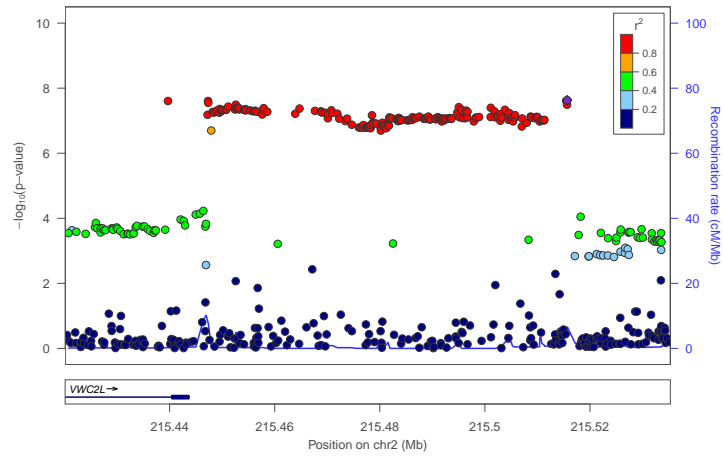

rs9867227

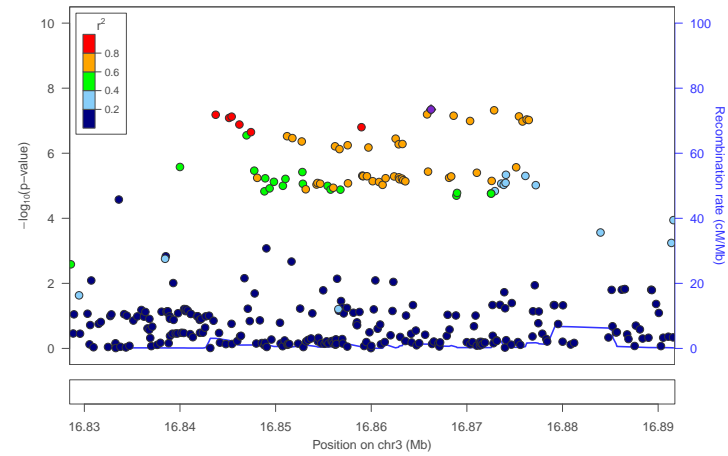



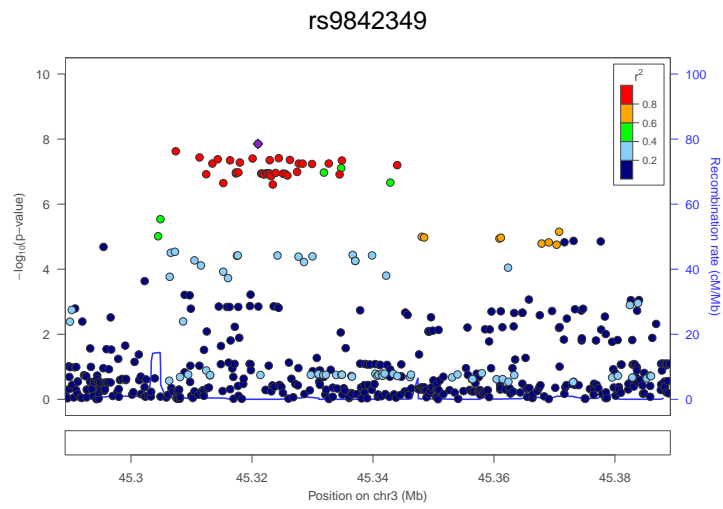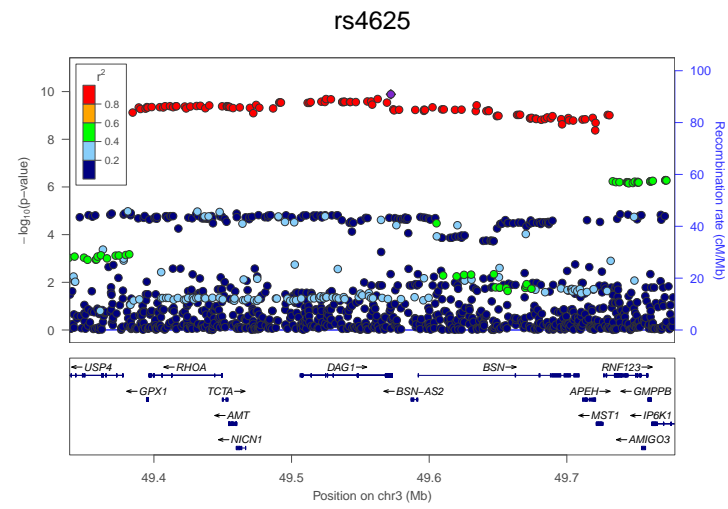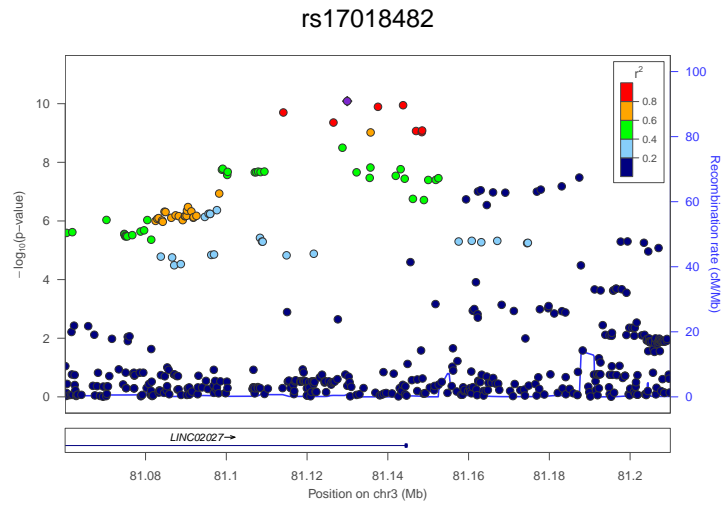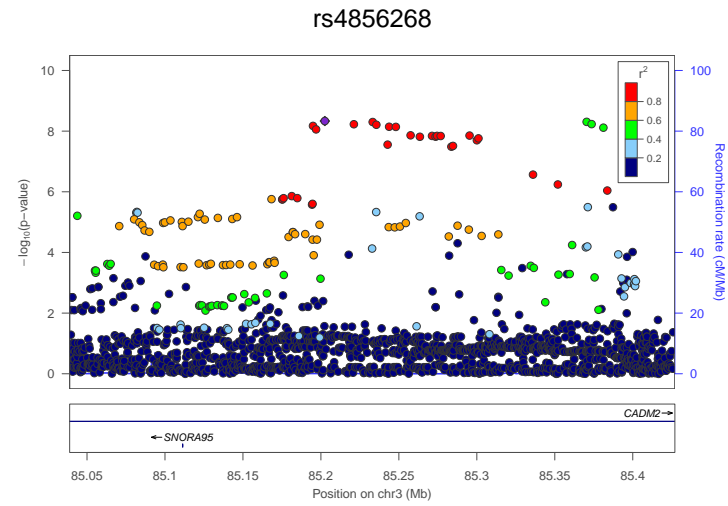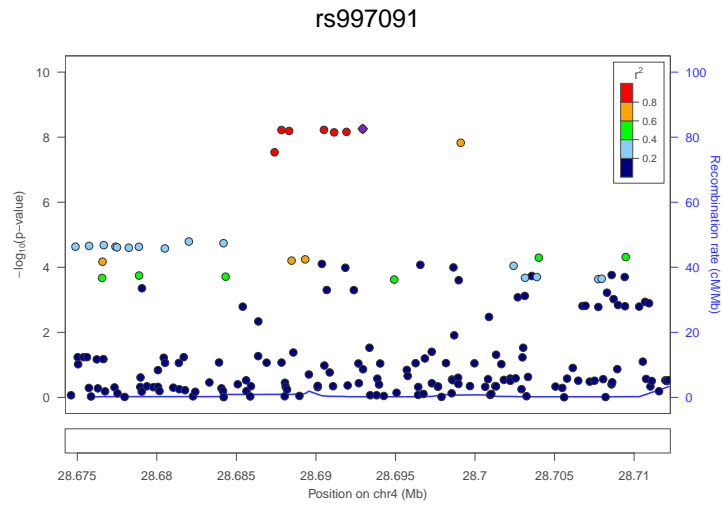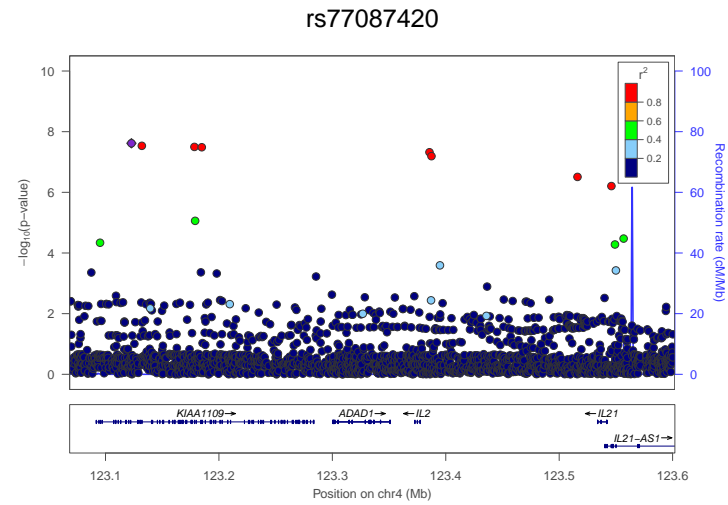

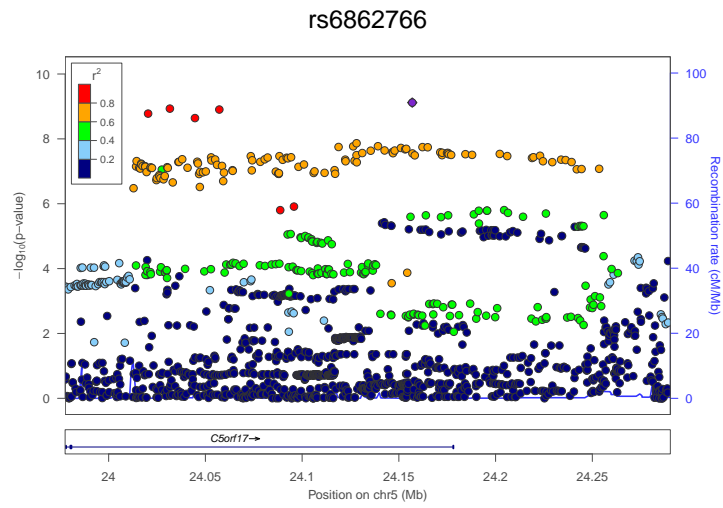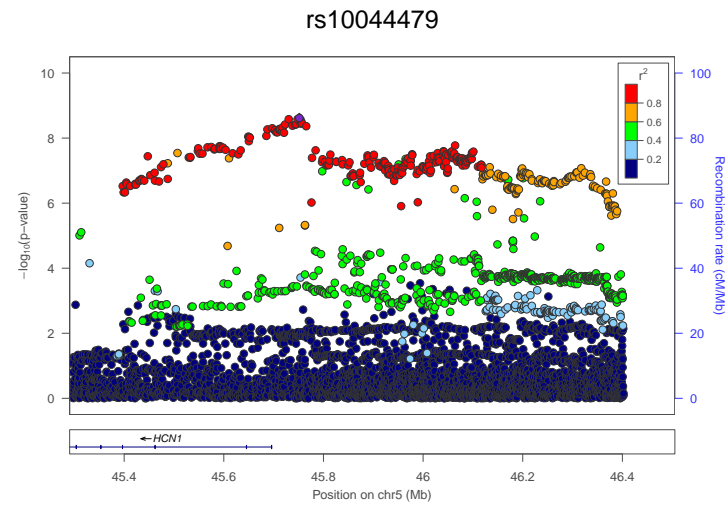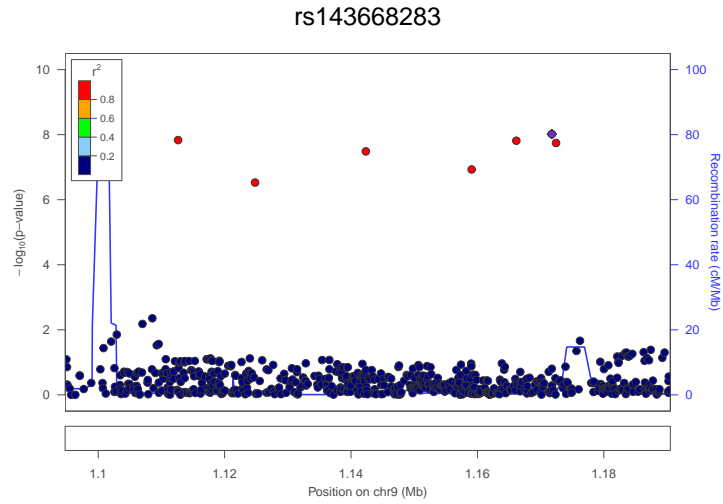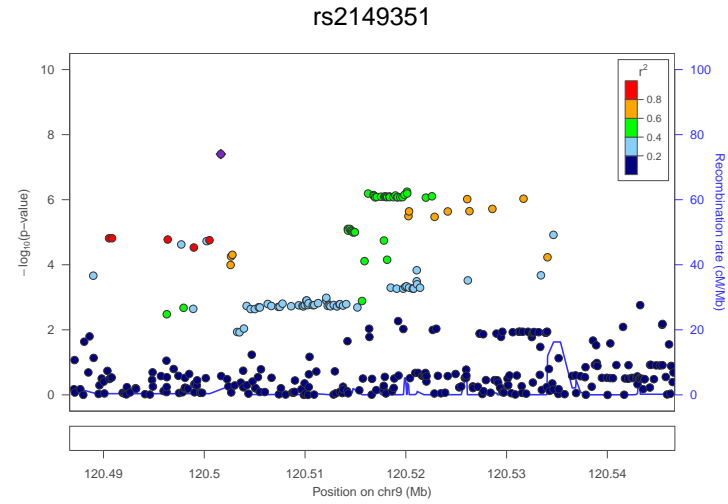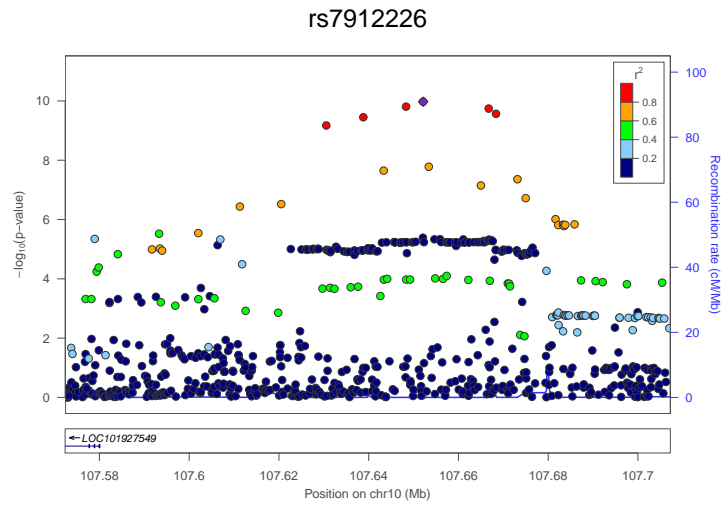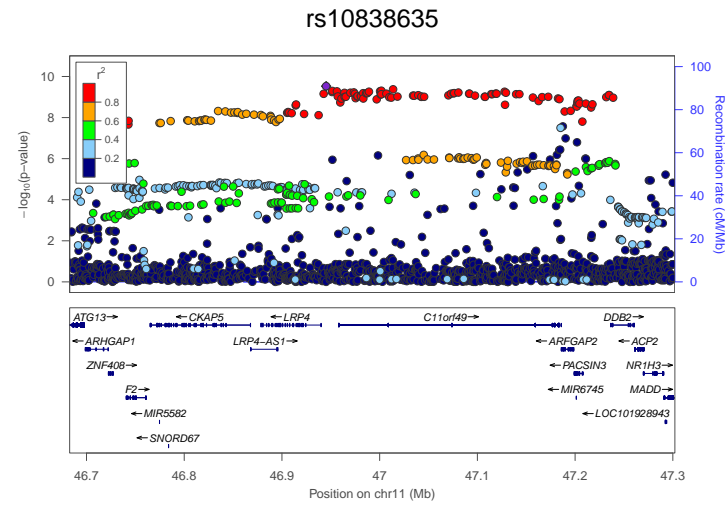

rs11532157

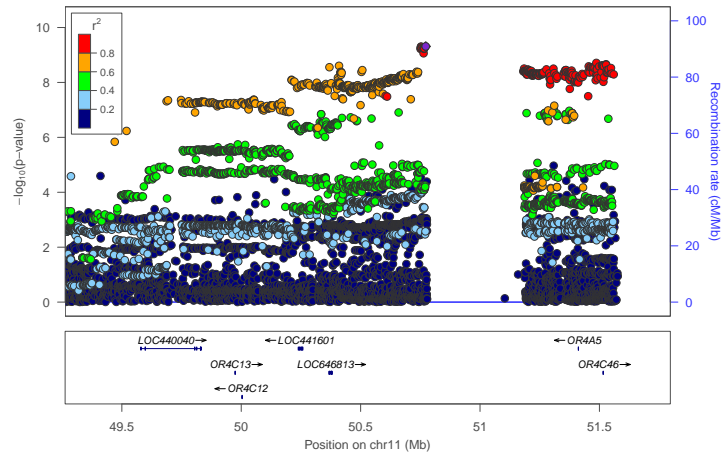

rs2262536

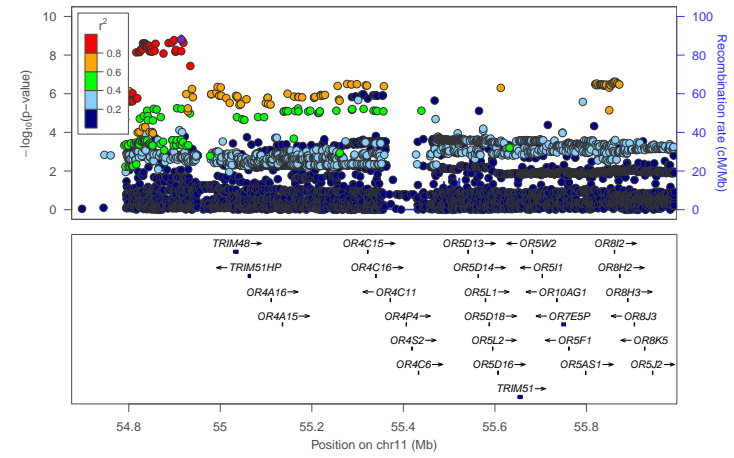

rs7334060

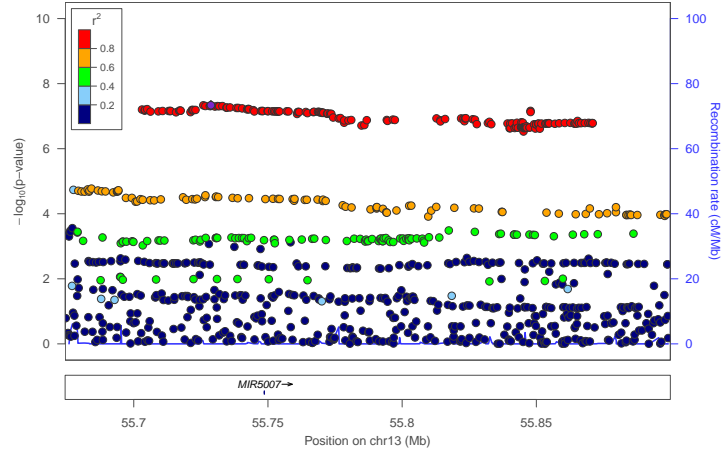

rs1275411

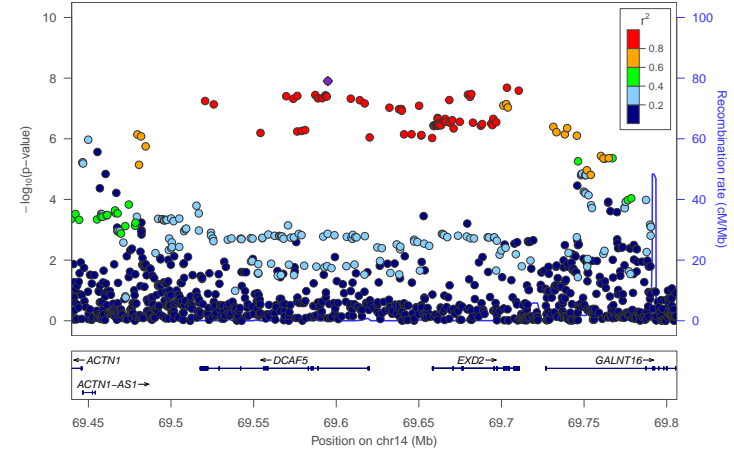

rs10144845

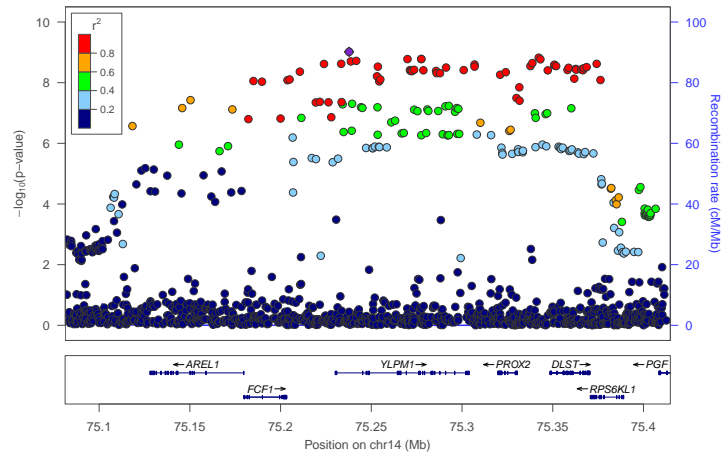

rs34641928

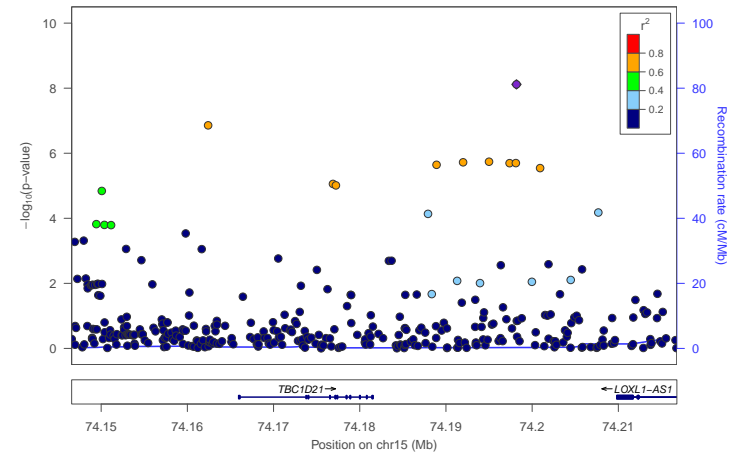

rs783537

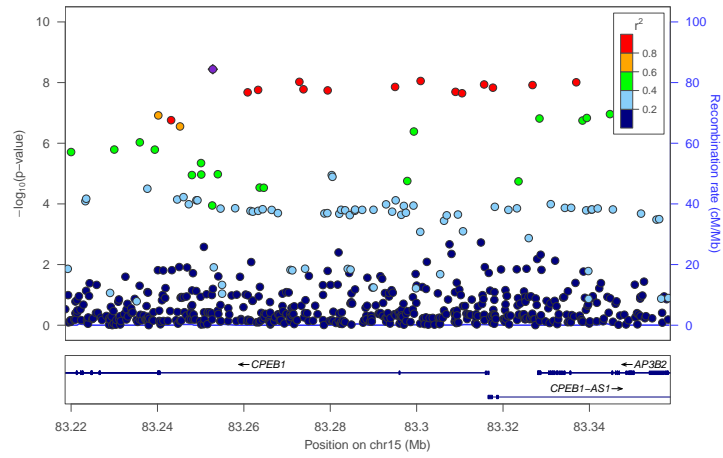

rs61744010

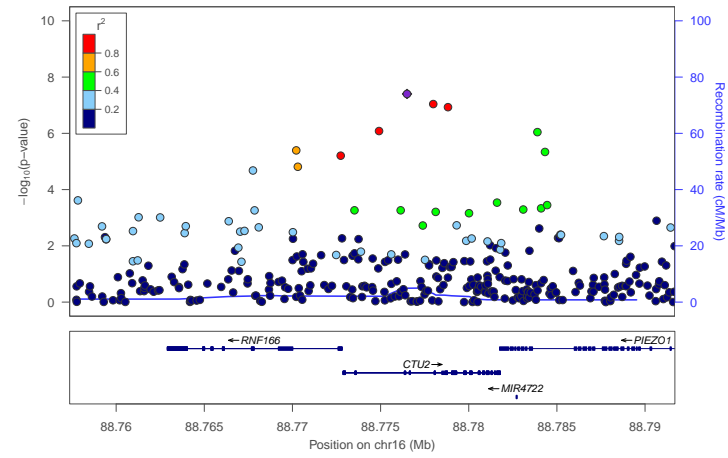

rs4630591

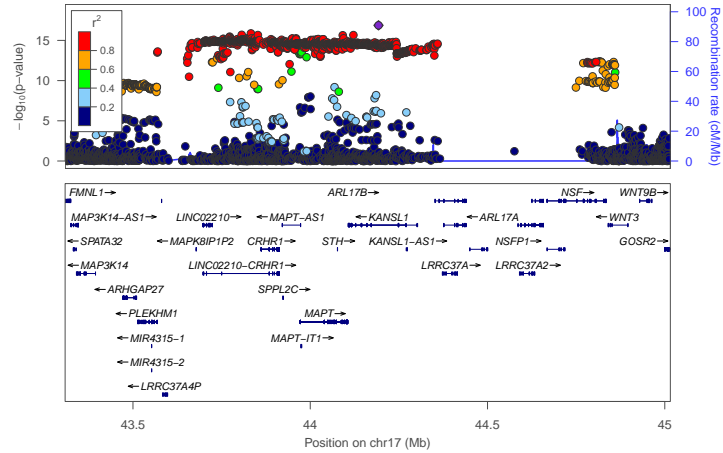

rs4799949

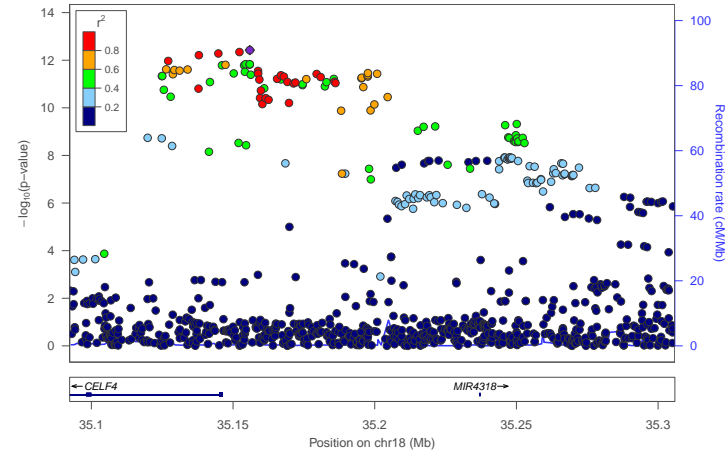

rs1875560

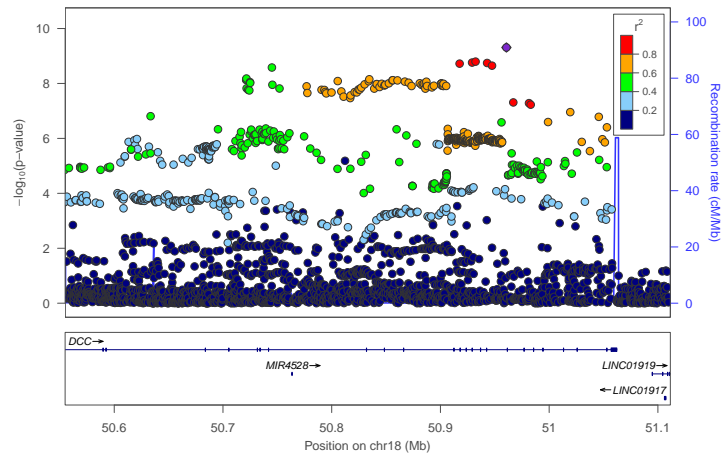

rs599550

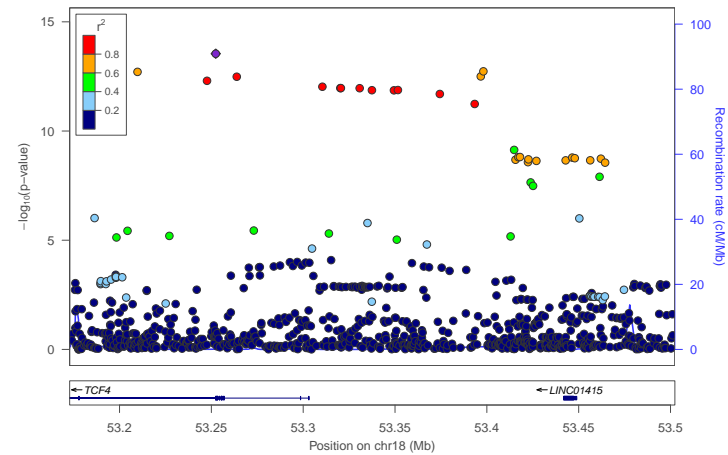

rs10409264

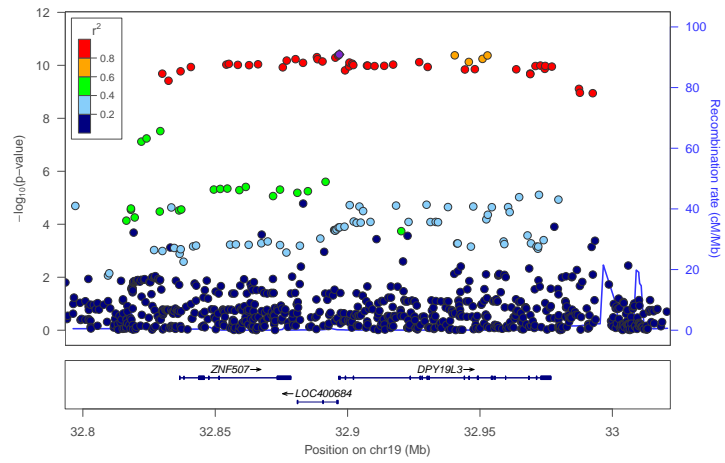

rs6130328

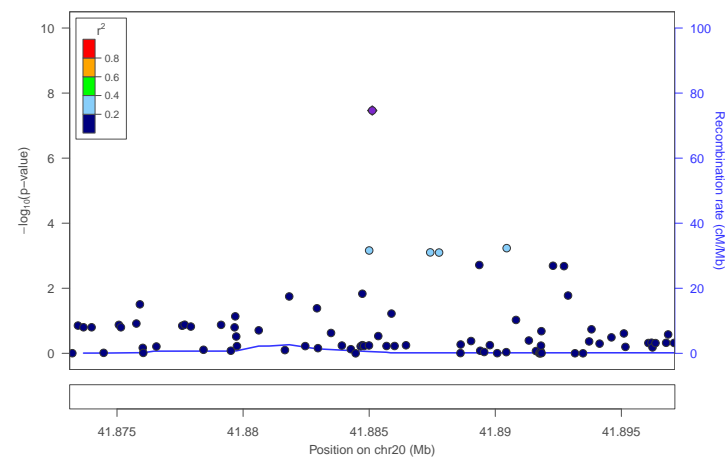

rs6031966

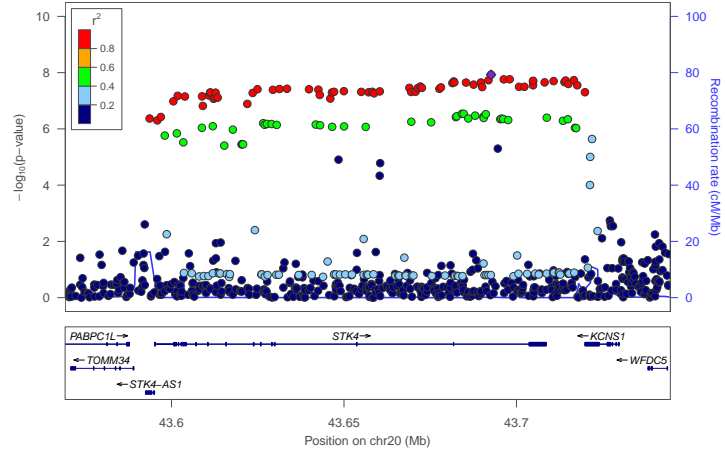

**Supplementary Figure 9. Regional plots of GWA analyses of item FED-UP.**

The  $y$ -axis represents the negative logarithm (base 10) of the SNP  $P$  value and the  $x$ -axis the position on the chromosome, with the name and location of genes in the UCSC Genome Browser in the bottom panel. The SNP with the lowest  $P$  value in the region is marked by a purple diamond. The colors of the other SNPs indicate the  $r^2$  of these SNPs with the lead SNP, with grey color indicating SNPs below the user-defined  $r^2$ . Plots are generated with LocusZoom. See **Supplementary Data 2** for an overview of all lead SNPs for which a regional plot is presented above. For excluded loci (see **Methods; Supplementary Data 3-4**) the rsID's are marked yellow.

rs332828

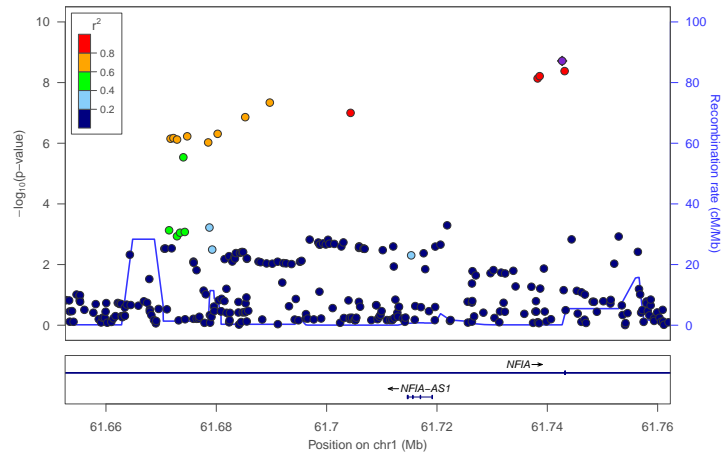

rs10747488

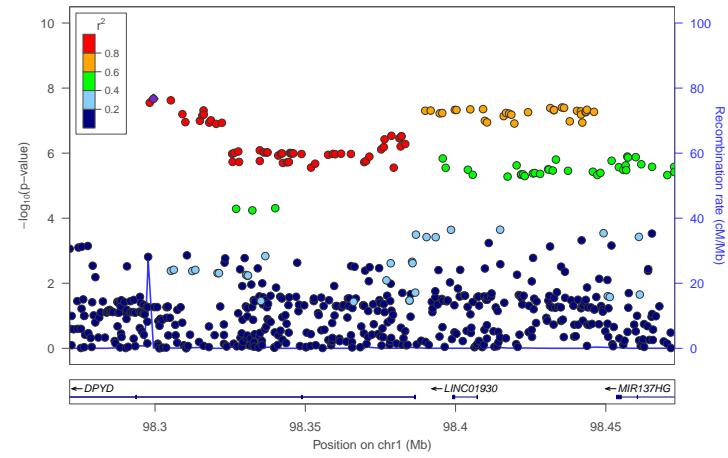

rs12729445

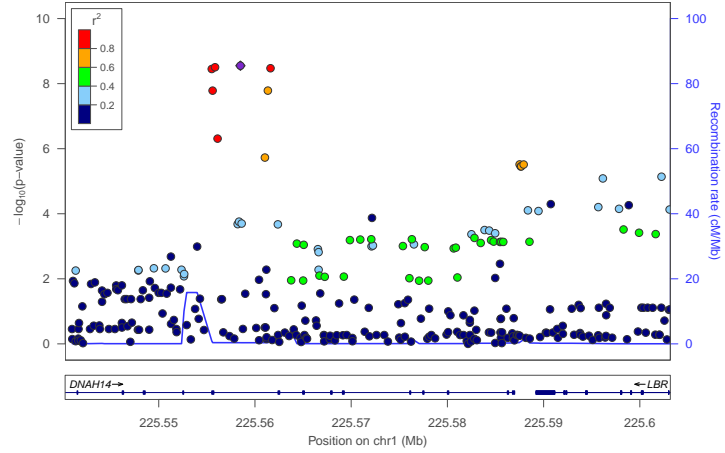

rs1368549

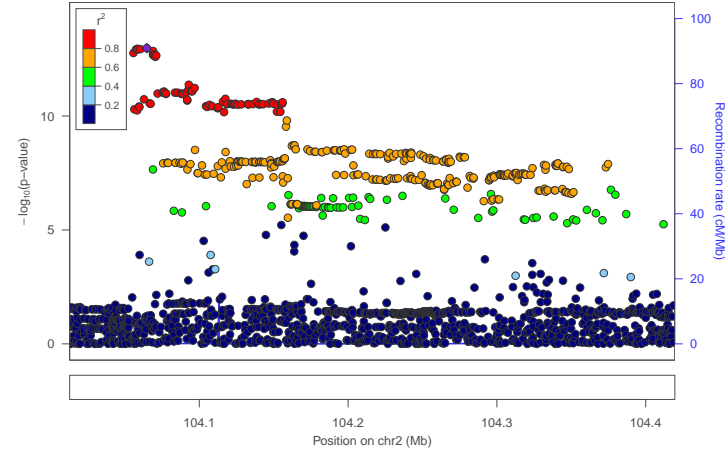

rs13395141

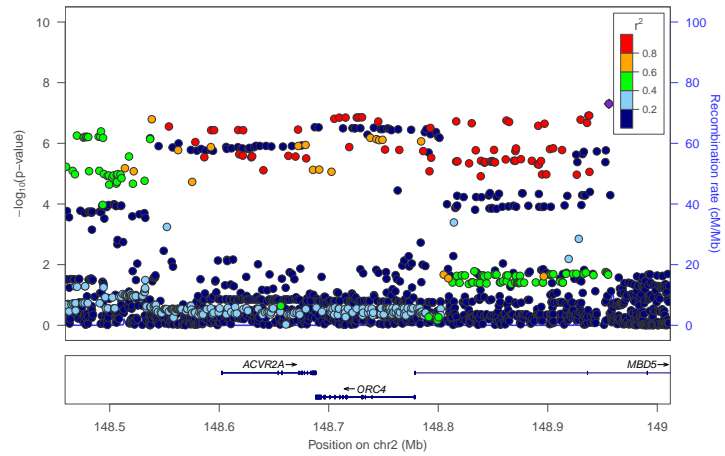

rs9879090

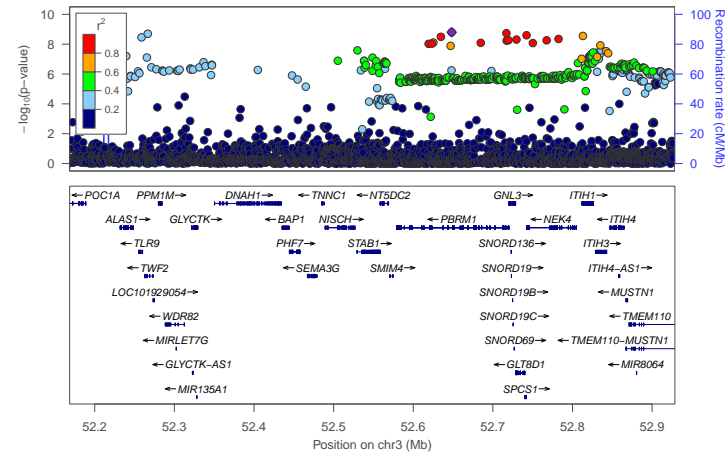

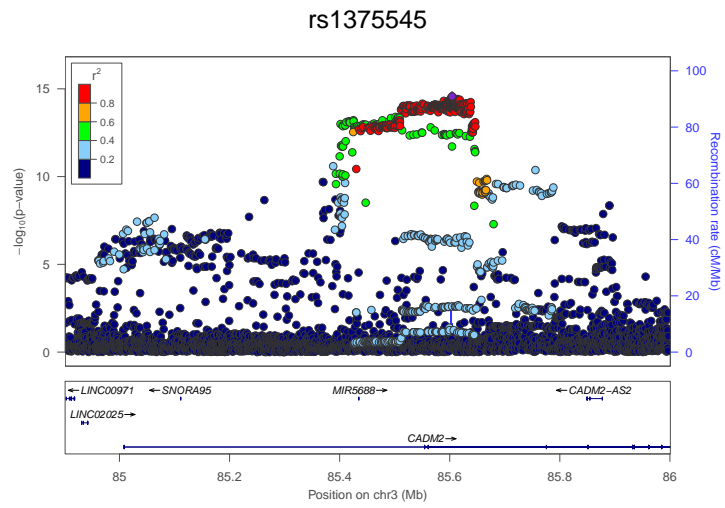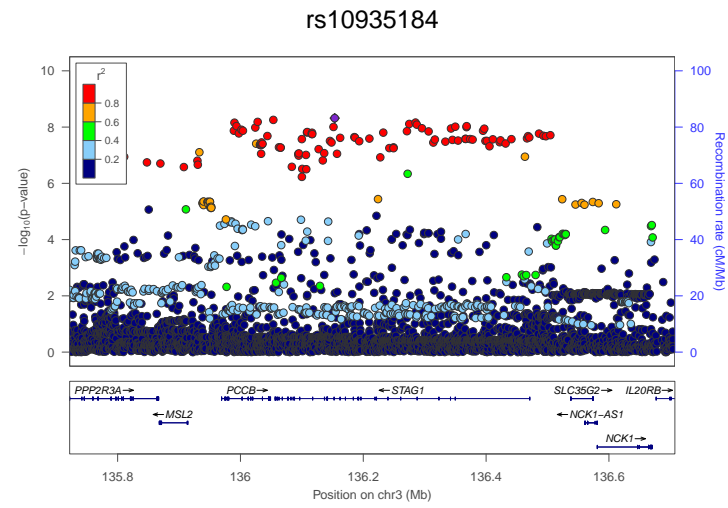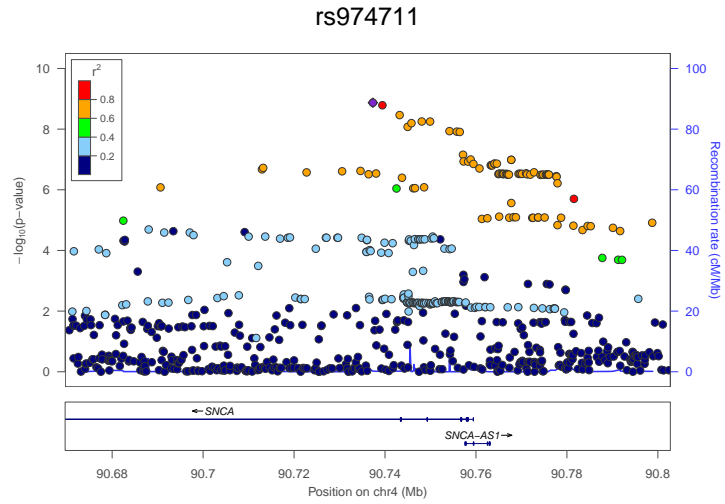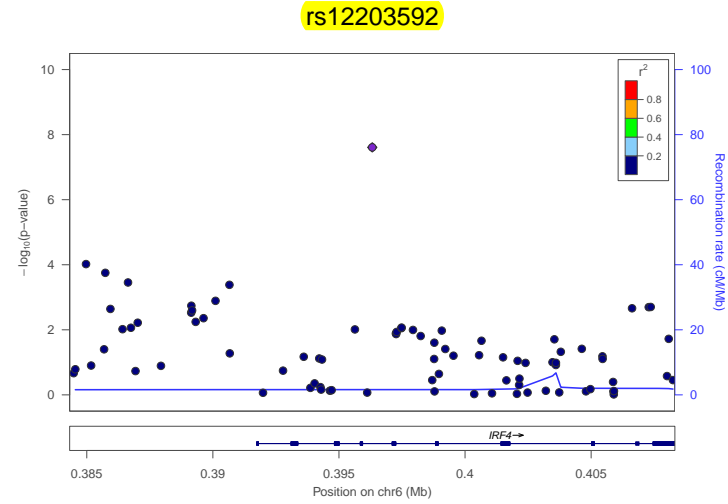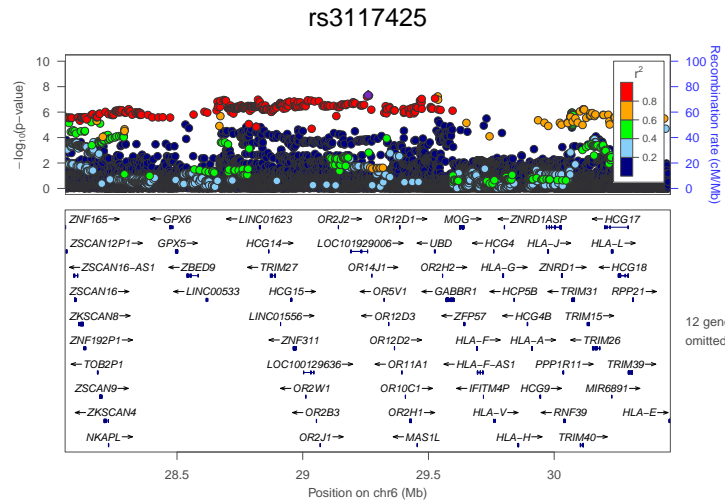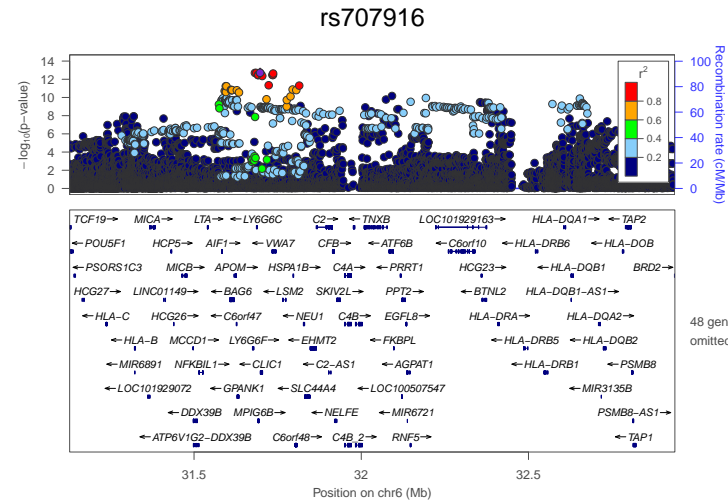



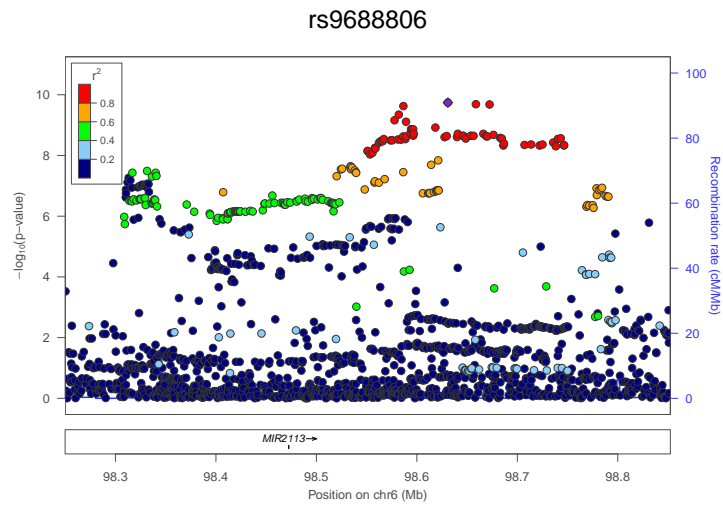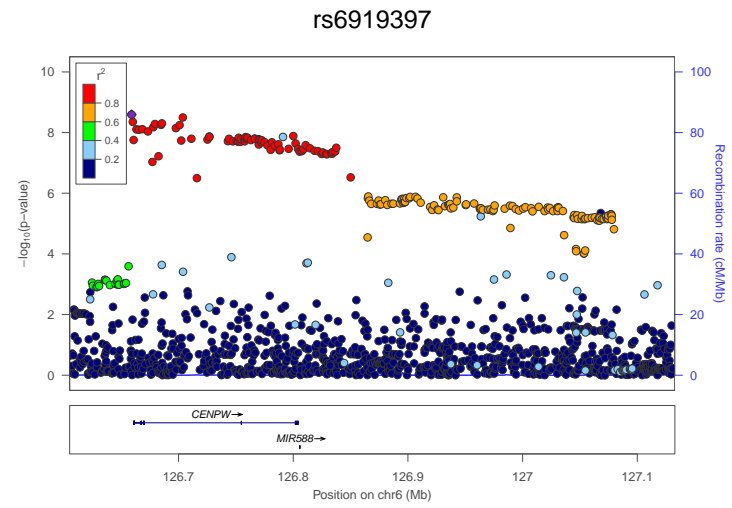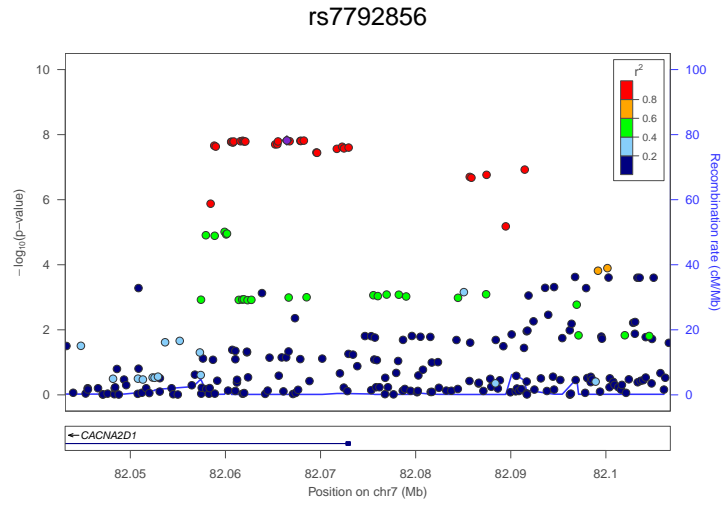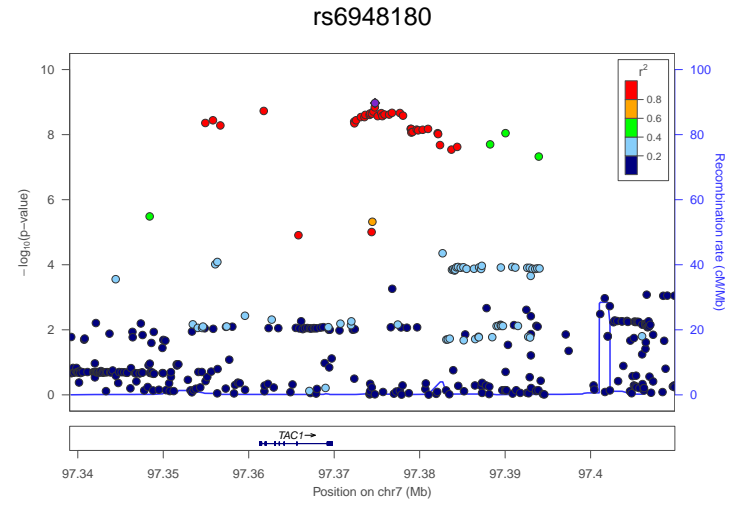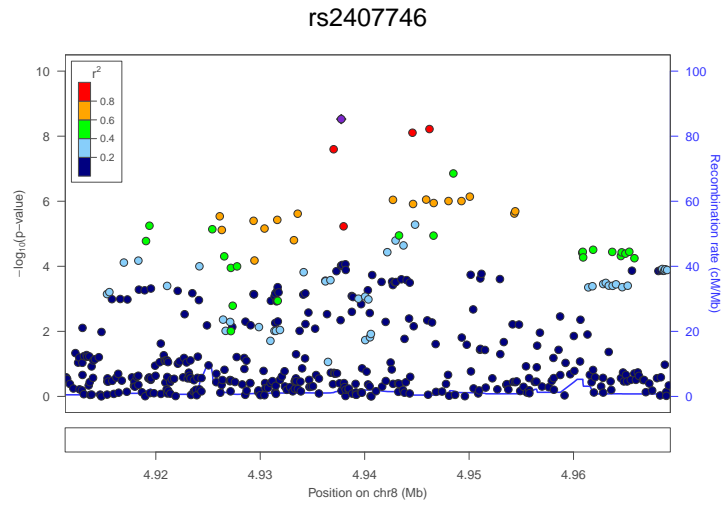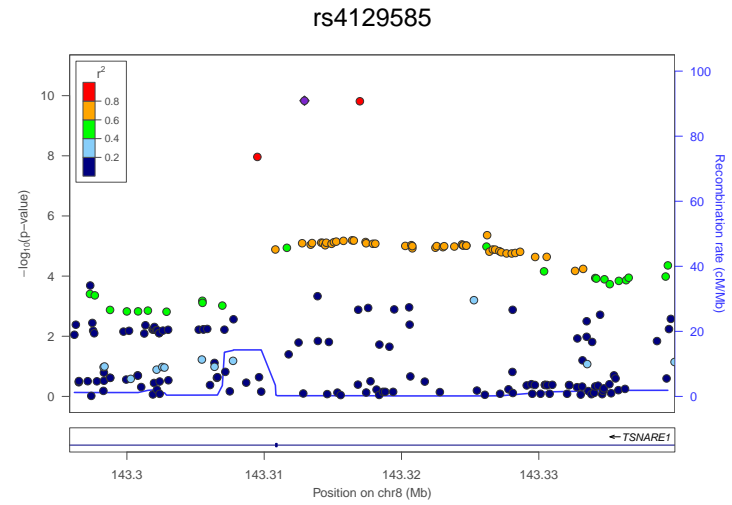

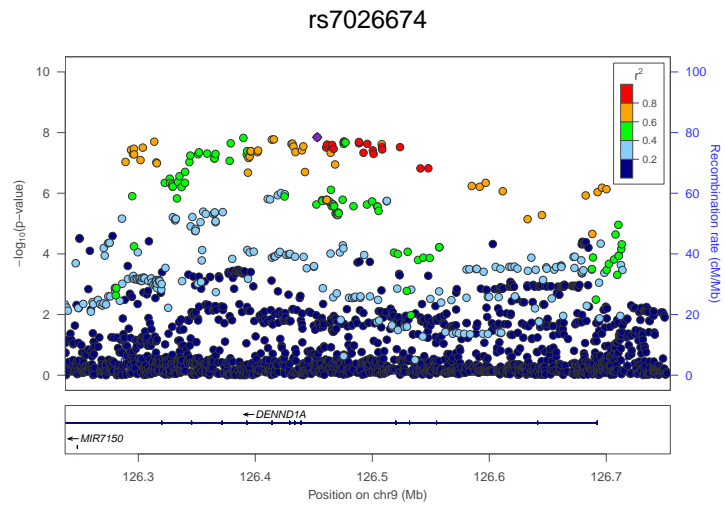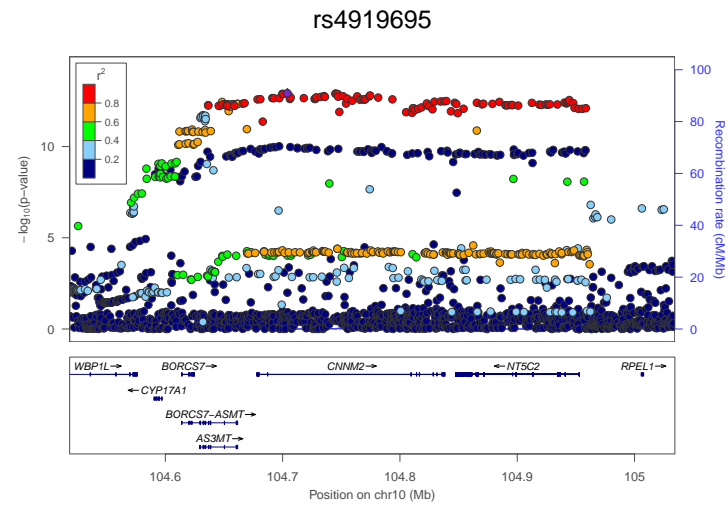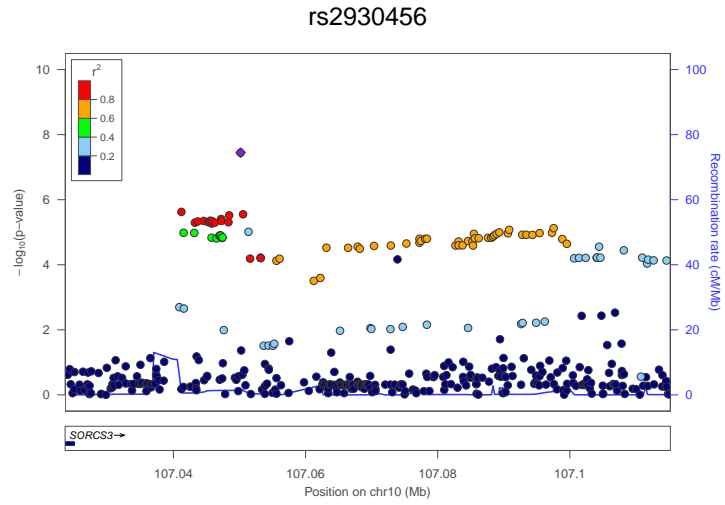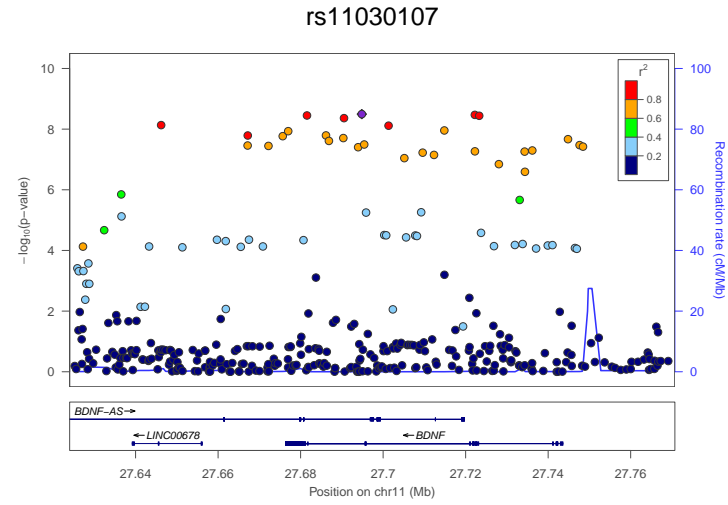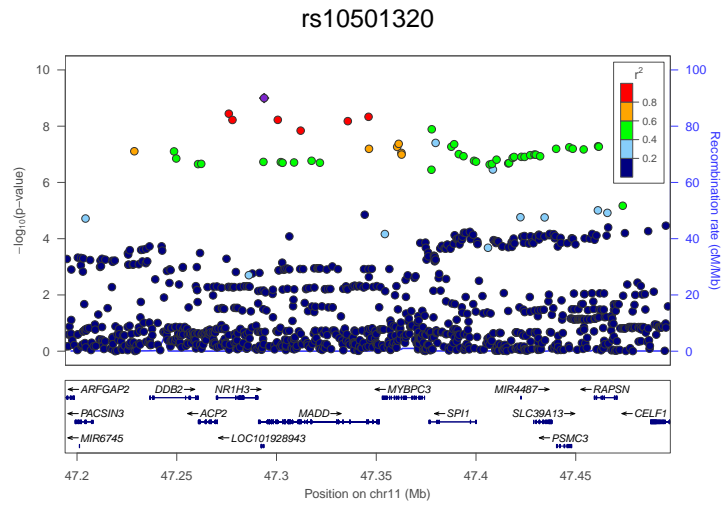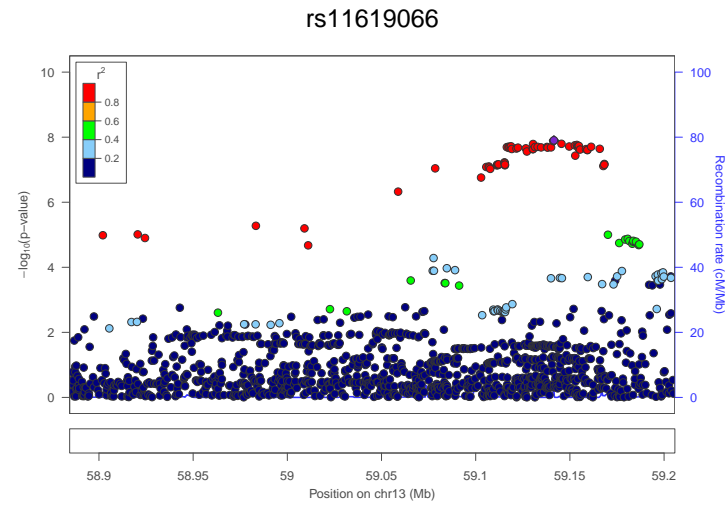

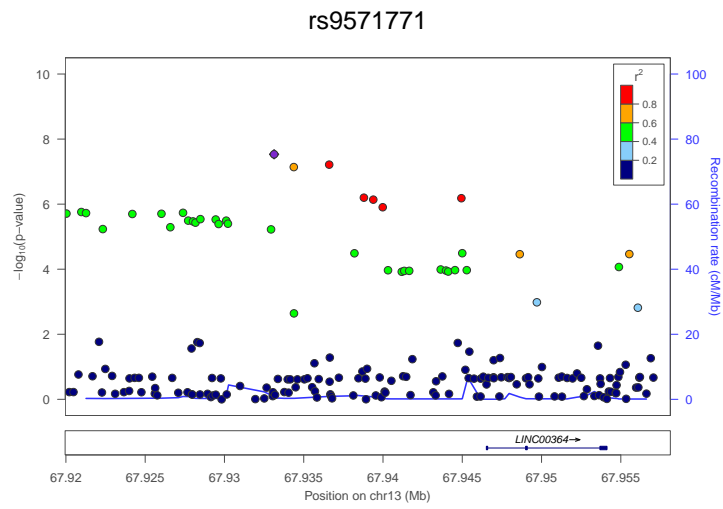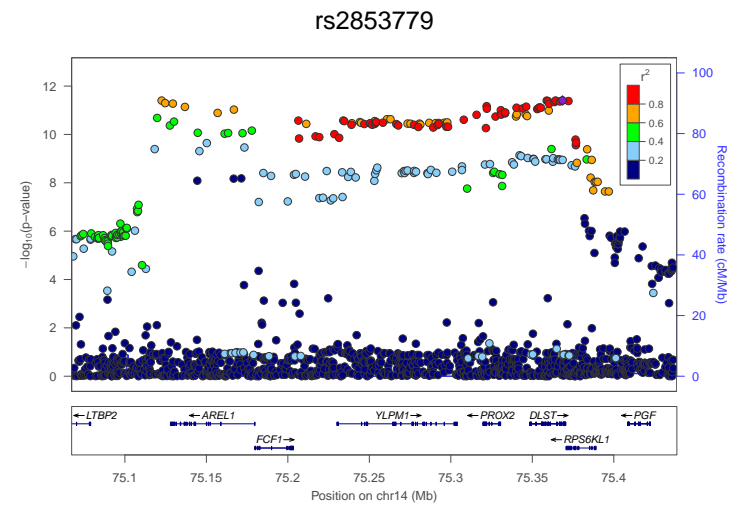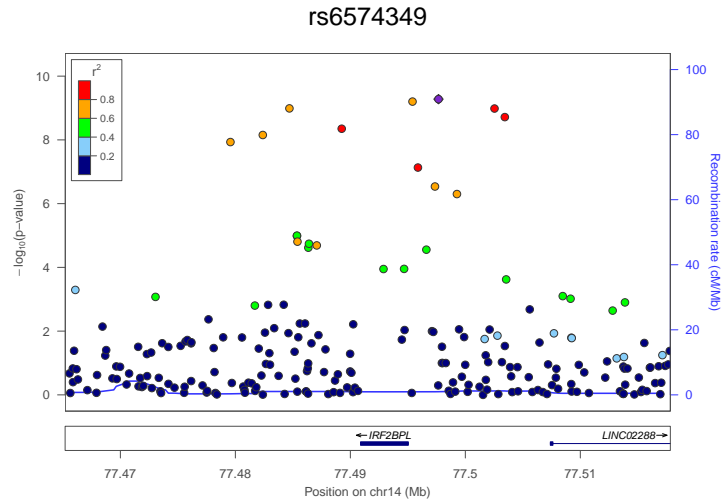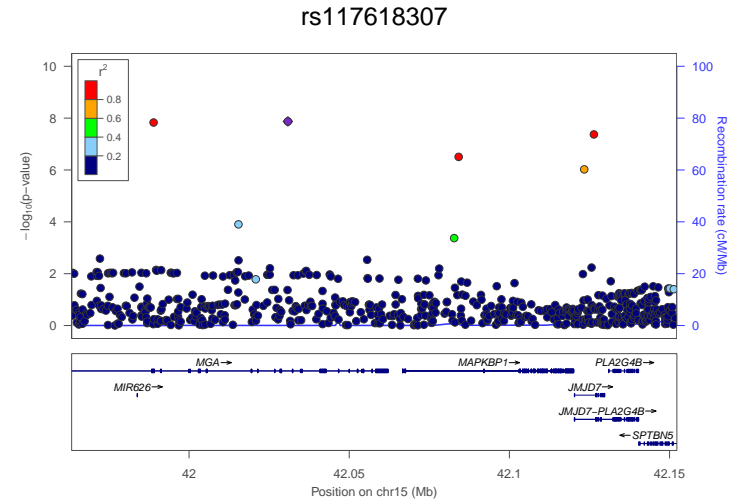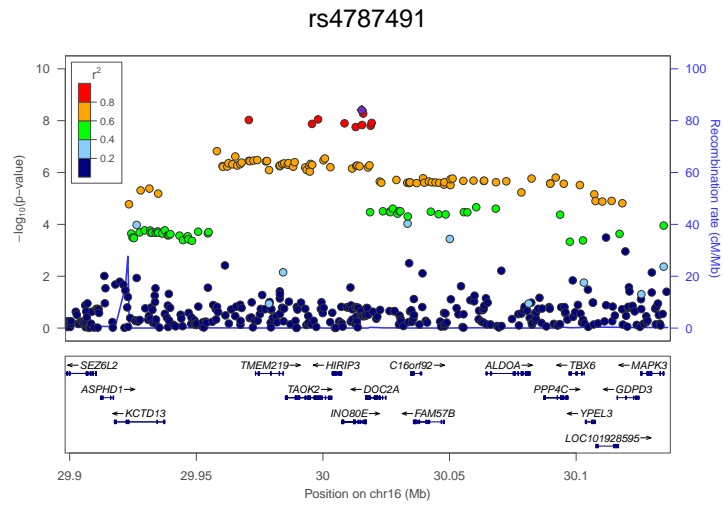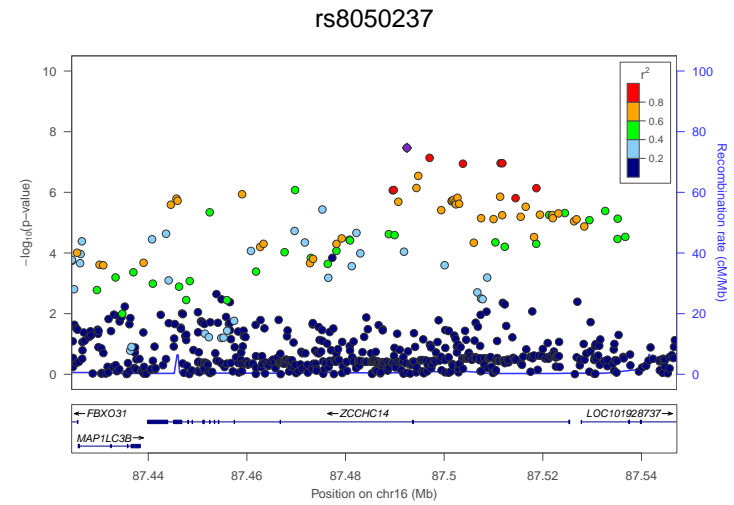

rs17884466

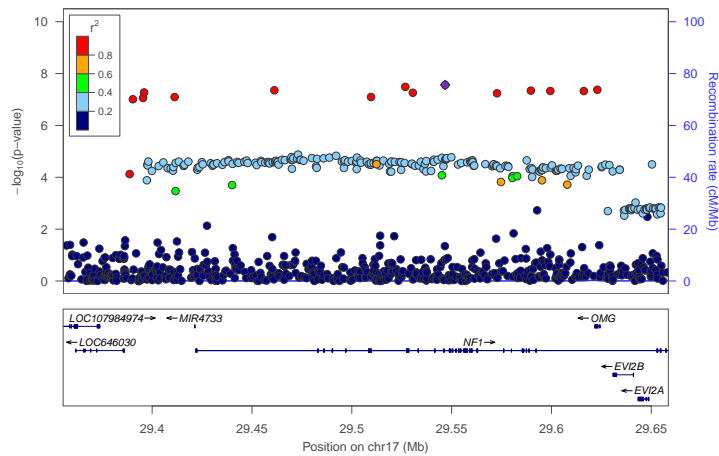

rs62062288

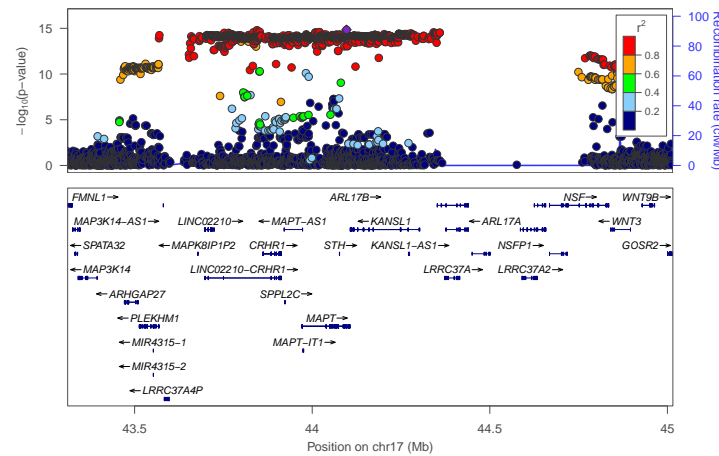

rs1427041

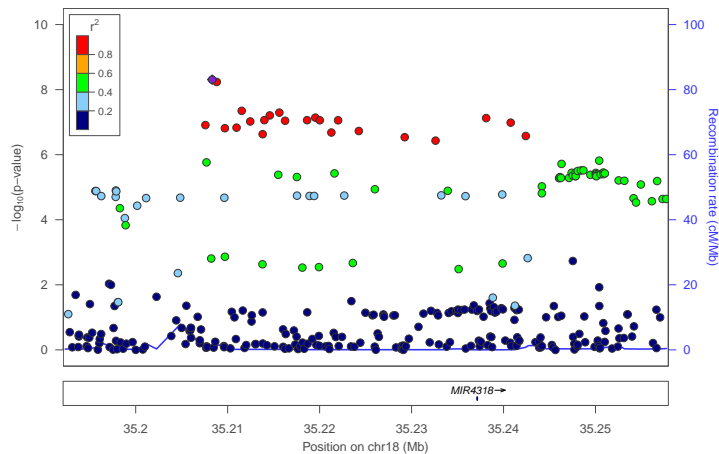

rs62212171

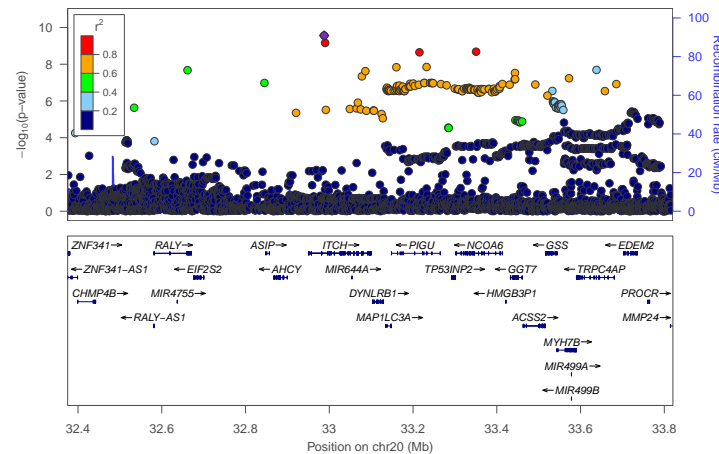

rs2205129

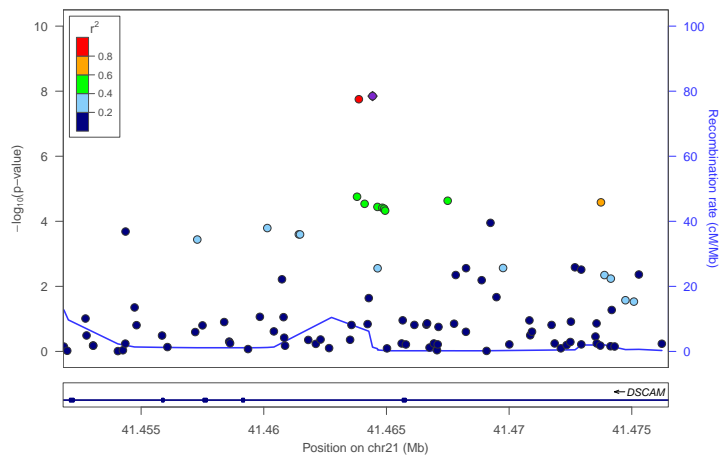

rs5758209

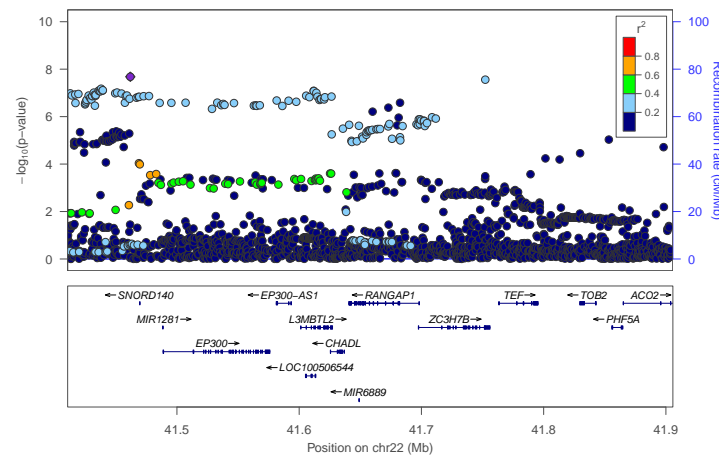

**Supplementary Figure 10. Regional plots of GWA analyses of item NERV-FEEL.**

The  $y$ -axis represents the negative logarithm (base 10) of the SNP  $P$  value and the  $x$ -axis the position on the chromosome, with the name and location of genes in the UCSC Genome Browser in the bottom panel. The SNP with the lowest  $P$  value in the region is marked by a purple diamond. The colors of the other SNPs indicate the  $r^2$  of these SNPs with the lead SNP, with grey color indicating SNPs below the user-defined  $r^2$ . Plots are generated with LocusZoom. See **Supplementary Data 2** for an overview of all lead SNPs for which a regional plot is presented above. For excluded loci (see **Methods**; **Supplementary Data 3-4**) the rsID's are marked yellow.

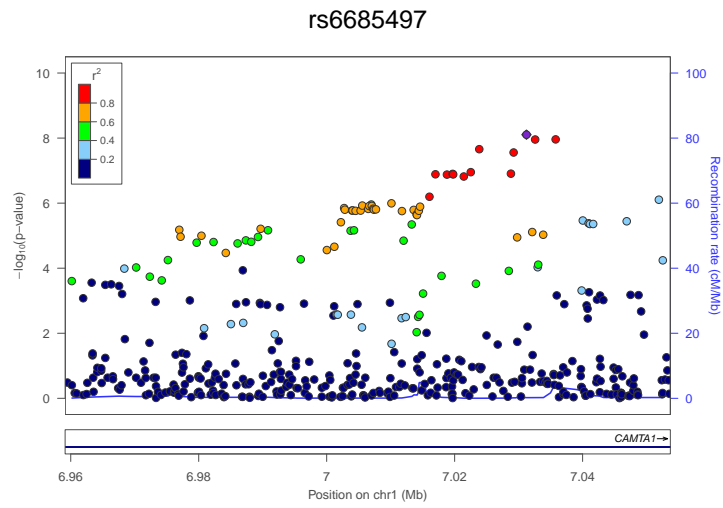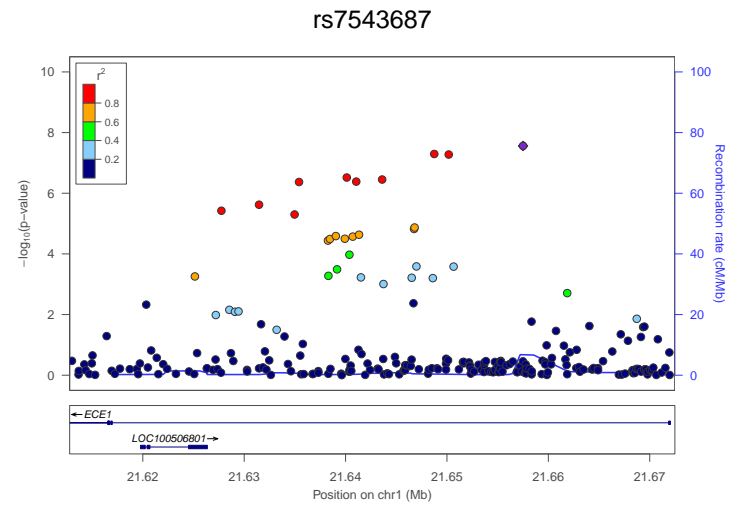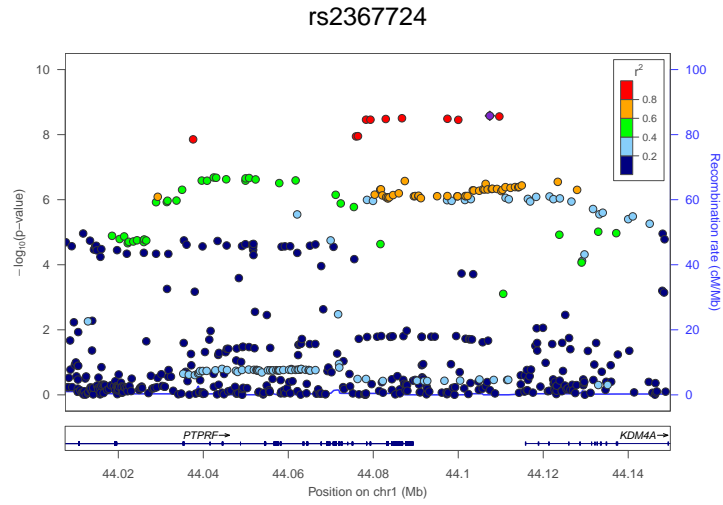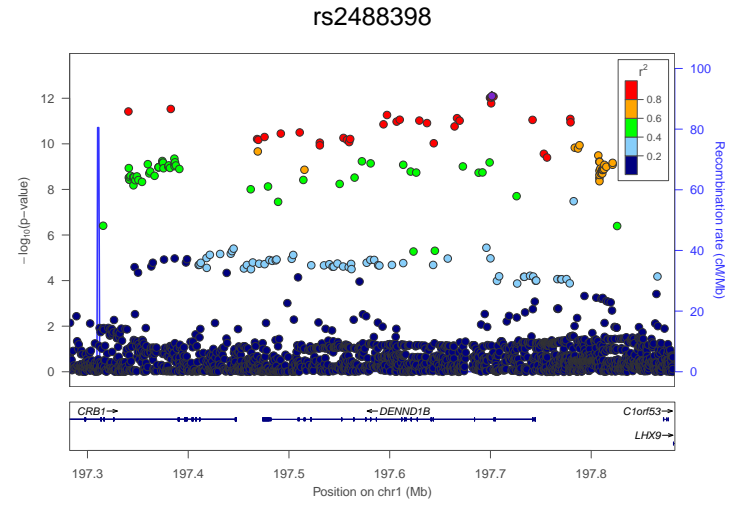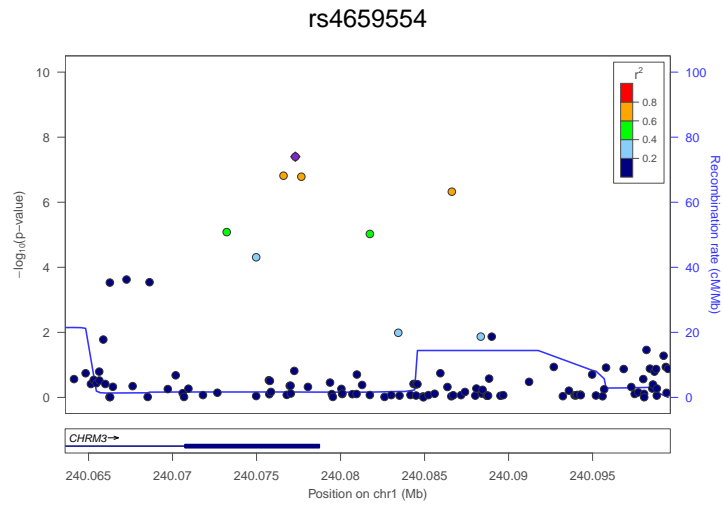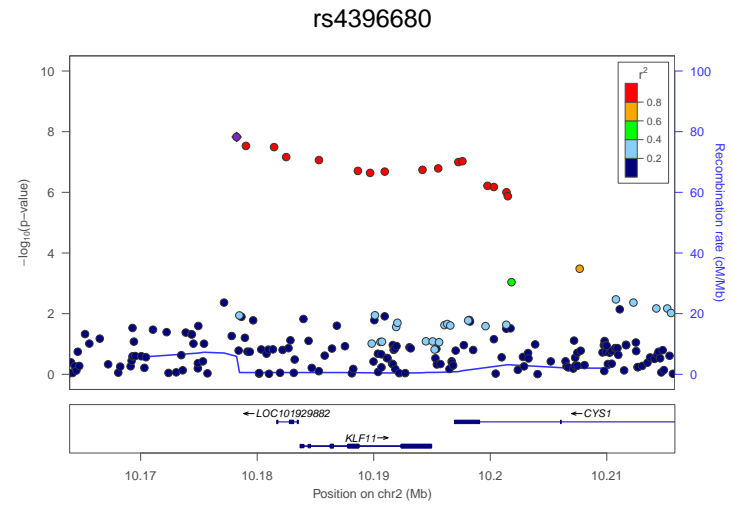

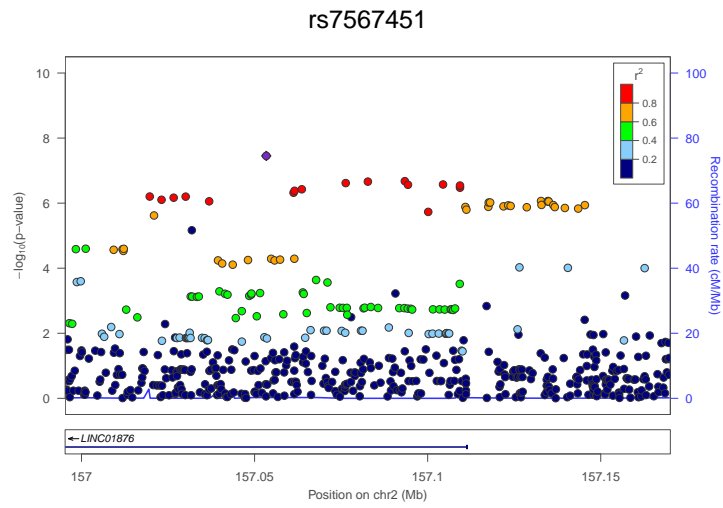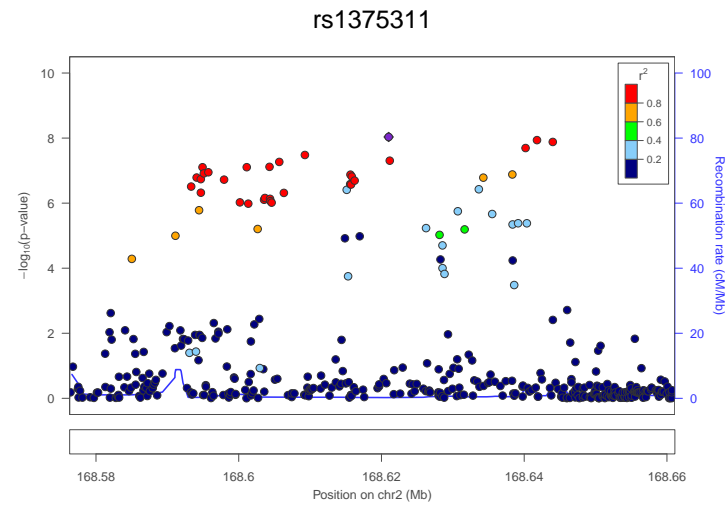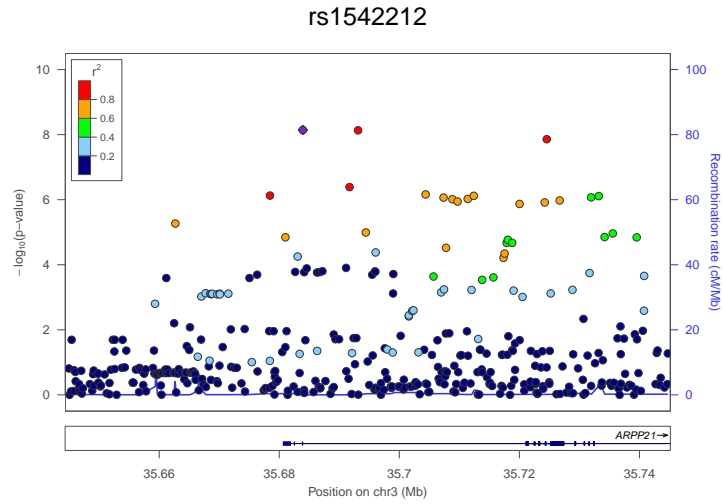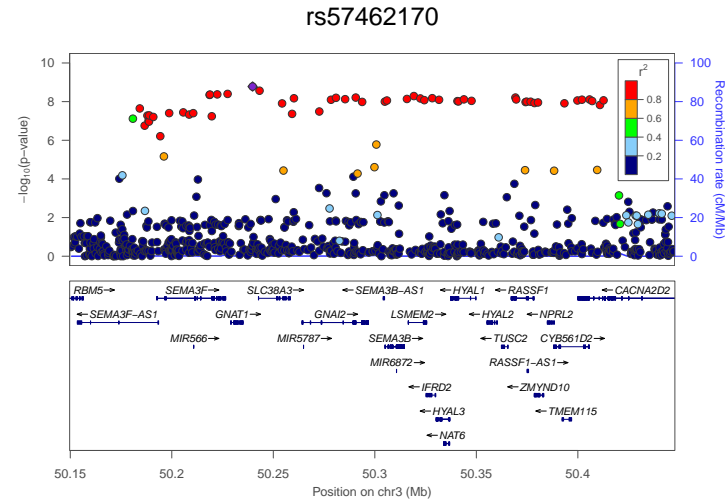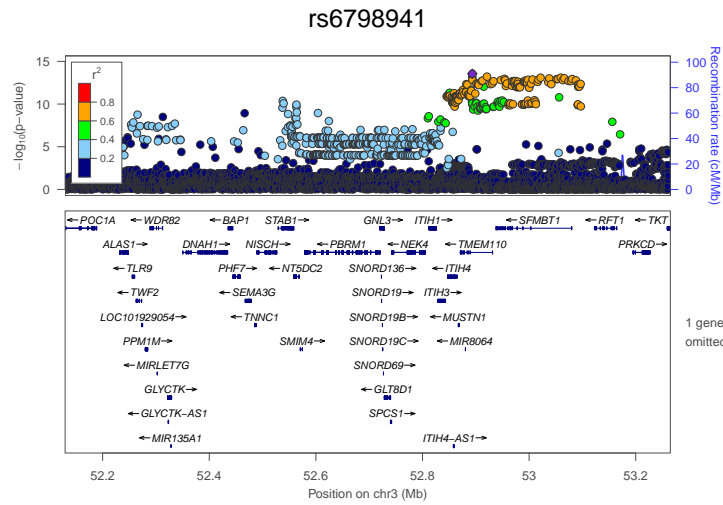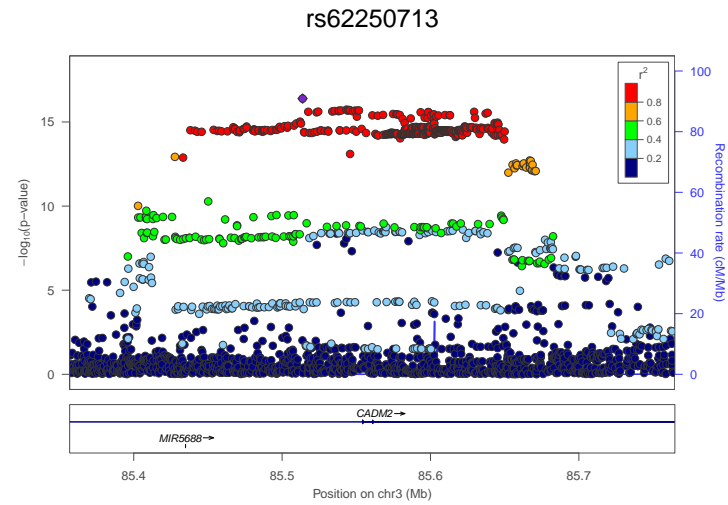

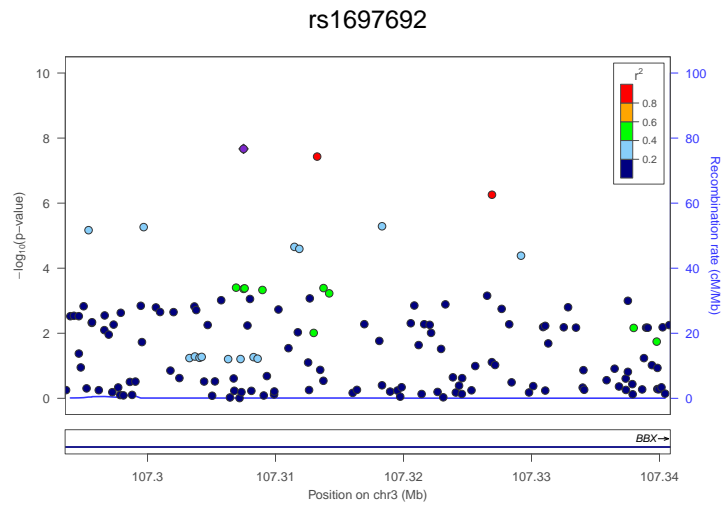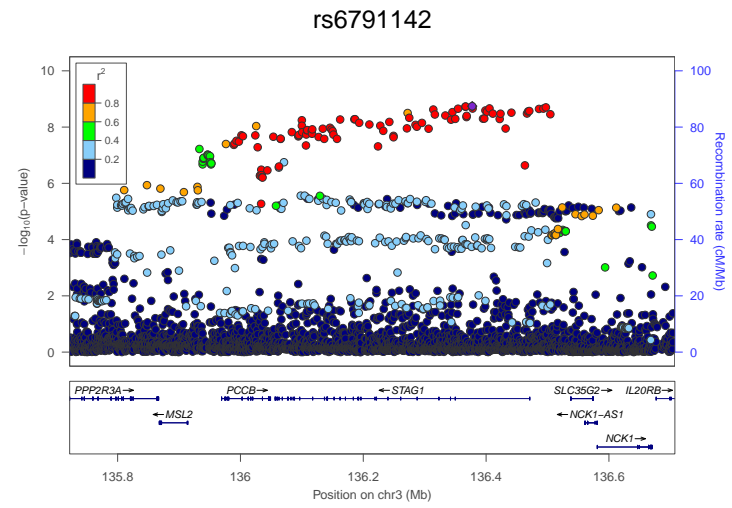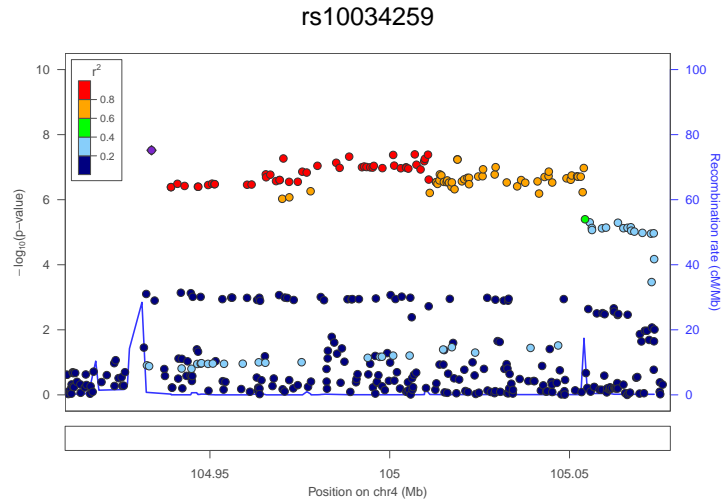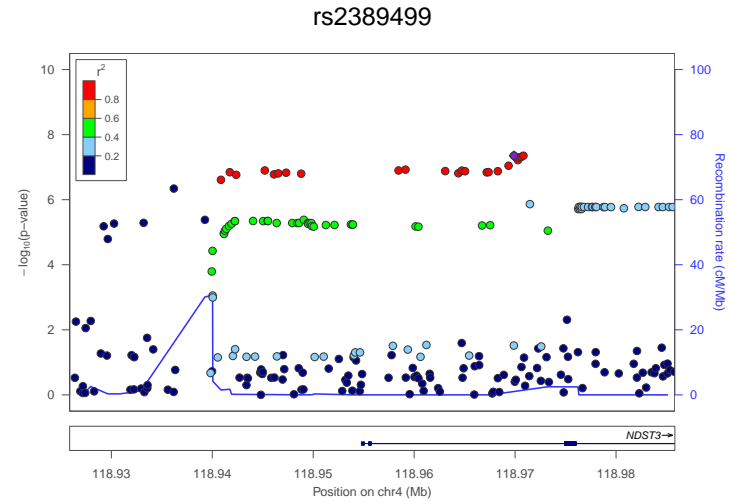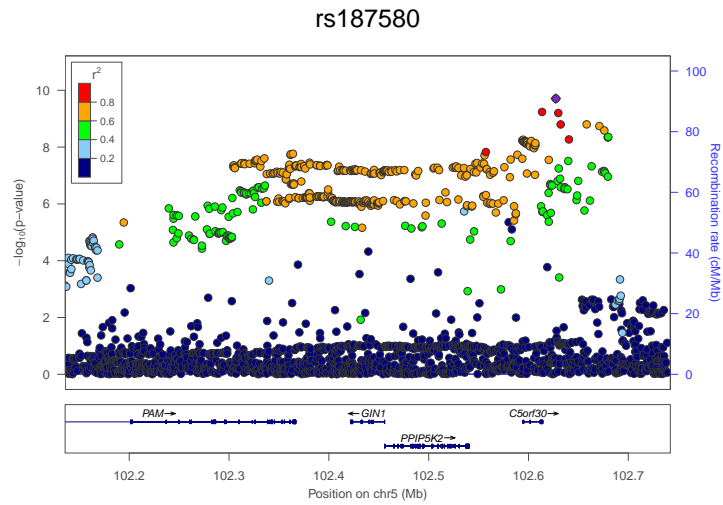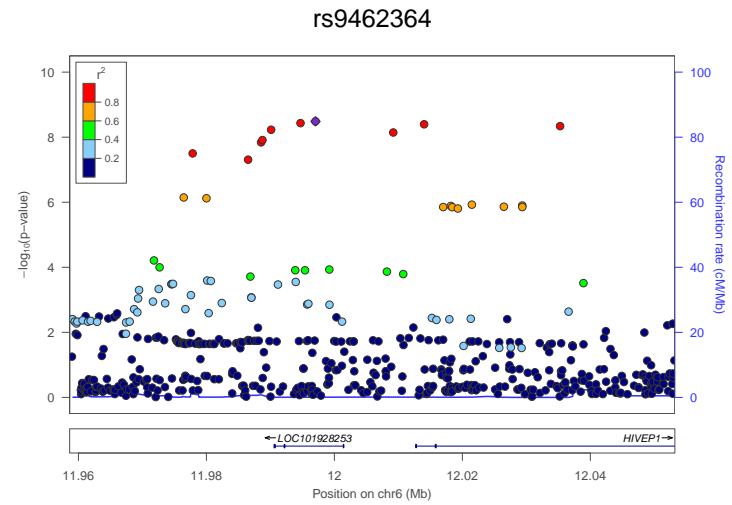



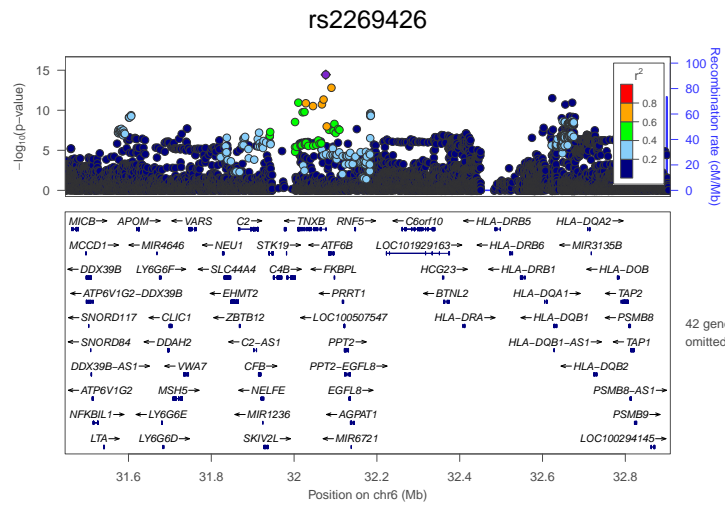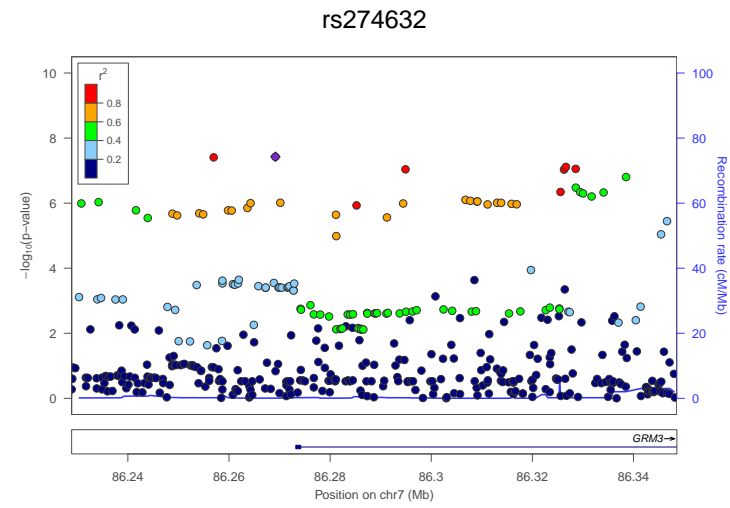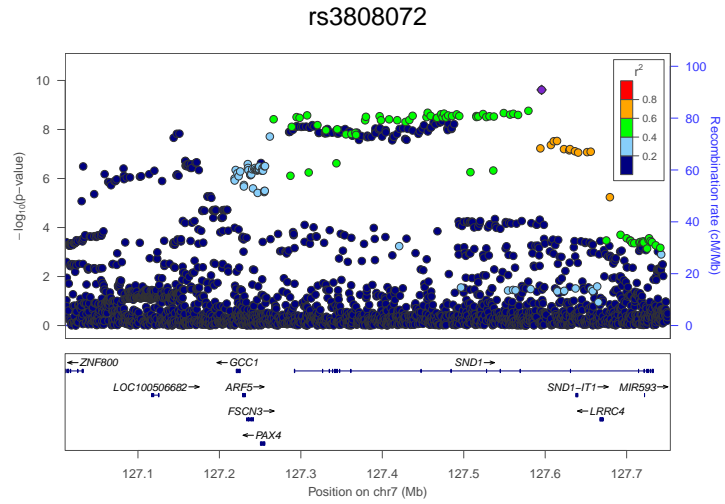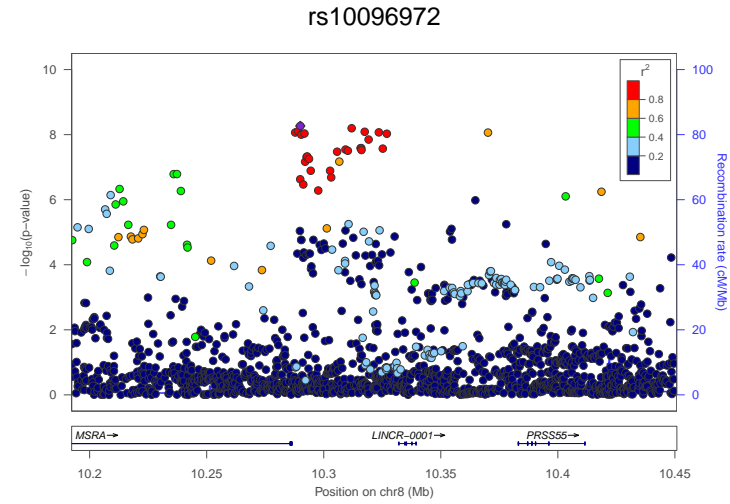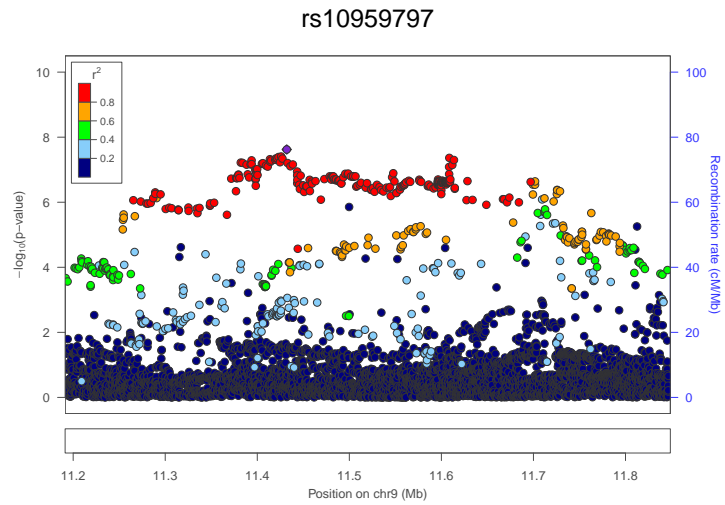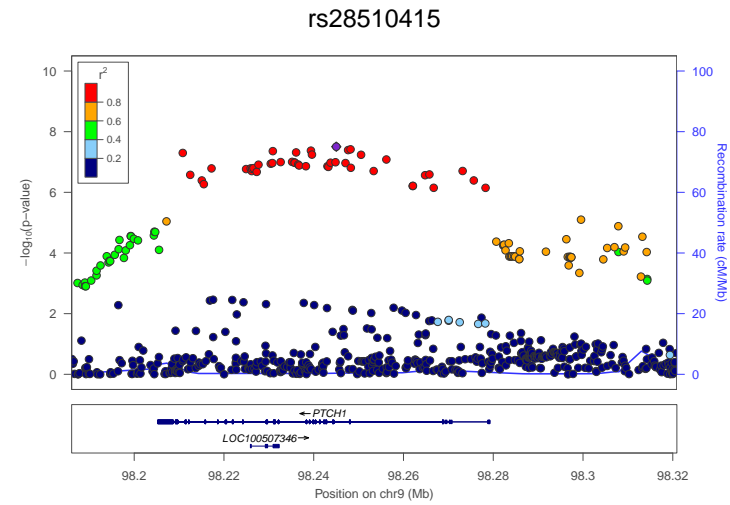

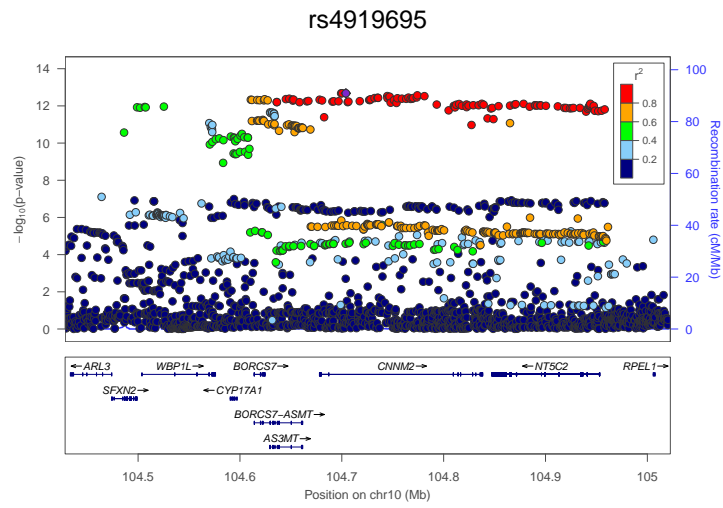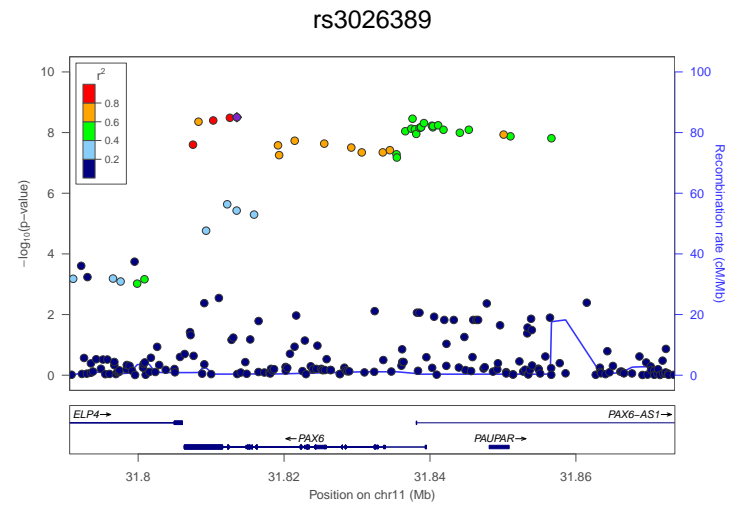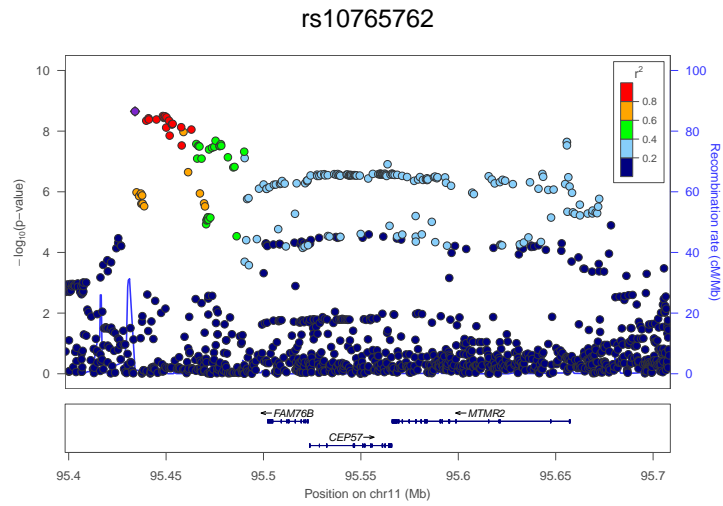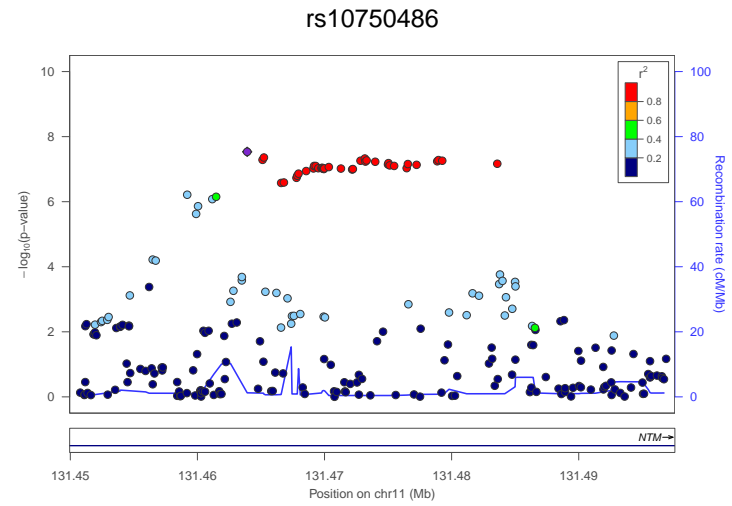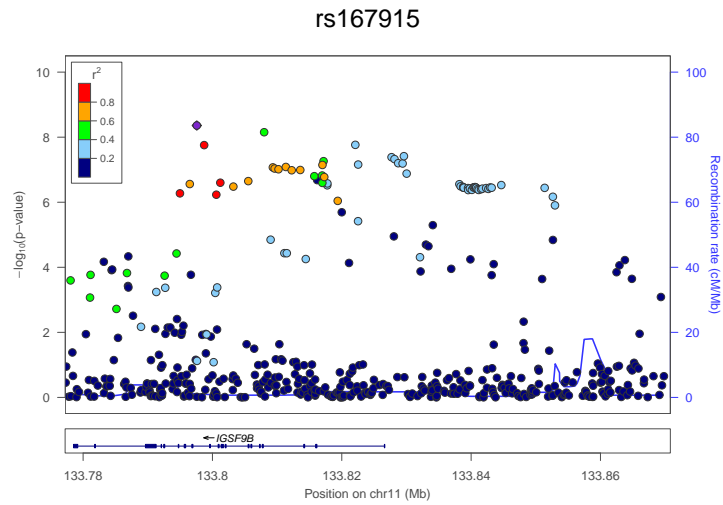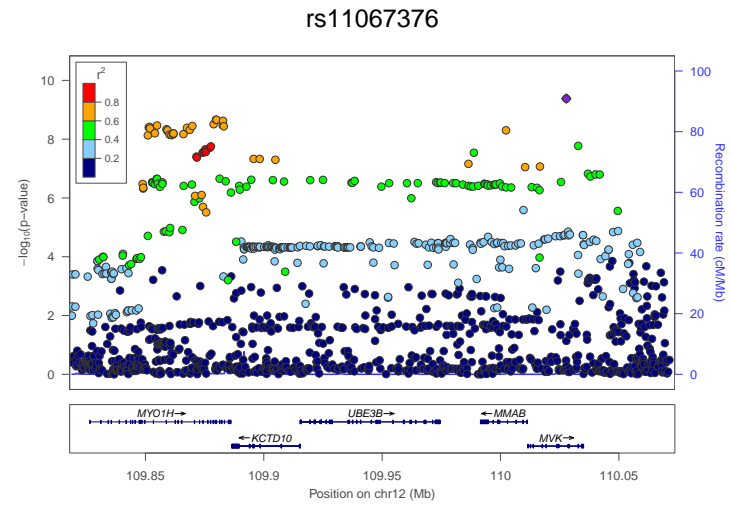

rs61957597

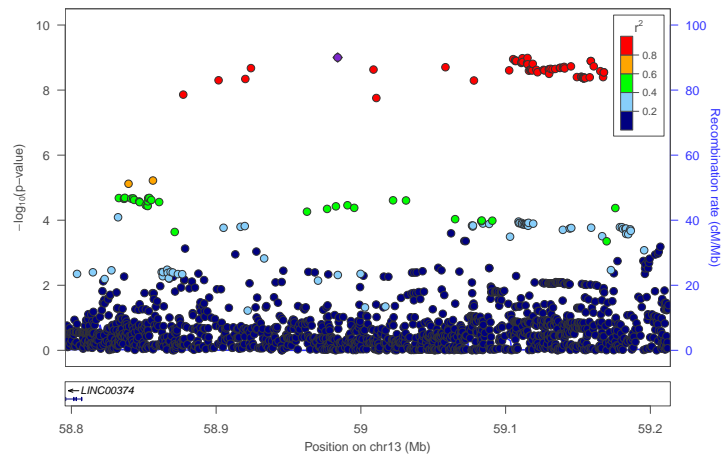

rs7152906

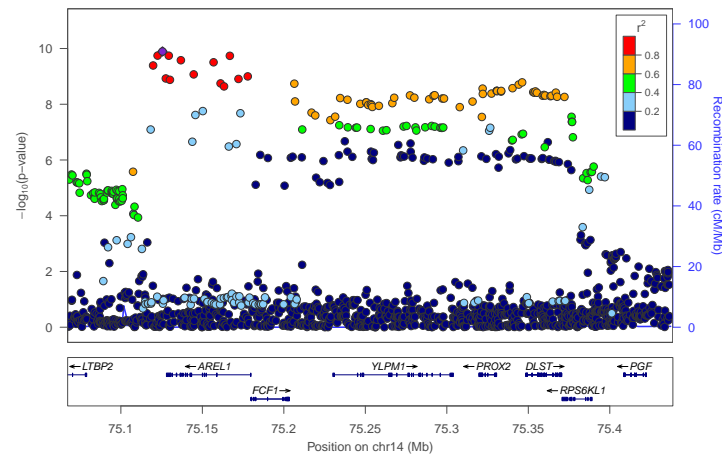

rs55997507

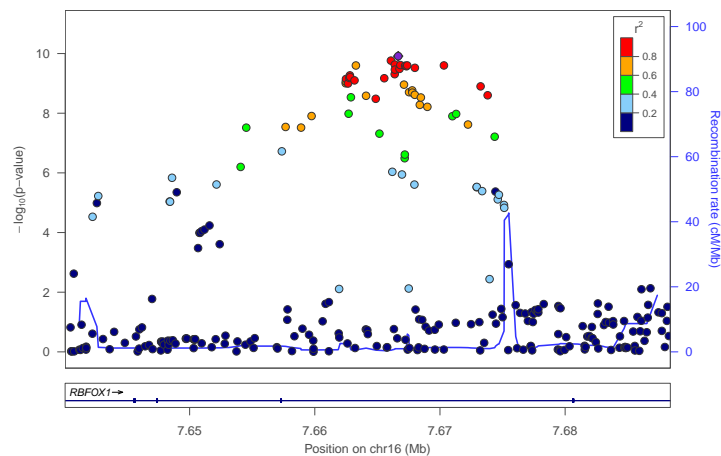

rs17688916

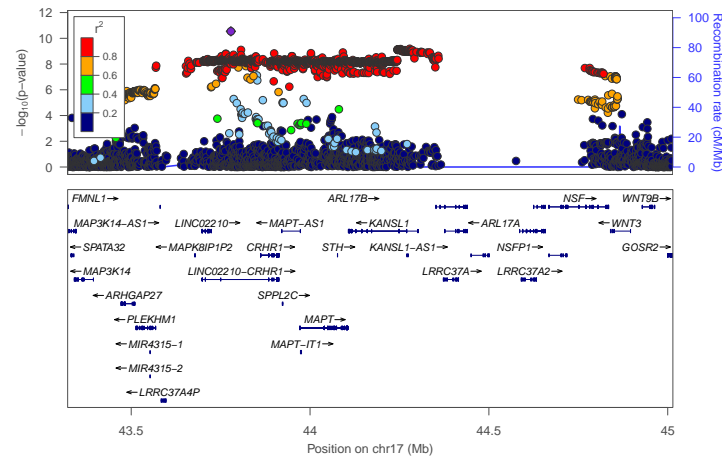

rs72893199

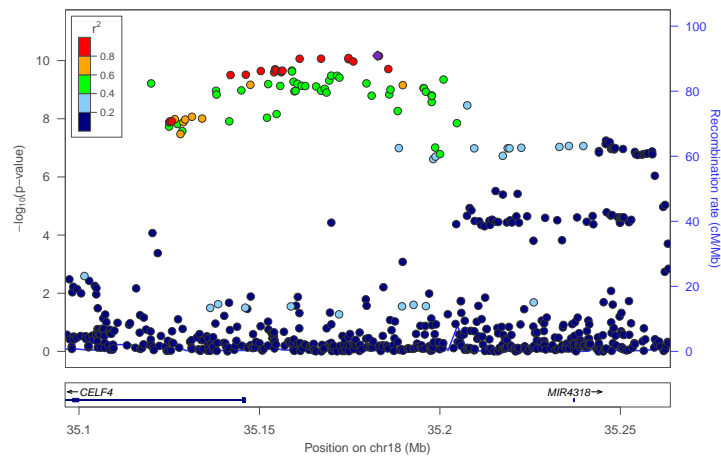

rs7228159

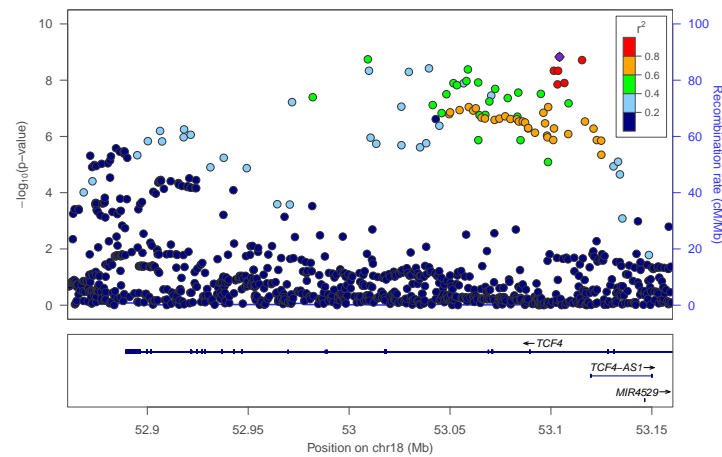

rs58084604

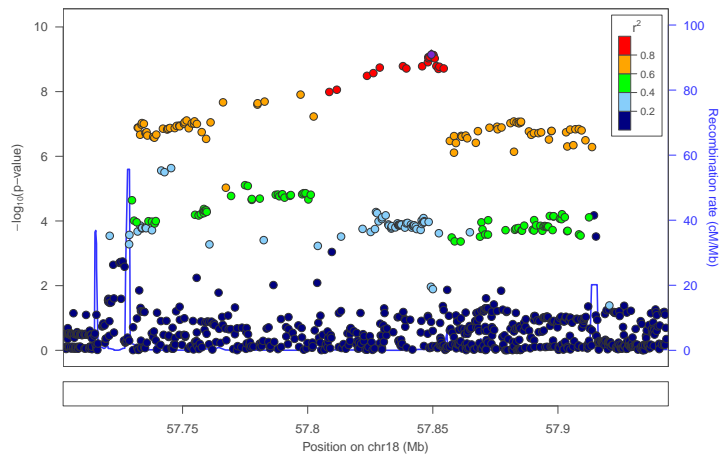

rs116962250

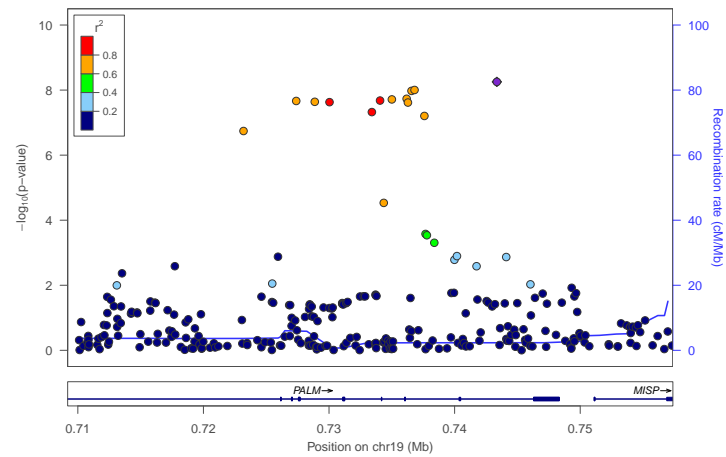

rs13054099

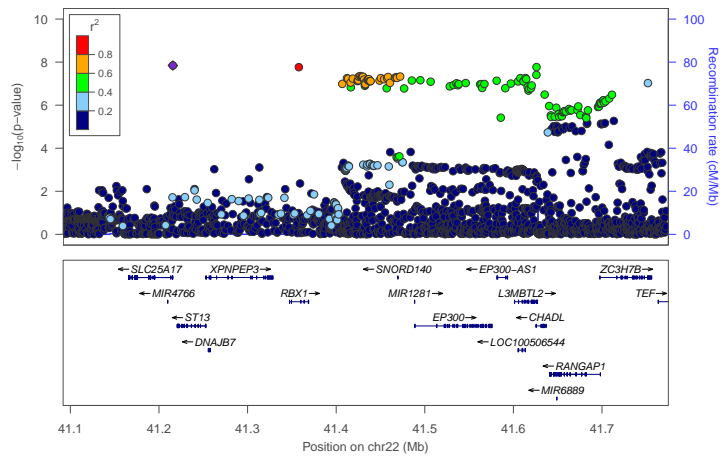

**Supplementary Figure 11. Regional plots of GWA analyses of item WORRY.**

The  $y$ -axis represents the negative logarithm (base 10) of the SNP  $P$  value and the  $x$ -axis the position on the chromosome, with the name and location of genes in the UCSC Genome Browser in the bottom panel. The SNP with the lowest  $P$  value in the region is marked by a purple diamond. The colors of the other SNPs indicate the  $r^2$  of these SNPs with the lead SNP, with grey color indicating SNPs below the user-defined  $r^2$ . Plots are generated with LocusZoom. See **Supplementary Data 2** for an overview of all lead SNPs for which a regional plot is presented above.

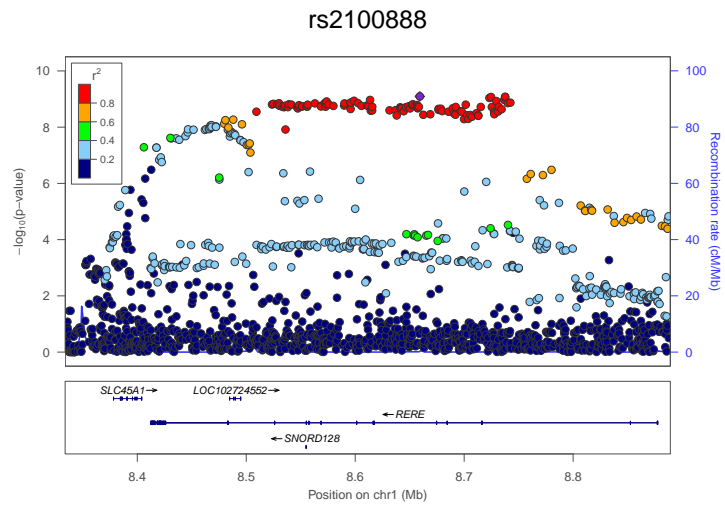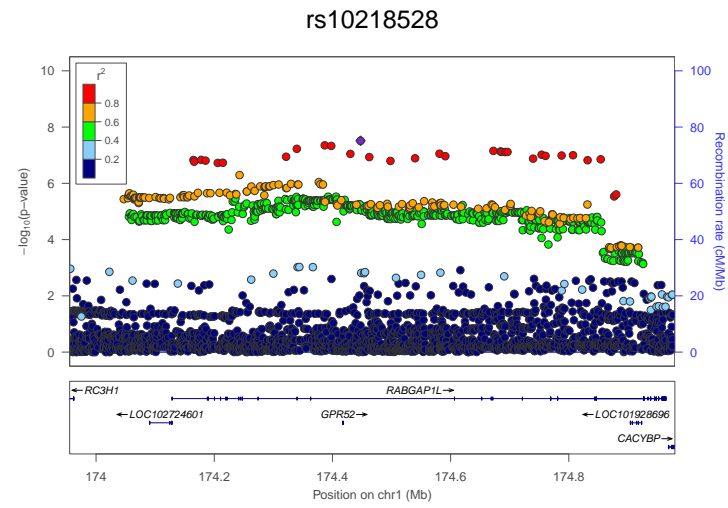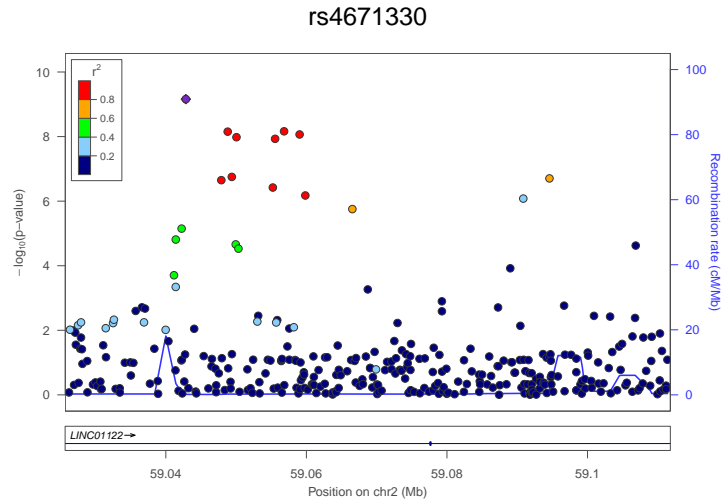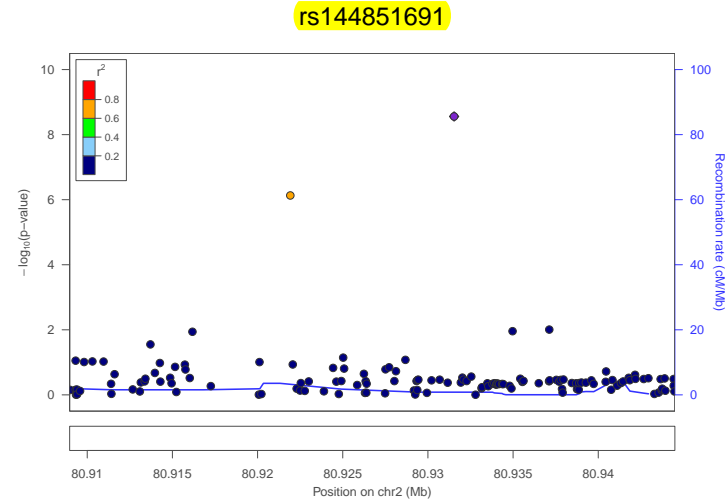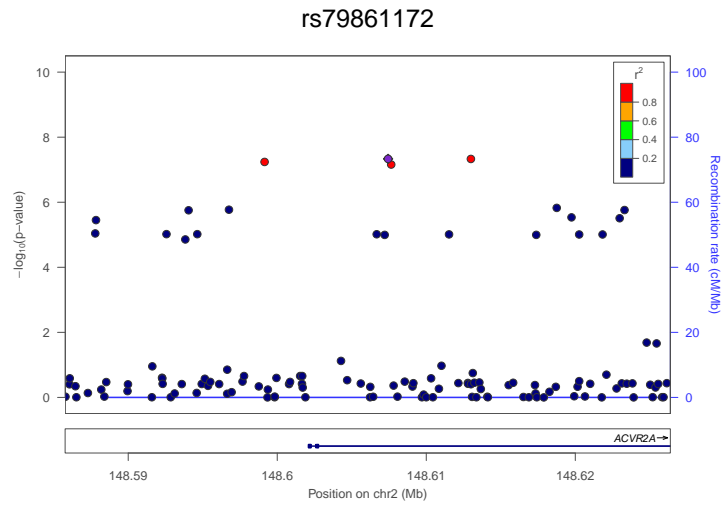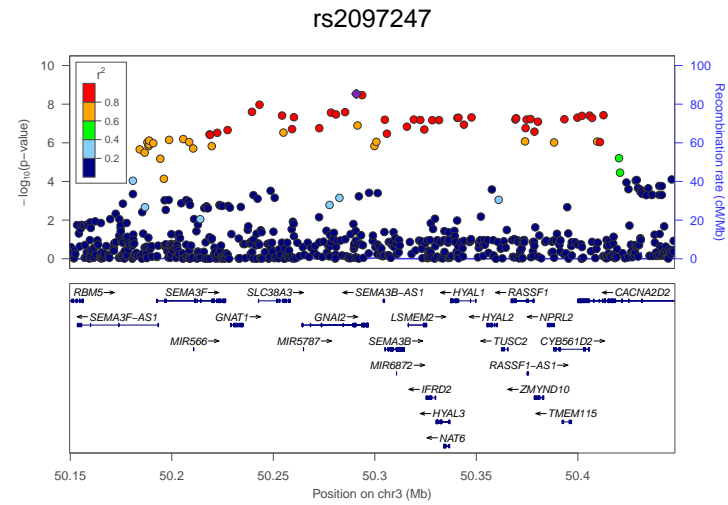

rs9811546

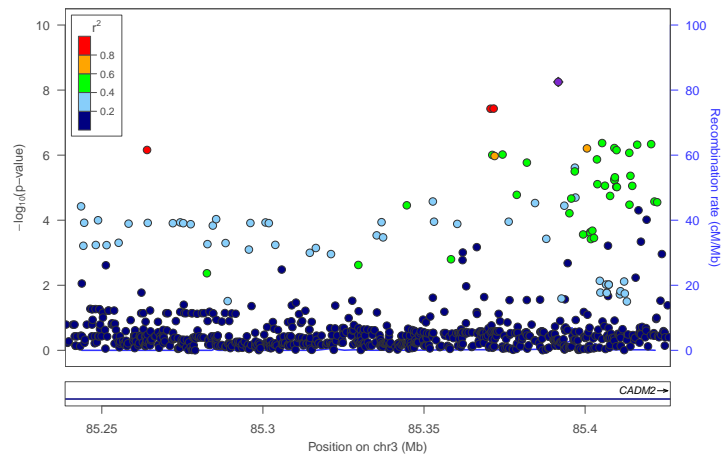

rs6891955

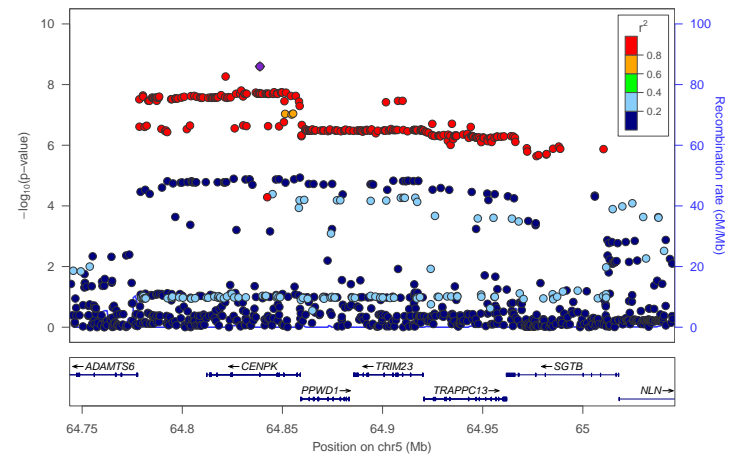

rs28738966

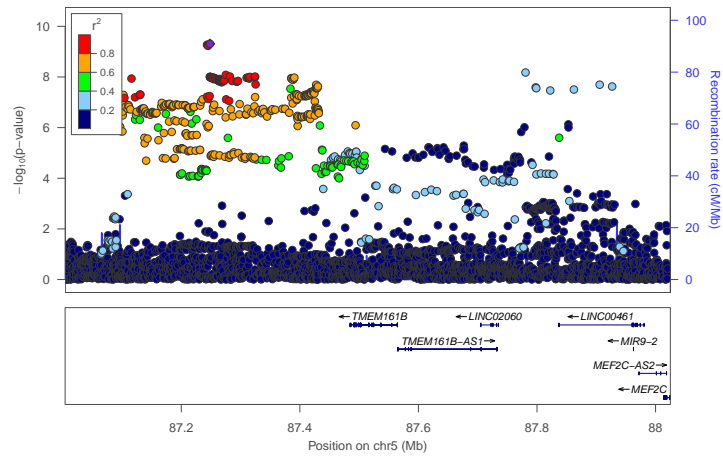

rs6883228

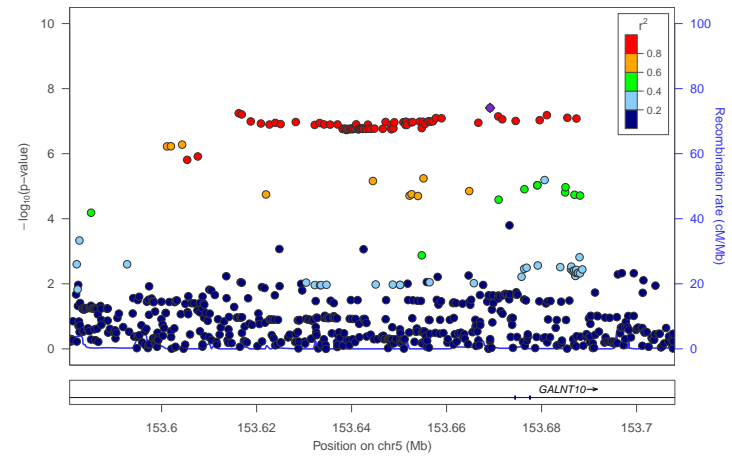

rs1147851

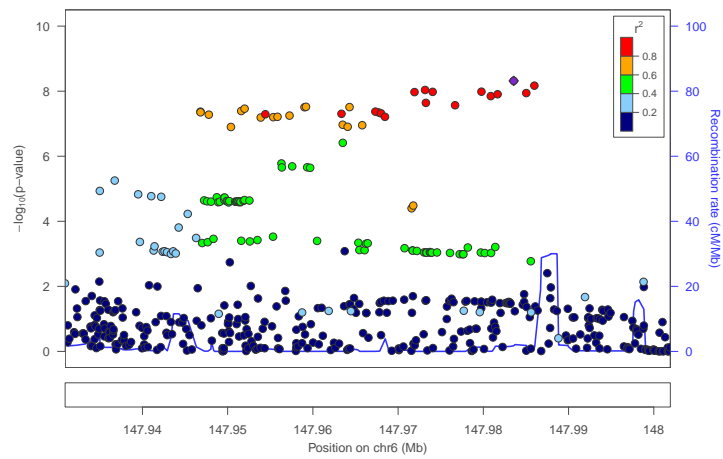

rs11509880

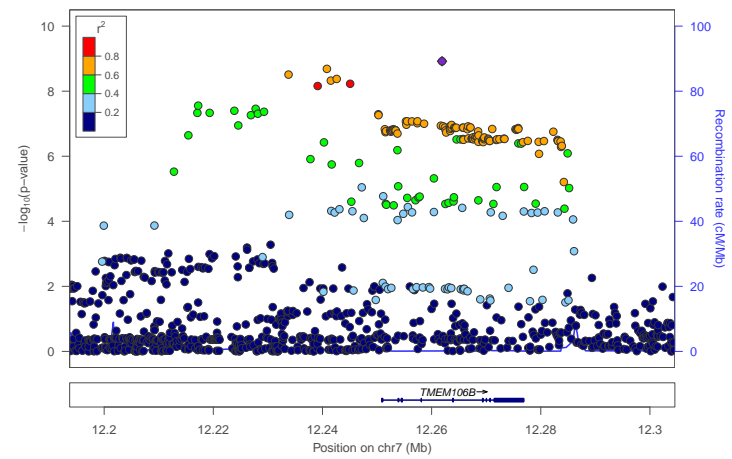

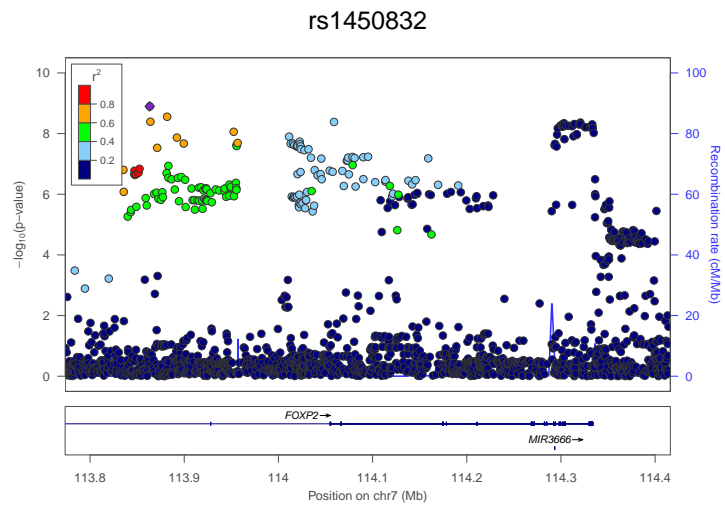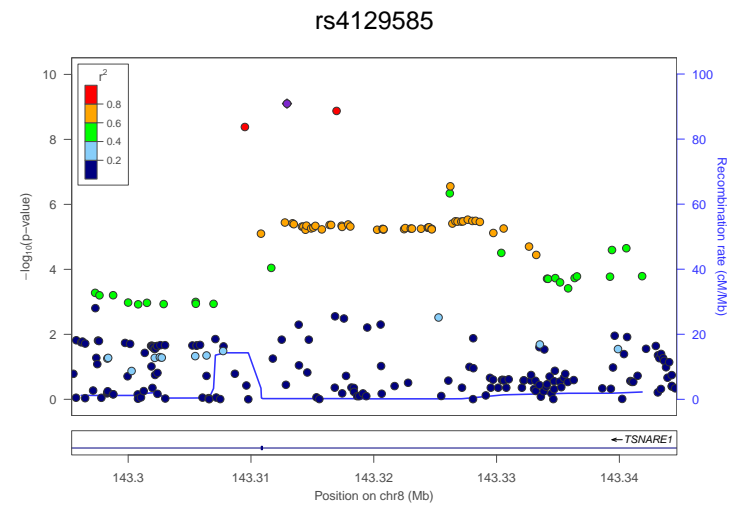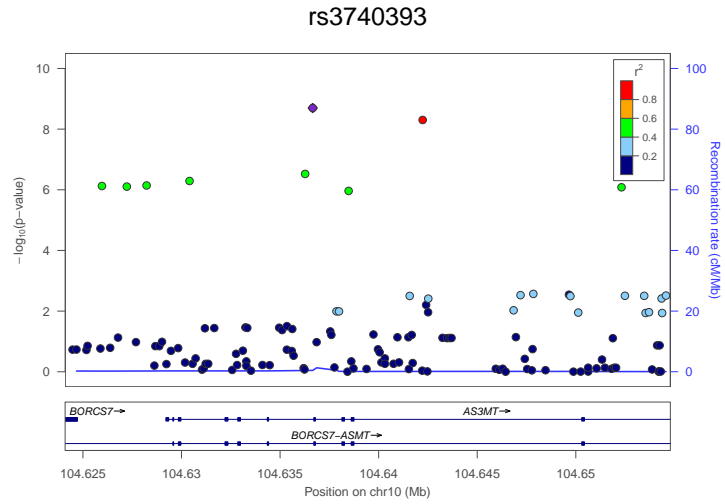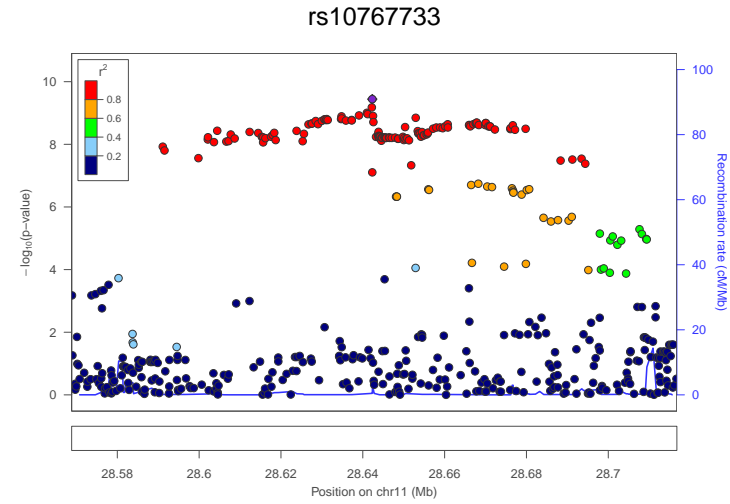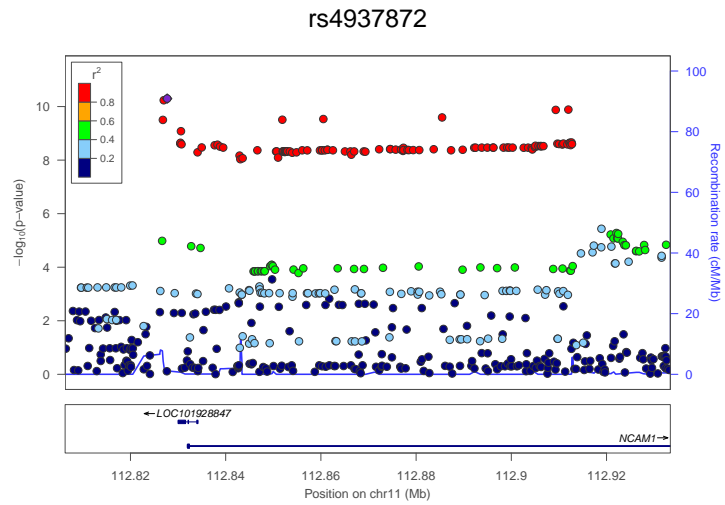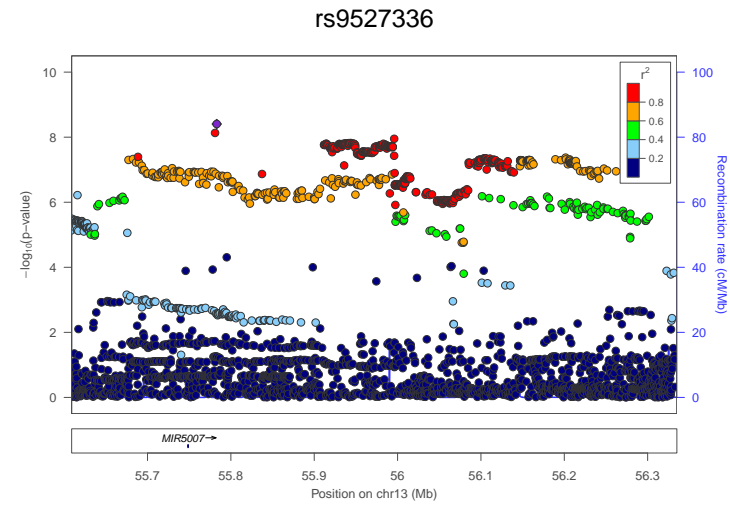



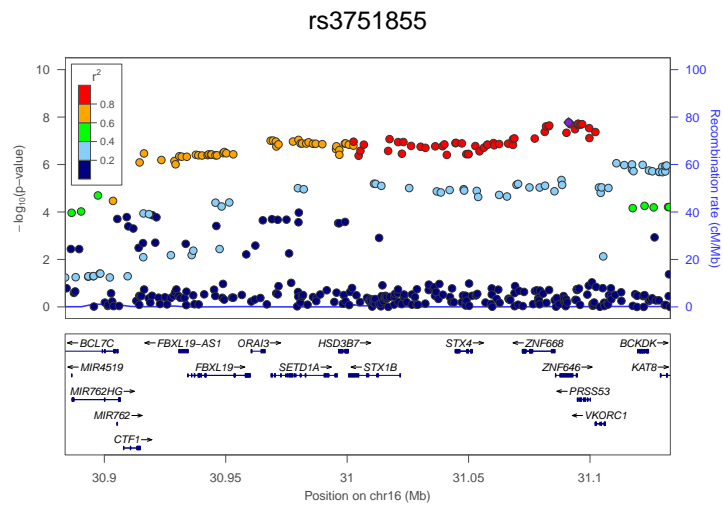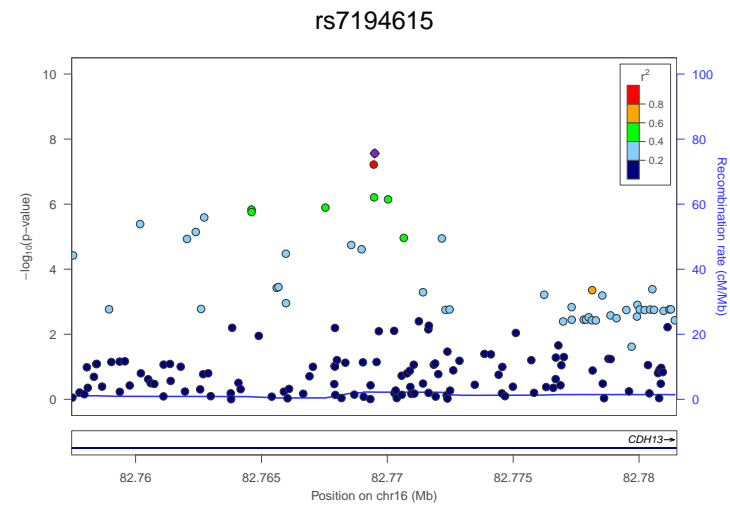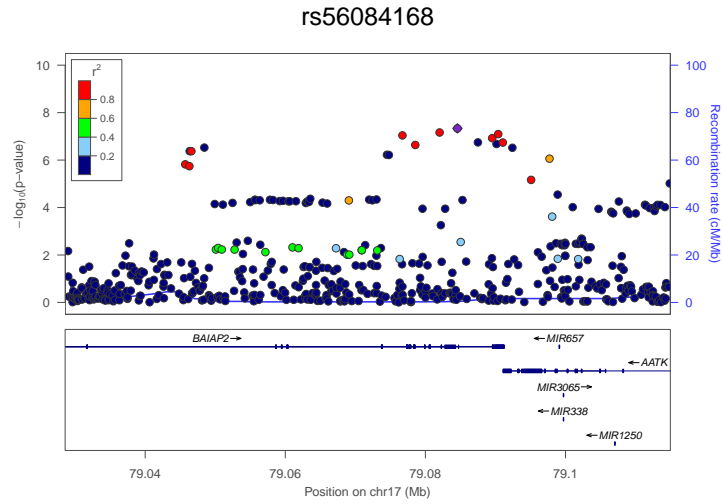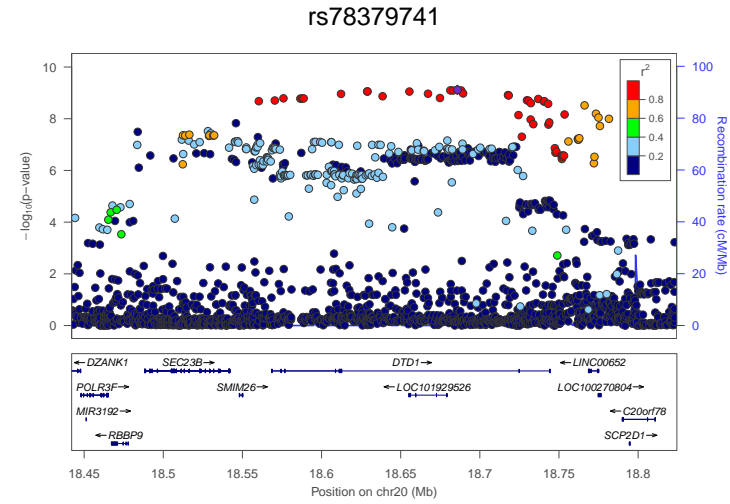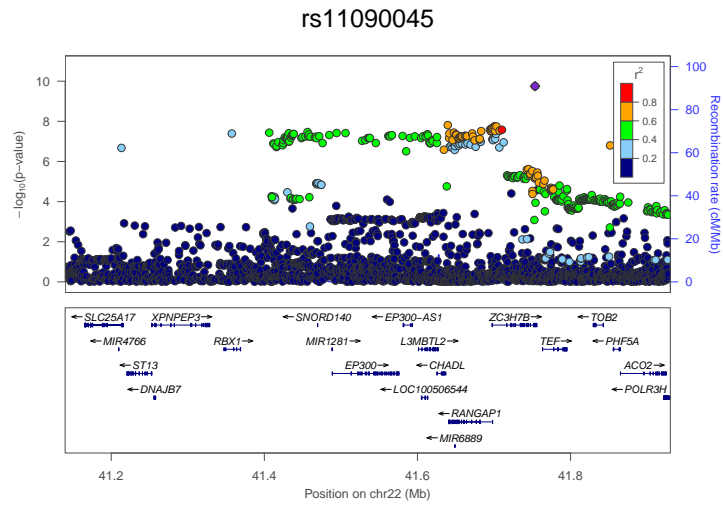

**Supplementary Figure 12. Regional plots of GWA analyses of item TENSE.**

The  $y$ -axis represents the negative logarithm (base 10) of the SNP  $P$  value and the  $x$ -axis the position on the chromosome, with the name and location of genes in the UCSC Genome Browser in the bottom panel. The SNP with the lowest  $P$  value in the region is marked by a purple diamond. The colors of the other SNPs indicate the  $r^2$  of these SNPs with the lead SNP, with grey color indicating SNPs below the user-defined  $r^2$ . Plots are generated with LocusZoom. See **Supplementary Data 2** for an overview of all lead SNPs for which a regional plot is presented above. For excluded loci (see **Methods**; **Supplementary Data 3-4**) the rsID's are marked yellow.

rs9854869

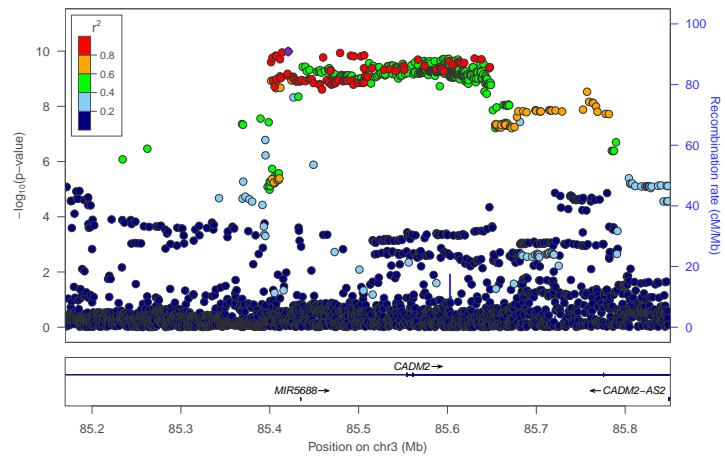

rs6478623

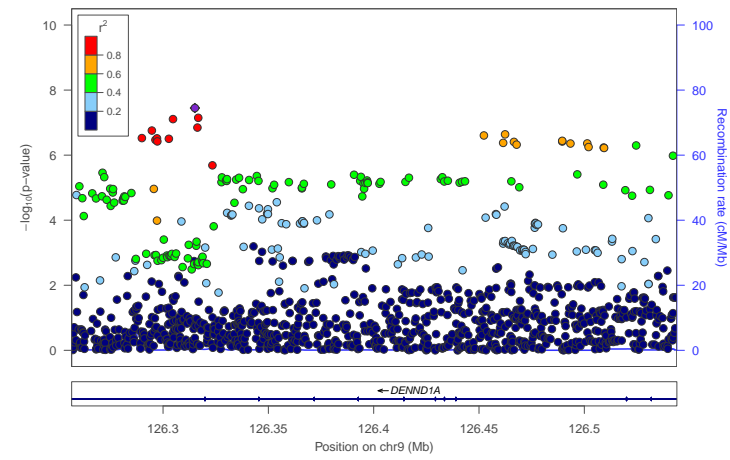

rs12787112

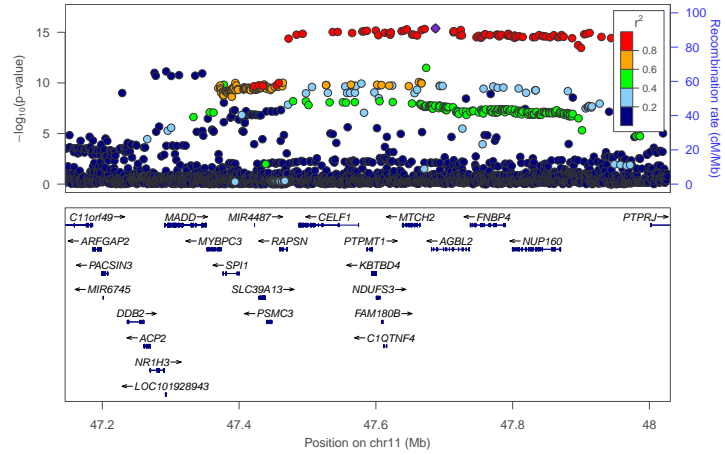

rs2193596

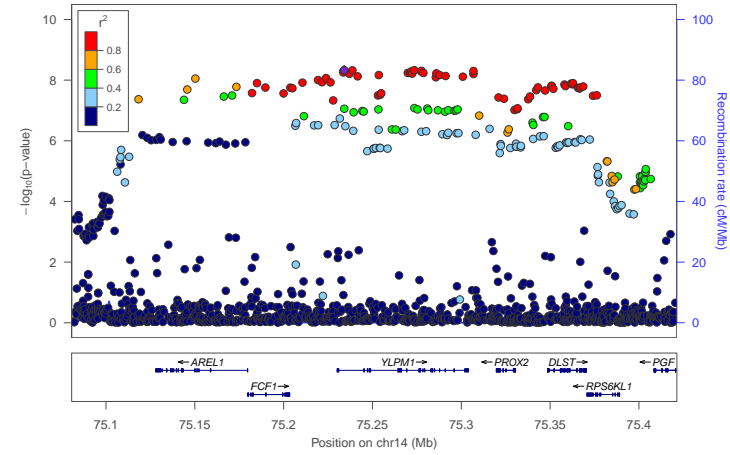

rs62081501

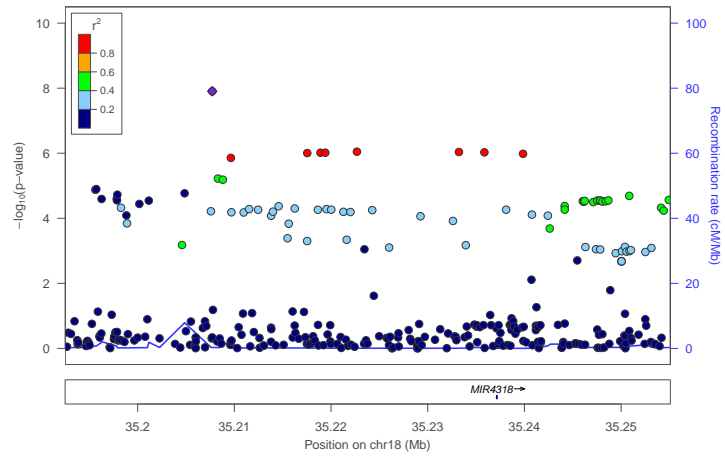

rs11665052

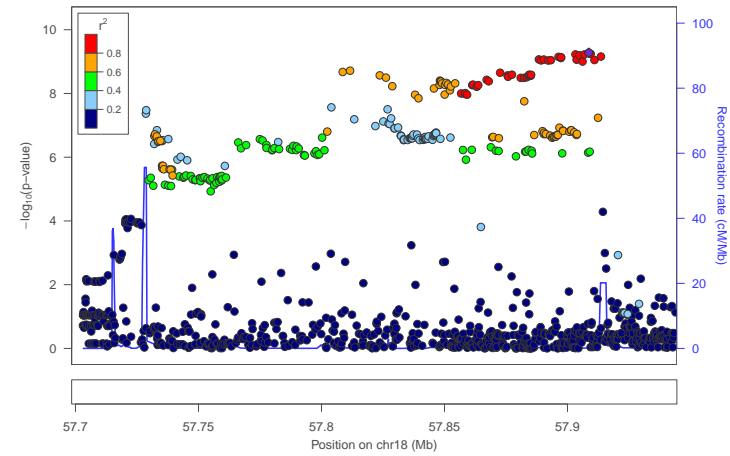

**Supplementary Figure 13. Regional plots of GWA analyses of item SUF-NERV.**

The  $y$ -axis represents the negative logarithm (base 10) of the SNP  $P$  value and the  $x$ -axis the position on the chromosome, with the name and location of genes in the UCSC Genome Browser in the bottom panel. The SNP with the lowest  $P$  value in the region is marked by a purple diamond. The colors of the other SNPs indicate the  $r^2$  of these SNPs with the lead SNP, with grey color indicating SNPs below the user-defined  $r^2$ . Plots are generated with LocusZoom. See **Supplementary Data 2** for an overview of all lead SNPs for which a regional plot is presented above.

rs12028465

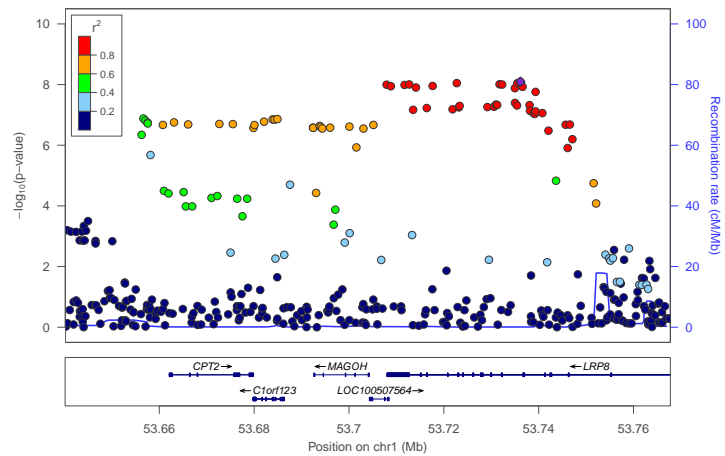

rs4652676

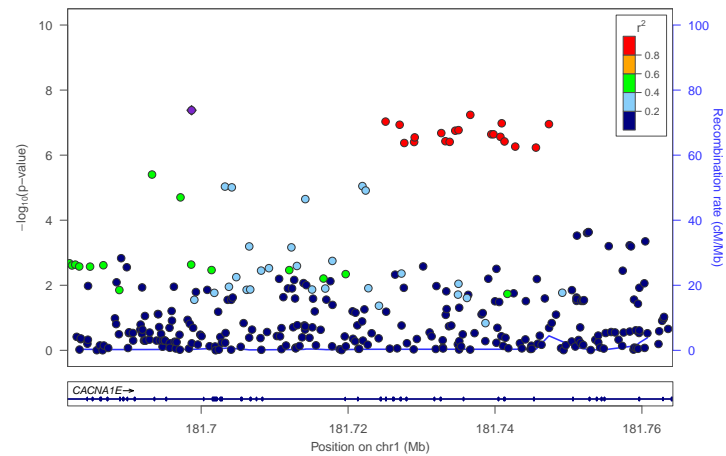

rs2488401

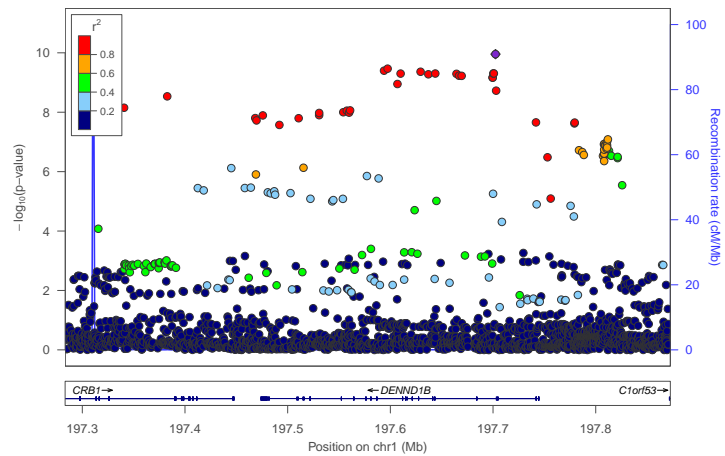

rs10210652

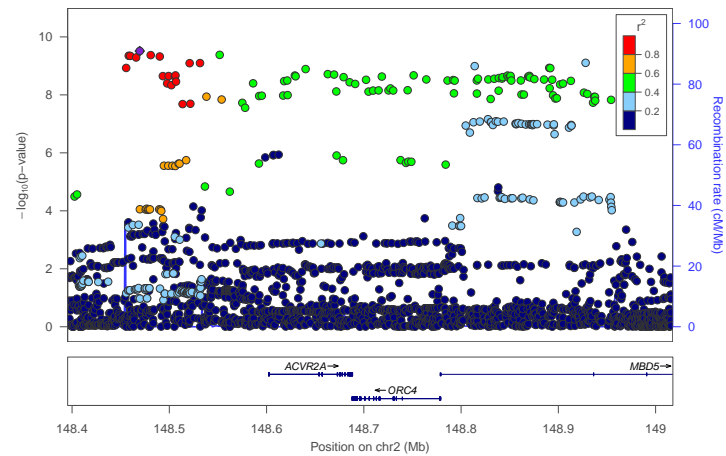

rs1978573

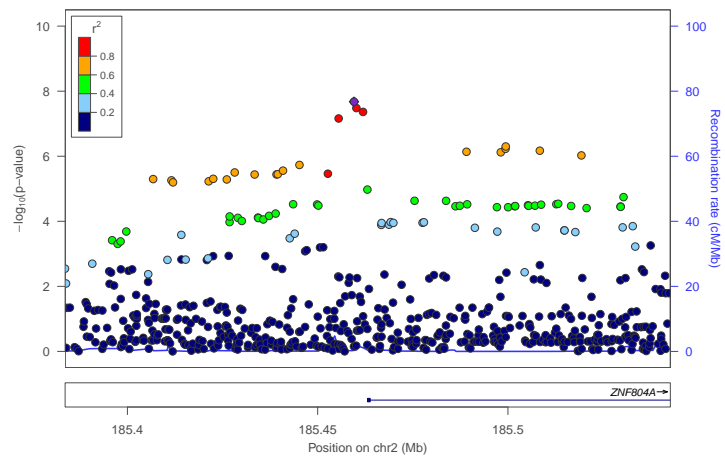

rs219226

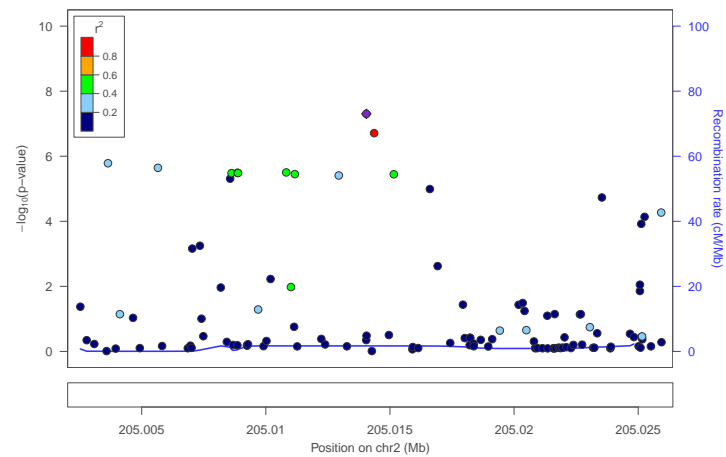

rs10511285

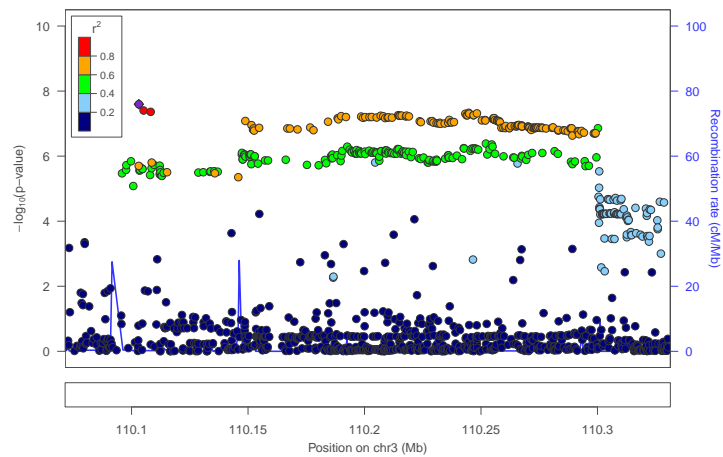

rs62268962

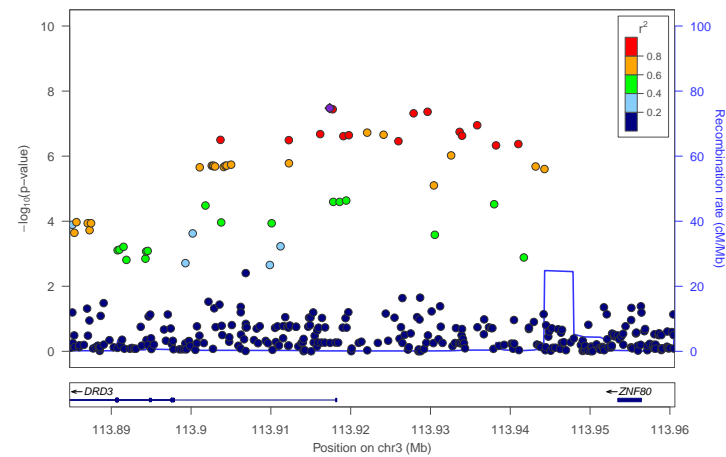

rs2027798

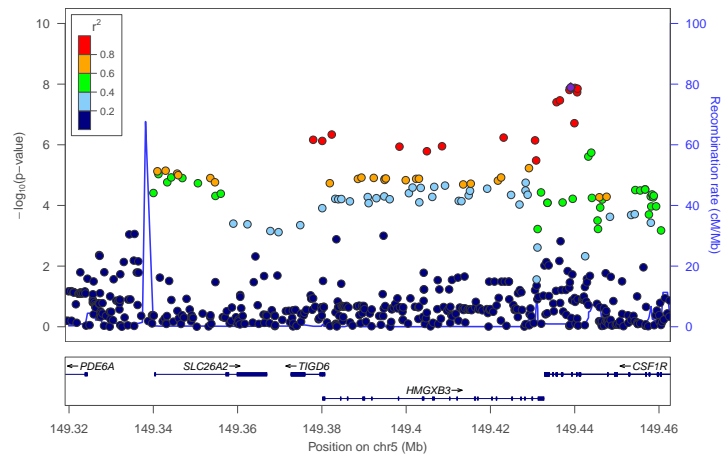

rs4868774

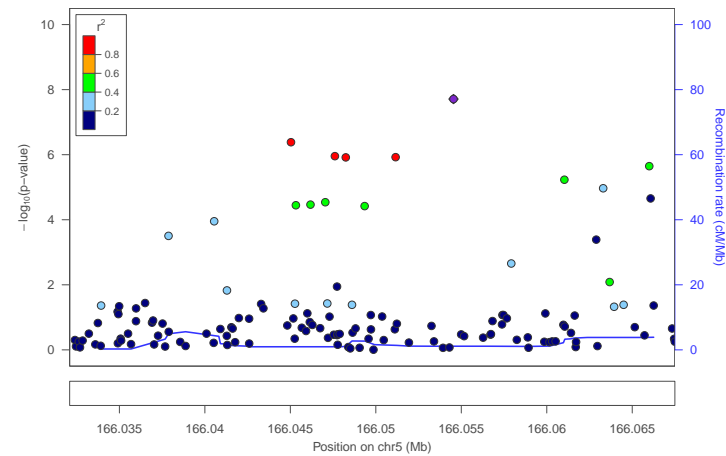

rs8111

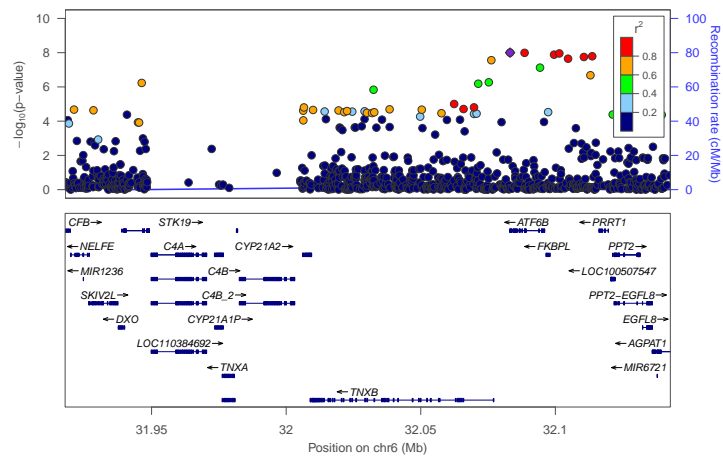

rs11767715

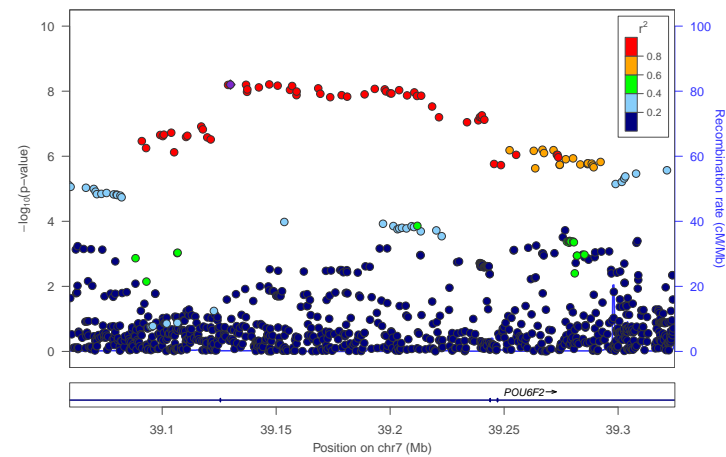

rs34548930

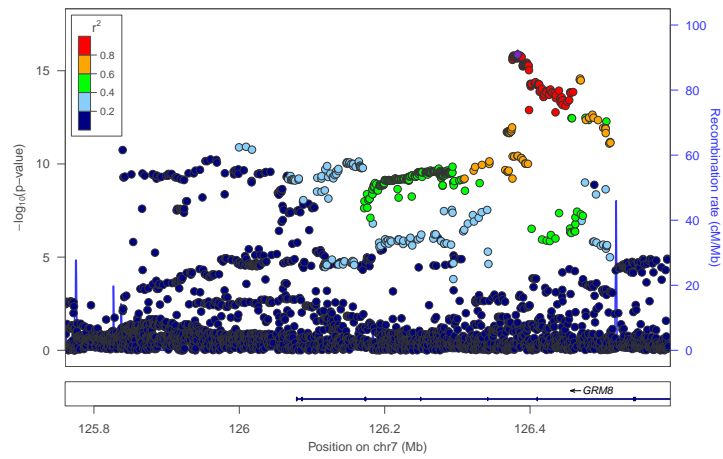

rs10117184

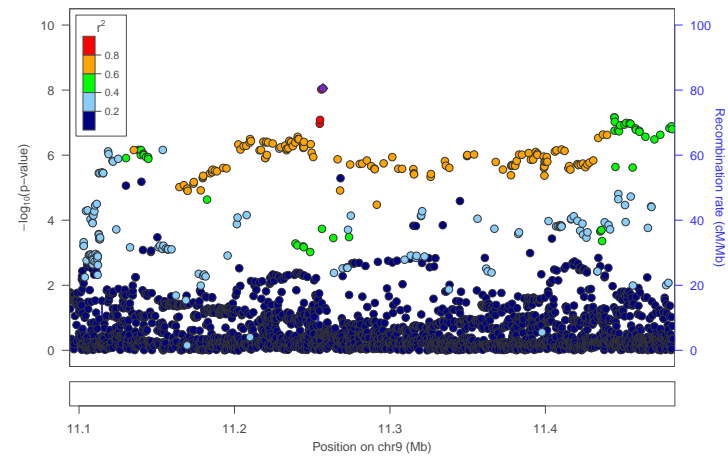

rs1231375

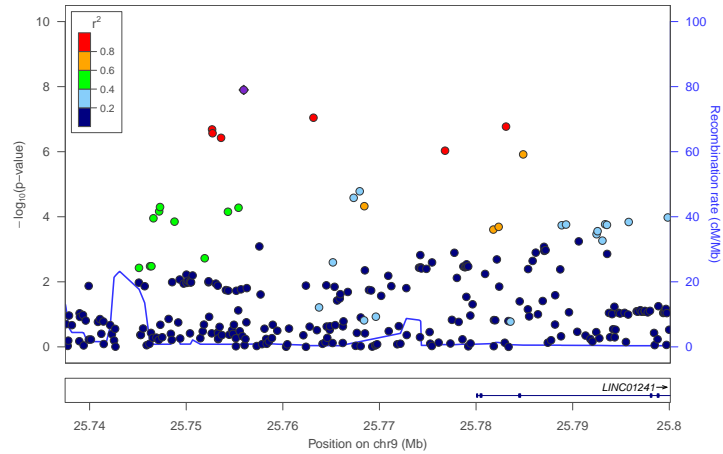

rs17532098

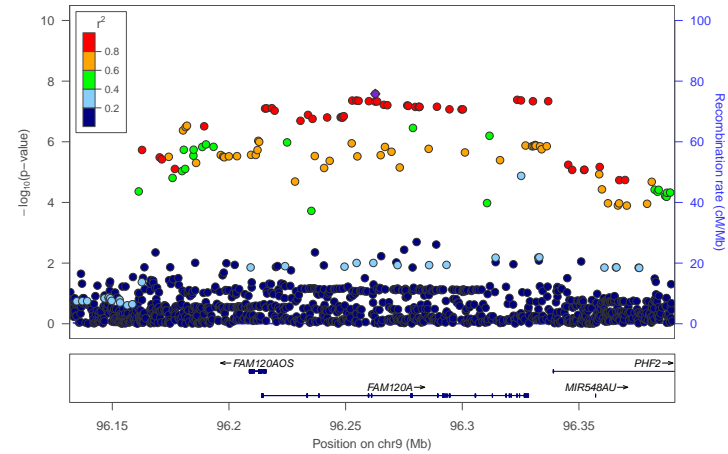

rs145965565

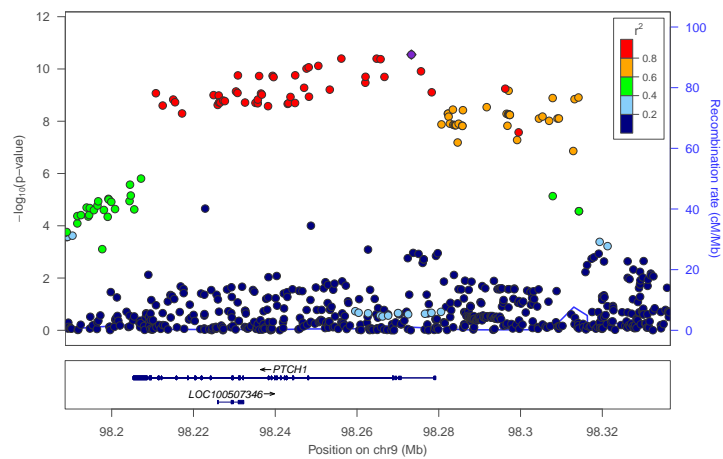

rs73480560

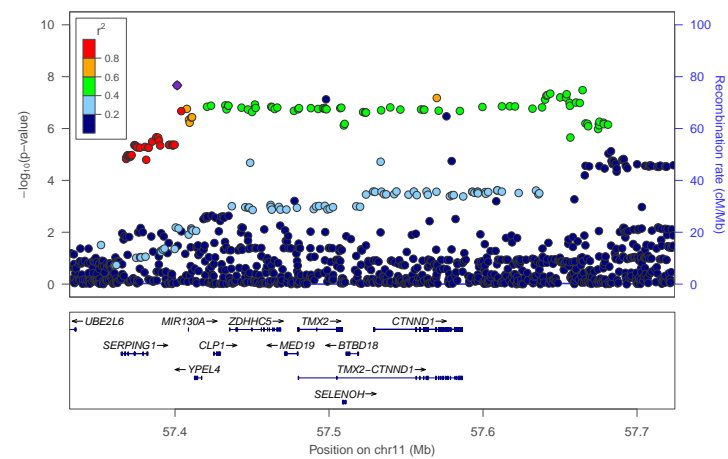

rs10891564

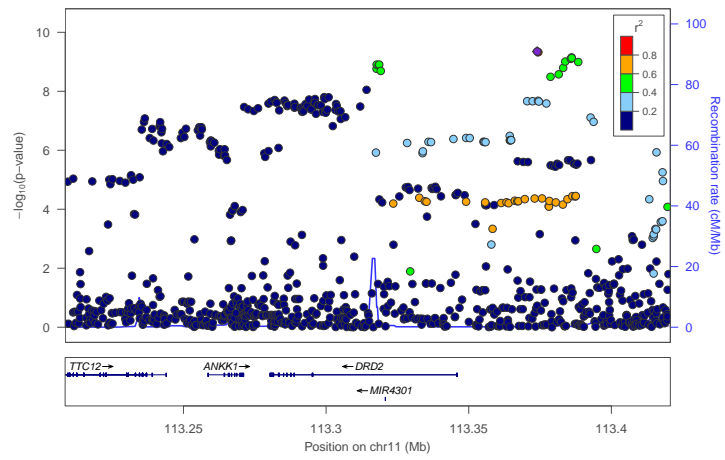

rs10850379

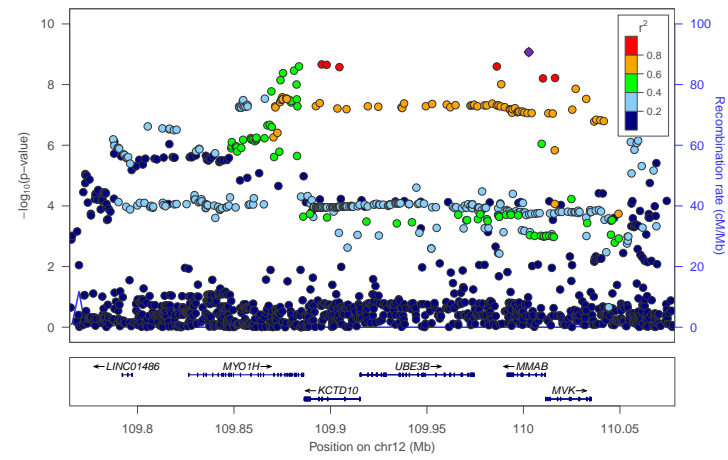

rs2102923

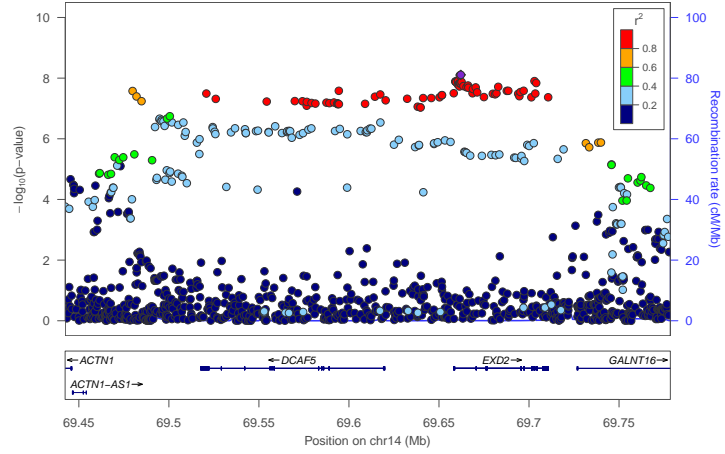

rs4702

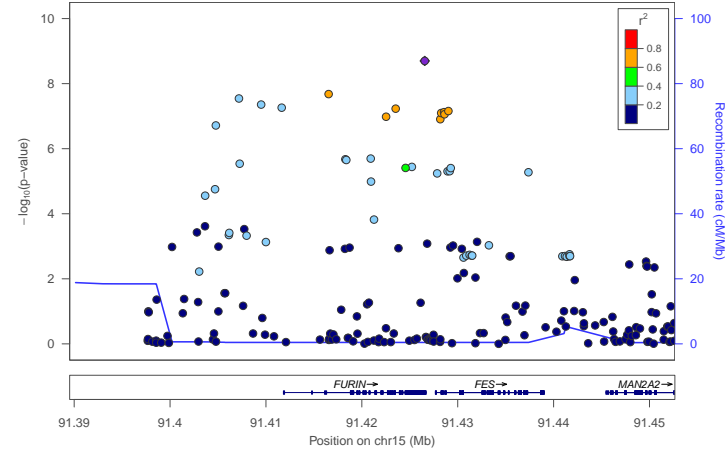

rs12933611

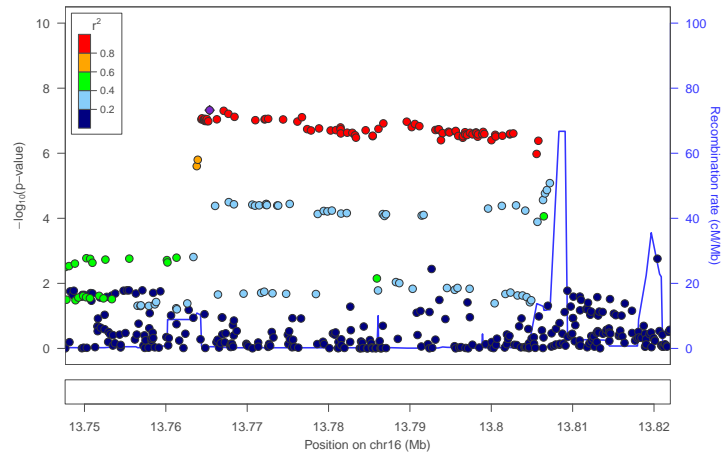

rs62035176

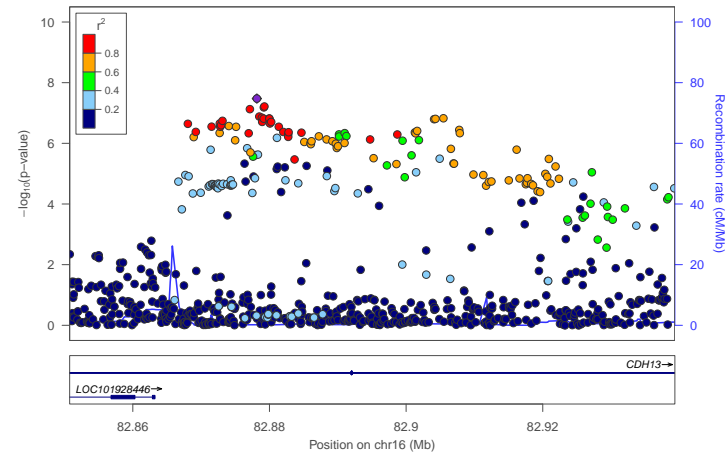



rs4791774

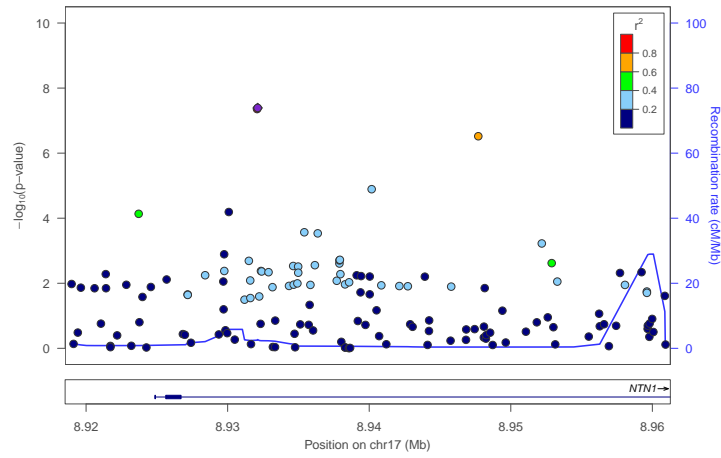

rs55657917

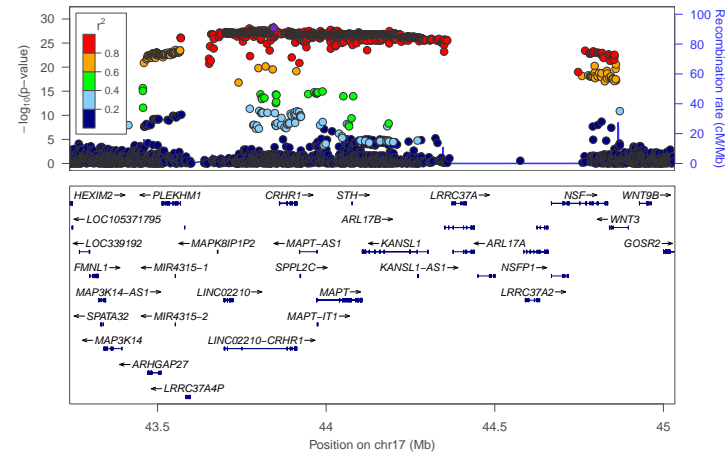

rs11663050

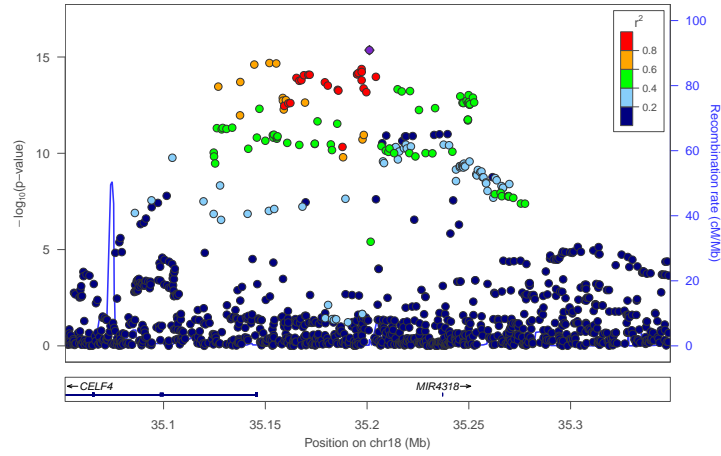

rs545853

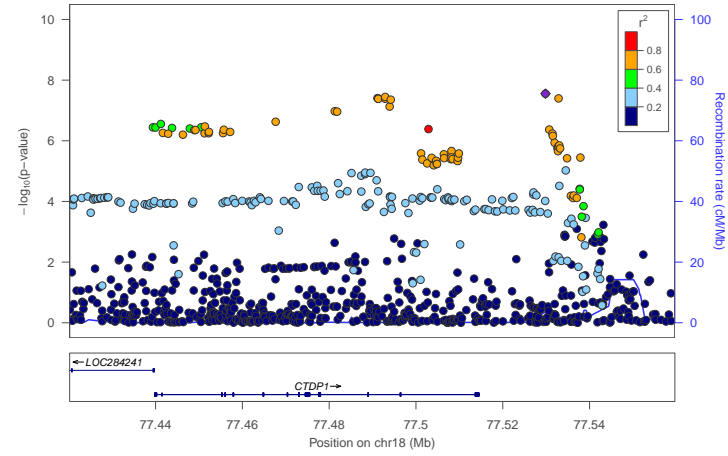

rs1389993

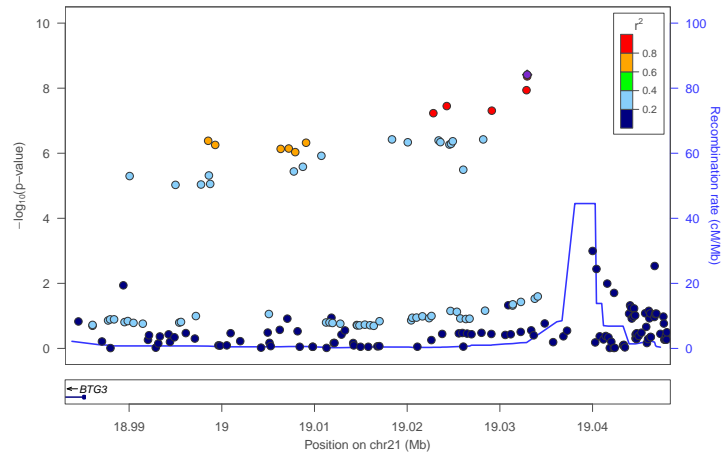

**Supplementary Figure 14. Regional plots of GWA analyses of item HURT.**

The  $y$ -axis represents the negative logarithm (base 10) of the SNP  $P$  value and the  $x$ -axis the position on the chromosome, with the name and location of genes in the UCSC Genome Browser in the bottom panel. The SNP with the lowest  $P$  value in the region is marked by a purple diamond. The colors of the other SNPs indicate the  $r^2$  of these SNPs with the lead SNP, with grey color indicating SNPs below the user-defined  $r^2$ . Plots are generated with LocusZoom. See **Supplementary Data 2** for an overview of all lead SNPs for which a regional plot is presented above.

rs1983614

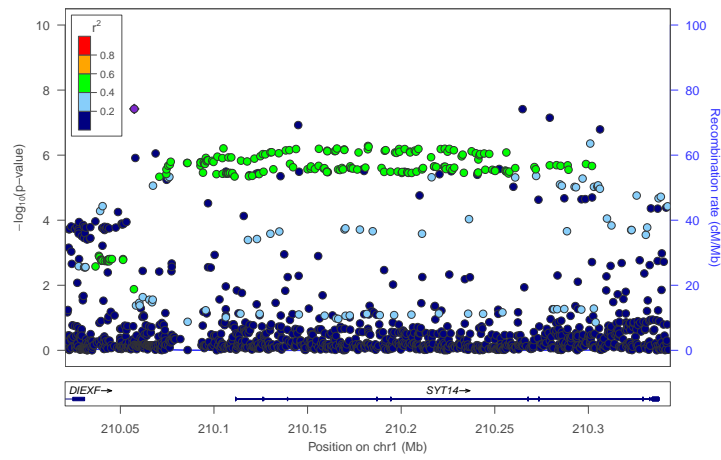

rs9811585

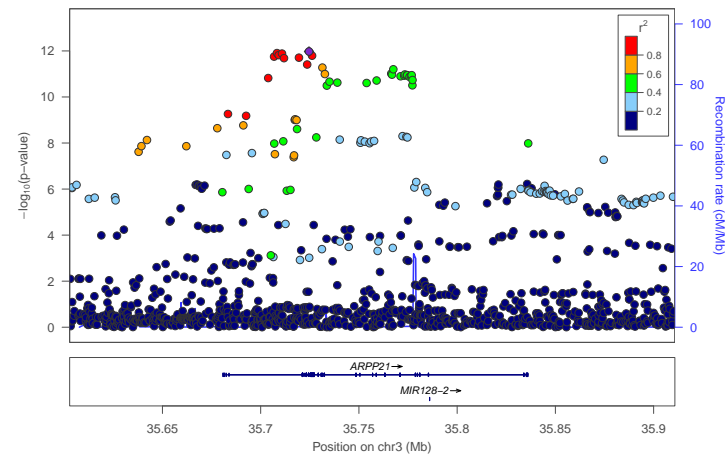

rs793545

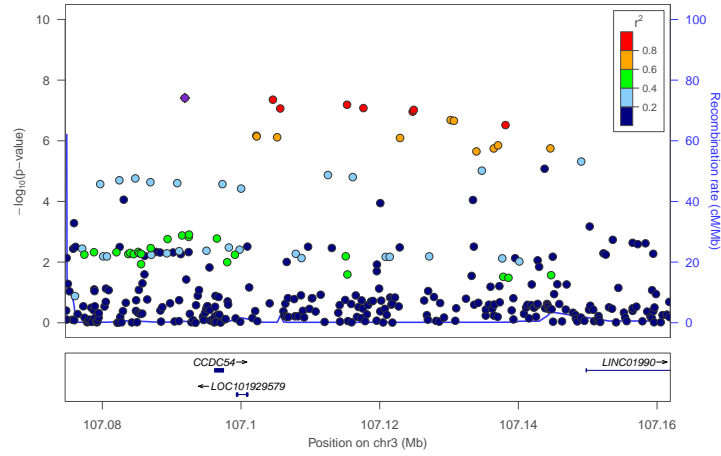

rs6439649

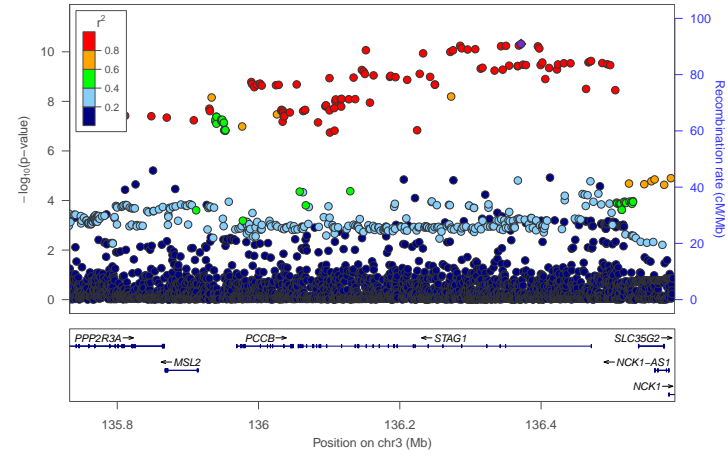

rs362307

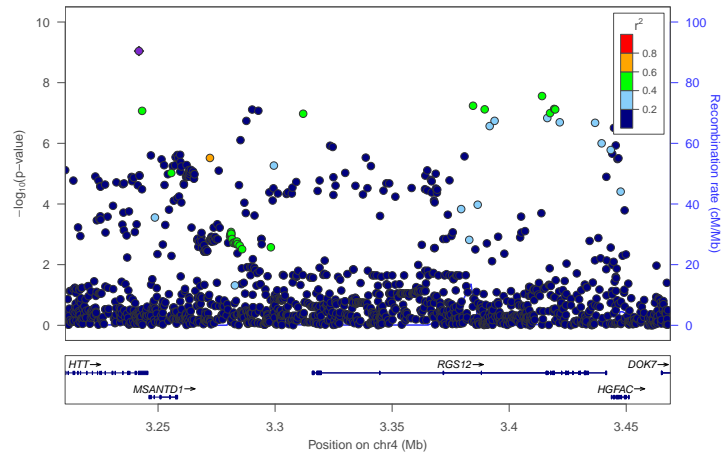

rs35267052

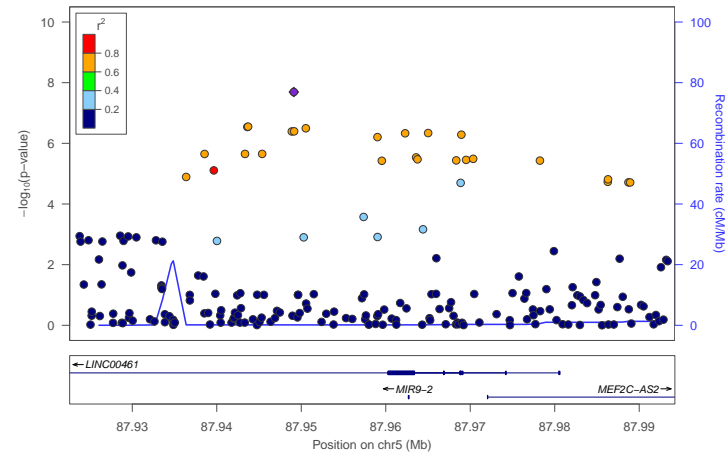

rs406204

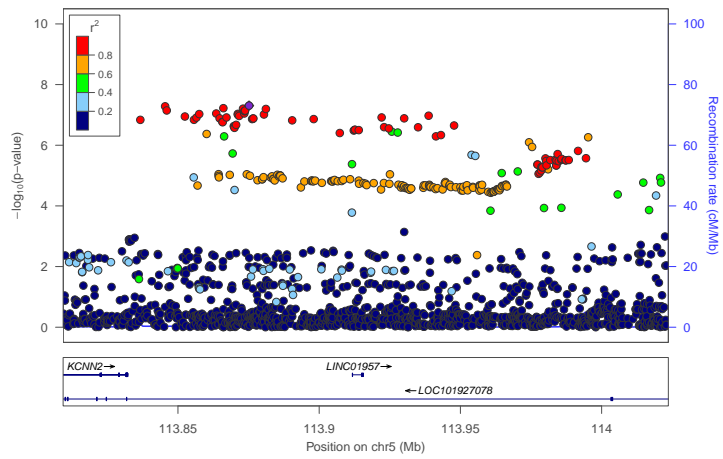

rs3777095

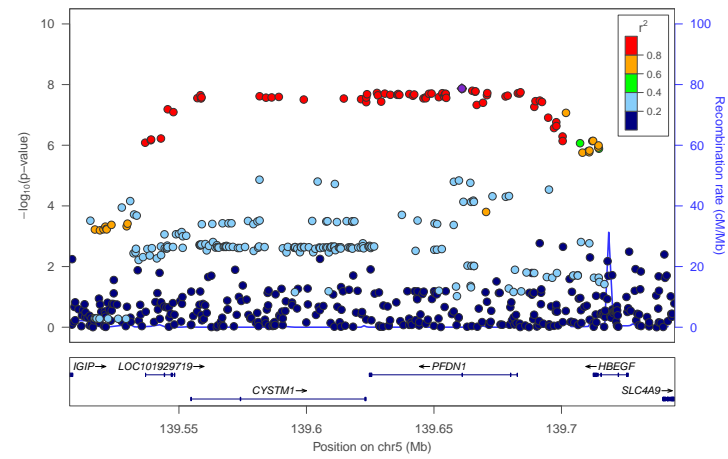

rs3999543

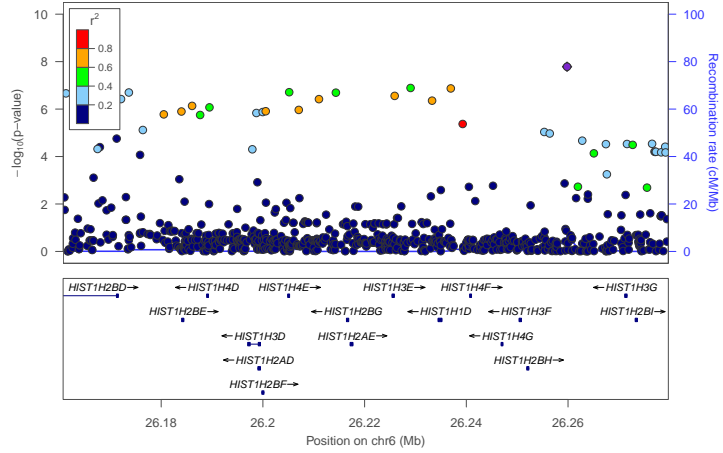

rs727903

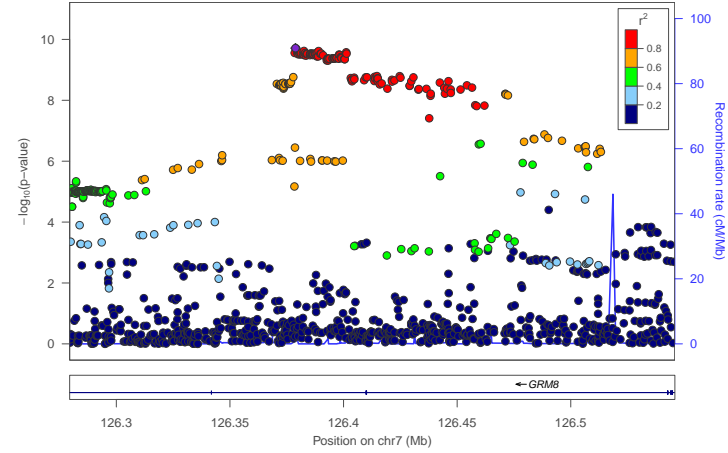

rs72765272

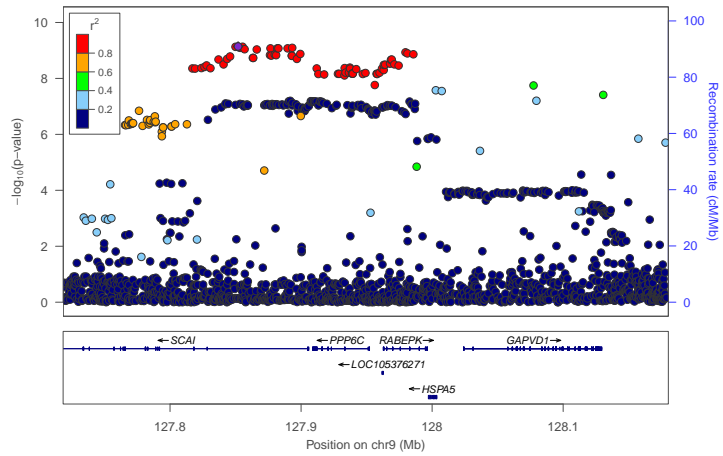

rs34588274

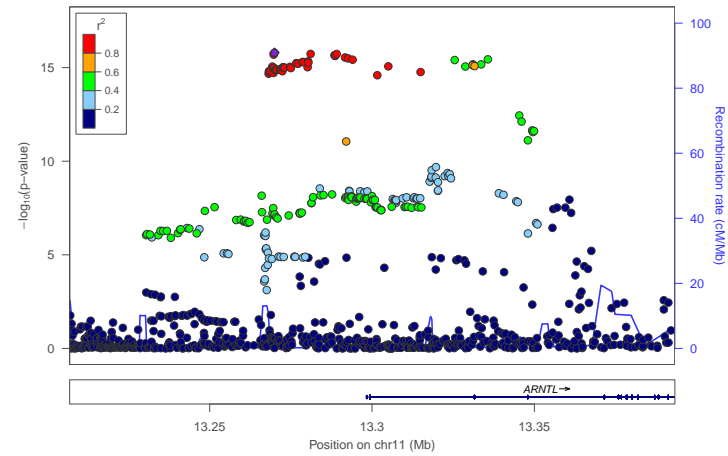

rs10750866

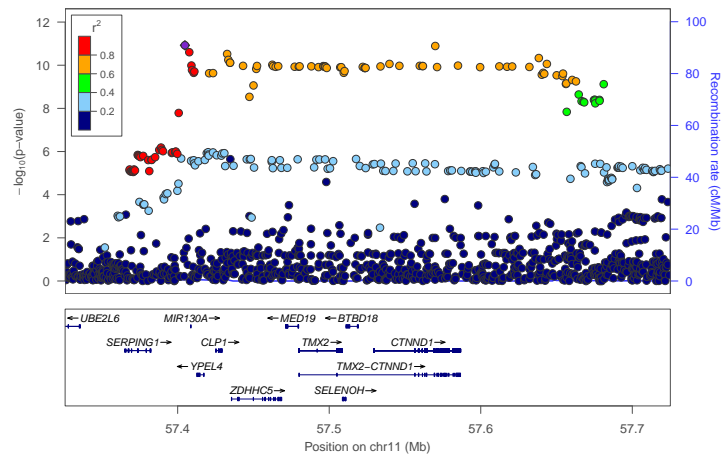

rs2734837

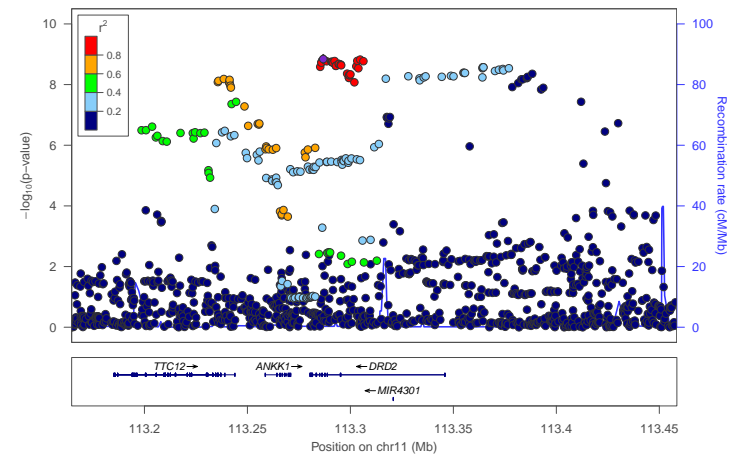

rs2160515

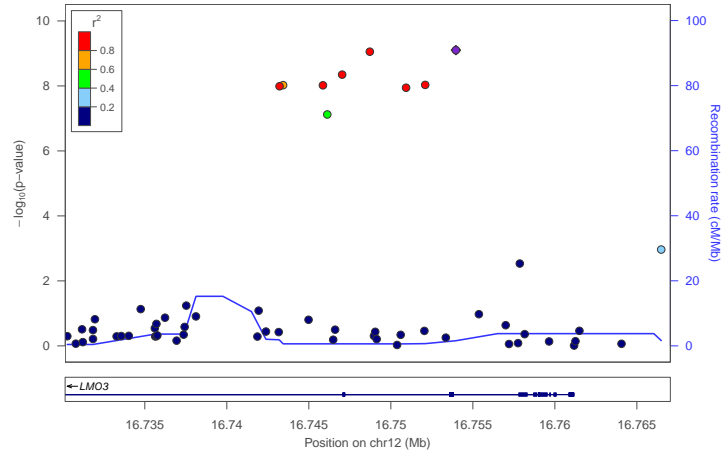

rs3742021

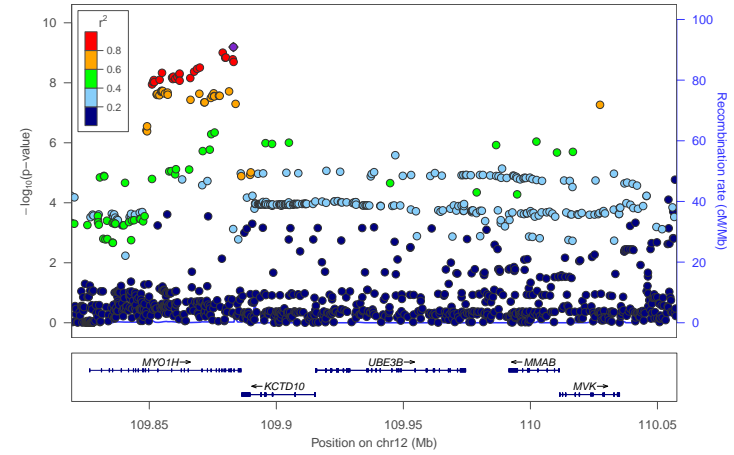

rs7987467

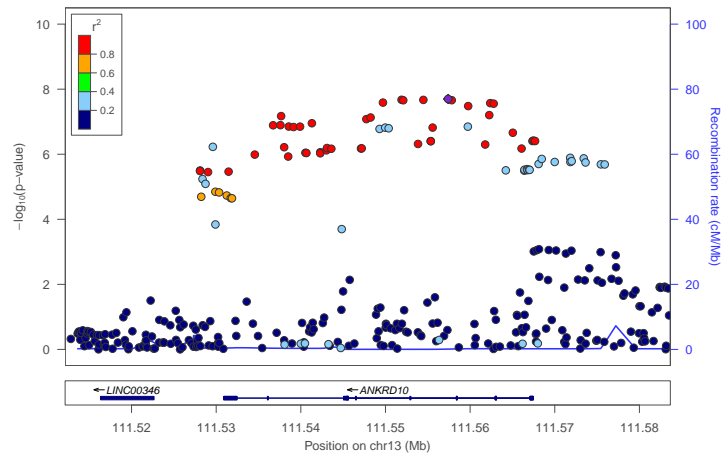

rs2191130

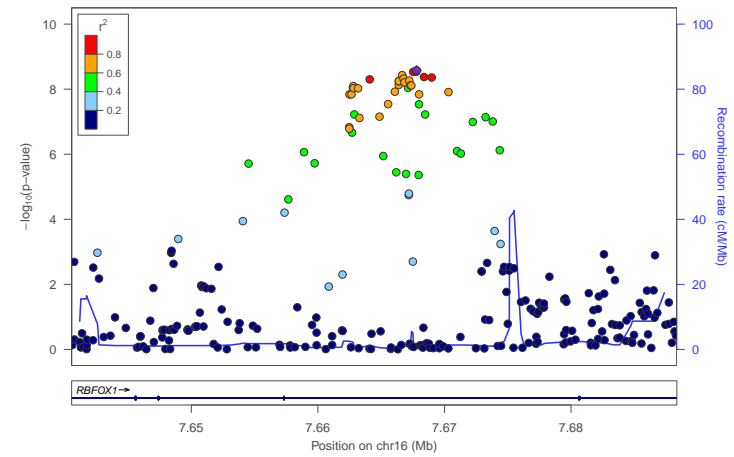

rs75022332

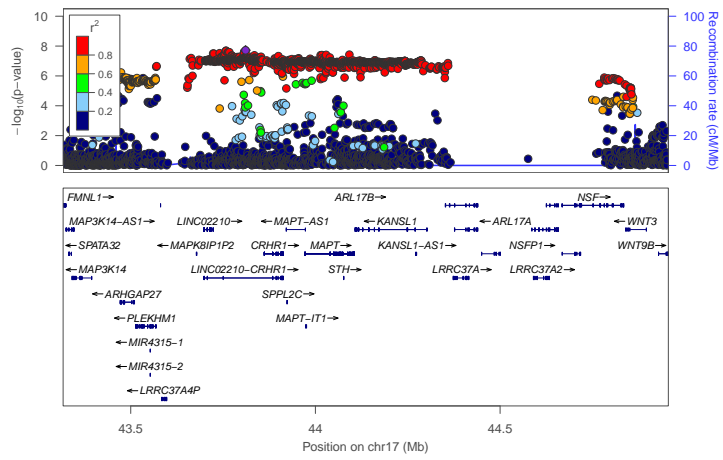

rs35327499

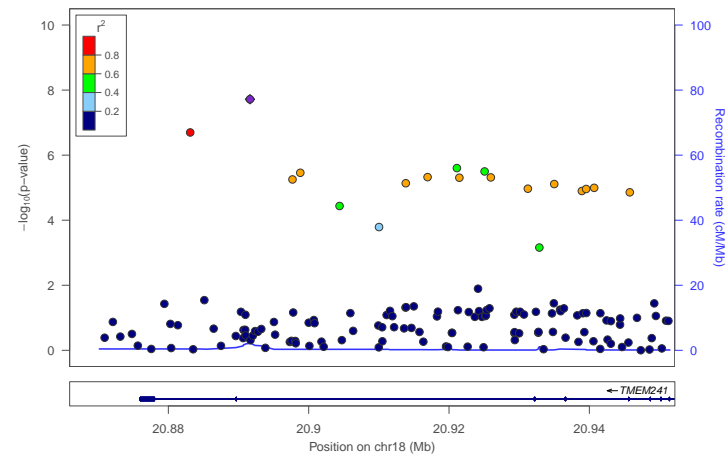

rs55731231

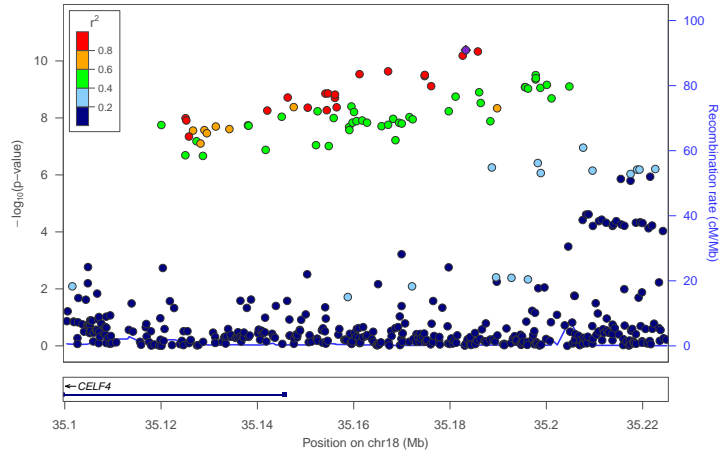

**Supplementary Figure 15. Regional plots of GWA analyses of item WORR-EMB.**

The  $y$ -axis represents the negative logarithm (base 10) of the SNP  $P$  value and the  $x$ -axis the position on the chromosome, with the name and location of genes in the UCSC Genome Browser in the bottom panel. The SNP with the lowest  $P$  value in the region is marked by a purple diamond. The colors of the other SNPs indicate the  $r^2$  of these SNPs with the lead SNP, with grey color indicating SNPs below the user-defined  $r^2$ . Plots are generated with LocusZoom. See **Supplementary Data 2** for an overview of all lead SNPs for which a regional plot is presented above.

rs681875

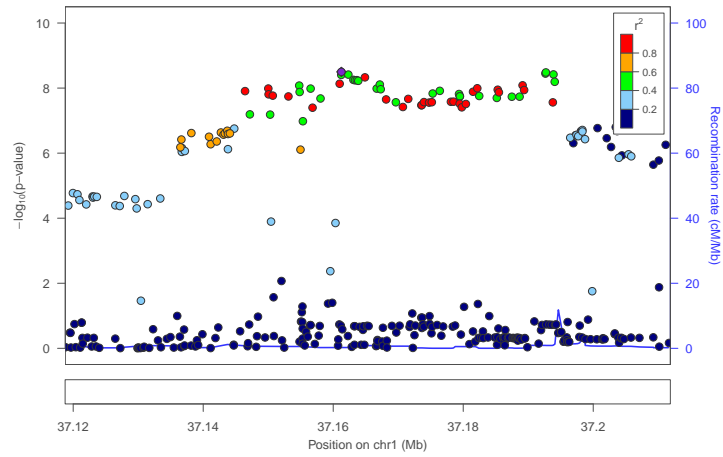

rs34657012

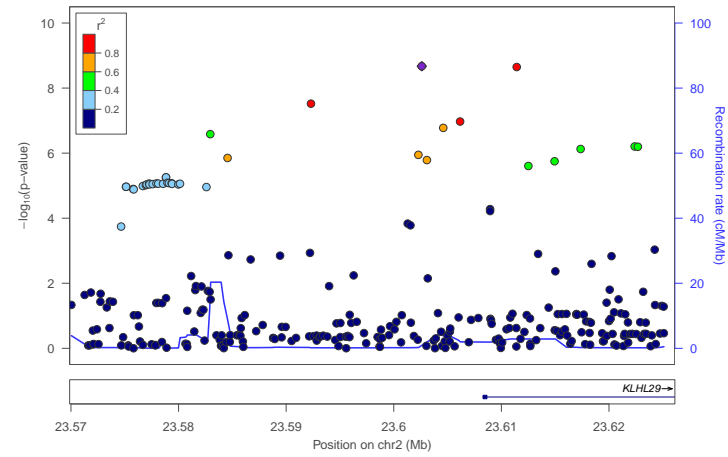

rs56343114

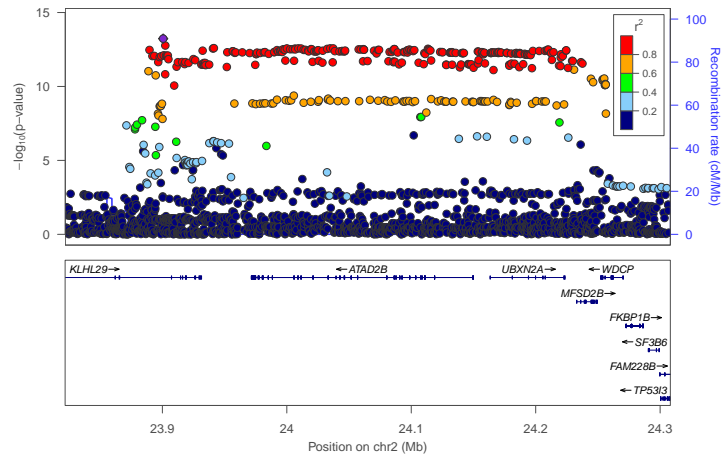

rs780024

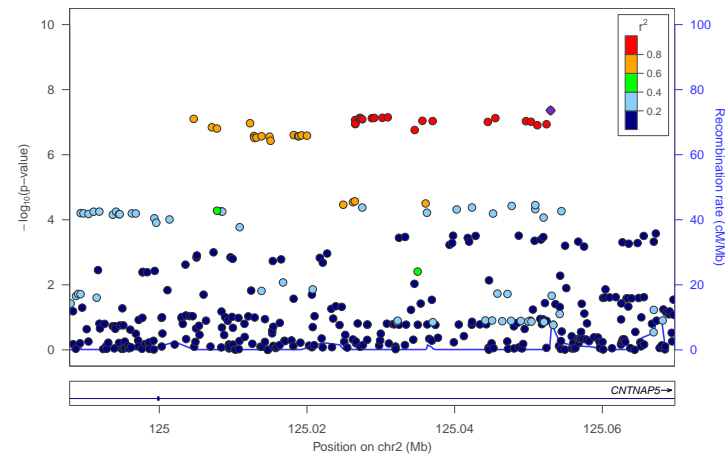

rs200988

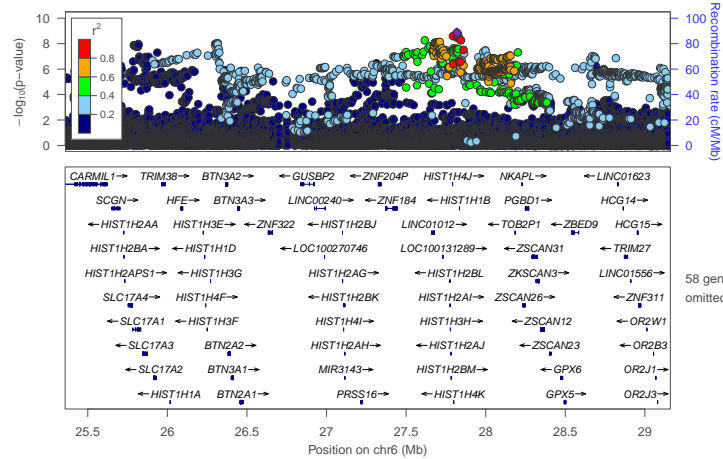

rs6986

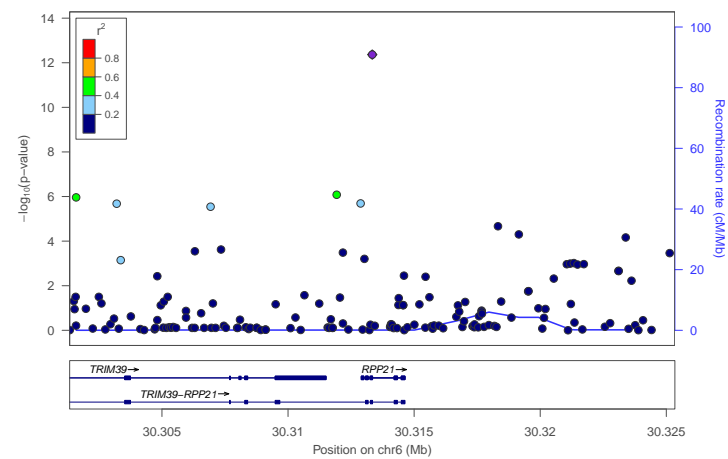



rs12528131

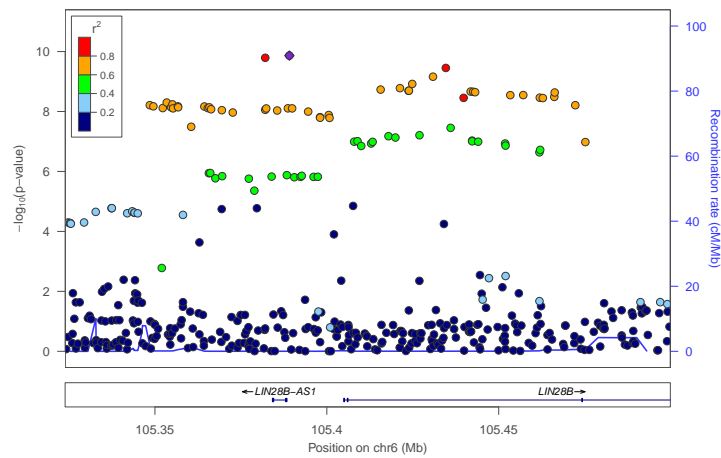

rs10119773

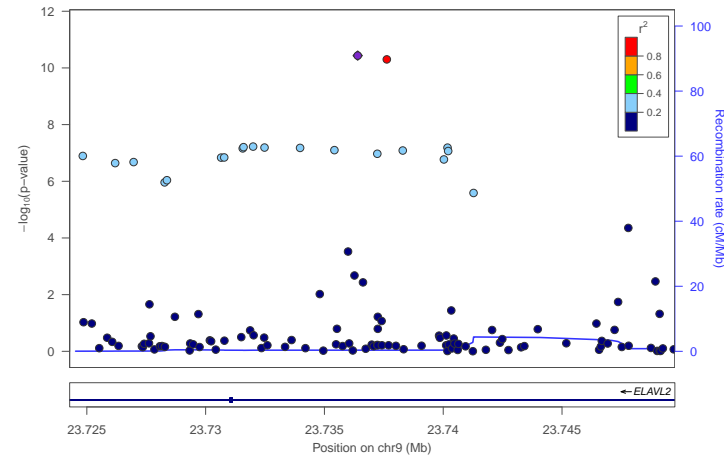

rs35623509

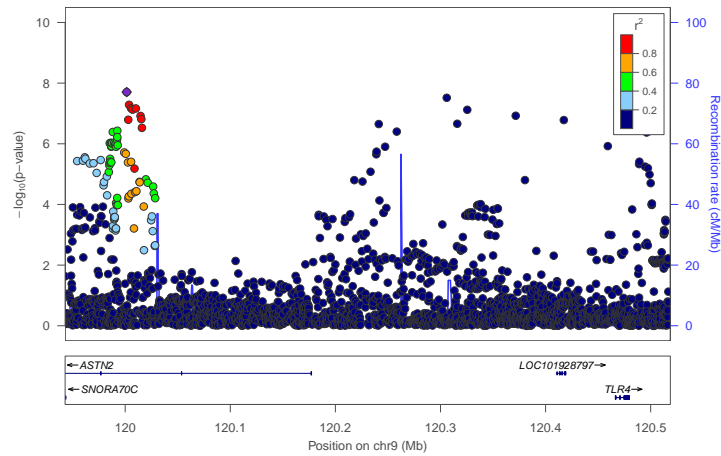

rs55769038

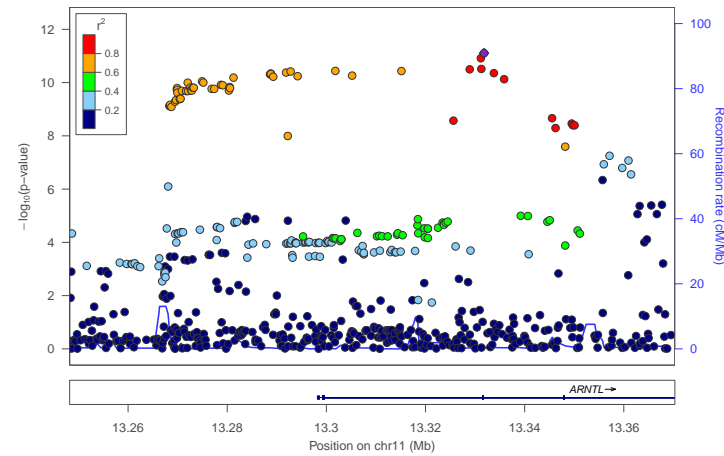

rs12420205

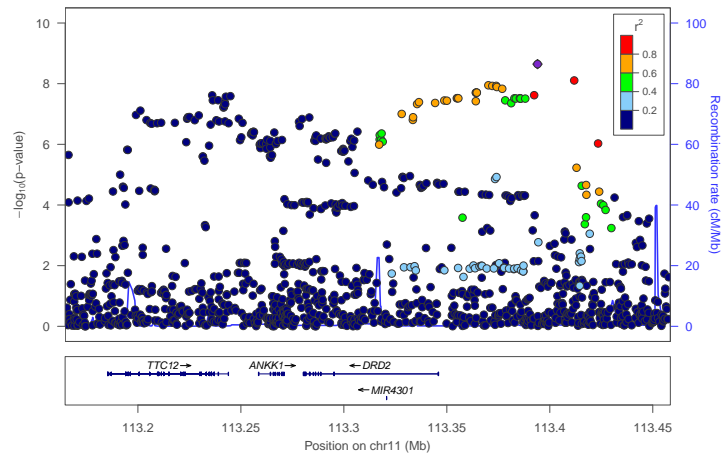

rs77804065

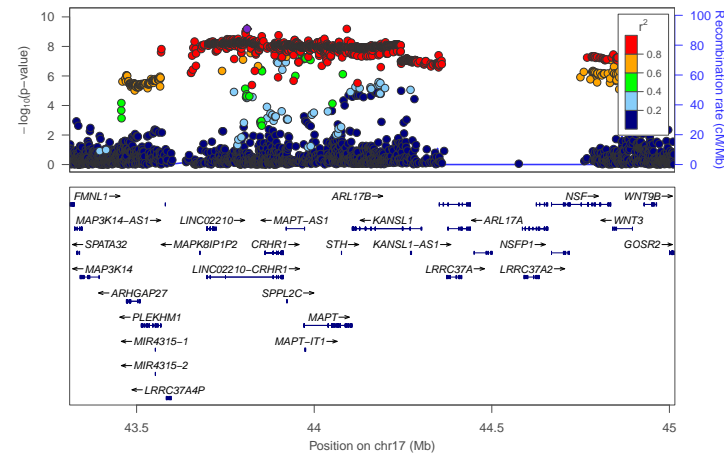

rs2109648

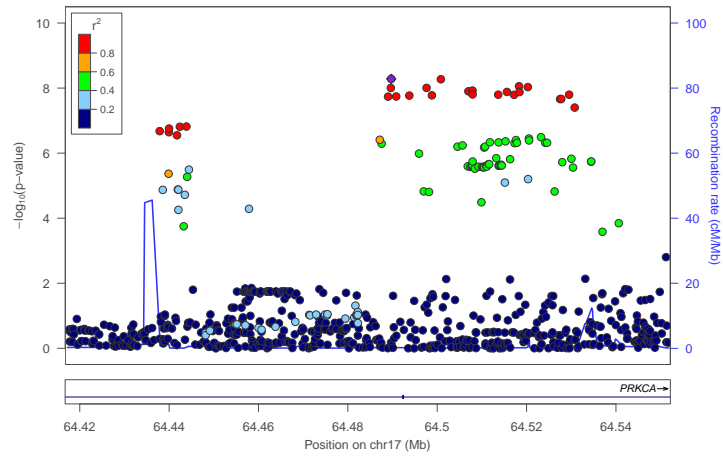

rs1557339

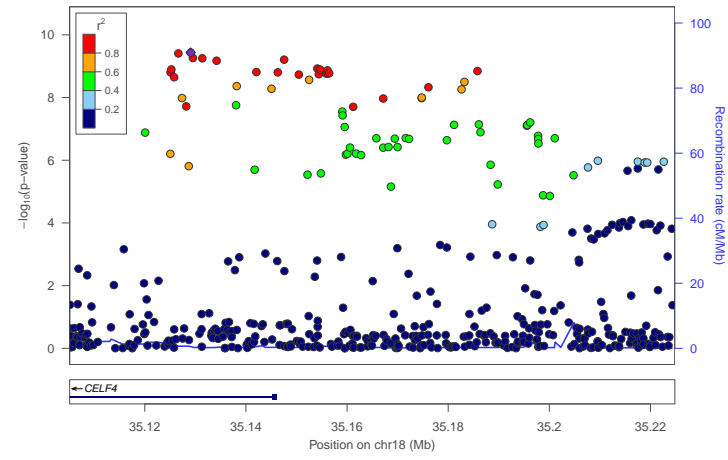

**Supplementary Figure 16. Regional plots of GWA analyses of item GUILT.**

The  $y$ -axis represents the negative logarithm (base 10) of the SNP  $P$  value and the  $x$ -axis the position on the chromosome, with the name and location of genes in the UCSC Genome Browser in the bottom panel. The SNP with the lowest  $P$  value in the region is marked by a purple diamond. The colors of the other SNPs indicate the  $r^2$  of these SNPs with the lead SNP, with grey color indicating SNPs below the user-defined  $r^2$ . Plots are generated with LocusZoom. See **Supplementary Data 2** for an overview of all lead SNPs for which a regional plot is presented above.

rs12137398

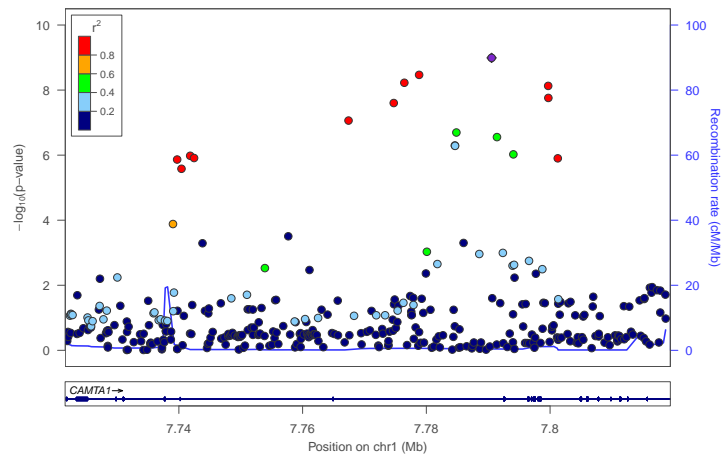

rs11263943

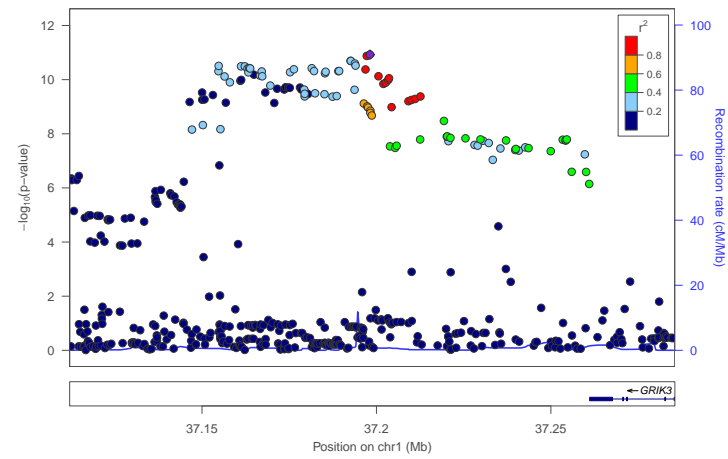

rs12137936

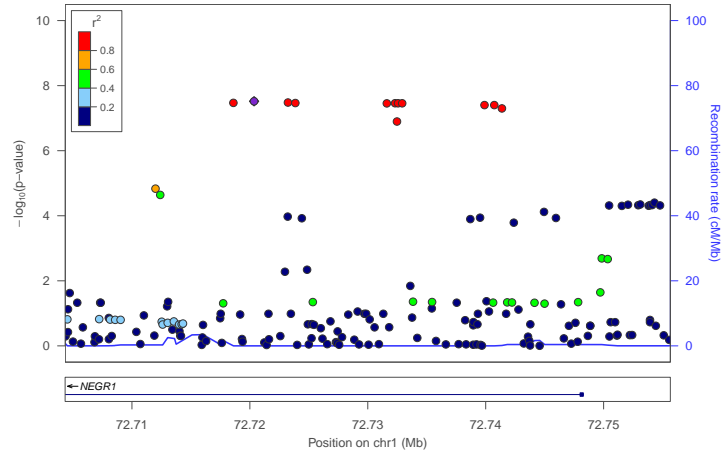

rs17096778

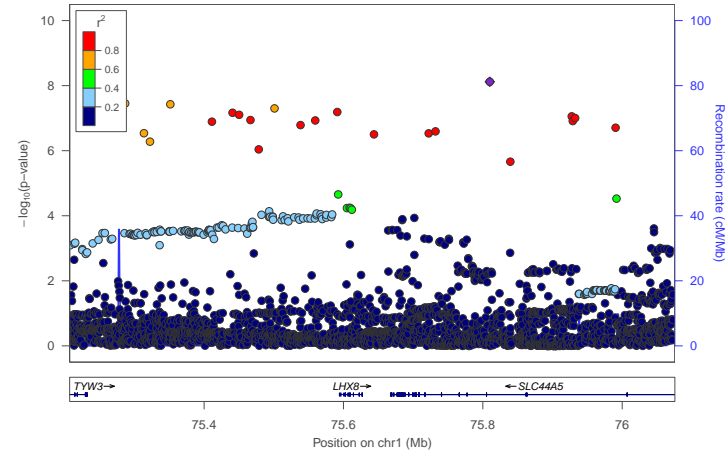

rs11184985

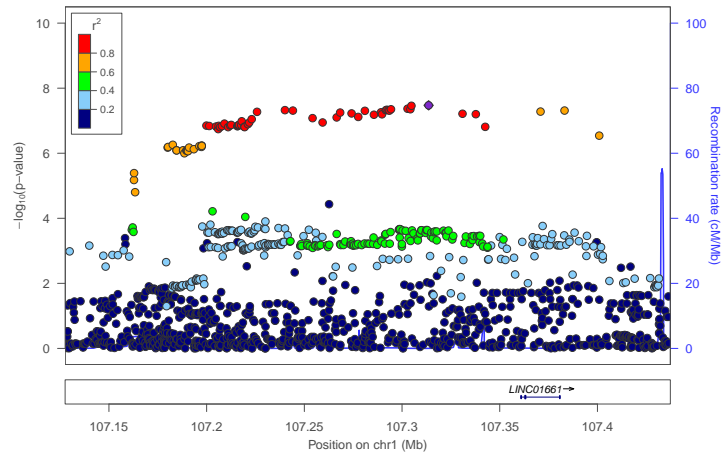

rs12092768

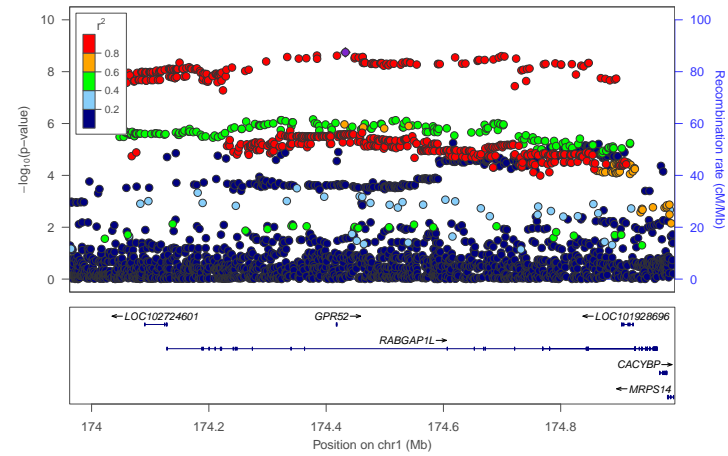

rs2488401

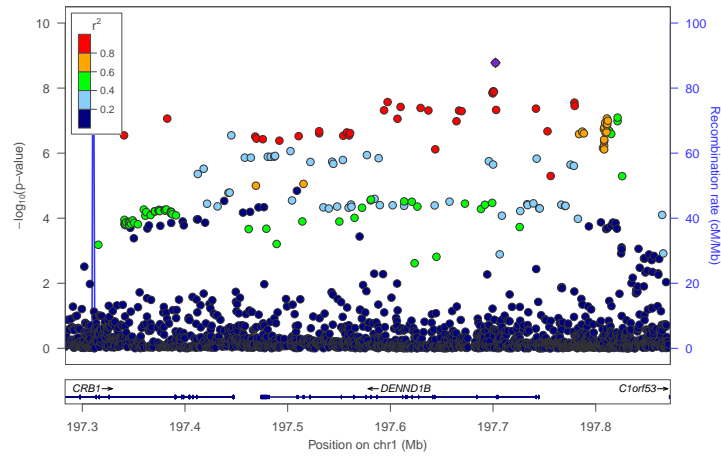

rs17432675

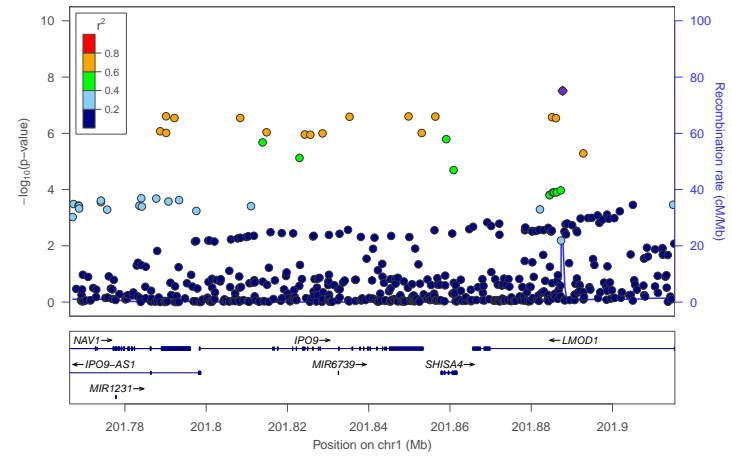

rs4396680

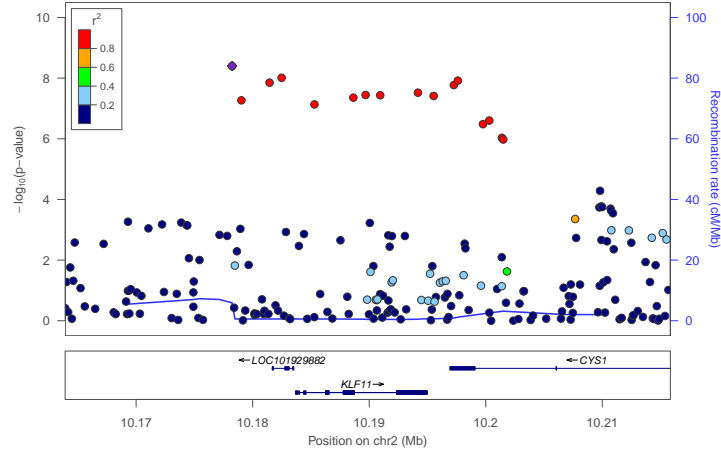

rs2717043

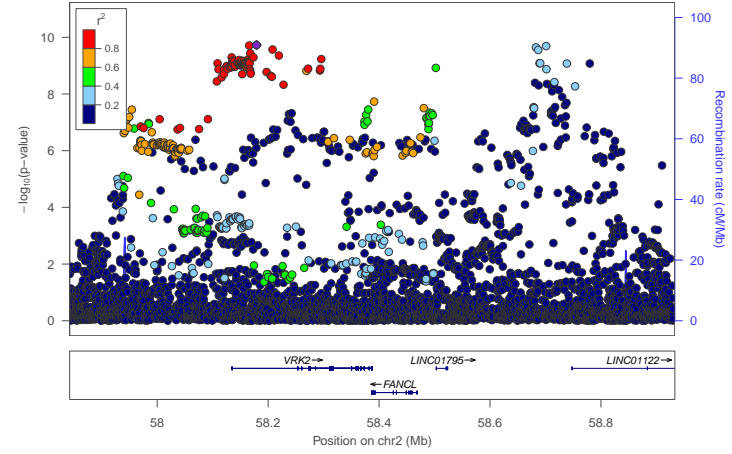

rs17619012

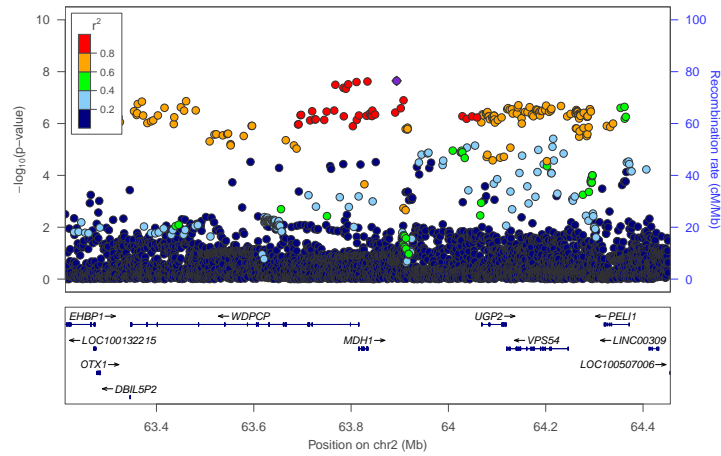

rs998884

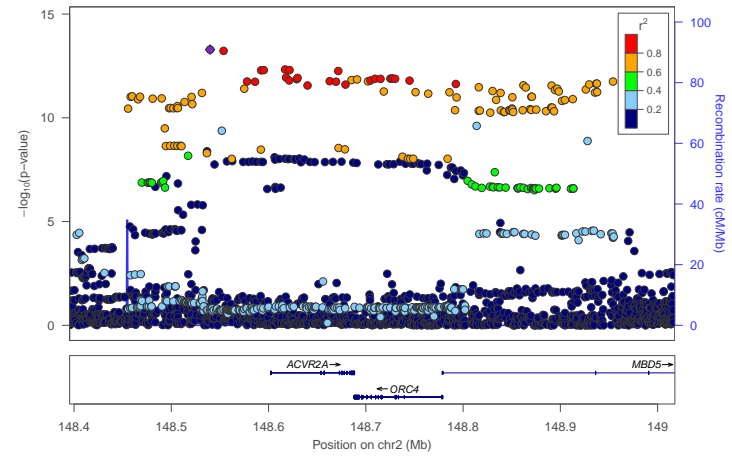

rs59491086

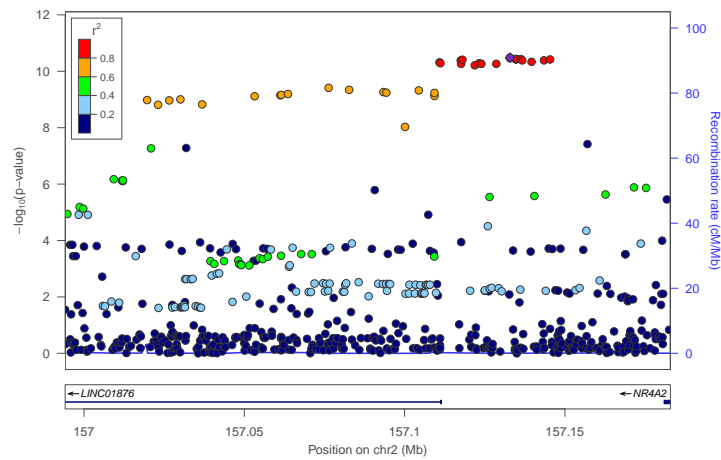

rs10497655

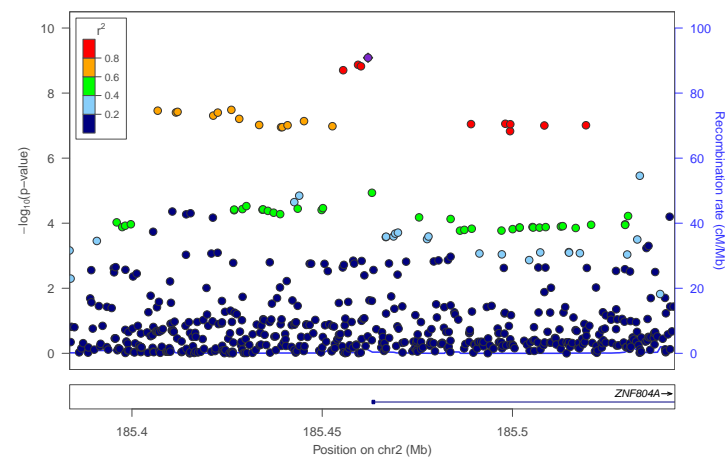

rs988867

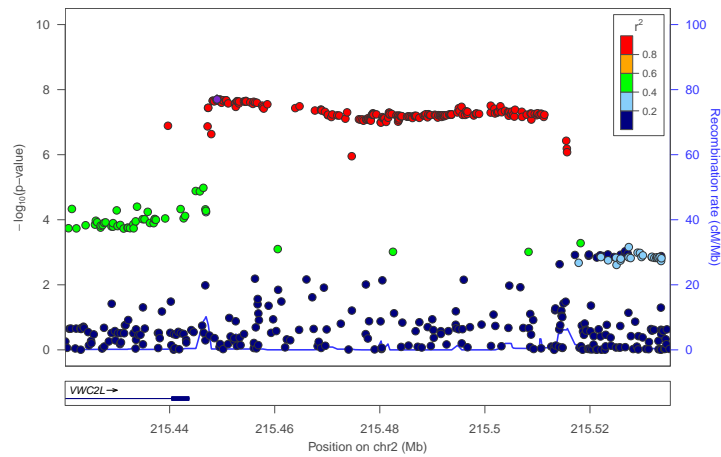

rs6737187

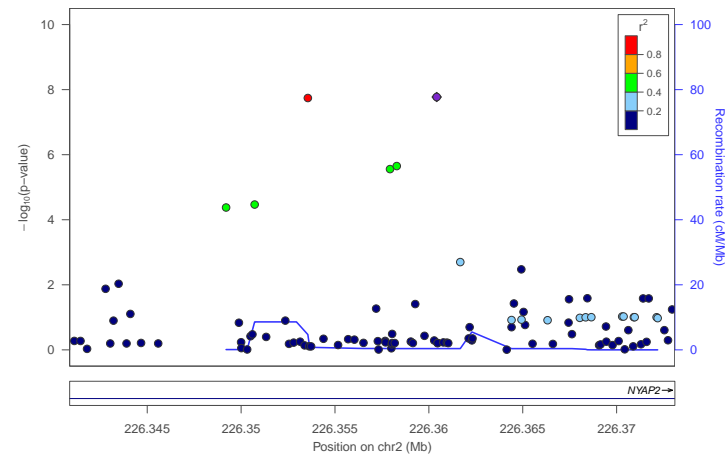

rs6773869

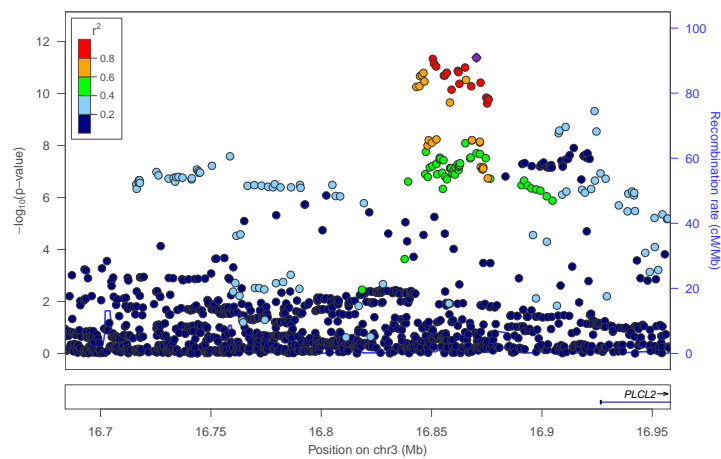

rs1542212

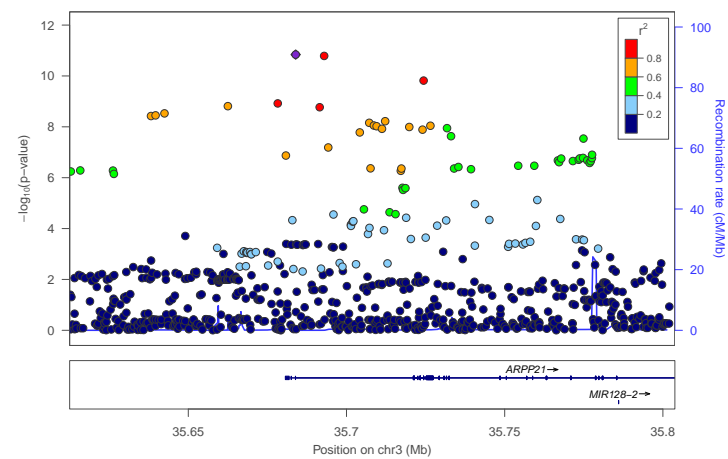

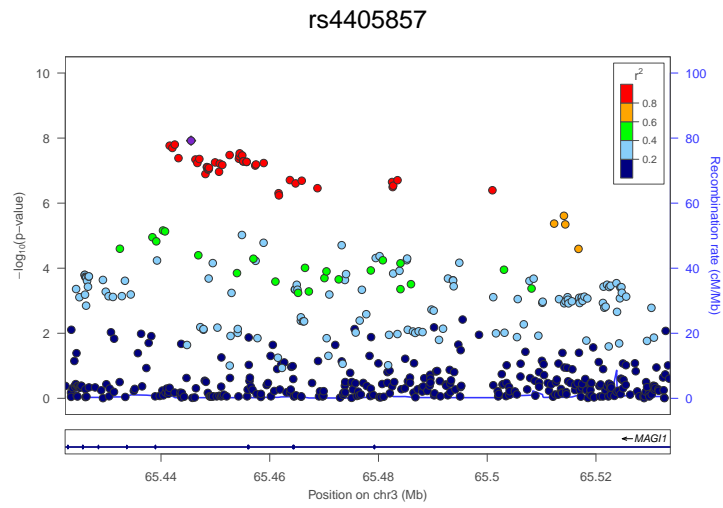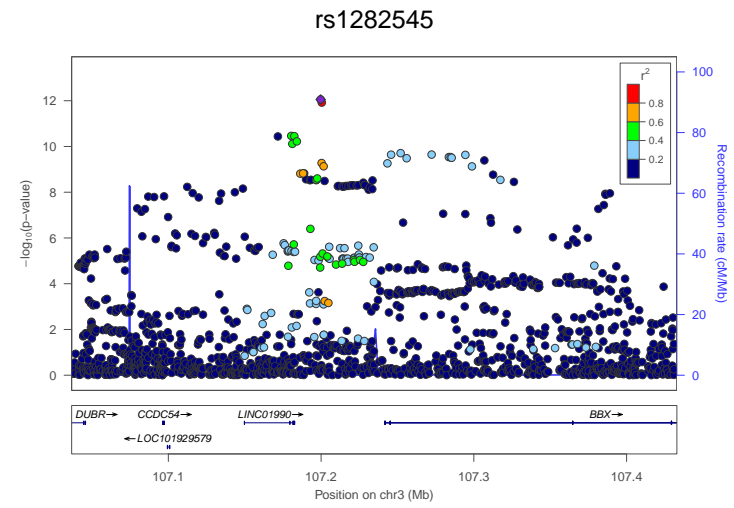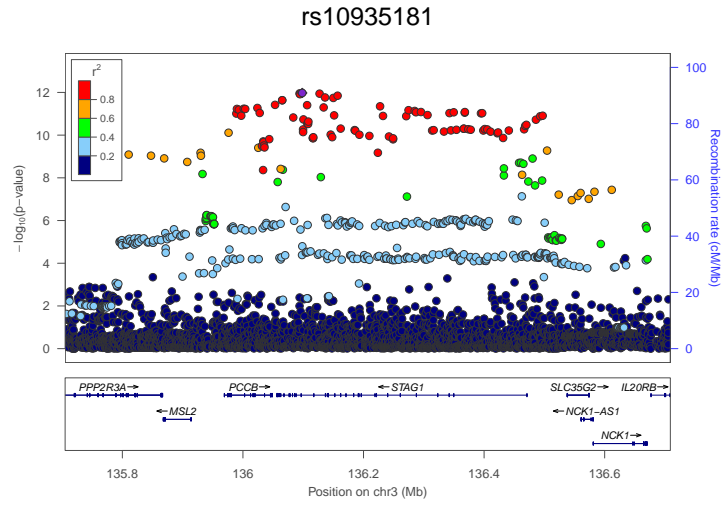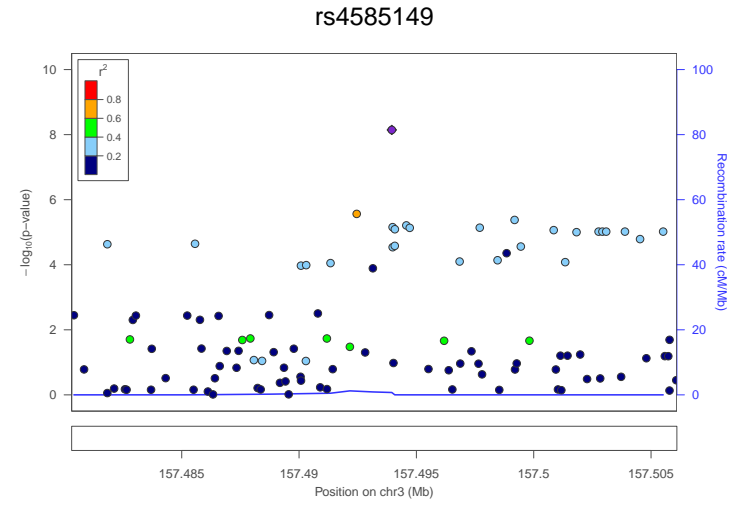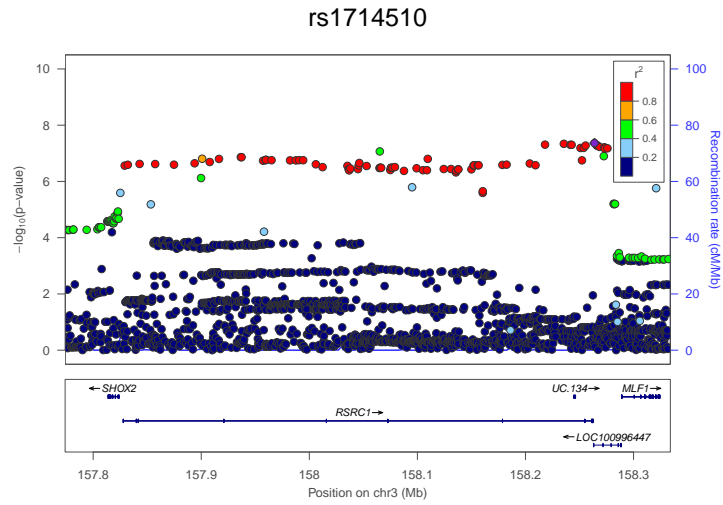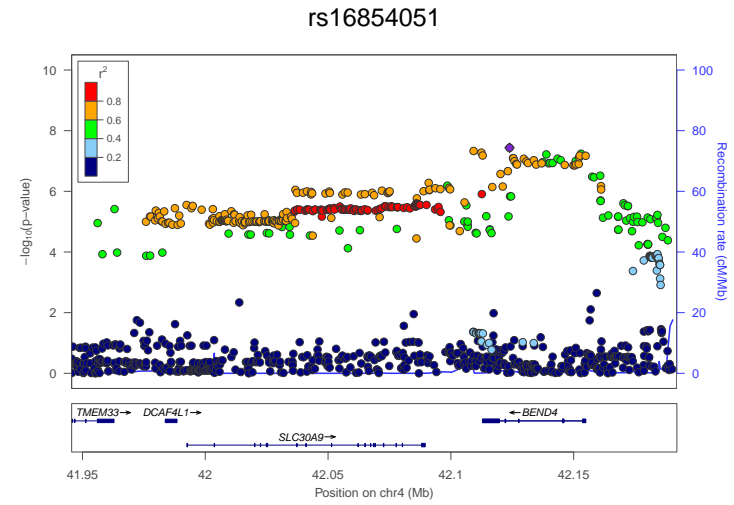

rs10005233

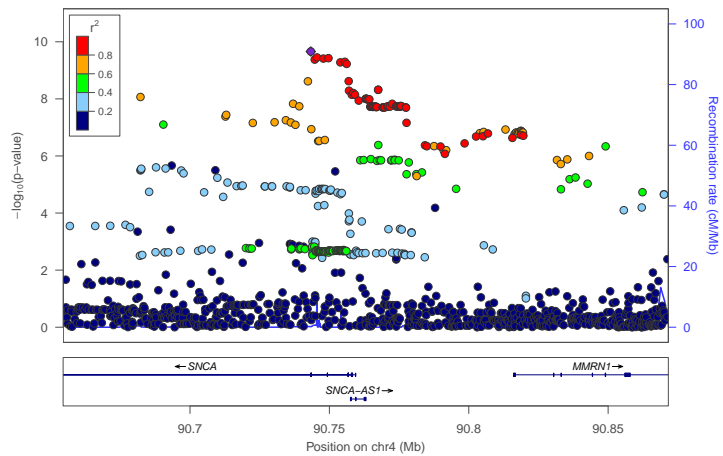

rs4530683

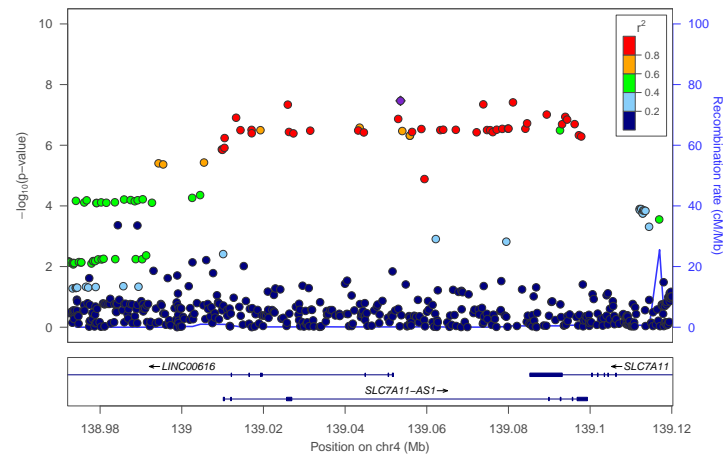

rs10054419

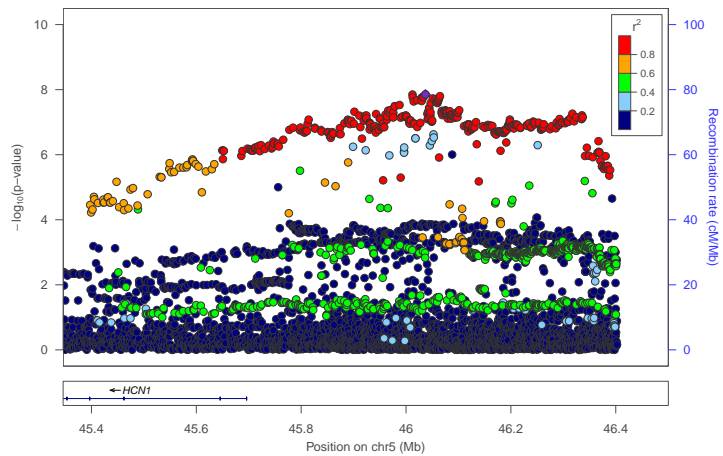

rs1422192

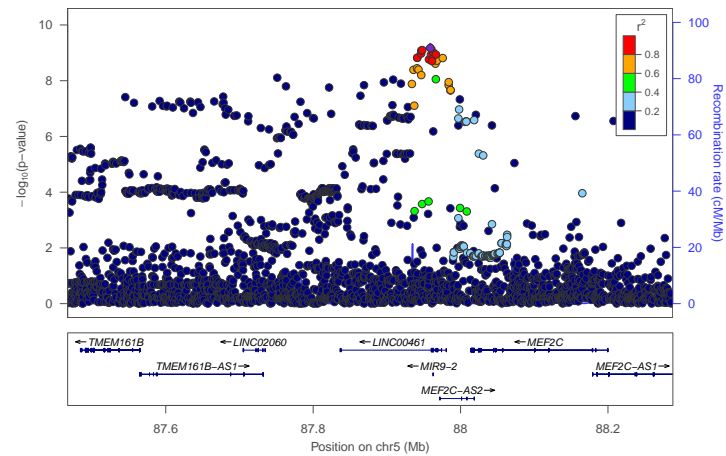

rs11948261

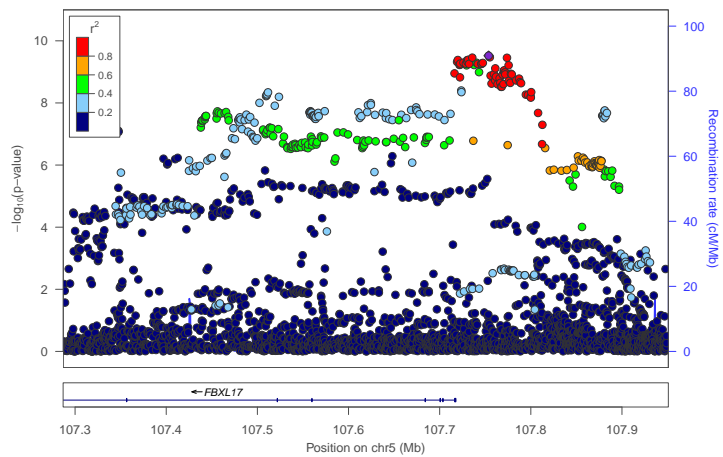

rs58007470

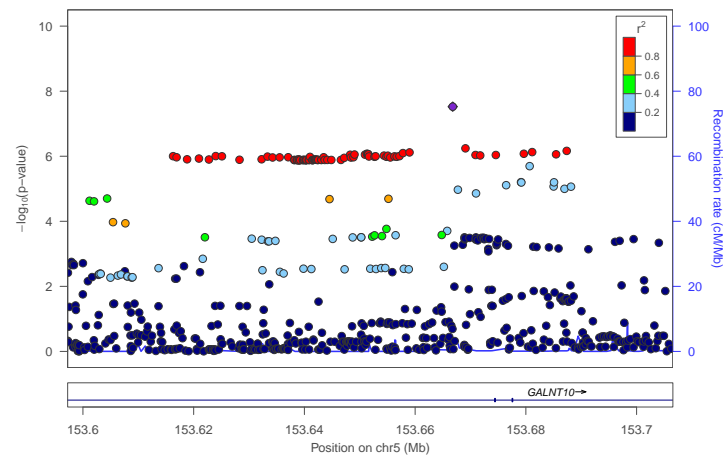



rs10476484

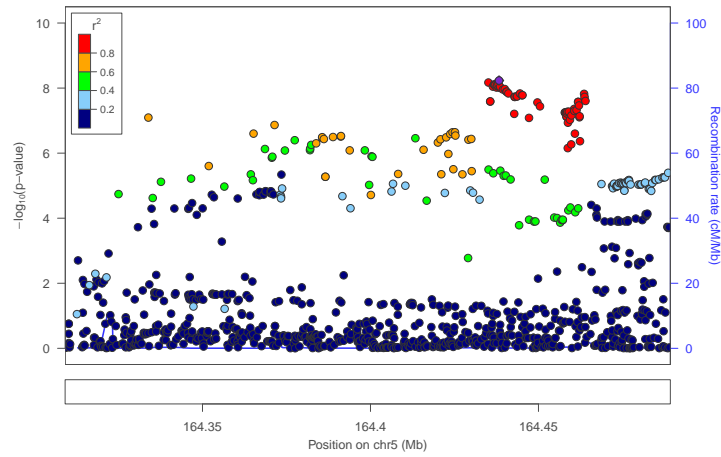

rs80116564

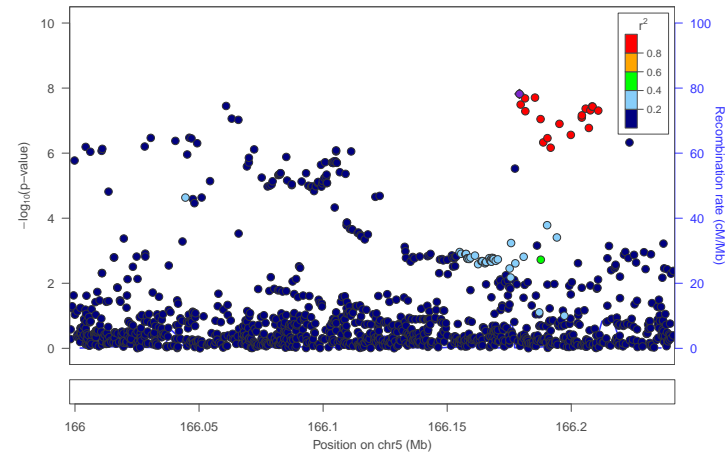

rs10456089

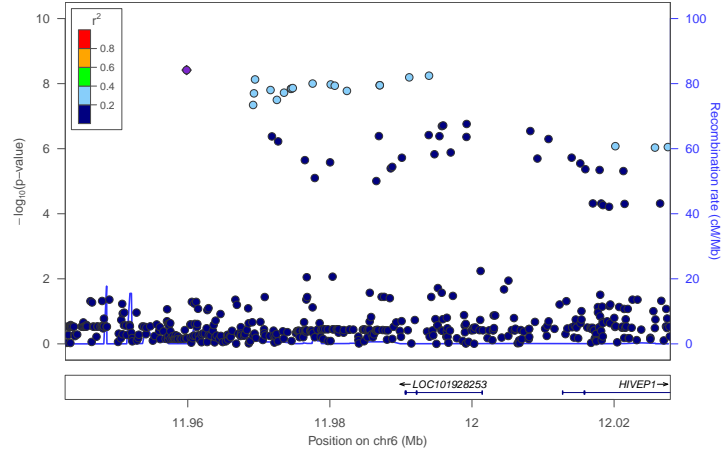

rs198800

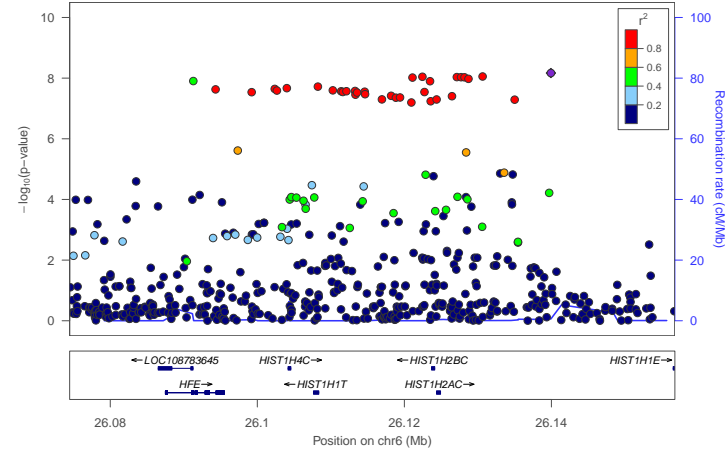

rs483143

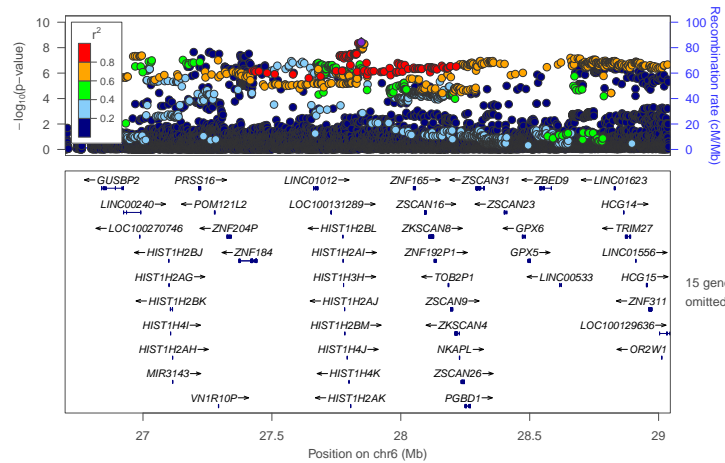

rs6986

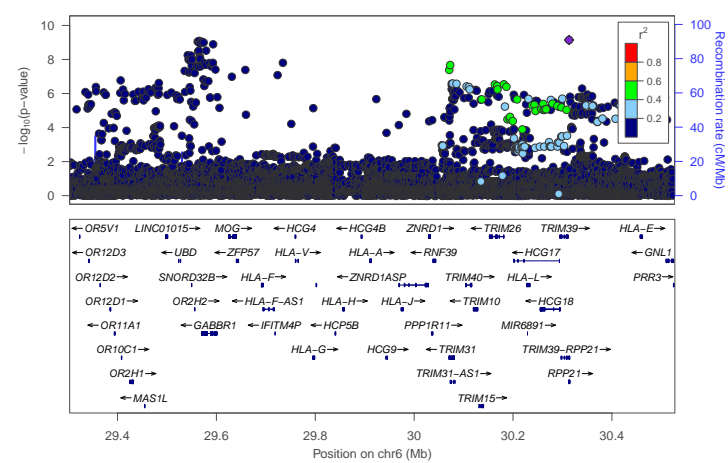

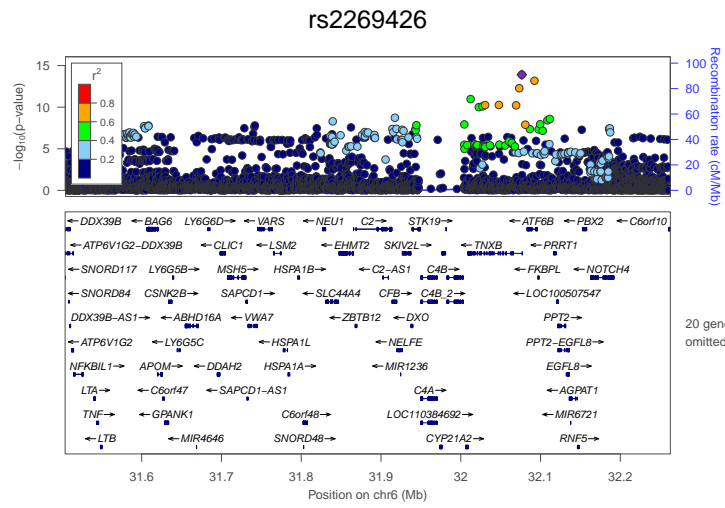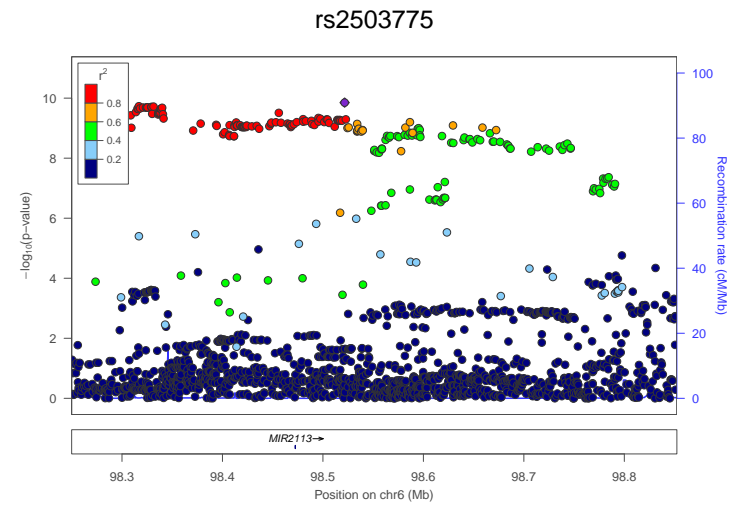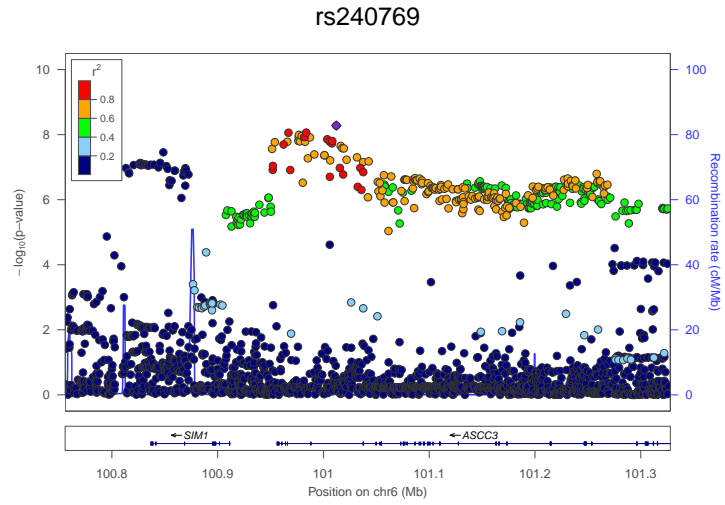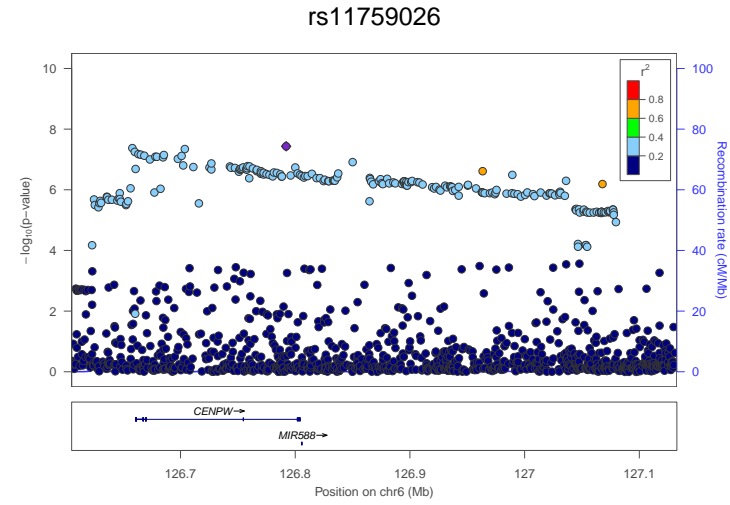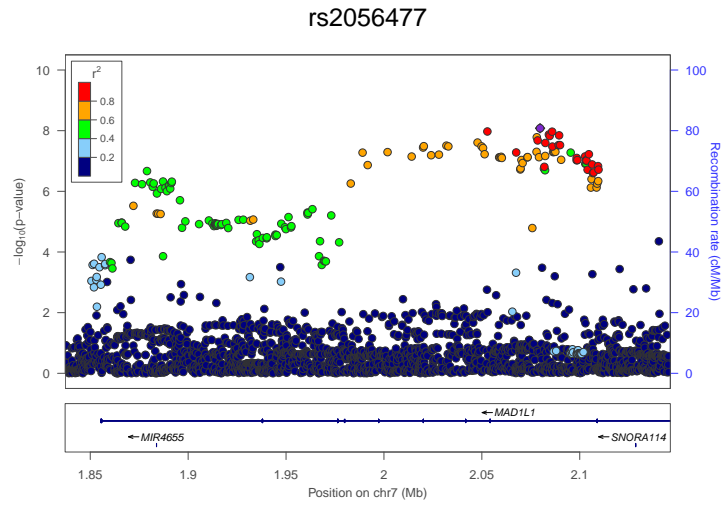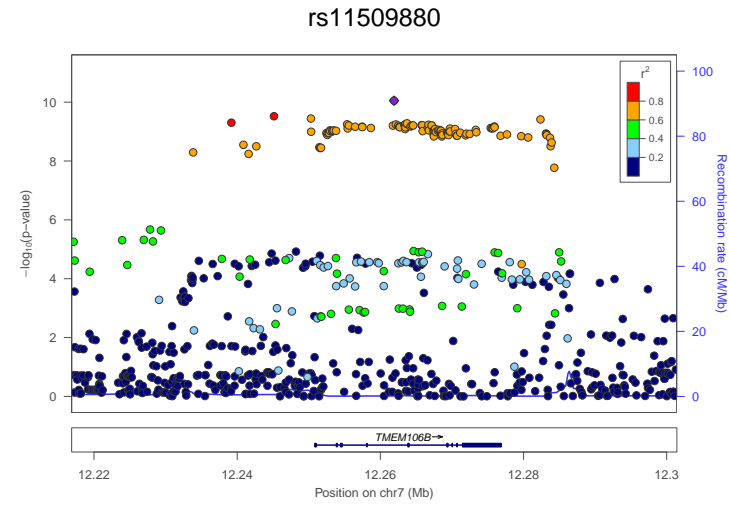

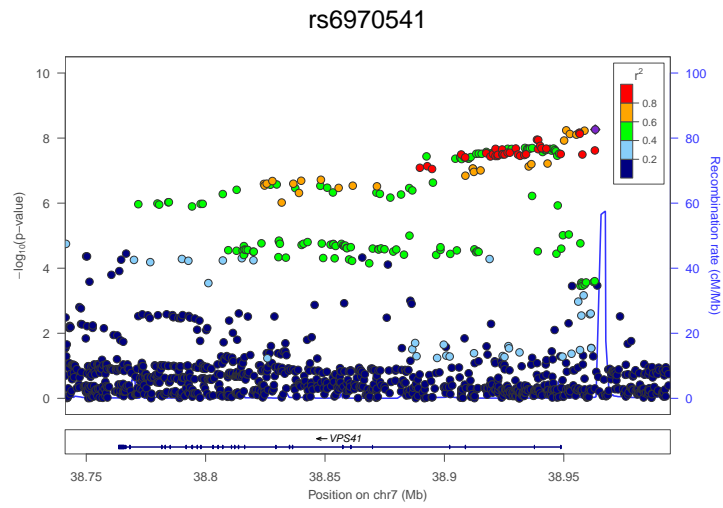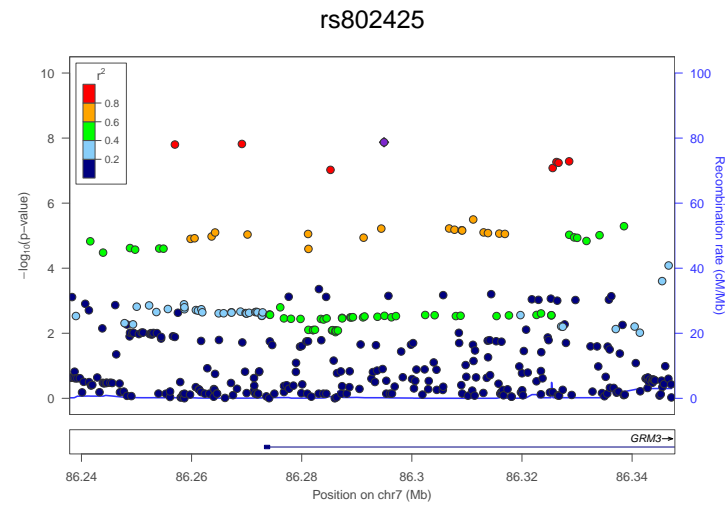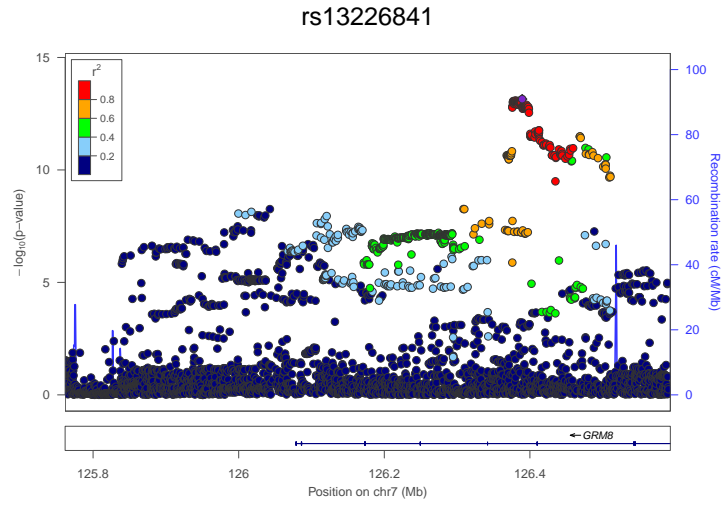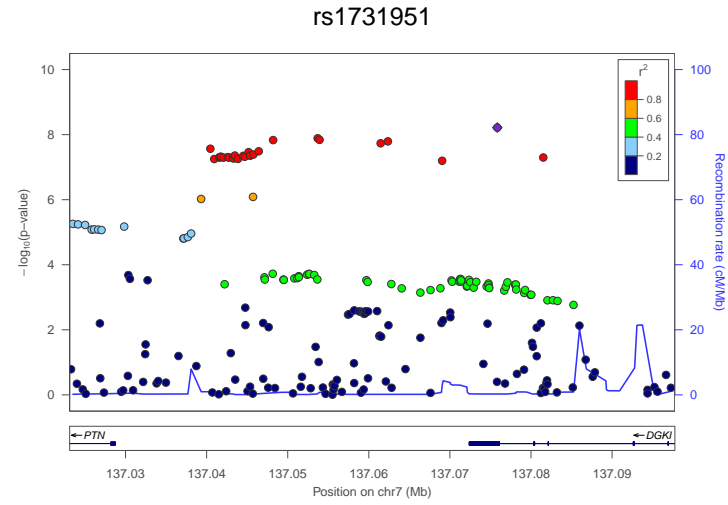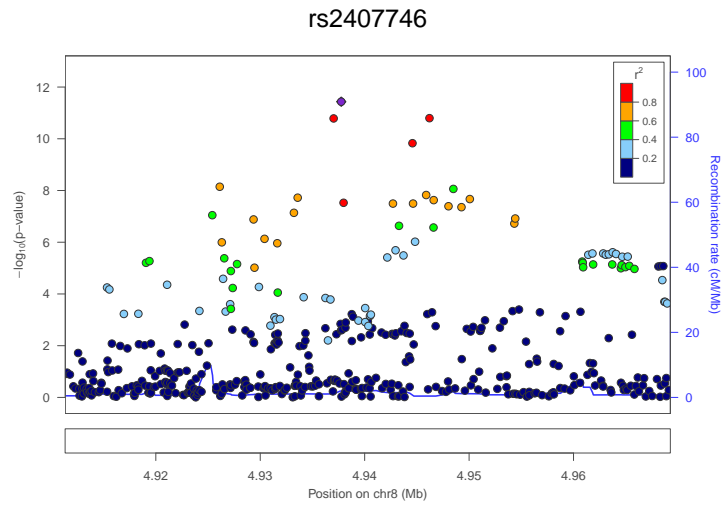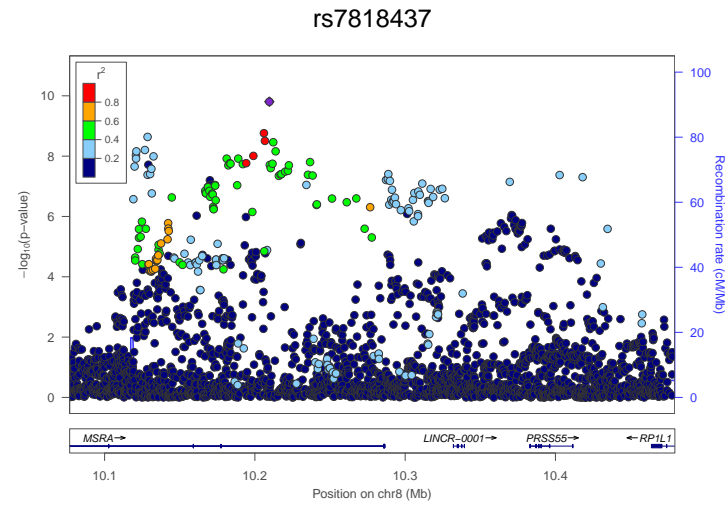

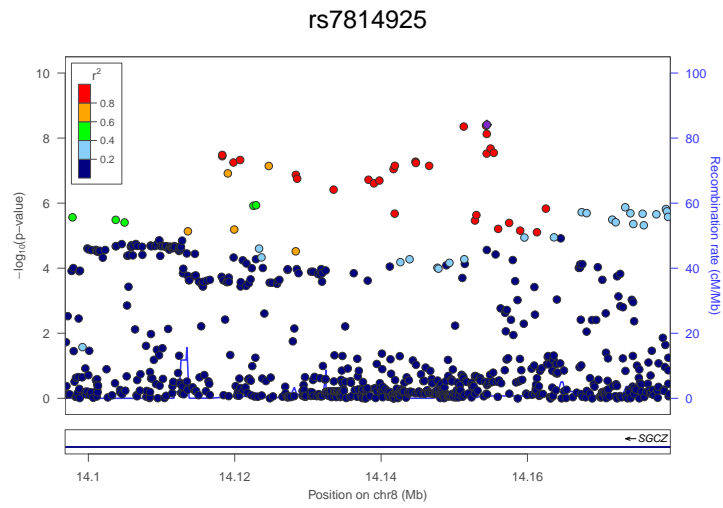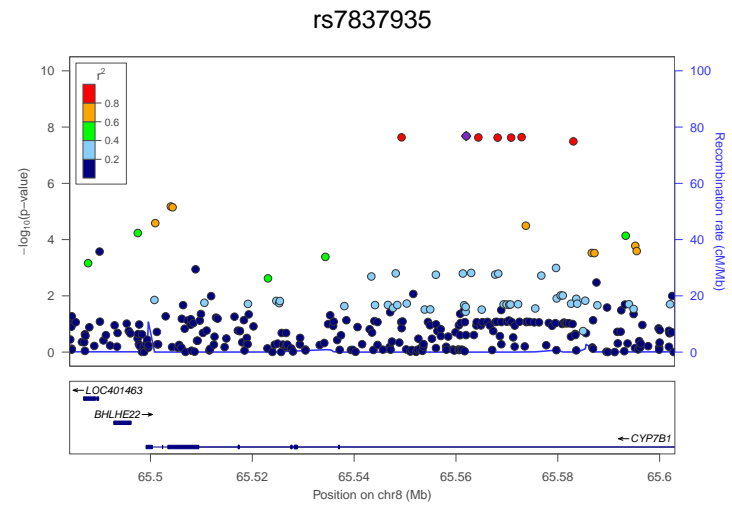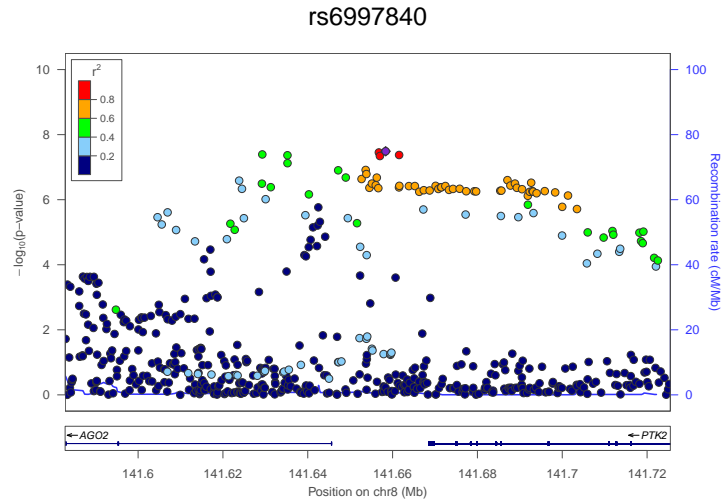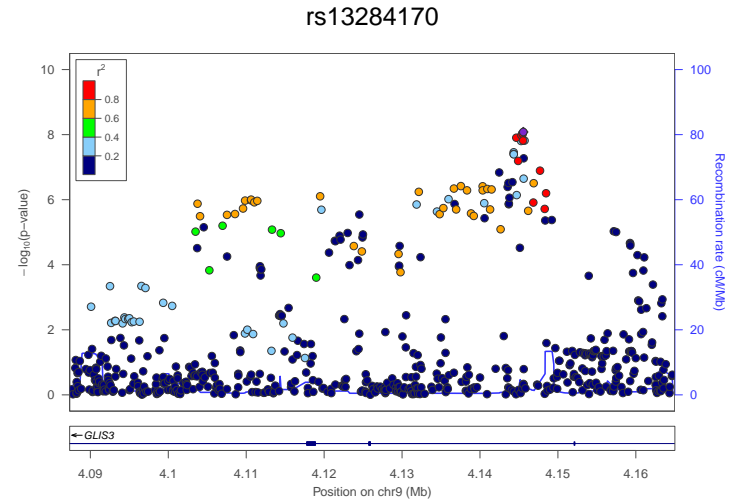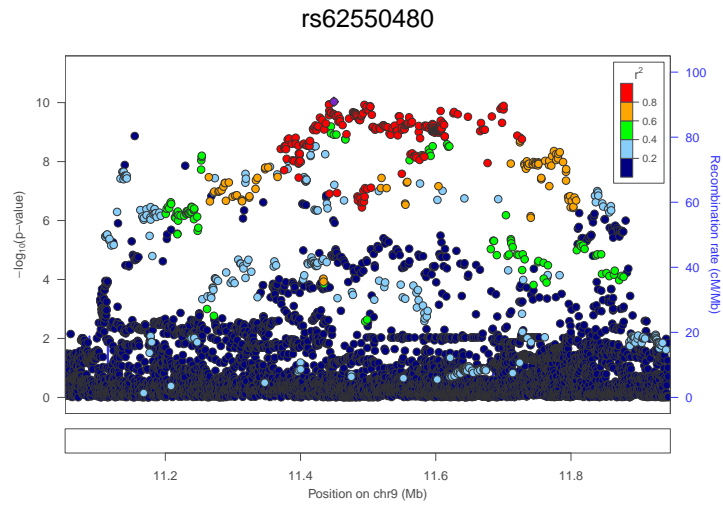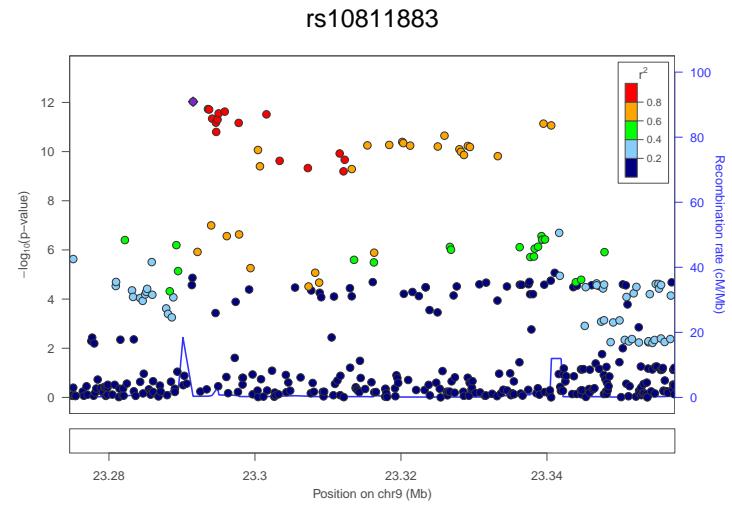

rs10119773

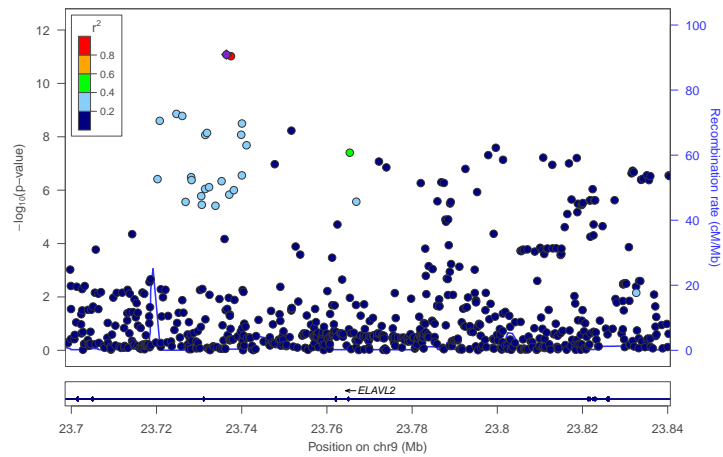

rs7033345

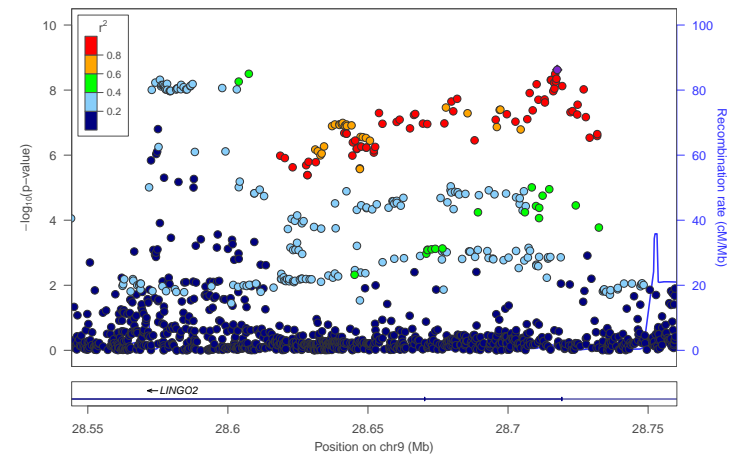

rs111975

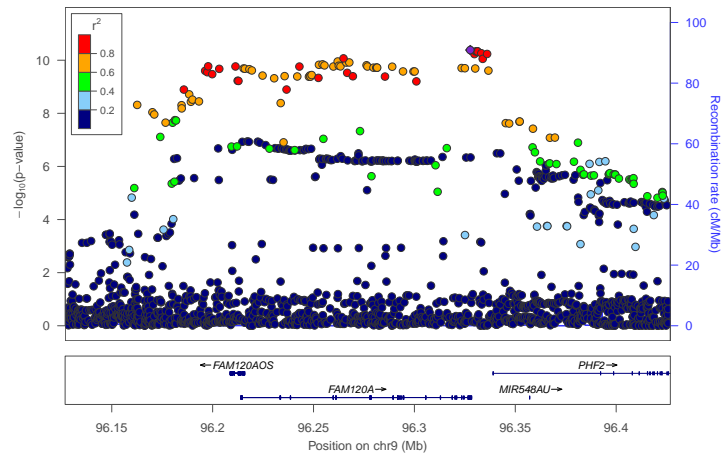

rs75614054

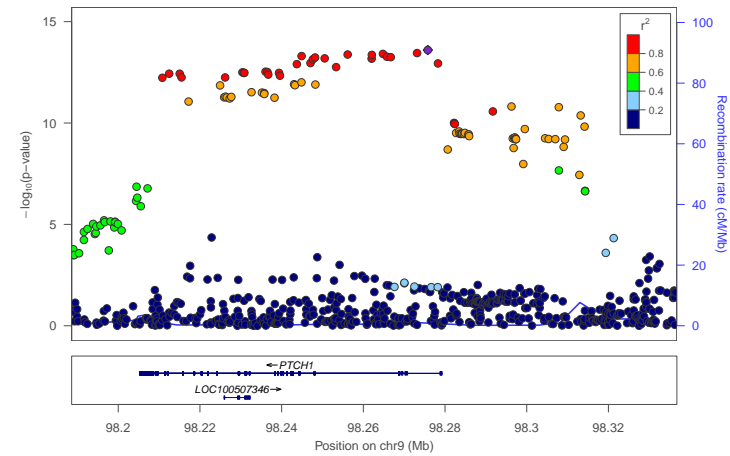

rs2149351

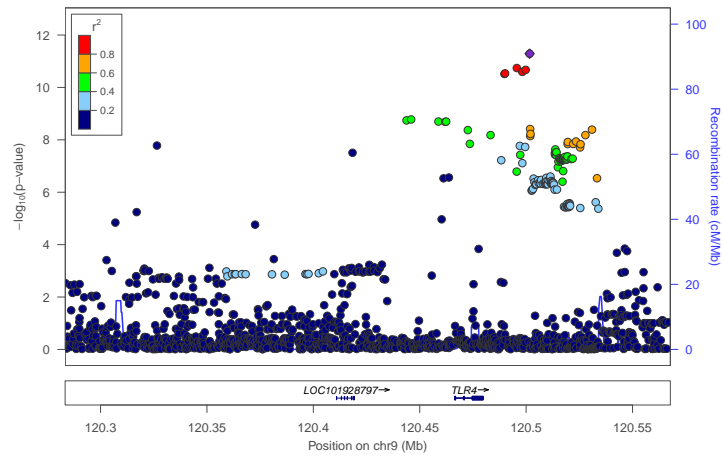

rs72759273

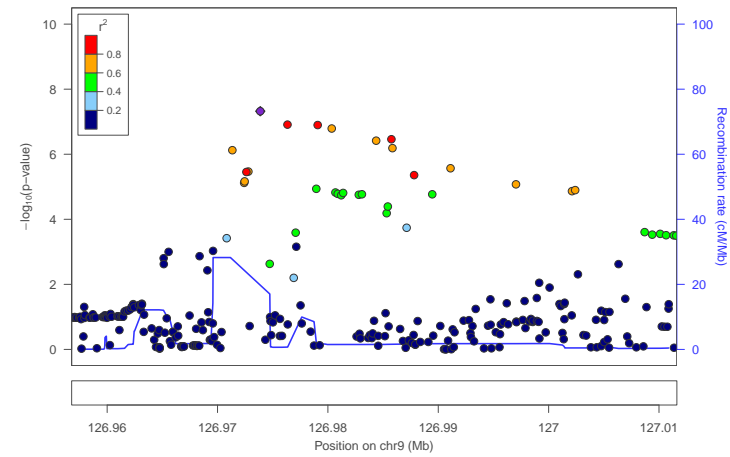

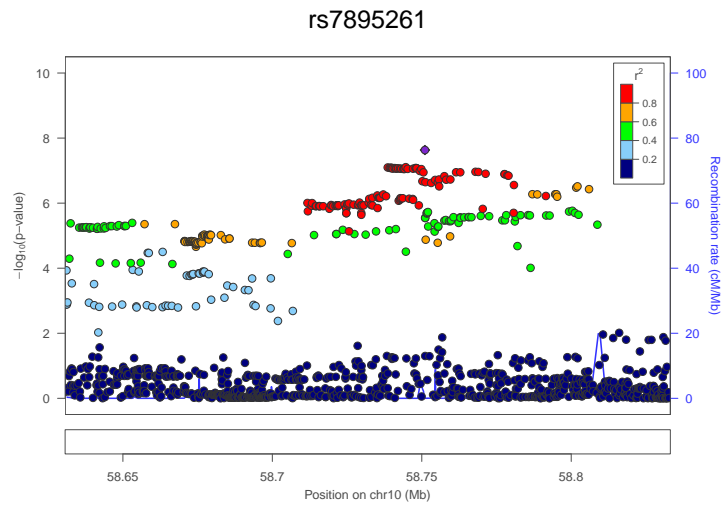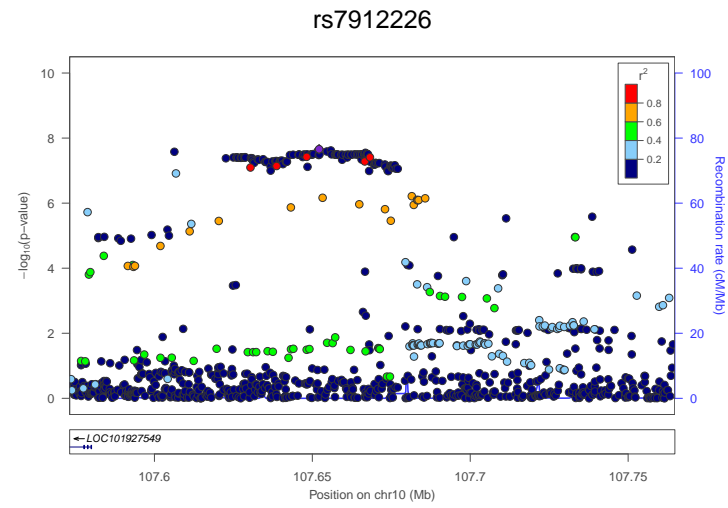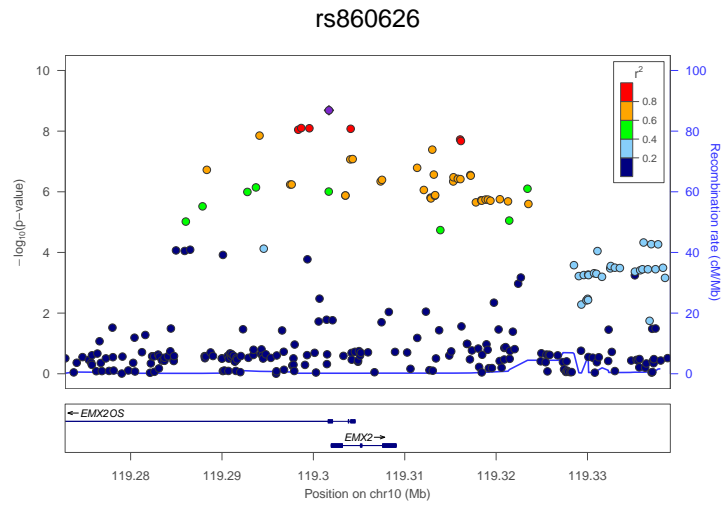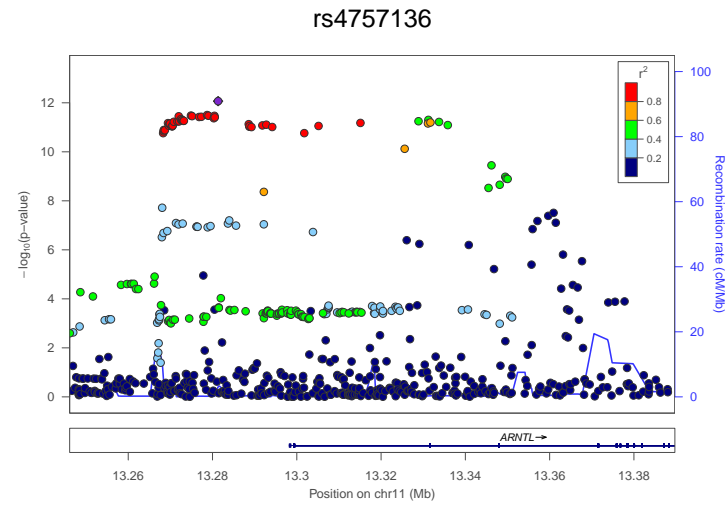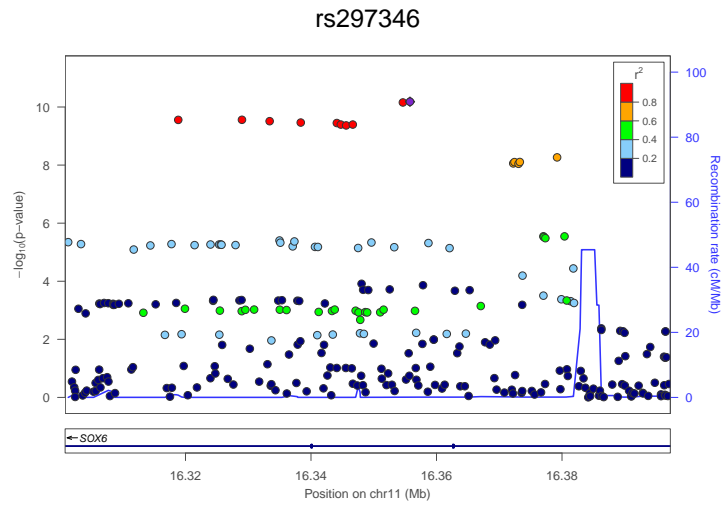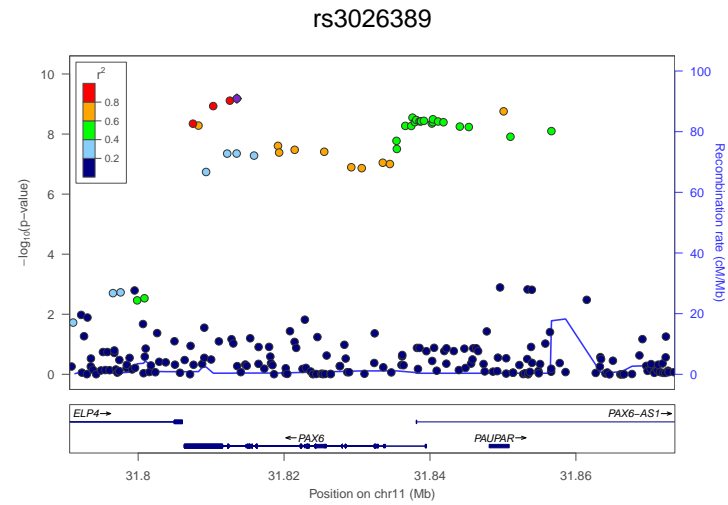

rs55702830

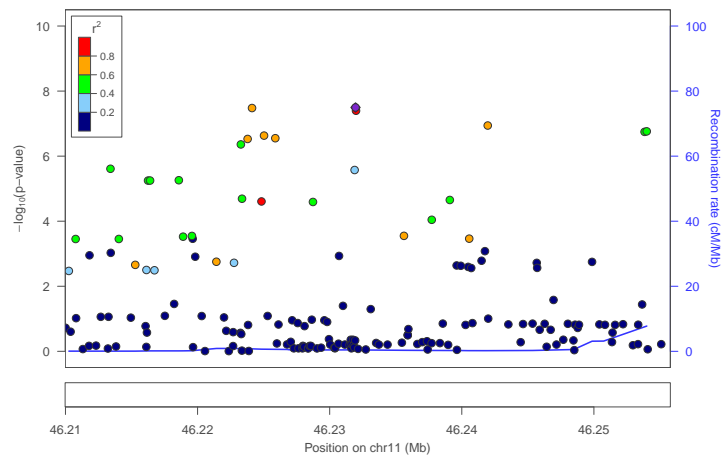

rs11039182

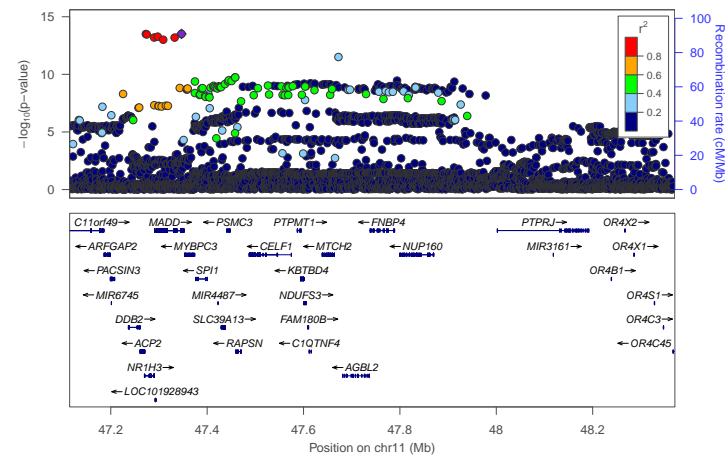

rs10896636

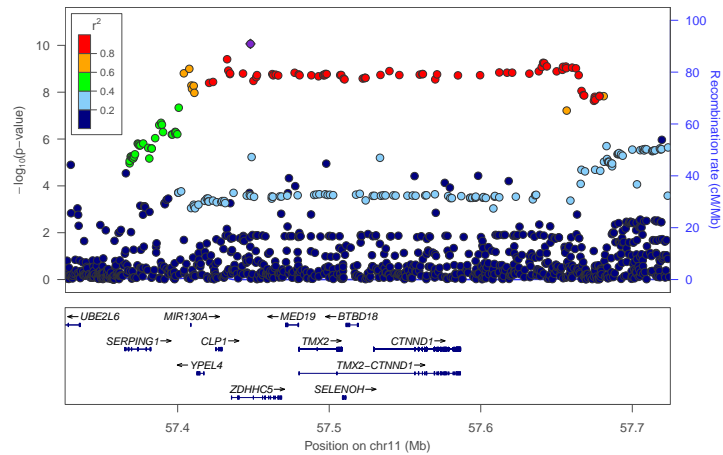

rs674437

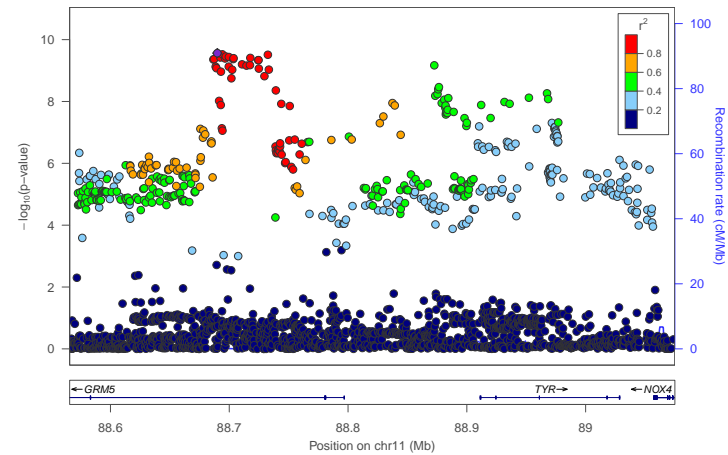

rs4245154

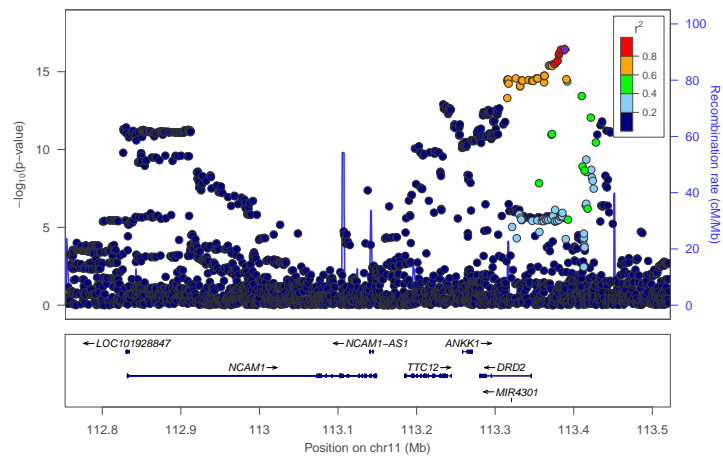

rs73034263

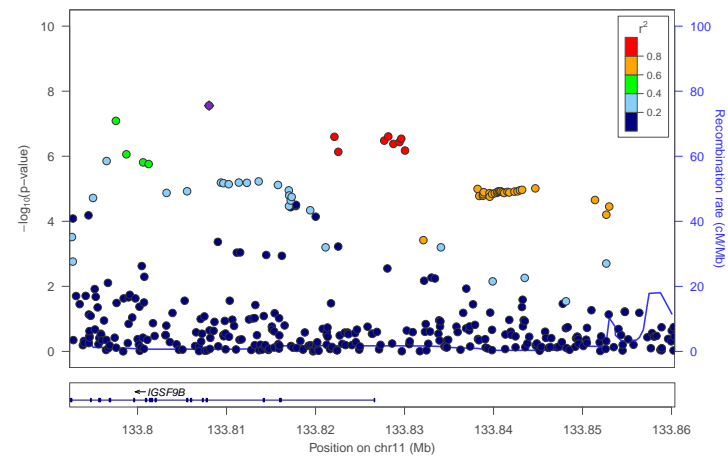

rs11608355

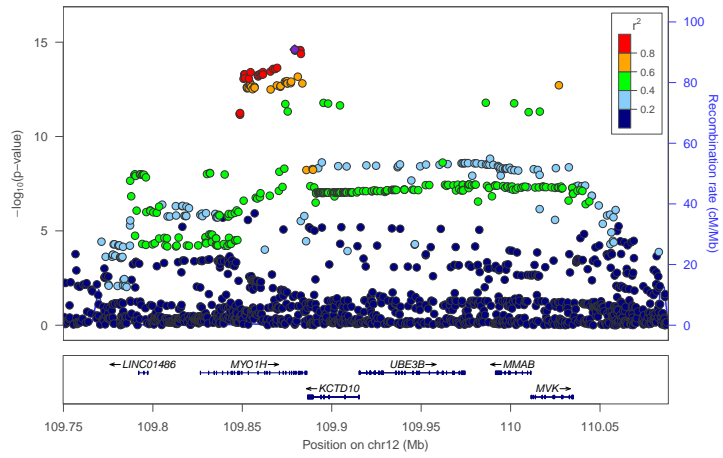

rs10507274

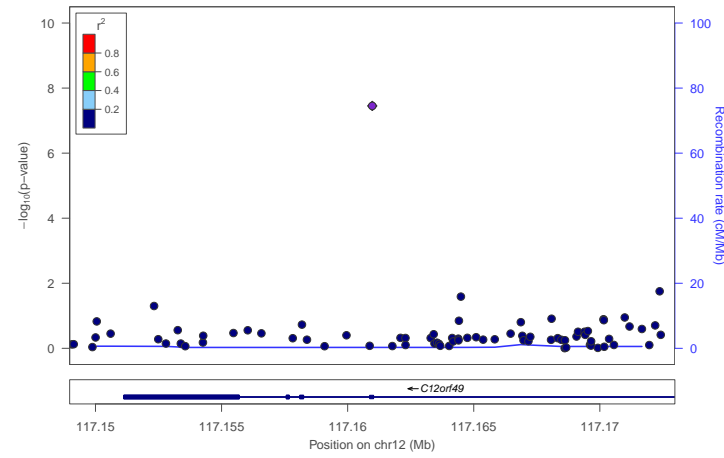

rs3741475

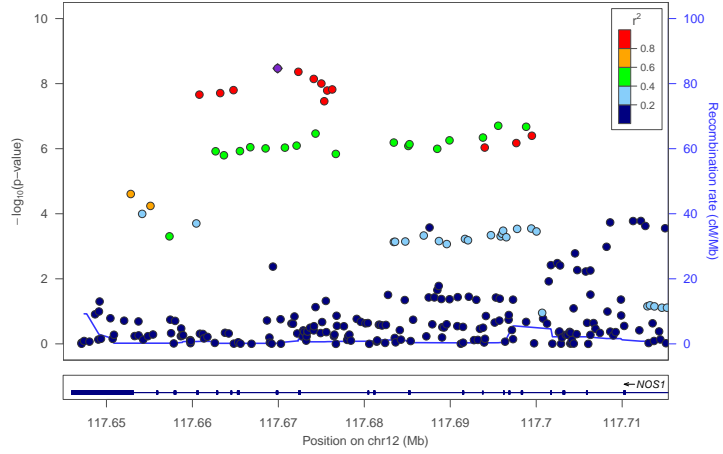

rs6490177

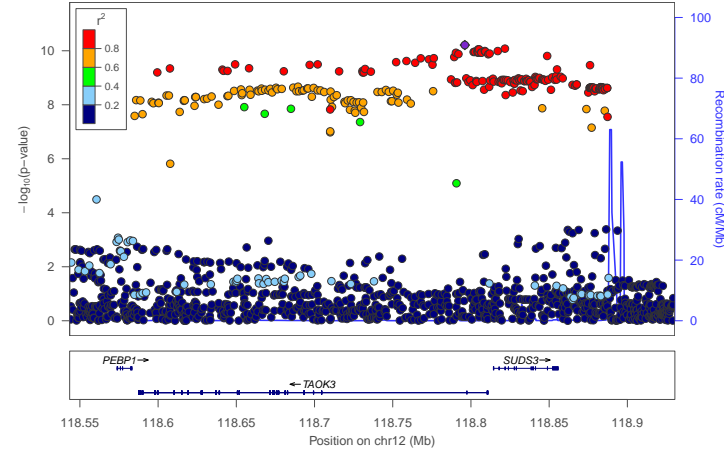

rs3124426

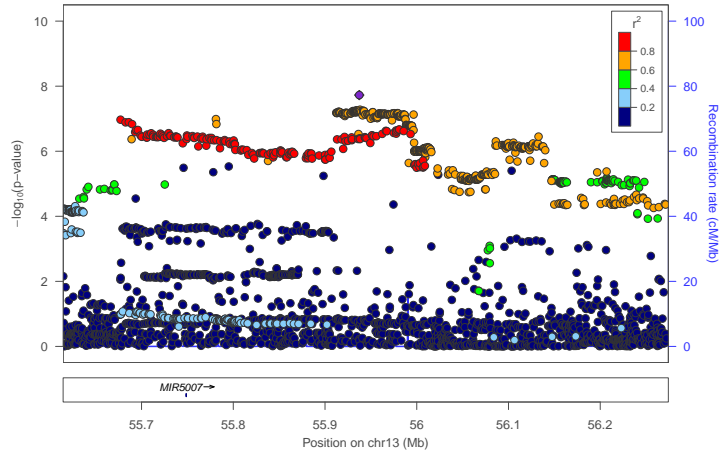

rs4444227

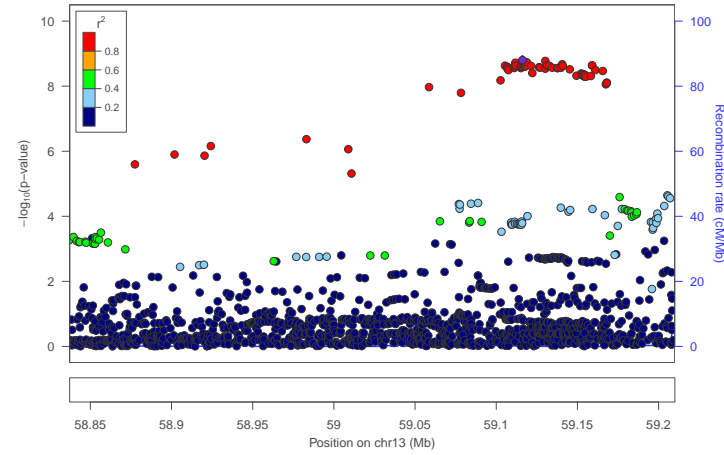



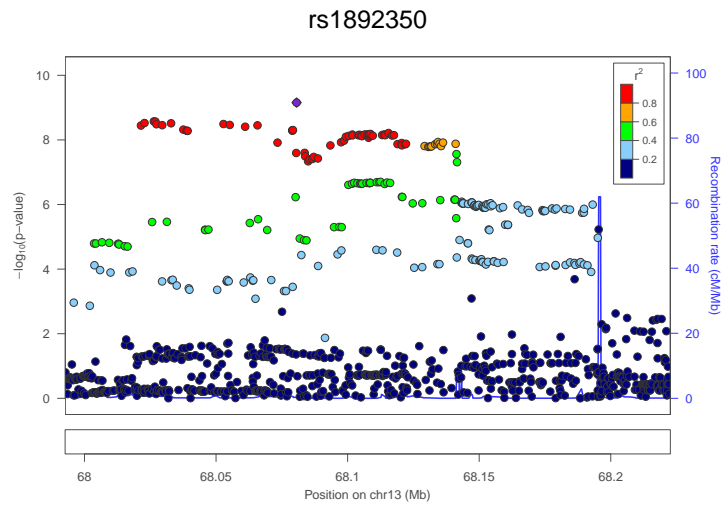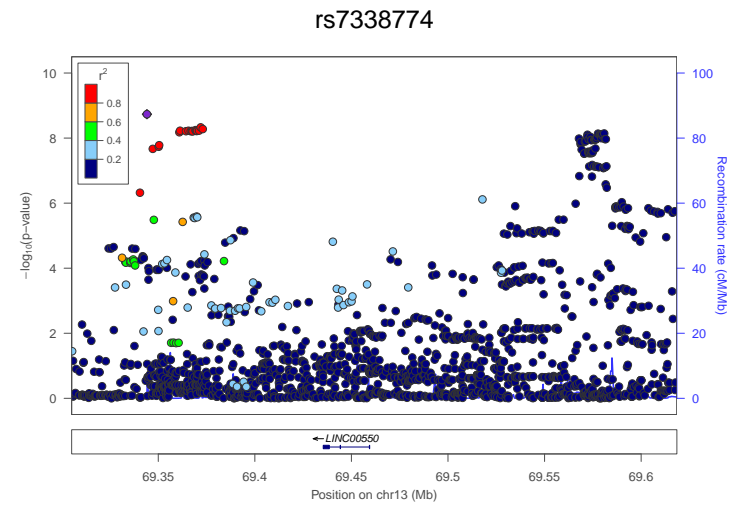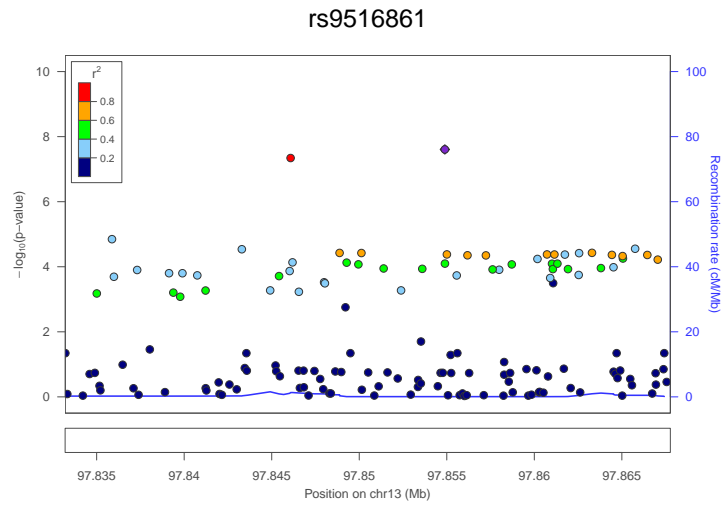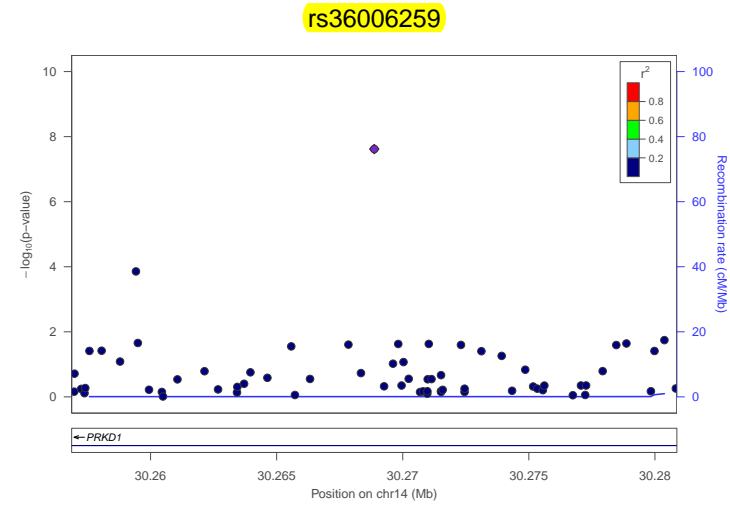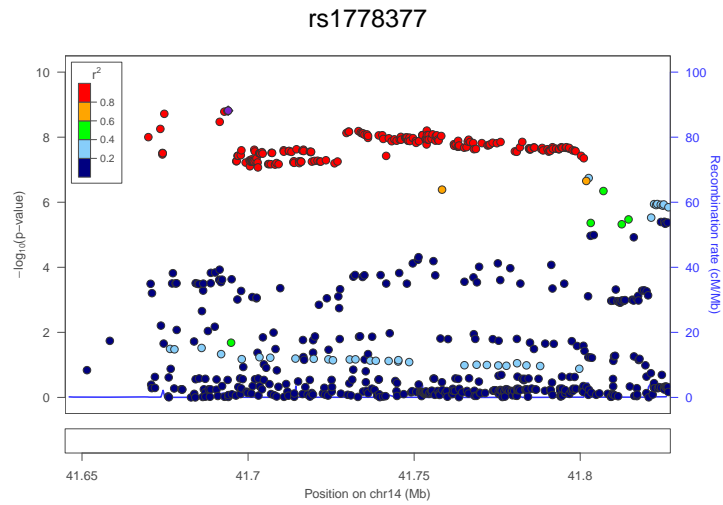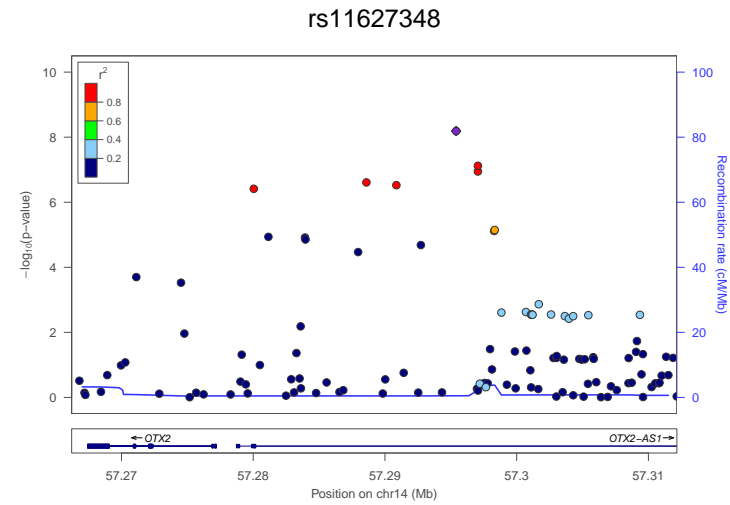

rs4902704

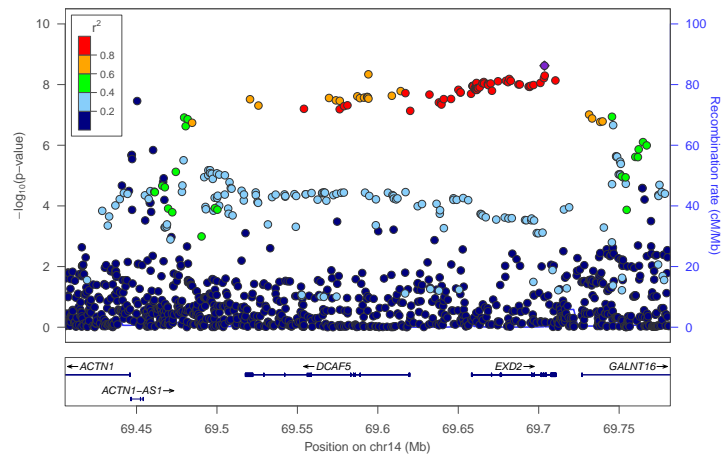

rs10144845

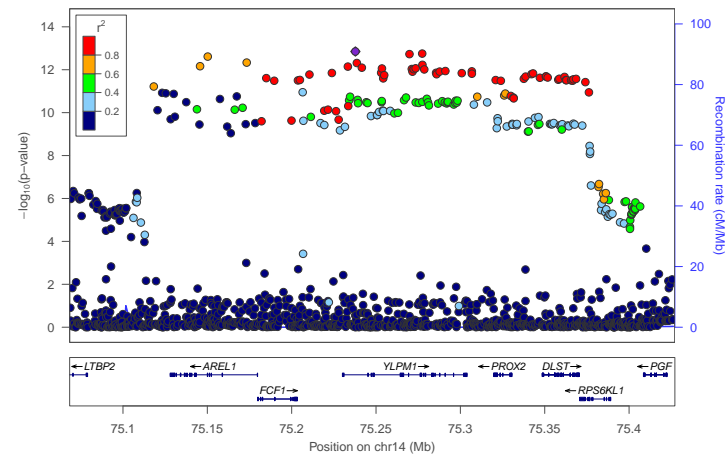

rs12902680

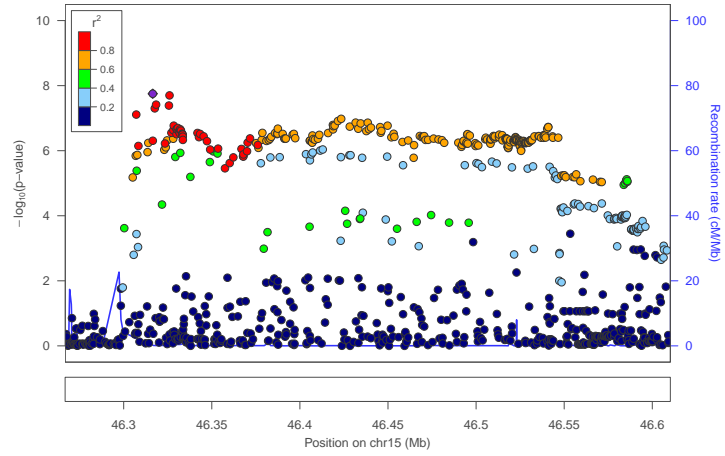

rs12903078

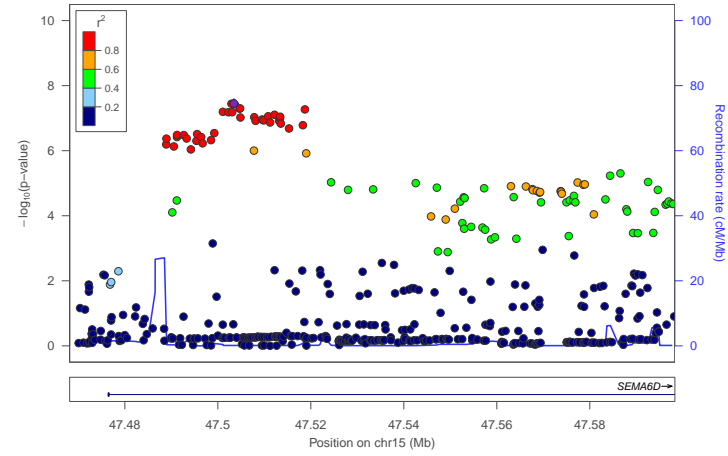

rs3936093

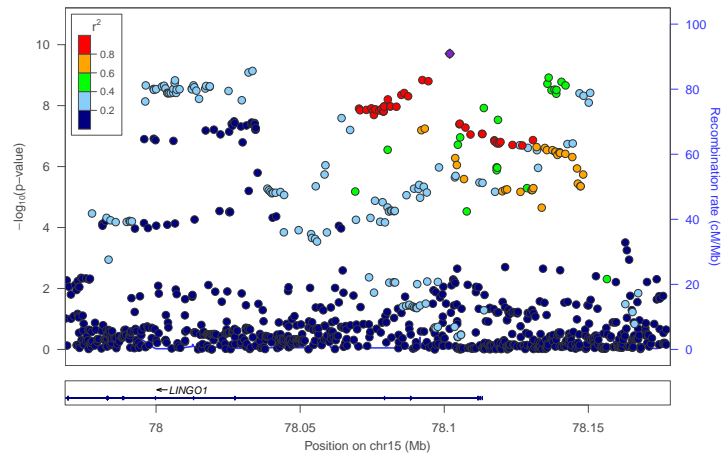

rs4362360

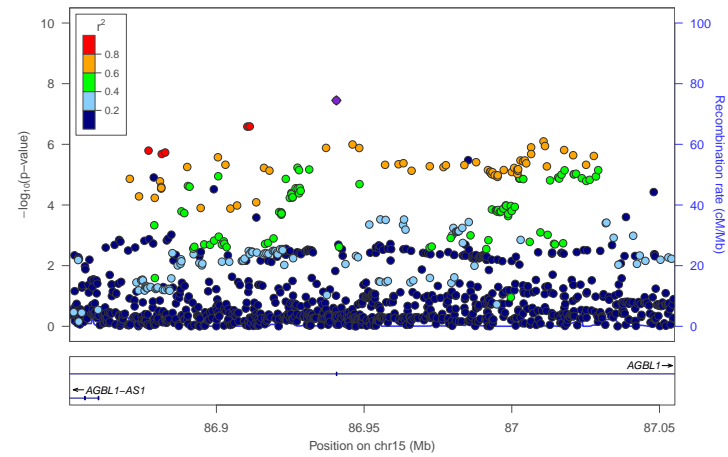

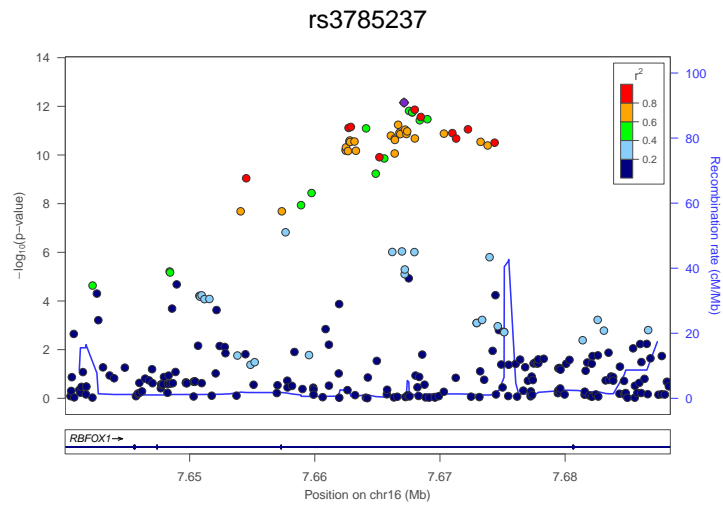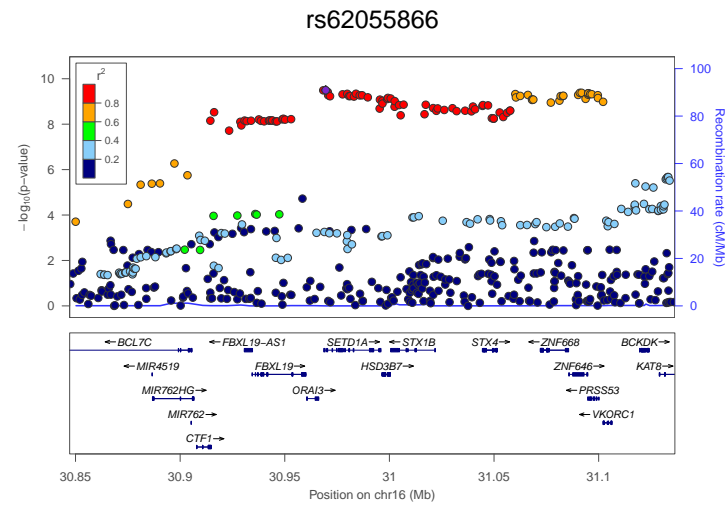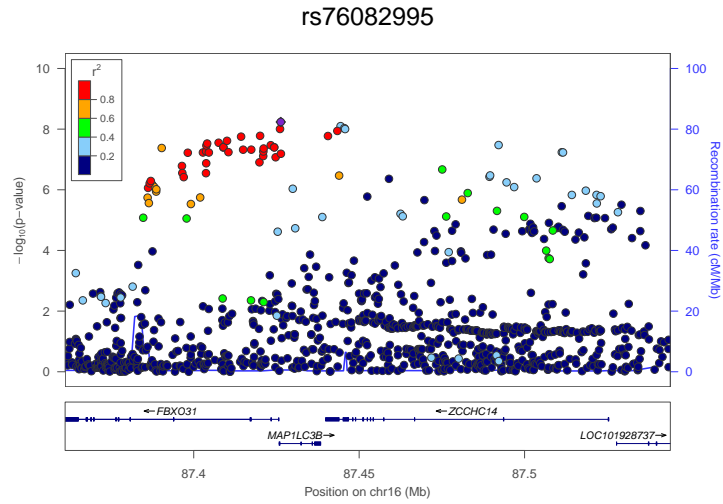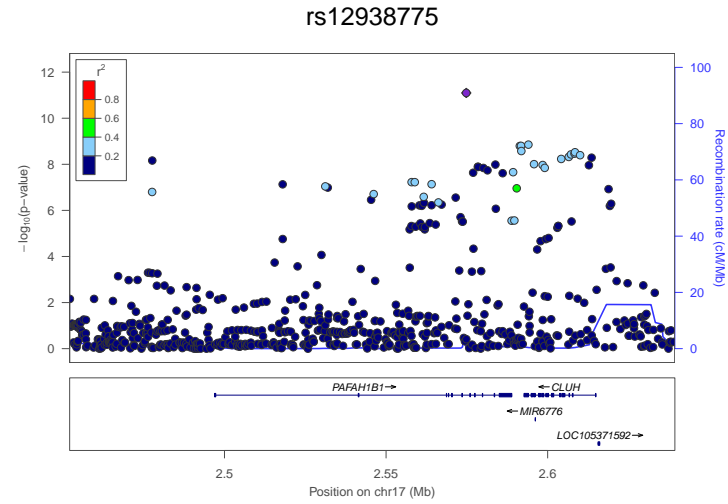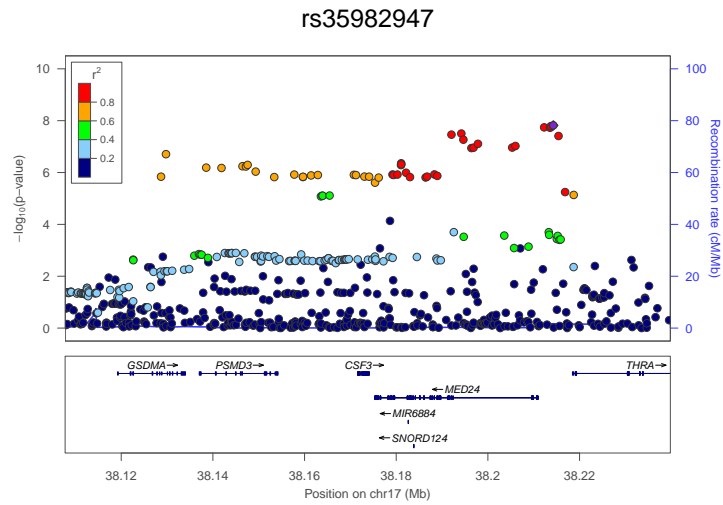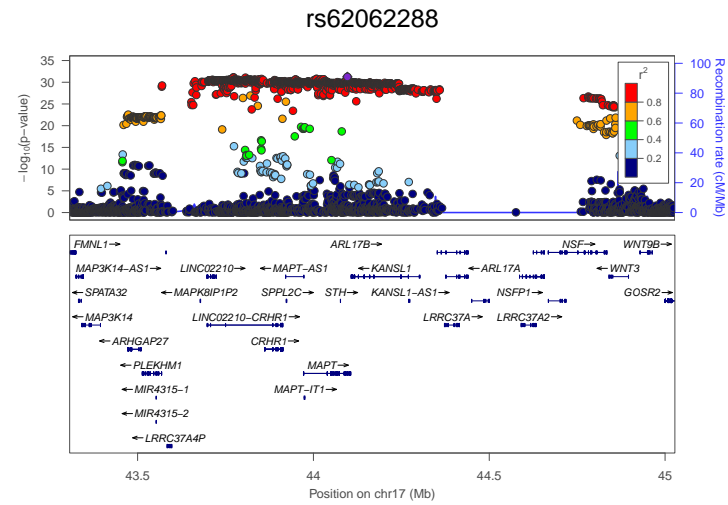

rs56084168

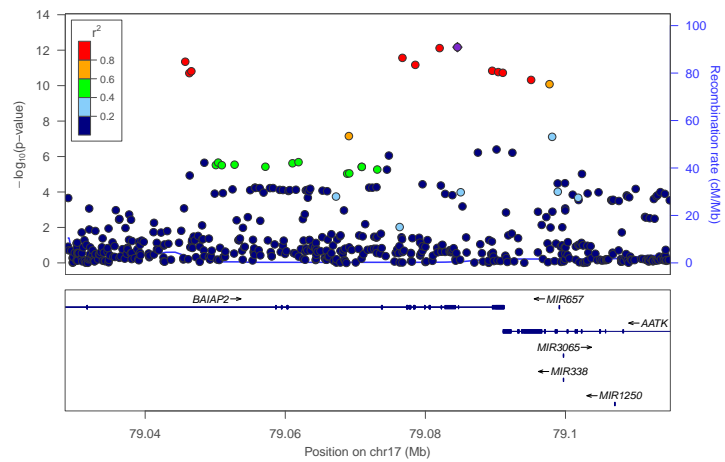

rs10460051

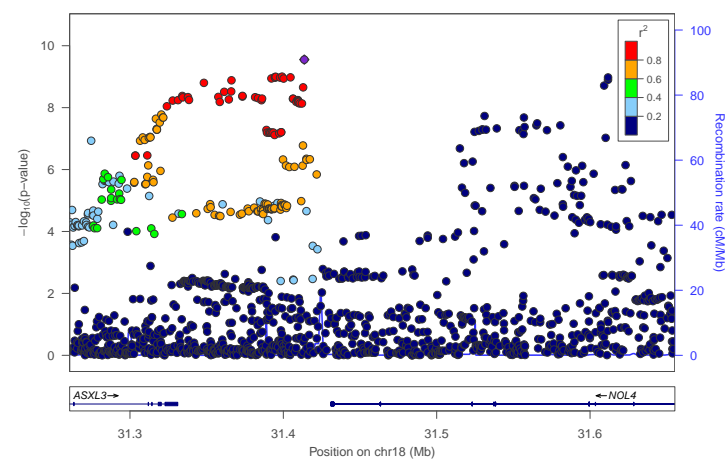

rs11082011

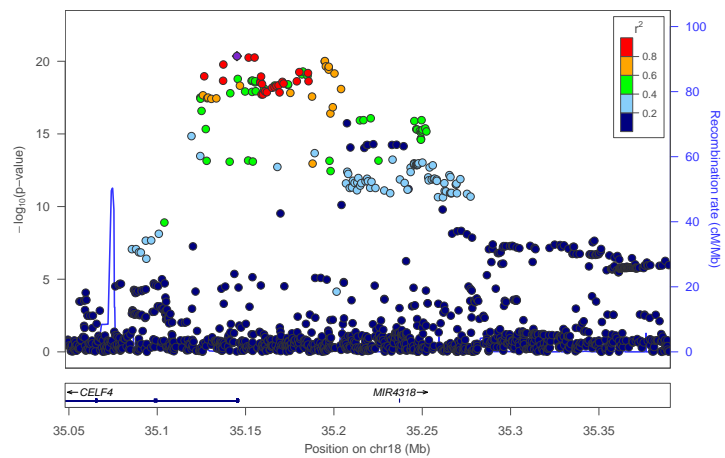

rs11875397

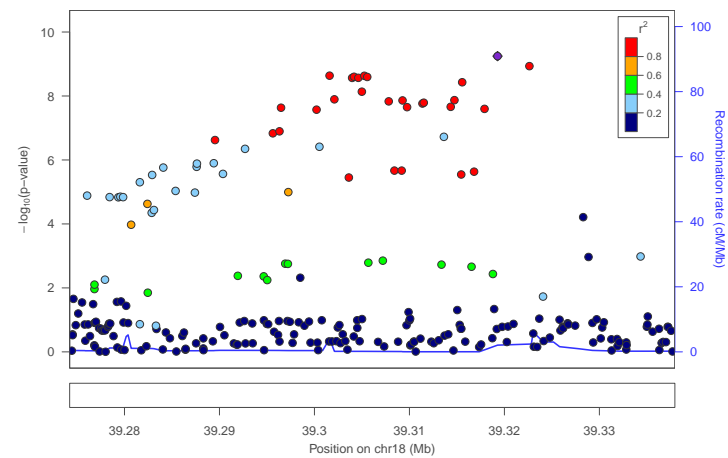

rs17487484

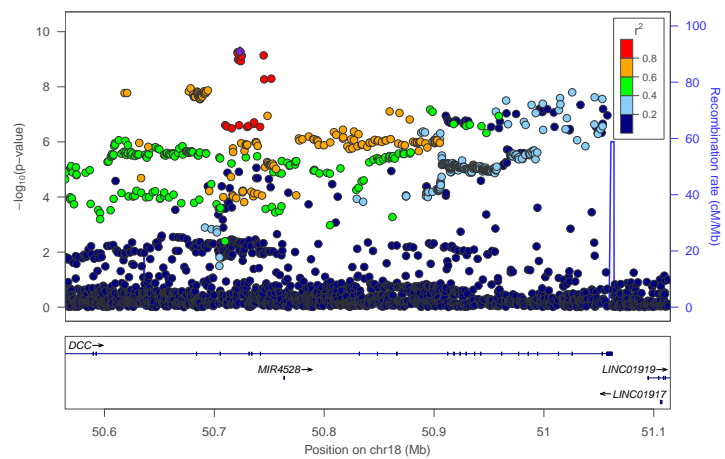

rs1452789

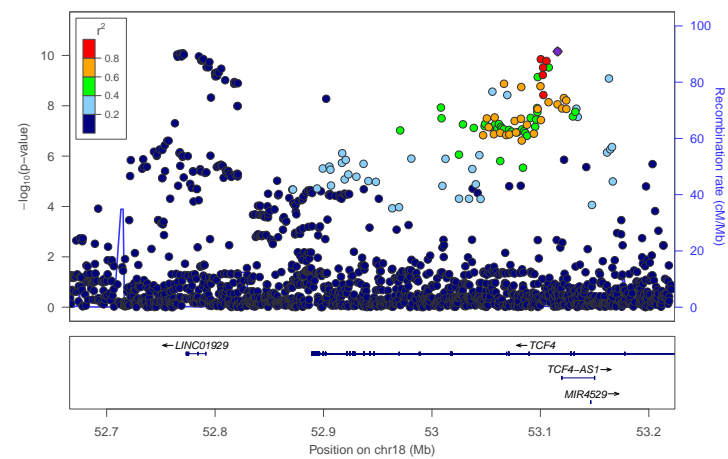

rs2295094

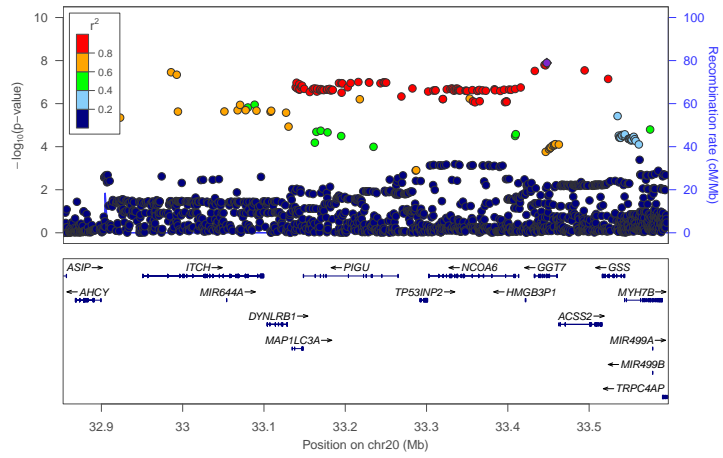

rs4578918

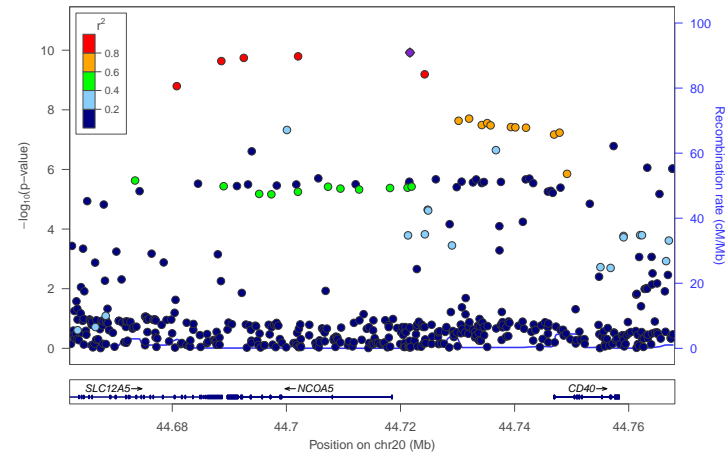

rs11090045

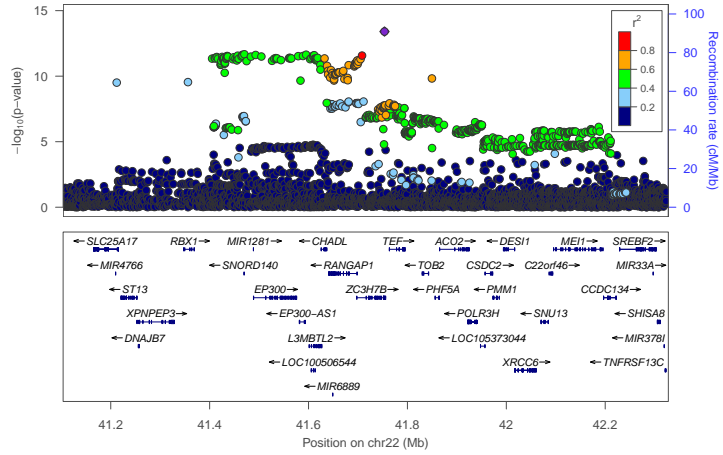

**Supplementary Figure 17. Regional plots of GWA analyses of the neuroticism sum-score.**

The  $y$ -axis represents the negative logarithm (base 10) of the SNP  $P$  value and the  $x$ -axis the position on the chromosome, with the name and location of genes in the UCSC Genome Browser in the bottom panel. The SNP with the lowest  $P$  value in the region is marked by a purple diamond. The colors of the other SNPs indicate the  $r^2$  of these SNPs with the lead SNP, with grey color indicating SNPs below the user-defined  $r^2$ . Plots are generated with LocusZoom. See **Supplementary Data 2** for an overview of all lead SNPs for which a regional plot is presented above. For excluded loci (see **Methods; Supplementary Data 3-4**) the rsID's are marked yellow.

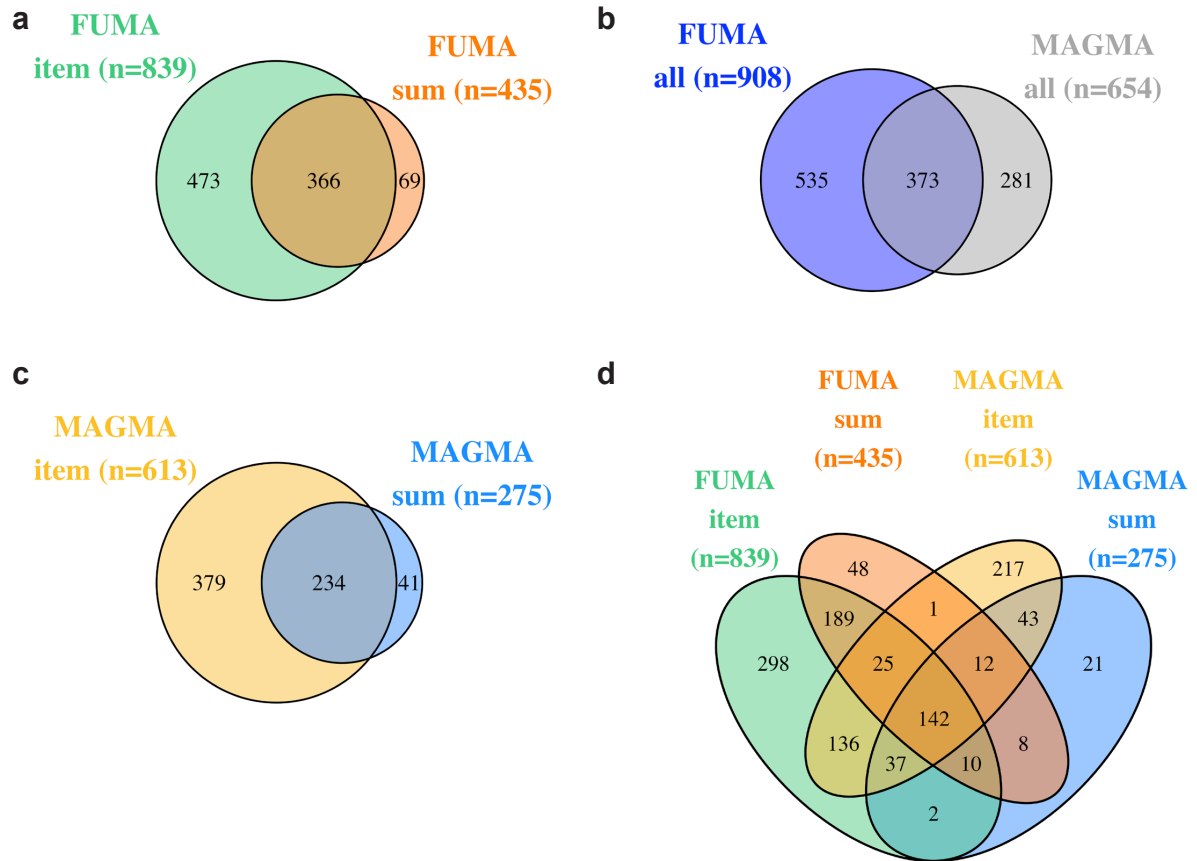

**Supplementary Figure 18. Venn diagrams of overlap between genes implicated by SNP-based (FUMA) versus gene-based (MAGMA) analyses of the 12 neuroticism items and the sum-score.**

(a) Overlap in number of genes implicated by FUMA in SNP-based analyses of the 12 neuroticism items and the sum-score. (b) Overlap in number of genes implicated by SNP-based analyses in FUMA versus gene-based analyses in MAGMA. (c) Overlap in number of genes identified in MAGMA's gene-based analyses of the 12 neuroticism items and the sum-score. (d) Overlap between genes implicated by FUMA and MAGMA for the 12 neuroticism items and the neuroticism sum-score.

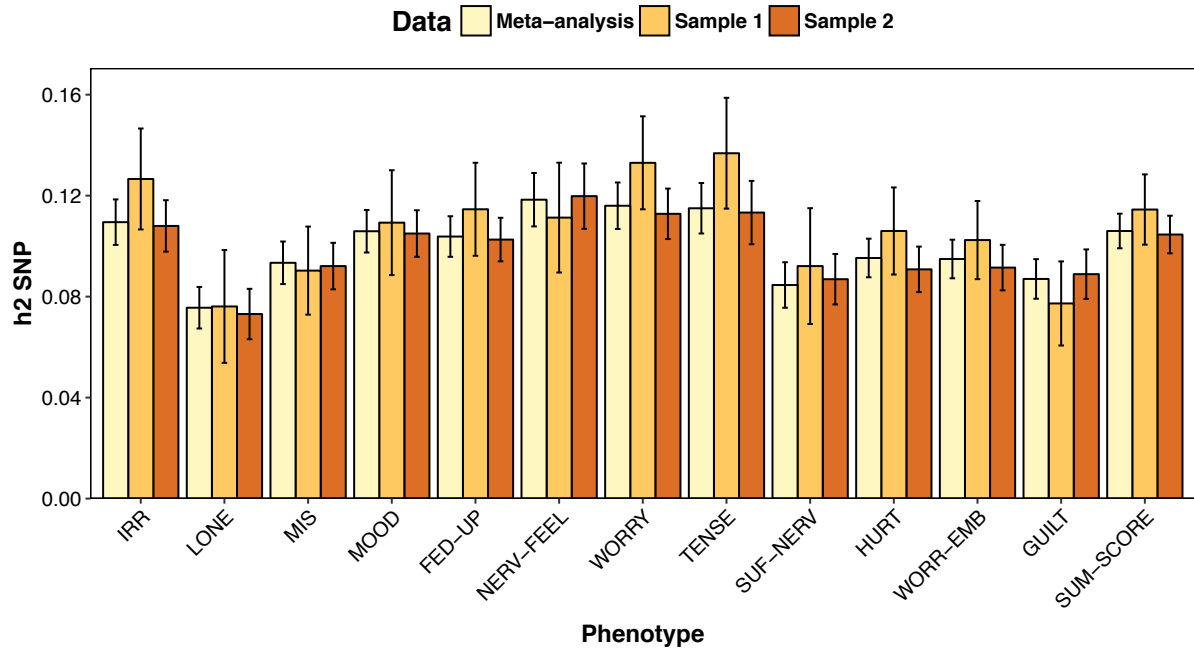

**Supplementary Figure 19. SNP-based heritability for the 12 neuroticism items and the sum-score.**

SNP-based heritability was computed on summary statistics of sample 1, sample 2, and the meta-analysis results of both samples, using LD score regression<sup>6</sup>. Error bars represent 95% confidence intervals.



$P < 0.5$

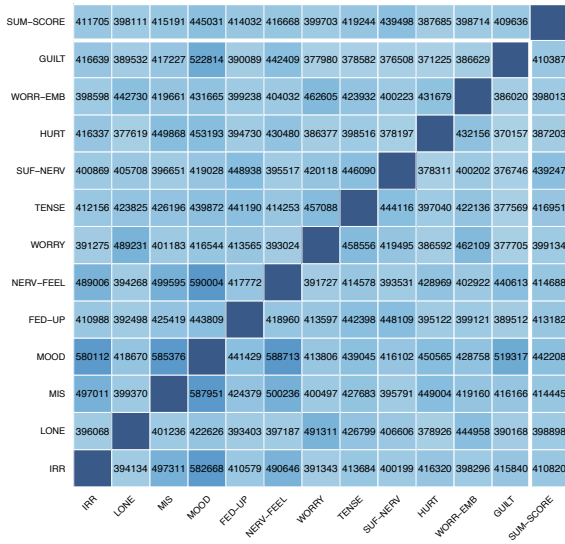

$P < 1e-5$

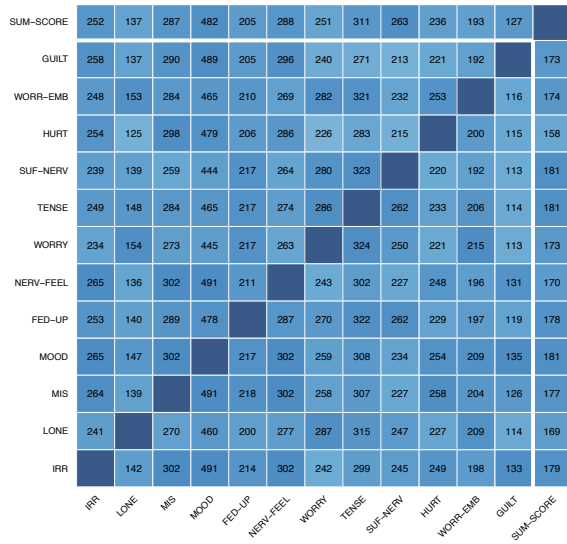

$P < 5e-8$

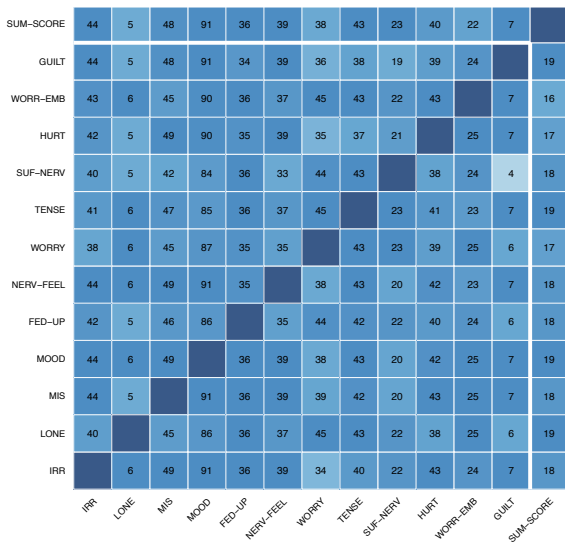

$P < 3.85e-9$

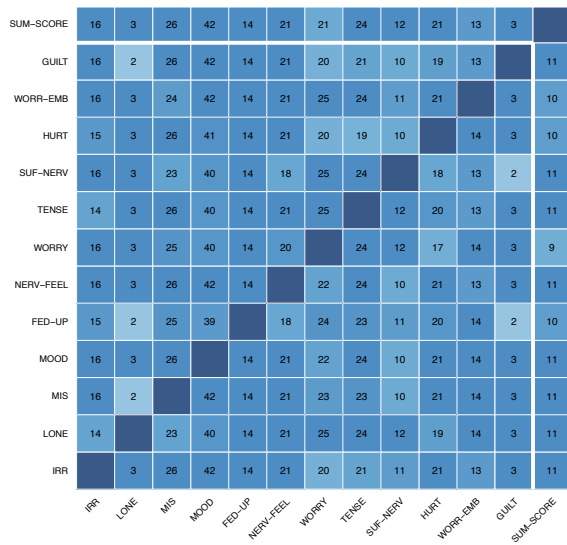

Digits in the cells indicate the number of SNPs for that specific combination of phenotypes that exceeded the given  $P$  value threshold. The depicted heatmaps are not symmetrical, as LD-based clumping was performed on both phenotypes (see **Methods** and **Supplementary Note 1**).

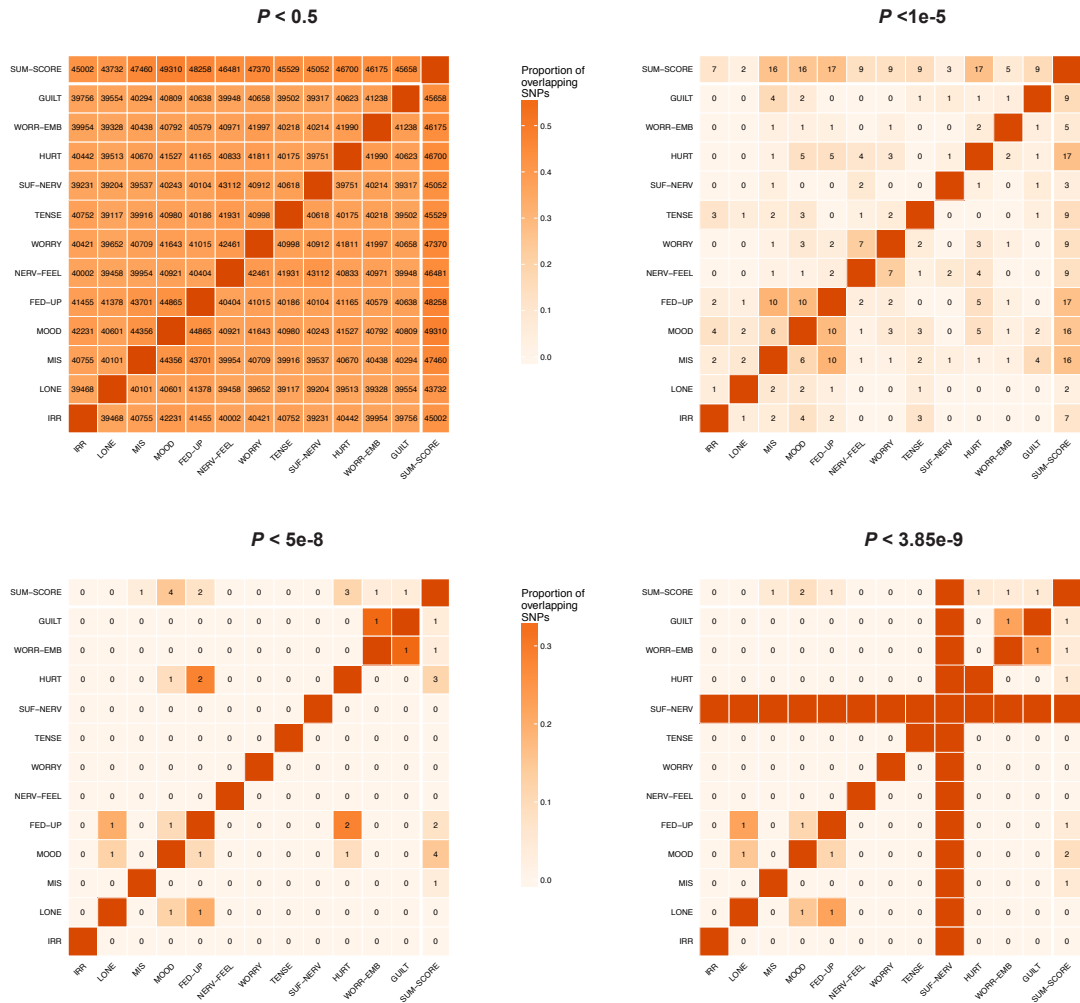

**Supplementary Figure 21. Heatmaps showing the results from Fisher’s exact test for overlap in the top SNPs (for different  $P$  value thresholds).**

Digits in the cells indicate the number of SNPs for that specific combination of phenotypes that exceeded the given  $P$  value threshold (see **Methods** and **Supplementary Note 1**). If an off-diagonal cell contains no value this indicates that there were no SNPs with a  $P$  value lower than the given threshold for that phenotype. A value ‘0’ indicates that although there were SNPs with  $P$  values lower than the threshold for both phenotypes, these were not the same SNPs. All heatmaps in this figure are symmetric.

IRR - Are you an irritable person?

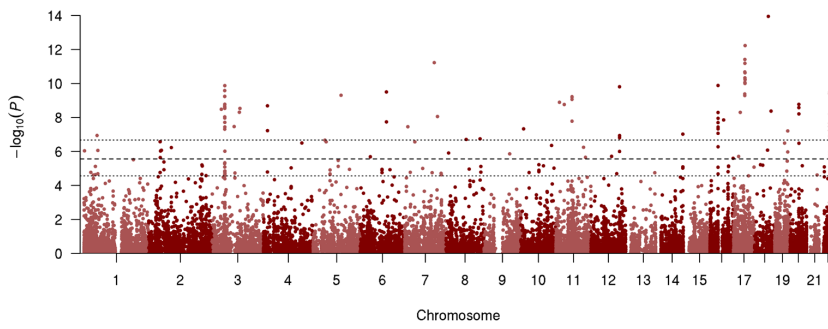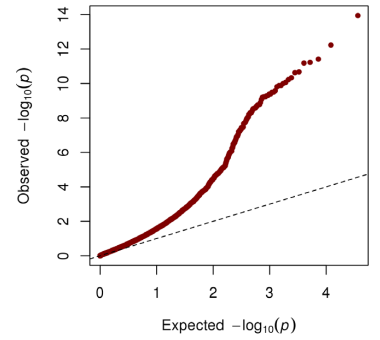

LONE - Do you often feel lonely?

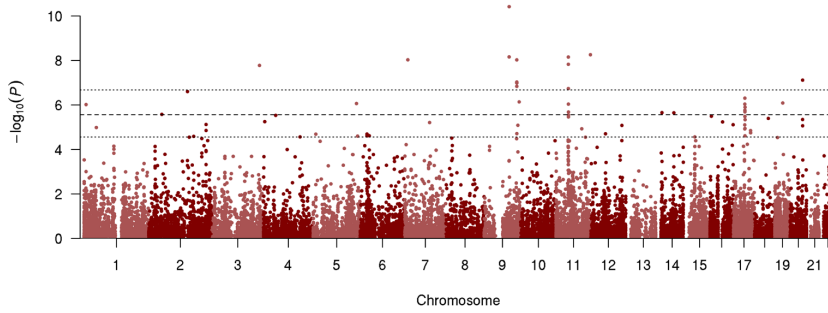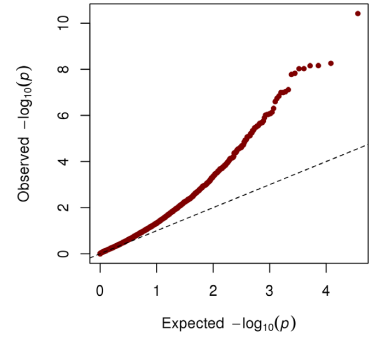

MIS - Do you ever feel 'just miserable' for no reason?

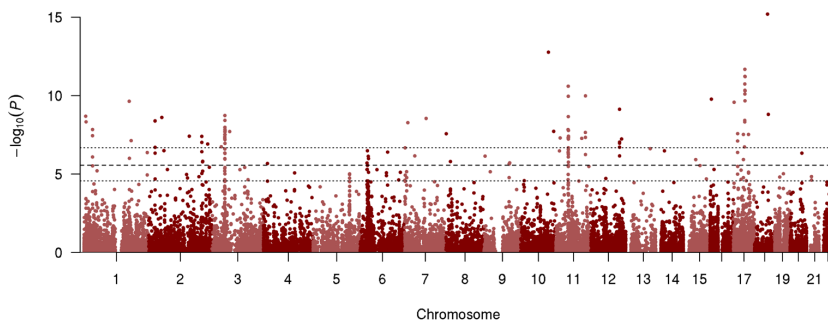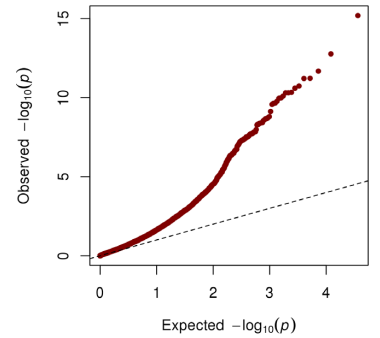

MOOD - Does your mood often go up and down?

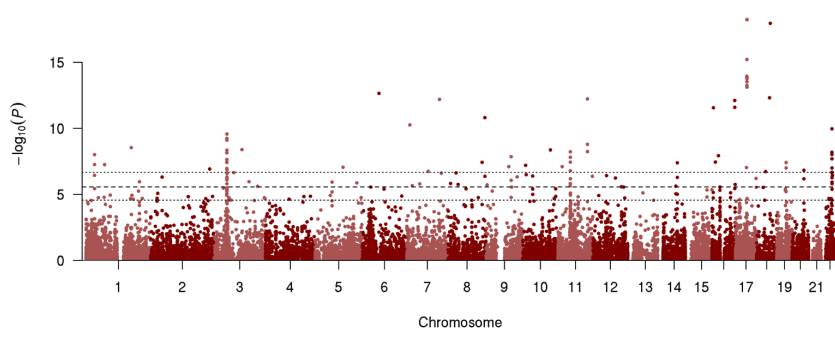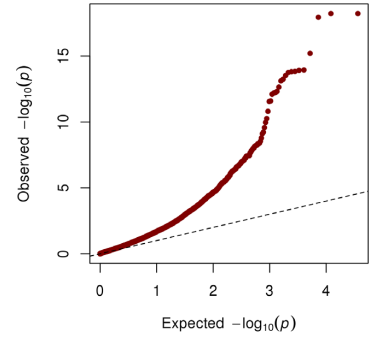

FED-UP - Do you often feel 'fed-up'?

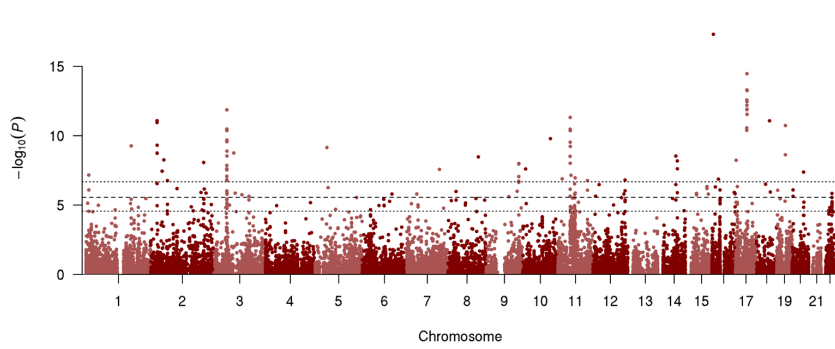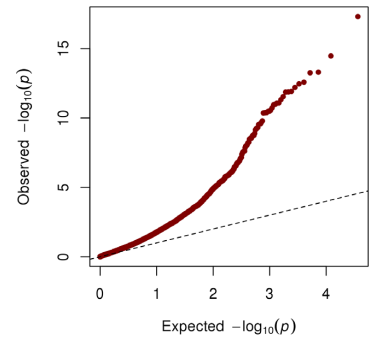

NERV-FEEL - Would you call yourself a nervous person?

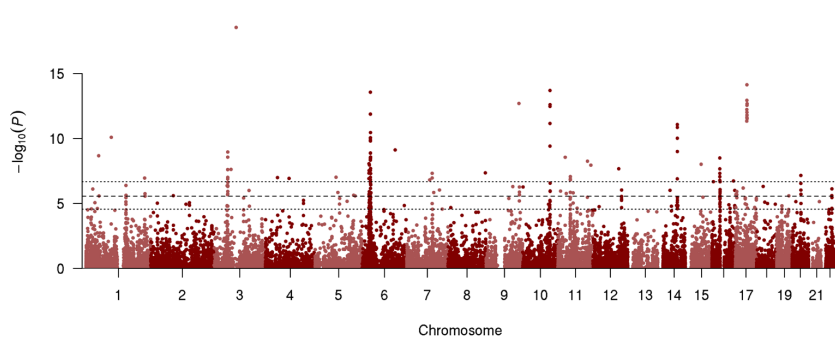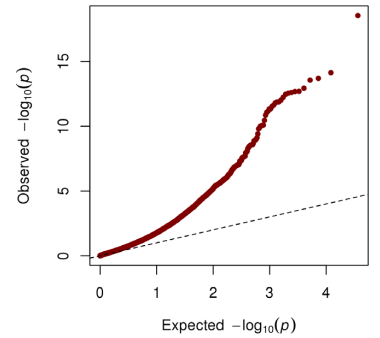

WORRY - Are you a worrier?

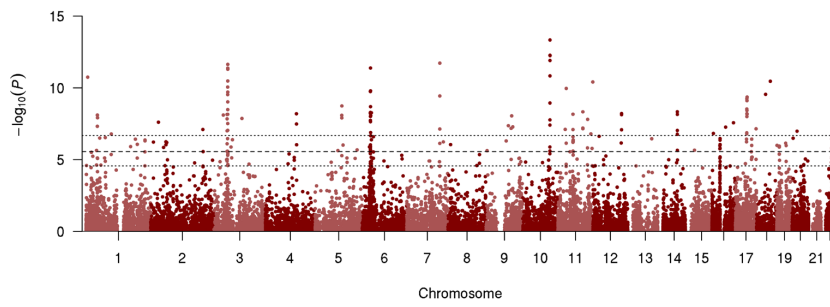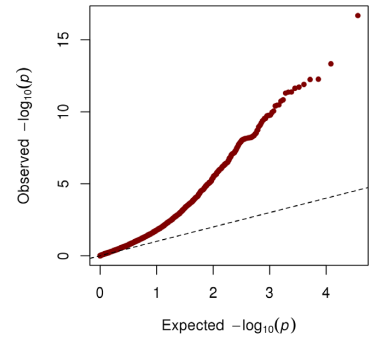

TENSE - Would you call yourself tense or 'highly strung'?

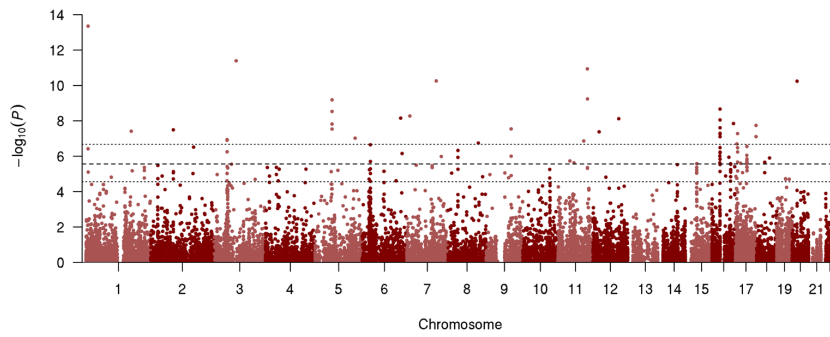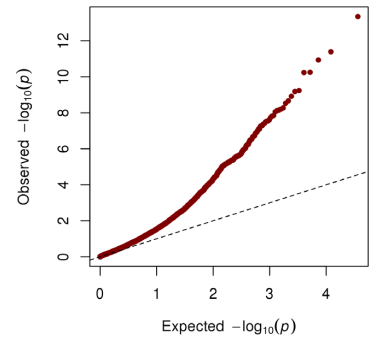

SUF-NERV - Do you suffer from 'nerves'?

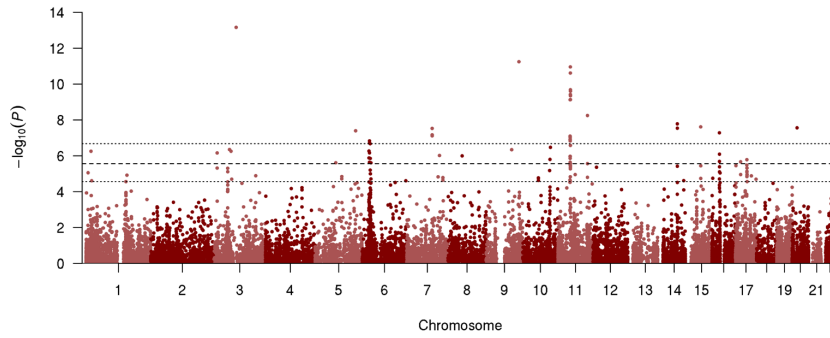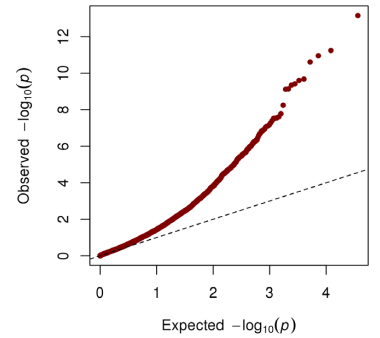

HURT - Are your feelings easily hurt?

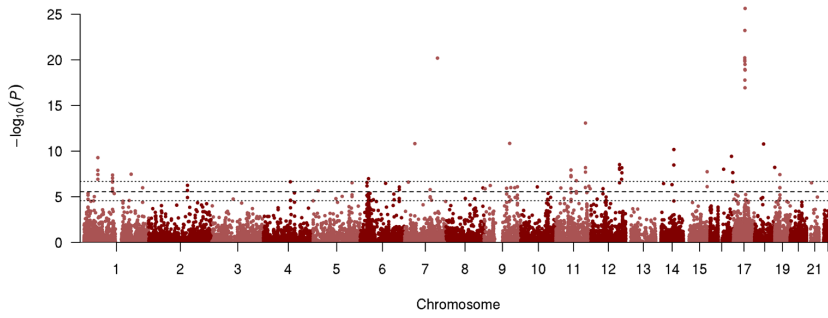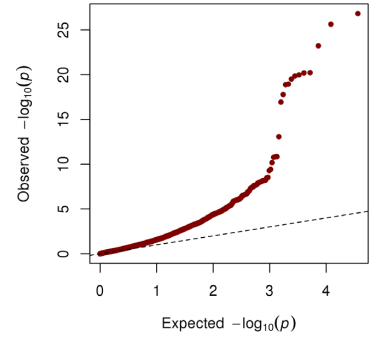

WORR-EMB - Do you worry too long after an embarrassing experience?

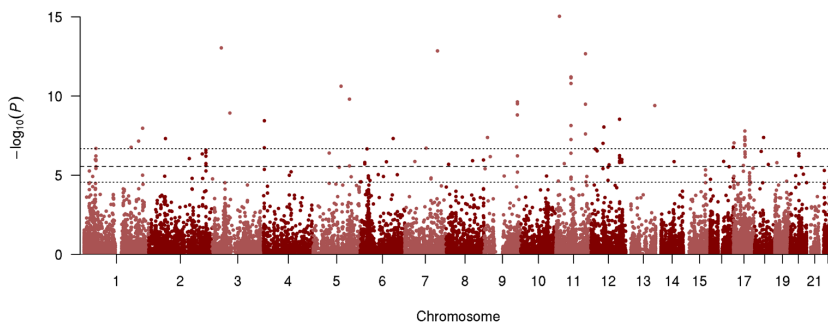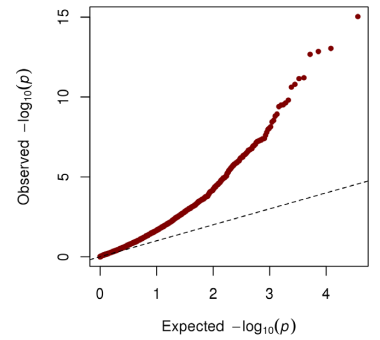

GUILT - Are you often troubled by feelings of guilt?

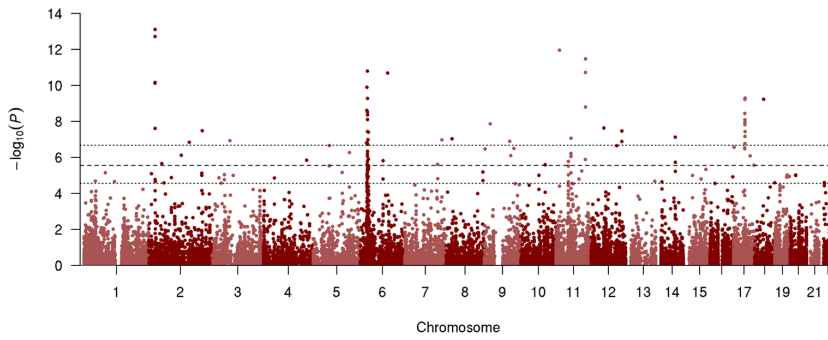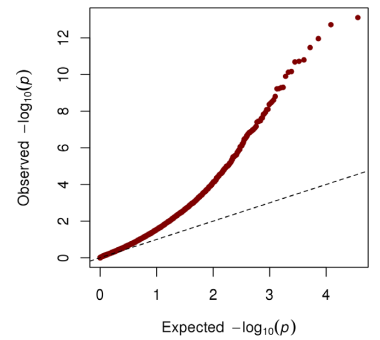

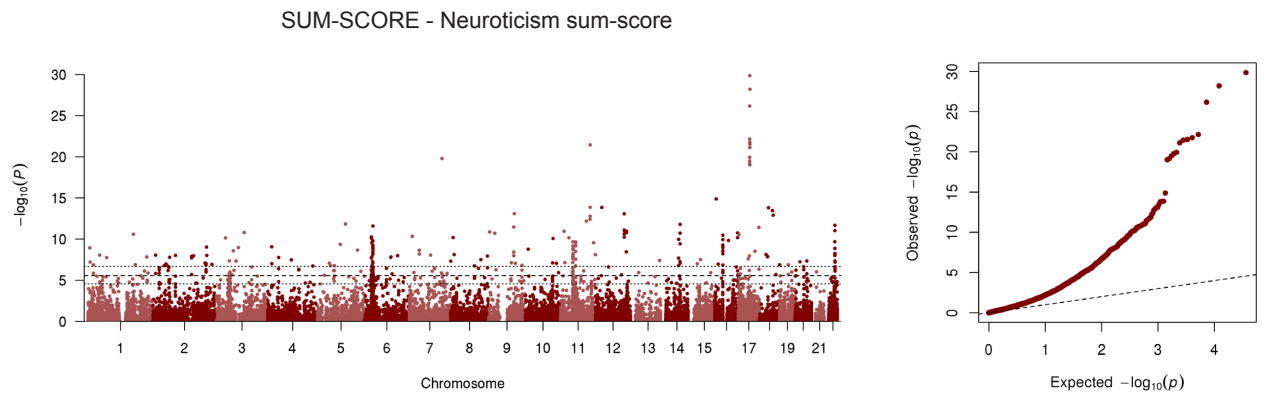

**Supplementary Figure 22. Manhattan and quantile-quantile (Q-Q) plots of the gene-based association results for the individual items and the neuroticism sum-score.**

Gene association results from the MAGMA gene-based tests, which are based on the summary statistics of the meta-analyses of the 12 neuroticism items and the sum-score. Each dot represents a gene. The y-axis shows the  $-\log_{10} P$  values and the x-axis the chromosomal position of a given gene. Dashed lines indicate genome-wide significance ( $P < 2.75 \times 10^{-6}$ ). The upper dotted line indicates a more stringent Bonferroni-corrected significance threshold, where we corrected for testing 13 phenotypes;  $P < 2.12 \times 10^{-7}$  ( $2.75 \times 10^{-6}/13$ ) whereas the lower dotted line indicates the ‘suggestive’ significance threshold ( $P < 2.75 \times 10^{-5}$ ). See **Supplementary Table 1** for an explanation of item labels.

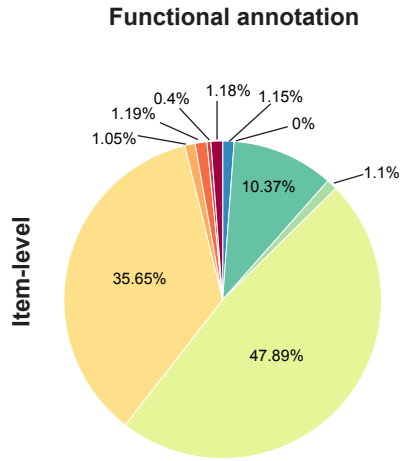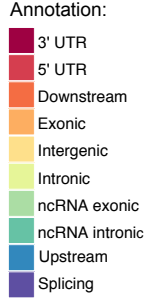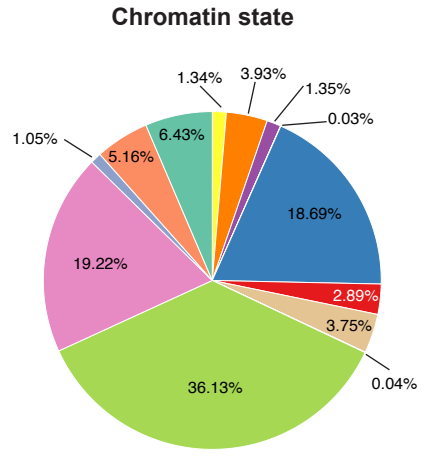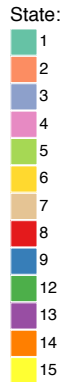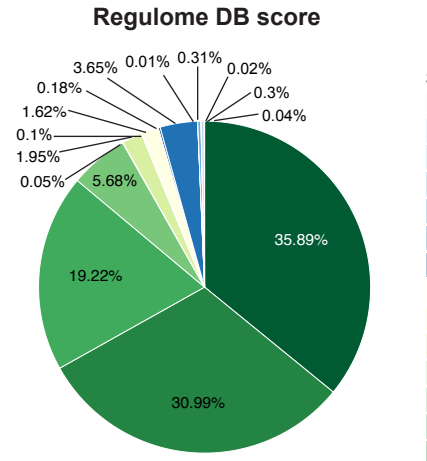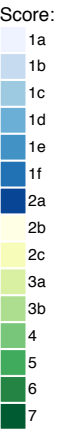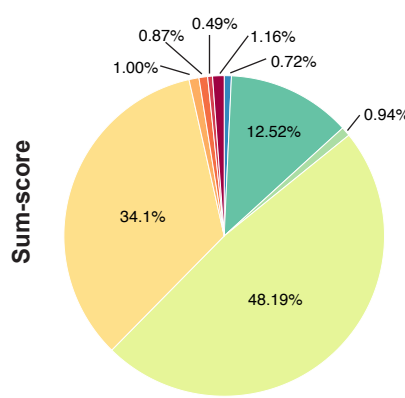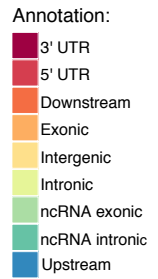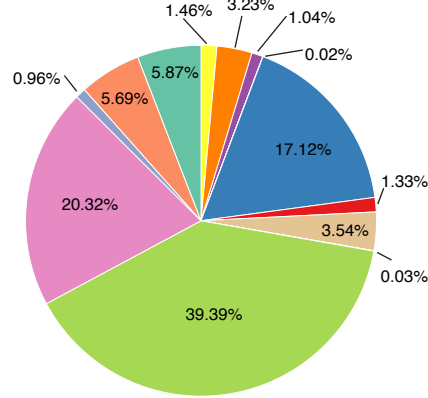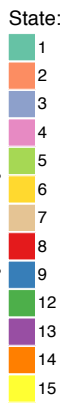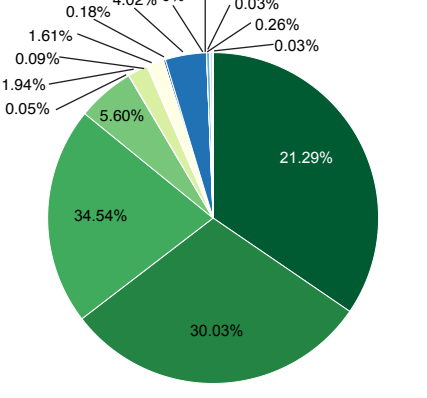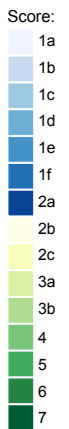



**Supplementary Figure 23. Functional categories, chromatin state and regulome DB score for SNPs that were GWS in item-level analyses versus analysis of the neuroticism sum-score.**

The functional annotation indicates the functional consequences on the gene to which a given SNP was annotated (**Supplementary Table 6**). The chromatin state refers to the minimum (i.e., most active) chromatin state across 127 tissues for all genome-wide significant SNPs. The lower the regulome DB (database) score, the more likely it is that the SNP has a regulatory function. Coding of the chromatin states and regulome DB scores is presented in **Supplementary Tables 7-8**. Annotation was performed in FUMA<sup>7</sup>.

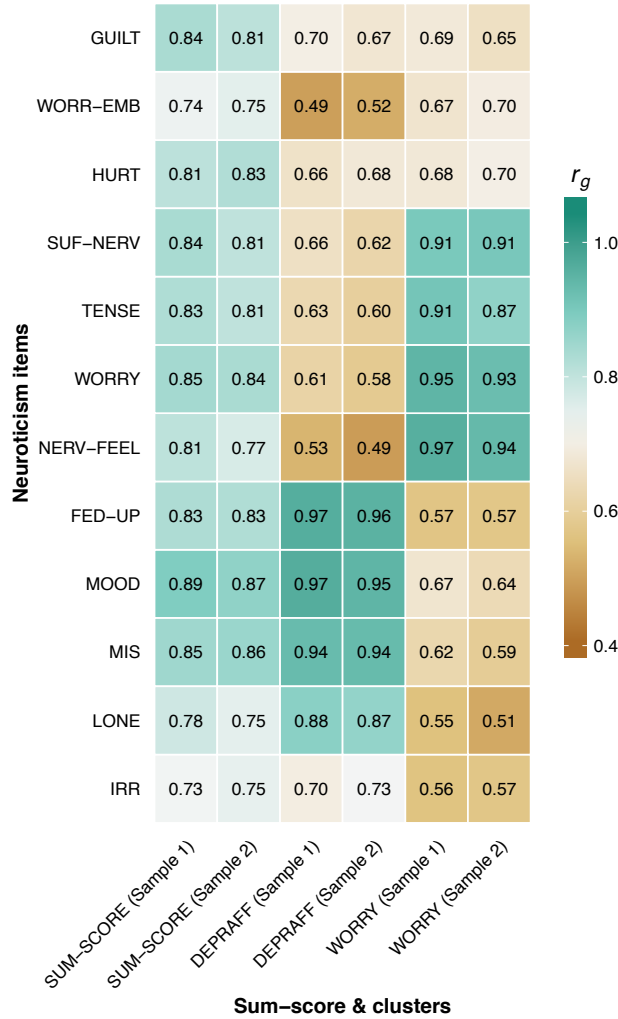

**Supplementary Figure 24. Genetic correlations between the 12 neuroticism items and the sum- and cluster-scores in samples 1 and 2.**

Genetic correlations between the 12 neuroticism items and the sum- and cluster-scores in both samples. The genetic correlations of the same items measured in both samples are presented on the diagonal. All reported genetic correlations, computed with bivariate LD score regression, are significantly different from zero after Bonferroni correction ( $P < 2.22 \times 10^{-4}$ ).

See **Supplementary Table 1** for a description of the item labels.

## Supplementary References

1. Eysenck, B. G., Eysenck, H. J. & Barrett, P. A revised version of the psychoticism scale. *Pers. Individ. Dif.* **6**, 21–29 (1985).
2. Beck, A. T., Ward, C. H., Mendelson, M., Mock, J. & Erbaugh, J. An Inventory for Measuring Depression. *Arch. Gen. Psychiatry* **4**, 561–571 (1961).
3. Rush, A. J., Gullion, C. M., Basco, M. R., Jarrett, R. B. & Trivedi, M. H. The Inventory of Depressive Symptomatology (IDS): psychometric properties. *Psychol. Med.* **26**, 477–486 (1996).
4. Hamilton, M. . Hamilton Depression Rating Scale (HDRS). *J Neurol Neurosurg Psychiatry* **23**, 56–62 (1960).
5. Achenbach, T. *Manual for the Child Behavior Checklist/4-18 and 1991 Profile*. (Burlington, VT: University of Vermont, Department of Psychiatry, 1991).
6. Bulik-Sullivan, B. K. *et al.* LD Score regression distinguishes confounding from polygenicity in genome-wide association studies. *Nat. Genet.* **47**, 291–295 (2015).
7. Watanabe, K., Taskesen, E., Bochoven, A. van & Posthuma, D. FUMA: Functional mapping and annotation of genetic associations. *Nat. Commun.* **8**, (2017).
8. American Psychiatric Association. *Diagnostic and statistical manual of mental disorders (5th ed.)*. (Author, 2013).  
doi:<http://dx.doi.org/10.1176/appi.books.9780890425596>
